# Supplementary material for: Microevolutionary dynamics of eccDNA in Chinese hamster ovary cells grown in fed-batch cultures under control and lactate-stressed conditions
Source: Research Square preprint supplement (doi:10.21203/rs.3.rs-2306689/v1), 2022-12-05
Supplement: Supplementary file 1 [file 36eab2e1fe309b4164d40c9f.xlsx]

## Sheet: S13
Table S13: EccDNA-Relevant KEGG Pathways. Full details of KEGG analysis of eccDNA-relevant genes
ID	Description	GeneRatio	BgRatio	pvalue	p.adjust	qvalue	geneID	Count
hsa05230	Central carbon metabolism in cancer	31/300	70/8162	1.42e-26	3.99e-24	1.8e-24	207/1956/2064/2260/2263/2261/3091/3098/3417/3418/3815/3845/3939/5604/5594/5595/4233/2475/4609/4893/5156/5159/5290/5296/5315/5728/5894/5979/6510/6513/7157	31
hsa05215	Prostate cancer	33/300	97/8162	8.48e-24	1.19e-21	5.35e-22	207/673/595/898/1026/9586/1499/1950/1956/2064/2260/2263/2308/3320/3845/5604/5594/5595/4193/2475/4790/4893/5156/5159/5290/5296/5728/5894/5925/5970/6654/7039/7157	33
hsa05220	Chronic myeloid leukemia	29/300	76/8162	1.14e-22	1.06e-20	4.78e-21	25/207/613/673/595/1019/1021/1026/1029/3065/3845/5604/5594/5595/4193/2122/4609/4790/4893/5290/5296/5781/5894/5925/5970/4089/6654/7040/7157	29
hsa05218	Melanoma	28/300	72/8162	3.42e-22	2.4e-20	1.08e-20	207/673/595/999/1019/1021/1026/1029/1950/1956/2247/26281/2260/3845/5604/5594/5595/4193/4233/4893/5156/5159/5290/5296/5728/5894/5925/7157	28
hsa05219	Bladder cancer	22/300	41/8162	1.66e-21	9.24e-20	4.17e-20	673/595/999/1019/1026/1029/1612/1950/1956/2064/2261/3845/5604/5594/5595/4193/4313/4609/4893/5894/5925/7157	22
hsa05212	Pancreatic cancer	28/300	76/8162	1.98e-21	9.24e-20	4.17e-20	207/673/675/595/1019/1021/1026/1029/1950/1956/2064/3845/5604/5594/5595/2475/4790/5290/5296/5879/5888/5894/5925/5970/4089/7039/7040/7157	28
hsa05210	Colorectal cancer	29/300	86/8162	6.71e-21	2.68e-19	1.21e-19	207/673/836/595/1026/1499/1950/1956/3845/5604/5594/5595/4292/4436/4437/2956/2475/4609/4893/5290/5296/5879/5894/387/4089/6654/7039/7040/7157	29
hsa05223	Non-small cell lung cancer	26/300	72/8162	1.03e-19	3.6e-18	1.62e-18	207/238/673/595/1019/1021/1026/1029/1950/1956/2064/3845/5604/5594/5595/4233/4893/5290/5296/5894/5925/5979/6256/6654/7039/7157	26
hsa05214	Glioma	26/300	75/8162	3.42e-19	1.06e-17	4.79e-18	207/673/595/1019/1021/1026/1029/1950/1956/3845/5604/5594/5595/4193/2475/4893/5156/5159/5290/5296/5728/5894/5925/6654/7039/7157	26
hsa05226	Gastric cancer	34/300	149/8162	2.69e-18	7.52e-17	3.39e-17	5243/207/673/595/898/999/1026/1499/1950/1956/2064/2247/26281/2263/3845/5604/5594/5595/4233/4292/2475/4583/4609/4893/5290/5296/5894/5925/6256/4089/6654/7015/7040/7157	34
hsa05225	Hepatocellular carcinoma	35/300	168/8162	1.84e-17	4.68e-16	2.11e-16	207/8289/673/595/1019/1021/1026/1029/1499/1956/3481/9817/3845/5604/5594/5595/4233/2475/4609/4780/4893/5290/5296/5728/5894/5925/4089/6597/6598/6605/6654/7015/7039/7040/7157	35
hsa01521	EGFR tyrosine kinase inhibitor resistance	25/300	79/8162	2.11e-17	4.68e-16	2.11e-16	207/673/1950/1956/2064/2065/2247/2263/2261/3845/5604/5594/5595/4233/2475/4763/4893/5156/5159/5290/5296/5728/5894/6654/7039	25
hsa05213	Endometrial cancer	22/300	58/8162	2.17e-17	4.68e-16	2.11e-16	207/673/595/999/1026/1499/1950/1956/2064/3845/5604/5594/5595/4292/4609/4893/5290/5296/5728/5894/6654/7157	22
hsa05205	Proteoglycans in cancer	38/300	205/8162	4.58e-17	9.16e-16	4.13e-16	207/673/836/595/967/1026/1499/1956/2064/2065/2247/2260/2335/3091/3481/3845/5604/5594/5595/4193/4233/406991/4313/2475/4609/4893/5290/5296/5781/5879/5894/387/6654/7040/7078/7124/7157/117581	38
hsa04151	PI3K-Akt signaling pathway	50/300	354/8162	5.27e-17	9.84e-16	4.44e-16	207/672/595/898/1019/1021/1026/9586/1950/1956/2064/2065/2149/2247/26281/2260/2263/2261/2335/3320/3481/3815/3845/3912/5604/5594/5595/4193/4233/2475/4609/4790/4893/4908/5156/5159/5290/5294/5296/5518/5563/5728/5879/5894/5970/6256/6446/6654/7039/7157	50
hsa04218	Cellular senescence	32/300	156/8162	7.74e-16	1.35e-14	6.11e-15	207/472/545/595/898/1019/1021/1026/1029/2308/3805/3845/5604/5594/5595/4193/4361/2475/4609/4683/4790/4893/5290/5296/5728/10111/5894/5925/5970/23411/7040/7157	32
hsa05224	Breast cancer	31/300	147/8162	9.89e-16	1.63e-14	7.35e-15	207/673/672/675/595/1019/1021/1026/1499/1950/1956/2064/2247/26281/2260/3815/3845/5604/5594/5595/2475/4609/4853/4893/5290/5296/5728/5894/5925/6654/7157	31
hsa05216	Thyroid cancer	17/300	37/8162	2.13e-15	3.32e-14	1.5e-14	673/595/999/1026/1499/3845/5604/5594/5595/4609/4893/7849/5468/5979/6256/7157/7175	17
hsa05160	Hepatitis C	31/300	157/8162	6.91e-15	1.02e-13	4.6e-14	207/673/836/595/975/1019/1021/1026/1499/1950/1956/3458/3661/3845/3949/5604/5594/5595/4609/4790/4893/5290/5296/5518/5894/5925/5970/6256/6654/7124/7157	31
hsa03440	Homologous recombination	17/300	41/8162	1.78e-14	2.49e-13	1.12e-13	472/641/672/675/146956/4361/80198/4683/79728/10111/5888/5889/5893/8438/5932/11073/7517	17
hsa05211	Renal cell carcinoma	21/300	69/8162	2.04e-14	2.59e-13	1.17e-13	207/673/1026/2034/2271/3091/3845/5604/5594/5595/4233/4893/5290/5296/5781/5879/5894/6513/6654/7039/7040	21
hsa05206	MicroRNAs in cancer	43/300	310/8162	2.04e-14	2.59e-13	1.17e-13	5243/25/472/672/836/595/898/1021/1026/1029/23405/1956/2064/2065/2261/3065/8091/3845/5604/5594/5595/4193/4233/406991/406913/406937/407007/2475/4609/4790/4853/4893/5156/5159/5290/5296/5728/5894/387/23411/6654/7078/7157	43
hsa05163	Human cytomegalovirus infection	36/300	225/8162	3.96e-14	4.82e-13	2.17e-13	207/567/836/595/1019/1021/1026/1029/115004/9586/1499/1956/2767/2776/2778/3661/3845/5604/5594/5595/4193/2475/4609/4790/4893/5156/5290/5296/5879/5894/5925/5970/387/6654/7124/7157	36
hsa01522	Endocrine resistance	24/300	98/8162	5.86e-14	6.84e-13	3.09e-13	207/673/595/1019/1026/1029/1956/2064/2778/3845/5604/5594/5595/4193/4313/2475/4853/4893/5290/5296/5894/5925/6654/7157	24
hsa04068	FoxO signaling pathway	27/300	131/8162	1.4e-13	1.57e-12	7.06e-13	207/472/673/595/1026/1950/1956/2290/2308/8471/3845/5604/5594/5595/4193/4893/5290/5296/5563/5728/5894/6446/23411/6502/4089/6654/7040	27
hsa05165	Human papillomavirus infection	43/300	331/8162	2.12e-13	2.28e-12	1.03e-12	207/472/545/836/595/898/1019/1021/1026/1108/9586/1499/1950/1956/2335/2308/2778/3065/3659/3661/3845/3912/5604/5594/5595/4193/2475/4790/4853/4893/5159/5290/5296/5315/5518/5728/5894/5925/5970/6654/7015/7124/7157	43
hsa05235	PD-L1 expression and PD-1 checkpoint pathway in cancer	22/300	89/8162	5.54e-13	5.75e-12	2.59e-12	207/238/29126/1950/1956/3091/3458/3845/5604/5594/5595/2475/4615/4790/4893/5290/5296/5728/5781/5894/5970/54106	22
hsa05208	Chemical carcinogenesis - reactive oxygen species	34/300	223/8162	8.97e-13	8.97e-12	4.04e-12	25/1646/207/673/1329/1351/1537/1950/1956/3091/9817/3845/5604/5609/5594/5595/4233/4512/4780/4790/4893/5290/5296/5728/5781/5879/5894/5970/6389/6390/6391/6392/6647/6654	34
hsa04010	MAPK signaling pathway	39/300	294/8162	1.61e-12	1.55e-11	7e-12	207/673/773/836/1950/1956/2064/2065/2247/26281/2260/2263/2261/3312/3481/3815/3845/5604/5609/5594/5595/2122/4233/4609/4615/4763/4790/4893/4908/5156/5159/5879/5894/5970/6654/7039/7040/7124/7157	39
hsa04012	ErbB signaling pathway	21/300	85/8162	1.92e-12	1.8e-11	8.1e-12	25/207/673/1026/1950/1956/2064/2065/3845/5604/5609/5594/5595/2475/4609/4893/5290/5296/5894/6654/7039	21
hsa01524	Platinum drug resistance	19/300	73/8162	8.26e-12	7.46e-11	3.37e-11	207/472/330/672/836/1026/1029/2064/2067/5594/5595/4193/4292/4436/4437/2956/5290/5296/7157	19
hsa05221	Acute myeloid leukemia	18/300	67/8162	1.66e-11	1.45e-10	6.54e-11	207/673/595/3815/3845/5604/5594/5595/2475/4609/4790/4893/5290/5296/5894/5914/5970/6654	18
hsa05161	Hepatitis B	27/300	162/8162	2.78e-11	2.36e-10	1.06e-10	207/673/836/898/1026/9586/3661/3845/5604/5609/5594/5595/4609/4615/4790/4893/5290/5296/5894/5925/5970/4089/6654/6778/7040/7124/7157	27
hsa05167	Kaposi sarcoma-associated herpesvirus infection	29/300	194/8162	7.77e-11	6.4e-10	2.89e-10	207/836/595/1019/1021/1026/1499/2919/2247/3091/3661/3845/81631/5604/5609/5594/5595/2475/4609/4790/4893/5290/5294/5296/5879/5894/5925/5970/7157	29
hsa05222	Small cell lung cancer	20/300	92/8162	8.21e-11	6.57e-10	2.96e-10	207/330/836/595/898/1019/1021/1026/2335/3912/4609/4790/5290/5296/5728/5925/5970/6256/6502/7157	20
hsa04919	Thyroid hormone signaling pathway	22/300	121/8162	3.65e-10	2.84e-09	1.28e-09	207/595/1499/2308/3065/3091/3845/5604/5594/5595/4193/2475/4609/10499/4853/4893/5290/5296/5894/6256/6513/7157	22
hsa04014	Ras signaling pathway	31/300	235/8162	4.28e-10	3.24e-09	1.46e-09	25/207/1950/1956/2247/26281/2260/2263/2261/3481/3815/3845/5604/5594/5595/4233/4763/4790/4893/4908/5156/5159/5290/5296/5781/5879/5894/5970/387/6654/7039	31
hsa05166	Human T-cell leukemia virus 1 infection	30/300	222/8162	4.6e-10	3.39e-09	1.53e-09	207/472/545/567/595/898/1019/1026/1029/9586/3845/5604/5594/5595/4488/4609/4790/4893/5290/5296/5728/5925/5970/6513/4089/7015/7040/7124/7157/7514	30
hsa03460	Fanconi anemia pathway	15/300	54/8162	5.05e-10	3.63e-09	1.64e-09	545/641/672/675/146956/2067/2072/22909/4292/80198/79728/5395/11201/5888/5889	15
hsa04066	HIF-1 signaling pathway	20/300	109/8162	2e-09	1.4e-08	6.33e-09	207/1026/1950/1956/2023/2064/2597/3091/3098/3458/3939/5604/5594/5595/2475/4790/5290/5296/5970/6513	20
hsa04015	Rap1 signaling pathway	28/300	210/8162	2.47e-09	1.69e-08	7.61e-09	207/673/999/1499/1950/1956/2149/2247/26281/2260/2263/2261/2776/2778/3815/3845/5604/5594/5595/4233/4893/5156/5159/5290/5296/5879/5894/387	28
hsa04933	AGE-RAGE signaling pathway in diabetic complications	19/300	100/8162	2.79e-09	1.86e-08	8.39e-09	207/836/595/1019/2335/2308/3845/5594/5595/4313/4790/4893/5290/5296/5879/5970/4089/7040/7124	19
hsa04110	Cell cycle	21/300	126/8162	4.84e-09	3.1e-08	1.4e-08	25/472/545/595/898/1019/1021/1026/1029/8454/3065/4193/4609/5591/5885/5925/6502/4089/9126/7040/7157	21
hsa04915	Estrogen signaling pathway	22/300	138/8162	4.87e-09	3.1e-08	1.4e-08	207/9586/1956/2776/2778/3320/3312/3845/3875/3880/5604/5594/5595/4313/10499/4893/5290/5296/5894/5914/6654/7039	22
hsa04660	T cell receptor signaling pathway	19/300	104/8162	5.54e-09	3.45e-08	1.56e-08	207/1019/1493/3458/3845/5604/5609/5594/5595/4790/4893/5290/5296/5788/5894/5970/387/6654/7124	19
hsa04722	Neurotrophin signaling pathway	20/300	119/8162	9.81e-09	5.97e-08	2.69e-08	25/207/673/3845/5604/5609/5594/5595/4790/4893/4908/5290/5296/5781/5879/5894/5970/387/6654/7157	20
hsa05170	Human immunodeficiency virus 1 infection	27/300	212/8162	1.32e-08	7.72e-08	3.48e-08	207/200315/9582/472/545/567/836/115004/8454/2767/2776/3661/3845/5604/5609/5594/5595/2475/4615/4790/4893/5290/5296/5879/5894/5970/7124	27
hsa05207	Chemical carcinogenesis - receptor activation	27/300	212/8162	1.32e-08	7.72e-08	3.48e-08	207/773/595/9586/1950/1956/2247/26281/2778/3320/688/3845/5604/5594/5595/2475/4609/4790/4853/4893/5290/5296/5894/5925/5970/6256/6654	27
hsa05203	Viral carcinogenesis	26/300	204/8162	2.46e-08	1.4e-07	6.33e-08	836/595/898/1019/1021/1026/1029/1108/9586/3065/3661/3845/5594/5595/4193/4790/4893/5290/5296/5315/5879/5925/5970/387/6502/7157	26
hsa05231	Choline metabolism in cancer	17/300	98/8162	8.01e-08	4.48e-07	2.02e-07	207/1950/1956/3091/3845/5604/5594/5595/2475/4893/5156/5159/5290/5296/5879/5894/6654	17
hsa04072	Phospholipase D signaling pathway	21/300	148/8162	8.98e-08	4.93e-07	2.22e-07	207/1950/1956/2149/2778/3815/3845/5604/5594/5595/2475/4893/5156/5159/5290/5294/5296/5781/5894/387/6654	21
hsa04210	Apoptosis	20/300	136/8162	1e-07	5.4e-07	2.44e-07	207/472/330/836/1676/1677/3845/5604/5594/5595/4790/4893/142/5290/5296/5551/5894/5970/7124/7157	20
hsa04917	Prolactin signaling pathway	14/300	70/8162	1.83e-07	9.67e-07	4.36e-07	207/595/3659/3845/5604/5594/5595/4790/4893/5290/5296/5894/5970/6654	14
hsa04932	Non-alcoholic fatty liver disease	21/300	155/8162	2.01e-07	1.04e-06	4.71e-07	207/836/1329/1351/1537/4512/4790/5290/5296/5468/5563/5879/5970/6256/6389/6390/6391/6392/6720/7040/7124	21
hsa04550	Signaling pathways regulating pluripotency of stem cells	20/300	143/8162	2.34e-07	1.19e-06	5.37e-07	90/207/1499/2247/2260/2263/2261/3670/3845/5604/5594/5595/4609/4893/5290/5296/5894/4089/6657/463	20
hsa05417	Lipid and atherosclerosis	25/300	215/8162	2.82e-07	1.39e-06	6.27e-07	207/836/2919/3320/3308/3312/3661/3845/3949/5609/5594/5595/4615/4780/4790/4893/5290/5296/5468/5879/5970/387/6256/7124/7157	25
hsa04213	Longevity regulating pathway - multiple species	13/300	62/8162	2.83e-07	1.39e-06	6.27e-07	207/2308/3065/3312/8471/3845/2475/4893/5290/5296/5563/23411/6647	13
hsa04071	Sphingolipid signaling pathway	18/300	119/8162	2.88e-07	1.39e-06	6.28e-07	207/2776/3845/5604/5594/5595/4790/4893/5290/5296/5518/5728/5879/5894/5970/387/7124/7157	18
hsa04910	Insulin signaling pathway	19/300	137/8162	5.39e-07	2.56e-06	1.15e-06	31/207/673/2194/2308/3098/8471/3845/5604/5594/5595/2475/4893/5290/5296/5563/5894/6654/6720	19
hsa05202	Transcriptional misregulation in cancer	23/300	193/8162	5.55e-07	2.59e-06	1.17e-06	472/330/1026/2308/2521/3020/8358/3065/3087/8091/4193/4233/4609/4613/4790/5077/5081/7849/5468/5914/5970/6256/7157	23
hsa04211	Longevity regulating pathway	15/300	89/8162	6.95e-07	3.19e-06	1.44e-06	207/9586/2308/8471/3845/2475/4790/4893/5290/5296/5468/5563/5970/23411/7157	15
hsa00020	Citrate cycle (TCA cycle)	9/300	30/8162	7.87e-07	3.54e-06	1.6e-06	47/2271/3417/3418/4967/6389/6390/6391/6392	9
hsa05142	Chagas disease	16/300	102/8162	8.08e-07	3.54e-06	1.6e-06	207/2767/2776/2778/3458/5594/5595/4615/4790/5290/5296/5518/5970/7040/54106/7124	16
hsa05146	Amoebiasis	16/300	102/8162	8.08e-07	3.54e-06	1.6e-06	836/909/2919/2335/2767/2776/2778/3458/3912/4583/4790/5290/5296/5970/7040/7124	16
hsa01200	Carbon metabolism	17/300	115/8162	8.67e-07	3.67e-06	1.66e-06	55902/2023/2271/2597/9563/3098/3417/3418/4199/4200/10873/4967/5315/6389/6390/6391/6392	17
hsa04664	Fc epsilon RI signaling pathway	13/300	68/8162	8.76e-07	3.67e-06	1.66e-06	207/3845/5604/5609/5594/5595/4893/5290/5296/5879/5894/6654/7124	13
hsa04934	Cushing syndrome	20/300	155/8162	8.78e-07	3.67e-06	1.66e-06	673/595/898/1019/1021/1026/1029/9586/1499/1956/2271/2767/2776/2778/3949/5604/5594/5595/56246/5925	20
hsa04926	Relaxin signaling pathway	18/300	129/8162	9.85e-07	4.06e-06	1.83e-06	207/9586/1956/2778/3845/5604/5609/5594/5595/4313/4790/4893/5290/5296/5894/5970/6654/7040	18
hsa04625	C-type lectin receptor signaling pathway	16/300	104/8162	1.06e-06	4.29e-06	1.94e-06	207/602/3659/3845/5594/5595/4193/4790/4893/5290/5296/5781/5894/5970/387/7124	16
hsa04510	Focal adhesion	23/300	201/8162	1.14e-06	4.58e-06	2.06e-06	207/330/673/595/1499/1950/1956/2064/2335/3912/5604/5594/5595/4233/5156/5159/5290/5296/5728/5879/5894/387/6654	23
hsa05169	Epstein-Barr virus infection	23/300	202/8162	1.25e-06	4.93e-06	2.22e-06	207/567/836/595/898/1019/1021/1026/3065/3661/5609/4193/4609/4615/4790/5290/5296/5879/5925/5970/6502/7124/7157	23
hsa04810	Regulation of actin cytoskeleton	24/300	218/8162	1.34e-06	5.23e-06	2.36e-06	673/1950/1956/2149/2247/26281/2260/2263/2261/2335/3845/5604/5594/5595/79784/4893/5156/5159/5290/5296/5879/5894/387/6654	24
hsa04662	B cell receptor signaling pathway	14/300	82/8162	1.4e-06	5.31e-06	2.39e-06	207/975/3845/5604/5594/5595/4790/4893/5290/5296/5879/5894/5970/6654	14
hsa04730	Long-term depression	12/300	60/8162	1.4e-06	5.31e-06	2.39e-06	673/773/2767/2776/2778/3845/5604/5594/5595/4893/5518/5894	12
hsa04668	TNF signaling pathway	16/300	112/8162	2.91e-06	1.09e-05	4.9e-06	207/602/330/836/9586/2919/3659/5604/5609/5594/5595/4790/5290/5296/5970/7124	16
hsa05418	Fluid shear stress and atherosclerosis	18/300	139/8162	2.97e-06	1.09e-05	4.94e-06	90/207/1499/3320/3458/9817/5609/4313/4780/4790/5290/5296/5563/5879/5970/387/7124/7157	18
hsa03450	Non-homologous end-joining	6/300	13/8162	3.24e-06	1.18e-05	5.31e-06	3981/4361/5591/10111/7518/2547	6
hsa04540	Gap junction	14/300	88/8162	3.35e-06	1.2e-05	5.43e-06	1950/1956/2767/2776/2778/3845/5604/5594/5595/4893/5156/5159/5894/6654	14
hsa05131	Shigellosis	25/300	247/8162	3.78e-06	1.34e-05	6.05e-06	207/472/115004/8454/1956/2308/3020/8358/3098/3661/81631/5594/5595/4193/2475/4615/4790/5290/5296/5879/5970/387/7124/7157/7307	25
hsa04150	mTOR signaling pathway	19/300	156/8162	3.98e-06	1.39e-05	6.29e-06	207/673/3845/5604/5594/5595/2475/4893/5290/5296/5563/5728/5894/387/253260/6446/6502/6654/7124	19
hsa04930	Type II diabetes mellitus	10/300	46/8162	4.87e-06	1.68e-05	7.6e-06	773/3098/8471/5594/5595/2475/5290/5296/5315/7124	10
hsa04935	Growth hormone synthesis, secretion and action	16/300	119/8162	6.51e-06	2.22e-05	1e-05	207/9586/2767/2776/2778/8471/3845/5604/5594/5595/2475/4893/5290/5296/5894/6654	16
hsa04928	Parathyroid hormone synthesis, secretion and action	15/300	106/8162	6.72e-06	2.27e-05	1.02e-05	673/1026/9586/1956/2260/2625/2767/2776/2778/5604/5594/5595/5894/387/6256	15
hsa04152	AMPK signaling pathway	16/300	121/8162	8.1e-06	2.7e-05	1.22e-05	31/207/595/9586/2194/2308/3156/8471/2475/5290/5296/5468/5518/5563/23411/6720	16
hsa04659	Th17 cell differentiation	15/300	108/8162	8.49e-06	2.8e-05	1.26e-05	2625/3091/3320/3458/3662/5594/5595/2475/4790/5914/5970/6256/4089/6778/7040	15
hsa04115	p53 signaling pathway	12/300	73/8162	1.2e-05	3.91e-05	1.76e-05	472/545/836/595/898/1019/1021/1026/1029/4193/5728/7157	12
hsa03430	Mismatch repair	7/300	23/8162	1.25e-05	4.01e-05	1.81e-05	9156/3978/4292/4436/4437/2956/5395	7
hsa05145	Toxoplasmosis	15/300	112/8162	1.33e-05	4.24e-05	1.91e-05	207/330/836/3312/3458/3912/3949/5594/5595/4615/4790/5294/5970/7040/7124	15
hsa04140	Autophagy - animal	17/300	141/8162	1.48e-05	4.66e-05	2.1e-05	207/203228/1612/3091/8471/3845/81631/5604/5594/5595/2475/4893/5290/5296/5563/5728/5894	17
hsa04936	Alcoholic liver disease	17/300	142/8162	1.63e-05	5.06e-05	2.28e-05	31/207/836/595/1499/2919/2194/2308/3661/5609/4615/4790/5563/5970/23411/6720/7124	17
hsa05415	Diabetic cardiomyopathy	21/300	203/8162	1.66e-05	5.1e-05	2.3e-05	207/1329/1351/1537/2597/4313/4512/2475/4790/142/5290/5296/5728/5879/5970/6389/6390/6391/6392/6513/7040	21
hsa04929	GnRH secretion	11/300	64/8162	1.8e-05	5.47e-05	2.47e-05	207/2767/2776/3845/5604/5594/5595/4893/5290/5296/5894	11
hsa04650	Natural killer cell mediated cytotoxicity	16/300	131/8162	2.25e-05	6.77e-05	3.05e-05	673/836/3458/3845/5604/5594/5595/4893/5290/5296/5551/5781/5879/5894/6654/7124	16
hsa04620	Toll-like receptor signaling pathway	14/300	104/8162	2.44e-05	7.27e-05	3.28e-05	207/3661/5604/5609/5594/5595/4615/4790/5290/5296/5879/5970/54106/7124	14
hsa05010	Alzheimer disease	31/300	384/8162	2.81e-05	8.29e-05	3.74e-05	207/673/836/1329/1351/1499/1537/22943/2597/2776/2906/8471/3845/5604/5609/5594/5595/4512/2475/4790/4893/5290/5296/5894/5970/6389/6390/6391/6392/55630/7124	31
hsa04912	GnRH signaling pathway	13/300	93/8162	3.17e-05	9.26e-05	4.18e-05	1956/2767/2776/2778/3845/5604/5609/5594/5595/4313/4893/5894/6654	13
hsa04931	Insulin resistance	14/300	108/8162	3.76e-05	0.000108464	4.89e-05	207/9586/2308/2475/4790/5290/5296/5563/5728/5781/5970/6513/6720/7124	14
hsa05135	Yersinia infection	16/300	137/8162	3.94e-05	0.000112519	5.08e-05	207/2335/2776/3661/5604/5609/5594/5595/4615/4790/5290/5296/5879/5970/387/7124	16
hsa04370	VEGF signaling pathway	10/300	59/8162	4.92e-05	0.000137793	6.22e-05	207/3845/5604/5594/5595/4893/5290/5296/5879/5894	10
hsa04520	Adherens junction	11/300	71/8162	4.92e-05	0.000137793	6.22e-05	999/1499/1956/2064/2260/5594/5595/4233/5879/387/4089	11
hsa05132	Salmonella infection	22/300	249/8162	0.000117391	0.000325441	0.000146816	207/330/836/1499/2597/3320/5604/5609/5594/5595/4609/4615/4790/5290/5294/5788/5879/5894/5970/387/54106/7124	22
hsa04714	Thermogenesis	21/300	232/8162	0.000119232	0.000327304	0.000147656	8289/1329/1351/9586/1537/2260/2778/3845/4512/2475/4893/5468/5563/6389/6390/6391/6392/6597/6598/6605/6654	21
hsa05022	Pathways of neurodegeneration - multiple diseases	34/300	476/8162	0.000136067	0.00036989	0.000166868	6311/673/203228/836/1329/1351/1499/1537/22943/127602/2521/2776/2906/3092/3845/81631/5604/5609/5594/5595/4512/2475/4790/4893/5879/5894/5970/6389/6390/6391/6392/6647/23435/7124	34
hsa04371	Apelin signaling pathway	15/300	139/8162	0.000169301	0.000451468	0.00020367	207/595/999/2776/3845/81631/5604/5594/5595/2475/4893/5294/5563/5894/4089	15
hsa05162	Measles	15/300	139/8162	0.000169301	0.000451468	0.00020367	207/836/595/898/1019/1021/3312/3661/4615/4790/5290/5296/5970/54106/7157	15
hsa05164	Influenza A	17/300	171/8162	0.000174013	0.000459657	0.000207364	207/836/1019/1021/3458/3661/5604/5594/5595/4615/4790/5290/5296/5894/5970/7124/7514	17
hsa04920	Adipocytokine signaling pathway	10/300	69/8162	0.000192235	0.000503045	0.000226938	207/8471/2475/4790/5563/5781/5970/6256/6513/7124	10
hsa04062	Chemokine signaling pathway	18/300	192/8162	0.000236466	0.00061306	0.000276569	207/673/2919/2776/3845/5604/5594/5595/4790/4893/5290/5294/5296/5879/5894/5970/387/6654	18
hsa04380	Osteoclast differentiation	14/300	128/8162	0.00024148	0.000618329	0.000278945	207/3458/5604/5609/5594/5595/4790/5290/5296/5468/5879/5970/7040/7124	14
hsa04725	Cholinergic synapse	13/300	113/8162	0.000242915	0.000618329	0.000278945	207/773/9586/2767/2776/3845/5604/5594/5595/4893/5290/5294/5296	13
hsa00620	Pyruvate metabolism	8/300	47/8162	0.00027313	0.000688976	0.000310816	31/55902/2271/3939/4199/4200/10873/5315	8
hsa04630	JAK-STAT signaling pathway	16/300	162/8162	0.0002903	0.000725751	0.000327406	207/595/1026/1950/1956/3458/2475/4609/5156/5159/5290/5296/5781/5894/6654/6778	16
hsa05133	Pertussis	10/300	76/8162	0.000430051	0.00106561	0.000480728	836/3659/3661/5594/5595/4615/4790/5970/387/7124	10
hsa04613	Neutrophil extracellular trap formation	17/300	190/8162	0.000604392	0.00148447	0.000669686	207/8337/3014/3020/8358/3065/5604/5594/5595/2475/4790/5290/5296/5879/5894/5970/27180	17
hsa04350	TGF-beta signaling pathway	11/300	94/8162	0.000626368	0.00152507	0.000688001	90/8454/3458/5594/5595/4609/5518/387/4089/7040/7124	11
hsa04720	Long-term potentiation	9/300	67/8162	0.000711261	0.00171684	0.000774513	673/2776/2906/3845/5604/5594/5595/4893/5894	9
hsa05014	Amyotrophic lateral sclerosis	26/300	364/8162	0.000856615	0.00205002	0.000924821	283/6311/203228/836/1329/1351/1537/127602/2521/2906/81631/4512/2475/23636/9972/5879/6389/6390/6391/6392/23064/6647/23435/7124/7157/7175	26
hsa05134	Legionellosis	8/300	57/8162	0.00104387	0.00247698	0.00111743	836/2919/1915/3312/4615/4790/5970/7124	8
hsa04024	cAMP signaling pathway	18/300	221/8162	0.00126796	0.00298343	0.00134591	207/673/9586/2149/2740/2778/2906/5604/5594/5595/4790/5290/5296/5879/5894/5970/387/6662	18
hsa04020	Calcium signaling pathway	19/300	240/8162	0.00131155	0.00306029	0.00138058	773/1950/1956/2064/2065/2149/2247/26281/2260/2263/2261/2767/2776/2778/2906/4233/5156/5159/5979	19
hsa05034	Alcoholism	16/300	187/8162	0.00140099	0.00324195	0.00146254	673/9586/2778/2906/8337/3014/3020/8358/3065/3845/5604/5594/5595/4893/5894/6654	16
hsa04921	Oxytocin signaling pathway	14/300	154/8162	0.00155264	0.00356344	0.00160757	595/1026/1956/2776/2778/3845/5604/5594/5595/4893/5294/5563/5894/387	14
hsa04922	Glucagon signaling pathway	11/300	107/8162	0.00184245	0.0041942	0.00189212	31/207/9586/2308/2776/2778/3939/5315/5563/23411/6513	11
hsa05100	Bacterial invasion of epithelial cells	9/300	77/8162	0.00194762	0.00436268	0.00196812	999/8218/1499/2335/4233/5290/5296/5879/387	9
hsa05140	Leishmaniasis	9/300	77/8162	0.00194762	0.00436268	0.00196812	1915/3458/5594/5595/4615/4790/5970/7040/7124	9
hsa04623	Cytosolic DNA-sensing pathway	8/300	63/8162	0.0020225	0.00449445	0.00202757	115004/3661/4790/5437/11128/10621/5970/11277	8
hsa04960	Aldosterone-regulated sodium reabsorption	6/300	37/8162	0.0020826	0.0045557	0.0020552	3845/5594/5595/5290/5296/6446	6
hsa05143	African trypanosomiasis	6/300	37/8162	0.0020826	0.0045557	0.0020552	8542/2776/3458/4615/54106/7124	6
hsa05144	Malaria	7/300	50/8162	0.00217023	0.00471058	0.00212507	975/3458/4233/4615/7040/54106/7124	7
hsa04726	Serotonergic synapse	11/300	115/8162	0.00326481	0.00703189	0.00317228	673/773/836/2776/2778/3845/5604/5594/5595/4893/5894	11
hsa04916	Melanogenesis	10/300	101/8162	0.0038632	0.00825721	0.00372506	1499/2776/2778/3815/3845/5604/5594/5595/4893/5894	10
hsa05120	Epithelial cell signaling in Helicobacter pylori infection	8/300	70/8162	0.00395078	0.00838045	0.00378065	836/2919/1956/4233/4790/5781/5879/5970	8
hsa04914	Progesterone-mediated oocyte maturation	10/300	102/8162	0.00414767	0.00873194	0.00393922	207/673/3320/3845/5604/5594/5595/5290/5296/5894	10
hsa05016	Huntington disease	21/300	306/8162	0.00427224	0.00892706	0.00402724	836/8218/1329/1351/9586/1537/127602/2776/3065/3092/5609/4512/2475/5437/5468/6389/6390/6391/6392/6647/7157	21
hsa05020	Prion disease	19/300	273/8162	0.00555355	0.0115185	0.00519631	836/1329/1351/9586/1537/2906/3312/5594/5595/4512/5290/5296/5879/6389/6390/6391/6392/6647/7124	19
hsa05130	Pathogenic Escherichia coli infection	15/300	197/8162	0.00592362	0.0121957	0.00550181	25/836/2149/2597/5594/5595/4615/79784/4790/5781/5879/5970/387/9871/7124	15
hsa04360	Axon guidance	14/300	182/8162	0.0070776	0.0144652	0.00652564	25/1948/3845/5594/5595/4233/4893/5290/5296/23654/5781/5879/5894/387	14
hsa04657	IL-17 signaling pathway	9/300	94/8162	0.00746848	0.0151534	0.00683614	836/2919/3320/3458/5594/5595/4790/5970/7124	9
hsa04666	Fc gamma R-mediated phagocytosis	9/300	97/8162	0.00912297	0.0183772	0.00829047	207/5604/5594/5595/5290/5296/5788/5879/5894	9
hsa05321	Inflammatory bowel disease	7/300	65/8162	0.00948097	0.0189619	0.00855426	2625/3458/4790/5970/6778/7040/7124	7
hsa04270	Vascular smooth muscle contraction	11/300	134/8162	0.0102159	0.0202869	0.009152	673/796/2767/2776/2778/5604/5594/5595/79784/5894/387	11
hsa05152	Tuberculosis	13/300	180/8162	0.0151983	0.0299685	0.0135196	207/836/3458/5594/5595/4615/4790/5894/5970/387/7040/54106/7124	13
hsa04611	Platelet activation	10/300	124/8162	0.015717	0.0307745	0.0138832	207/2149/2776/2778/5594/5595/5290/5294/5296/387	10
hsa04137	Mitophagy - animal	7/300	72/8162	0.0161562	0.0314149	0.0141721	3091/3845/81631/4893/5970/64786/7157	7
hsa04923	Regulation of lipolysis in adipocytes	6/300	57/8162	0.0176472	0.0340774	0.0153733	207/2167/2778/8471/5290/5296	6
hsa04621	NOD-like receptor signaling pathway	13/300	184/8162	0.0179423	0.0344099	0.0155233	330/2919/3320/3661/81631/5594/5595/4615/4790/5970/387/7124/7158	13
hsa04658	Th1 and Th2 cell differentiation	8/300	92/8162	0.0195247	0.03719	0.0167774	2625/3458/5594/5595/4790/4853/5970/6778	8
hsa04918	Thyroid hormone synthesis	7/300	75/8162	0.0198459	0.0375314	0.0169315	213/9586/2776/2778/7849/5172/7038	7
hsa04022	cGMP-PKG signaling pathway	12/300	167/8162	0.0199721	0.0375314	0.0169315	207/9586/2767/2776/2969/8471/5604/5594/5595/5294/5894/387	12
hsa01523	Antifolate resistance	4/300	30/8162	0.0230801	0.0430829	0.0194359	1719/4790/5970/7124	4
hsa04612	Antigen processing and presentation	7/300	78/8162	0.0240874	0.0446653	0.0201498	567/3320/3308/3312/3458/3805/7124	7

## Sheet: S14
Table S14: EccDNA genes linked to genome instability. Full list of eccDNA genes observed in CHO cells that are linked to genome instability.
CHO eccDNA Sample Name	Chinese Hamster Entrez ID	Human Ortholog Entrez ID	Gene Symbol
D0	100689281	328	APEX1
D0	100689032	581	BAX
D0	100766849	651	BMP3
D0	100770242	958	CD40
D0	100767761	991	CDC20
D0	100760435	1072	CFL1
D0	100753220	1267	CNP
D0	100767867	1390	CREM
D0	100761664	1407	CRY1
D0	100759241	1545	CYP1B1
D0	100689028	1719	DHFR
D0	100755735	1791	DNTT
D0	100689276	1915	EEF1A1
D0	100773768	1977	EIF4E
D0	100750680	2081	ERN1
D0	100736557	2597	GAPDH
D0	100754725	2959	GTF2B
D0	100754755	3146	HMGB1
D0	100770083	3172	HNF4A
D0	100751290	3183	HNRNPC
D0	100773216	3188	HNRNPH2
D0	100750673	3208	HPCA
D0	100761713	3257	HPS1
D0	100689472	3312	HSPA8
D0	100689397	3320	HSP90AA1
D0	100689473	3329	HSPD1
D0	100774183	3397	ID1
D0	100751577	3399	ID3
D0	103158535	3418	IDH2
D0	100769260	3552	IL1A
D0	100772160	3600	IL15
D0	100763033	3688	ITGB1
D0	100774160	3952	LEP
D0	100772530	3973	LHCGR
D0	100770686	4069	LYZ
D0	107978039	4504	MT3
D0	100763316	4673	NAP1L1
D0	100754575	4703	NEB
D0	100769813	4904	YBX1
D0	100766030	5094	PCBP2
D0	100774878	5162	PDHB
D0	100766346	5354	PLP1
D0	100758159	5469	MED1
D0	100773447	5518	PPP2R1A
D0	100758888	5526	PPP2R5B
D0	100769874	5528	PPP2R5D
D0	100761729	5551	PRF1
D0	100756792	5879	RAC1
D0	100767723	5917	RARS1
D0	100757871	5928	RBBP4
D0	100761671	6136	RPL12
D0	100760077	6154	RPL26
D0	100753707	6194	RPS6
D0	100767024	6203	RPS9
D0	100689292	6208	RPS14
D0	100689053	6218	RPS17
D0	100773402	6469	SHH
D0	100775004	6566	SLC16A1
D0	100758279	6590	SLPI
D0	100767199	6667	SP1
D0	100774926	6670	SP3
D0	100765813	6794	STK11
D0	100764568	6839	SUV39H1
D0	100767338	7167	TPI1
D0	100770615	7168	TPM1
D0	100750706	7516	XRCC2
D0	100689247	7555	CNBP
D0	100772974	7764	ZNF217
D0	100753569	8560	DEGS1
D0	100770968	9055	PRC1
D0	100770789	9260	PDLIM7
D0	100763533	9314	KLF4
D0	100760726	9442	MED27
D0	100758427	9446	GSTO1
D0	100772476	9582	APOBEC3B
D0	100754995	9693	RAPGEF2
D0	100767877	9759	HDAC4
D0	100755621	9768	PCLAF
D0	100768908	9837	GINS1
D0	100756533	10036	CHAF1A
D0	100764381	10054	UBA2
D0	100758564	10253	SPRY2
D0	100755727	10474	TADA3
D0	100757601	11083	DIDO1
D0	100760178	11140	CDC37
D0	100757066	11201	POLI
D0	100765193	22978	NT5C2
D0	100769142	23435	TARDBP
D0	100761538	25942	SIN3A
D0	100765637	29072	SETD2
D0	100760720	29097	CNIH4
D0	100769851	51099	ABHD5
D0	100772979	51605	TRMT6
D0	100758038	51659	GINS2
D0	100757098	54205	CYCS
D0	100758416	54476	RNF216
D0	100764269	54606	DDX56
D0	100768167	54962	TIPIN
D0	100758246	55654	TMEM127
D0	100753944	55693	KDM4D
D0	100768801	55829	SELENOS
D0	100771065	55920	RCC2
D0	100767926	56655	POLE4
D0	100761063	64710	NUCKS1
D0	100768427	64919	BCL11B
D0	100763518	65057	ACD
D0	100769832	79077	DCTPP1
D0	100751484	79755	ZNF750
D0	100754573	80233	FAAP100
D0	100758747	83593	RASSF5
D0	100764217	83932	SPRTN
D0	100760335	84695	LOXL3
D0	100767178	112950	MED8
D0	100764146	144715	RAD9B
D0	100753453	346389	MACC1
D0	100752569	387357	THEMIS
D0	100775000	493869	GPX8
C12	100750969	191	AHCY
C12	100769087	292	SLC25A5
C12	100762210	1676	DFFA
C12	100689028	1719	DHFR
C12	100689276	1915	EEF1A1
C12	100756103	2237	FEN1
C12	100736557	2597	GAPDH
C12	100764163	2752	GLUL
C12	100765235	2879	GPX4
C12	100757539	3014	H2AX
C12	100769923	3178	HNRNPA1
C12	100767942	3192	HNRNPU
C12	100689473	3329	HSPD1
C12	100750469	3606	IL18
C12	100767785	3621	ING1
C12	100764237	4170	MCL1
C12	100761485	4507	MTAP
C12	100773712	5277	PIGA
C12	100769490	5478	PPIA
C12	100770250	6125	RPL5
C12	100756991	6364	CCL20
C12	100764859	7031	TFF1
C12	100760883	8451	CUL4A
C12	100756666	8824	CES2
C12	100760726	9442	MED27
C12	100766982	27173	SLC39A1
C12	100766150	79053	ALG8
C12	100751772	79718	TBL1XR1
C12	100773675	79728	PALB2
C12	100769598	259282	BOD1L1
C12	100758461	375612	LHFPL3
ST12	100751272	231	AKR1B1
ST12	100689028	1719	DHFR
ST12	100764268	2165	F13B
ST12	100736557	2597	GAPDH
ST12	100768069	2967	GTF2H3
ST12	100757430	3021	H3-3B
ST12	100689473	3329	HSPD1
ST12	103160615	3456	IFNB1
ST12	100767785	3621	ING1
ST12	100764237	4170	MCL1
ST12	100774990	5155	PDGFB
ST12	100769490	5478	PPIA
ST12	100756792	5879	RAC1
ST12	100758037	6188	RPS3
ST12	100753707	6194	RPS6
ST12	100758279	6590	SLPI
ST12	100689105	6613	SUMO2
ST12	100751375	7405	UVRAG
ST12	100767733	7852	CXCR4
ST12	100763533	9314	KLF4
ST12	100754437	10291	SF3A1
ST12	100760884	11065	UBE2C
ST12	100763935	11261	CHP1
ST12	100756080	23012	STK38L
ST12	100757098	54205	CYCS
ST12	100769811	54790	TET2
ST12	100768801	55829	SELENOS
ST12	100756228	55850	USE1
ST12	103161765	83872	HMCN1

## Sheet: S15
Table S15: Day 0 biogenesis frequencies. Full details of eccDNA biogenesis frequencies shown chronologically (left) and ranked (right).
Chronological				Ranked
Chr	Start	End	Value	Chr	Start	End	Value	Z Score
1_1	0	500000	4	10	25500000	26000000	187	22.0943
1_1	500000	1000000	8	9	15000000	15500000	176	20.7239
1_1	1000000	1500000	9	9	15500000	16000000	170	19.9765
1_1	1500000	2000000	12	9	14500000	15000000	160	18.7307
1_1	2000000	2500000	13	7	134000000	134359064	138	15.9899
1_1	2500000	3000000	10	9	14000000	14500000	104	11.7542
1_1	3000000	3500000	7	2	41000000	41500000	91	10.1347
1_1	3500000	4000000	10	10	21000000	21500000	81	8.88892
1_1	4000000	4500000	8	10	25000000	25500000	76	8.26602
1_1	4500000	5000000	15	X	106500000	107000000	73	7.89228
1_1	5000000	5500000	4	9	13500000	14000000	71	7.64312
1_1	5500000	6000000	5	10	23500000	24000000	63	6.64649
1_1	6000000	6500000	6	9	17500000	18000000	60	6.27275
1_1	6500000	7000000	7	9	16000000	16500000	59	6.14818
1_1	7000000	7500000	4	9	16500000	17000000	55	5.64986
1_1	7500000	8000000	8	1_1	92500000	93000000	52	5.27612
1_1	8000000	8500000	10	10	24000000	24500000	46	4.52865
1_1	8500000	9000000	8	1_2	195000000	195500000	44	4.27949
1_1	9000000	9500000	2	9	13000000	13500000	44	4.27949
1_1	9500000	10000000	7	3	42000000	42500000	41	3.90575
1_1	10000000	10500000	15	1_2	195500000	196000000	40	3.78117
1_1	10500000	11000000	9	10	20500000	21000000	39	3.65659
1_1	11000000	11500000	7	8	58500000	59000000	38	3.53201
1_1	11500000	12000000	8	3	41500000	42000000	37	3.40744
1_1	12000000	12500000	2	2	34500000	35000000	36	3.28286
1_1	12500000	13000000	4	8	60500000	61000000	36	3.28286
1_1	13000000	13500000	13	9	25500000	26000000	36	3.28286
1_1	13500000	14000000	11	1_2	32000000	32500000	35	3.15828
1_1	14000000	14500000	7	1_2	61500000	62000000	35	3.15828
1_1	14500000	15000000	9	6	65500000	66000000	35	3.15828
1_1	15000000	15500000	6	8	61000000	61500000	35	3.15828
1_1	15500000	16000000	13	10	22500000	23000000	34	3.0337
1_1	16000000	16500000	6	3	41000000	41500000	34	3.0337
1_1	16500000	17000000	4	10	24500000	25000000	33	2.90912
1_1	17000000	17500000	4	10	18500000	19000000	32	2.78454
1_1	17500000	18000000	7	4	9500000	10000000	32	2.78454
1_1	18000000	18500000	12	3	94500000	95000000	31	2.65996
1_1	18500000	19000000	8	10	20000000	20500000	30	2.53538
1_1	19000000	19500000	11	10	22000000	22500000	30	2.53538
1_1	19500000	20000000	3	1_2	196000000	196500000	30	2.53538
1_1	20000000	20500000	3	4	131000000	131500000	30	2.53538
1_1	20500000	21000000	2	10	21500000	22000000	29	2.4108
1_1	21000000	21500000	15	1_1	216000000	216500000	29	2.4108
1_1	21500000	22000000	10	1_2	158000000	158500000	29	2.4108
1_1	22000000	22500000	11	3	236500000	237000000	29	2.4108
1_1	22500000	23000000	9	4	10000000	10500000	29	2.4108
1_1	23000000	23500000	11	3	45000000	45500000	28	2.28622
1_1	23500000	24000000	8	4	11000000	11500000	28	2.28622
1_1	24000000	24500000	8	3	40500000	41000000	27	2.16164
1_1	24500000	25000000	17	4	1000000	1500000	27	2.16164
1_1	25000000	25500000	10	4	72500000	73000000	27	2.16164
1_1	25500000	26000000	6	10	23000000	23500000	26	2.03707
1_1	26000000	26500000	6	3	48000000	48500000	26	2.03707
1_1	26500000	27000000	4	3	48500000	49000000	26	2.03707
1_1	27000000	27500000	12	3	236000000	236500000	26	2.03707
1_1	27500000	28000000	10	4	7000000	7500000	26	2.03707
1_1	28000000	28500000	20	5	126000000	126500000	26	2.03707
1_1	28500000	29000000	12	10	19000000	19500000	25	1.91249
1_1	29000000	29500000	5	1_1	121500000	122000000	25	1.91249
1_1	29500000	30000000	7	1_1	228000000	228500000	25	1.91249
1_1	30000000	30500000	11	2	278500000	279000000	25	1.91249
1_1	30500000	31000000	6	2	454500000	455000000	25	1.91249
1_1	31000000	31500000	10	4	14000000	14500000	25	1.91249
1_1	31500000	32000000	6	4	17000000	17500000	25	1.91249
1_1	32000000	32500000	19	4	127500000	128000000	25	1.91249
1_1	32500000	33000000	10	4	135000000	135500000	25	1.91249
1_1	33000000	33500000	13	4	161500000	162000000	25	1.91249
1_1	33500000	34000000	13	5	17500000	18000000	25	1.91249
1_1	34000000	34500000	7	5	38000000	38500000	25	1.91249
1_1	34500000	35000000	3	1_1	91000000	91500000	24	1.78791
1_1	35000000	35500000	12	1_1	126500000	127000000	24	1.78791
1_1	35500000	36000000	16	2	279500000	280000000	24	1.78791
1_1	36000000	36500000	9	3	40000000	40500000	24	1.78791
1_1	36500000	37000000	13	3	42500000	43000000	24	1.78791
1_1	37000000	37500000	11	3	106500000	107000000	24	1.78791
1_1	37500000	38000000	15	3	112500000	113000000	24	1.78791
1_1	38000000	38500000	10	3	114500000	115000000	24	1.78791
1_1	38500000	39000000	8	3	150000000	150500000	24	1.78791
1_1	39000000	39500000	8	3	168000000	168500000	24	1.78791
1_1	39500000	40000000	6	3	187500000	188000000	24	1.78791
1_1	40000000	40500000	6	3	231000000	231500000	24	1.78791
1_1	40500000	41000000	8	4	11500000	12000000	24	1.78791
1_1	41000000	41500000	8	1_1	123000000	123500000	23	1.66333
1_1	41500000	42000000	9	2	4500000	5000000	23	1.66333
1_1	42000000	42500000	7	2	6000000	6500000	23	1.66333
1_1	42500000	43000000	4	2	420000000	420500000	23	1.66333
1_1	43000000	43500000	5	3	31500000	32000000	23	1.66333
1_1	43500000	44000000	2	3	35000000	35500000	23	1.66333
1_1	44000000	44500000	4	3	106000000	106500000	23	1.66333
1_1	44500000	45000000	8	3	137500000	138000000	23	1.66333
1_1	45000000	45500000	4	3	190500000	191000000	23	1.66333
1_1	45500000	46000000	3	3	191000000	191500000	23	1.66333
1_1	46000000	46500000	7	3	252500000	253000000	23	1.66333
1_1	46500000	47000000	6	4	18000000	18500000	23	1.66333
1_1	47000000	47500000	7	4	53500000	54000000	23	1.66333
1_1	47500000	48000000	11	4	119000000	119500000	23	1.66333
1_1	48000000	48500000	11	4	156000000	156500000	23	1.66333
1_1	48500000	49000000	11	4	202000000	202500000	23	1.66333
1_1	49000000	49500000	12	5	15000000	15500000	23	1.66333
1_1	49500000	50000000	10	5	154500000	155000000	23	1.66333
1_1	50000000	50500000	9	6	8000000	8500000	23	1.66333
1_1	50500000	51000000	7	6	15000000	15500000	23	1.66333
1_1	51000000	51500000	3	6	23500000	24000000	23	1.66333
1_1	51500000	52000000	8	9	11500000	12000000	23	1.66333
1_1	52000000	52500000	7	9	17000000	17500000	23	1.66333
1_1	52500000	53000000	8	1_1	93000000	93500000	22	1.53875
1_1	53000000	53500000	6	1_1	121000000	121500000	22	1.53875
1_1	53500000	54000000	1	1_2	83000000	83500000	22	1.53875
1_1	54000000	54500000	7	2	339000000	339500000	22	1.53875
1_1	54500000	55000000	7	2	440000000	440500000	22	1.53875
1_1	55000000	55500000	12	3	25000000	25500000	22	1.53875
1_1	55500000	56000000	14	3	28500000	29000000	22	1.53875
1_1	56000000	56500000	9	3	38000000	38500000	22	1.53875
1_1	56500000	57000000	9	3	49500000	50000000	22	1.53875
1_1	57000000	57500000	14	3	115000000	115500000	22	1.53875
1_1	57500000	58000000	1	3	157500000	158000000	22	1.53875
1_1	58000000	58500000	5	3	159000000	159500000	22	1.53875
1_1	58500000	59000000	11	3	175000000	175500000	22	1.53875
1_1	59000000	59500000	10	4	7500000	8000000	22	1.53875
1_1	59500000	60000000	9	4	128000000	128500000	22	1.53875
1_1	60000000	60500000	12	4	131500000	132000000	22	1.53875
1_1	60500000	61000000	10	4	175500000	176000000	22	1.53875
1_1	61000000	61500000	16	5	15500000	16000000	22	1.53875
1_1	61500000	62000000	6	6	73000000	73500000	22	1.53875
1_1	62000000	62500000	6	6	114000000	114500000	22	1.53875
1_1	62500000	63000000	4	1_1	189000000	189500000	21	1.41417
1_1	63000000	63500000	7	1_1	219500000	220000000	21	1.41417
1_1	63500000	64000000	5	1_1	239500000	240000000	21	1.41417
1_1	64000000	64500000	10	1_2	93000000	93500000	21	1.41417
1_1	64500000	65000000	6	2	279000000	279500000	21	1.41417
1_1	65000000	65500000	2	2	318500000	319000000	21	1.41417
1_1	65500000	66000000	10	2	397000000	397500000	21	1.41417
1_1	66000000	66500000	2	3	18500000	19000000	21	1.41417
1_1	66500000	67000000	6	3	19500000	20000000	21	1.41417
1_1	67000000	67500000	7	3	33500000	34000000	21	1.41417
1_1	67500000	68000000	5	3	35500000	36000000	21	1.41417
1_1	68000000	68500000	8	3	112000000	112500000	21	1.41417
1_1	68500000	69000000	2	3	117000000	117500000	21	1.41417
1_1	69000000	69500000	8	3	182500000	183000000	21	1.41417
1_1	69500000	70000000	2	4	3500000	4000000	21	1.41417
1_1	70000000	70500000	7	4	10500000	11000000	21	1.41417
1_1	70500000	71000000	5	4	81500000	82000000	21	1.41417
1_1	71000000	71500000	4	4	116500000	117000000	21	1.41417
1_1	71500000	72000000	8	4	162500000	163000000	21	1.41417
1_1	72000000	72500000	7	4	166500000	167000000	21	1.41417
1_1	72500000	73000000	3	4	189500000	190000000	21	1.41417
1_1	73000000	73500000	7	5	14500000	15000000	21	1.41417
1_1	73500000	74000000	5	5	41000000	41500000	21	1.41417
1_1	74000000	74500000	9	6	99500000	100000000	21	1.41417
1_1	74500000	75000000	7	6	109500000	110000000	21	1.41417
1_1	75000000	75500000	14	7	90000000	90500000	21	1.41417
1_1	75500000	76000000	5	8	59500000	60000000	21	1.41417
1_1	76000000	76500000	8	1_1	28000000	28500000	20	1.28959
1_1	76500000	77000000	7	1_1	89500000	90000000	20	1.28959
1_1	77000000	77500000	4	1_1	135500000	136000000	20	1.28959
1_1	77500000	78000000	9	1_1	184000000	184500000	20	1.28959
1_1	78000000	78500000	1	1_1	185500000	186000000	20	1.28959
1_1	78500000	79000000	4	1_1	193000000	193500000	20	1.28959
1_1	79000000	79500000	5	1_1	195500000	196000000	20	1.28959
1_1	79500000	80000000	5	1_1	218500000	219000000	20	1.28959
1_1	80000000	80500000	4	1_1	262000000	262500000	20	1.28959
1_1	80500000	81000000	9	1_2	76500000	77000000	20	1.28959
1_1	81000000	81500000	3	1_2	221000000	221500000	20	1.28959
1_1	81500000	82000000	3	2	13500000	14000000	20	1.28959
1_1	82000000	82500000	3	2	49000000	49500000	20	1.28959
1_1	82500000	83000000	9	2	58500000	59000000	20	1.28959
1_1	83000000	83500000	1	2	75500000	76000000	20	1.28959
1_1	83500000	84000000	7	2	178500000	179000000	20	1.28959
1_1	84000000	84500000	2	2	284000000	284500000	20	1.28959
1_1	84500000	85000000	2	2	450000000	450500000	20	1.28959
1_1	85000000	85500000	9	3	26500000	27000000	20	1.28959
1_1	85500000	86000000	10	3	47500000	48000000	20	1.28959
1_1	86000000	86500000	10	3	66000000	66500000	20	1.28959
1_1	86500000	87000000	11	3	98500000	99000000	20	1.28959
1_1	87000000	87500000	3	3	102500000	103000000	20	1.28959
1_1	87500000	88000000	3	3	114000000	114500000	20	1.28959
1_1	88000000	88500000	5	3	127000000	127500000	20	1.28959
1_1	88500000	89000000	5	3	235500000	236000000	20	1.28959
1_1	89000000	89500000	16	4	3000000	3500000	20	1.28959
1_1	89500000	90000000	20	4	8500000	9000000	20	1.28959
1_1	90000000	90500000	19	4	144500000	145000000	20	1.28959
1_1	90500000	91000000	17	4	145500000	146000000	20	1.28959
1_1	91000000	91500000	24	4	163500000	164000000	20	1.28959
1_1	91500000	92000000	5	4	182500000	183000000	20	1.28959
1_1	92000000	92500000	10	4	230500000	231000000	20	1.28959
1_1	92500000	93000000	52	5	26000000	26500000	20	1.28959
1_1	93000000	93500000	22	5	28500000	29000000	20	1.28959
1_1	93500000	94000000	11	5	63000000	63500000	20	1.28959
1_1	94000000	94500000	13	5	89000000	89500000	20	1.28959
1_1	94500000	95000000	18	5	153500000	154000000	20	1.28959
1_1	95000000	95500000	9	5	166000000	166500000	20	1.28959
1_1	95500000	96000000	18	6	31000000	31500000	20	1.28959
1_1	96000000	96500000	8	6	48500000	49000000	20	1.28959
1_1	96500000	97000000	8	7	42500000	43000000	20	1.28959
1_1	97000000	97500000	4	7	98500000	99000000	20	1.28959
1_1	97500000	98000000	4	8	59000000	59500000	20	1.28959
1_1	98000000	98500000	11	1_1	32000000	32500000	19	1.16501
1_1	98500000	99000000	14	1_1	90000000	90500000	19	1.16501
1_1	99000000	99500000	10	1_1	182500000	183000000	19	1.16501
1_1	99500000	100000000	7	1_1	197000000	197500000	19	1.16501
1_1	100000000	100500000	9	1_1	208500000	209000000	19	1.16501
1_1	100500000	101000000	5	1_1	222500000	223000000	19	1.16501
1_1	101000000	101500000	4	1_2	51000000	51500000	19	1.16501
1_1	101500000	102000000	4	1_2	56000000	56500000	19	1.16501
1_1	102000000	102500000	8	1_2	201000000	201500000	19	1.16501
1_1	102500000	103000000	0	2	9500000	10000000	19	1.16501
1_1	103000000	103500000	2	2	23500000	24000000	19	1.16501
1_1	103500000	104000000	2	2	25500000	26000000	19	1.16501
1_1	104000000	104500000	3	2	39500000	40000000	19	1.16501
1_1	104500000	105000000	8	2	78000000	78500000	19	1.16501
1_1	105000000	105500000	2	2	81000000	81500000	19	1.16501
1_1	105500000	106000000	1	2	84500000	85000000	19	1.16501
1_1	106000000	106500000	6	2	451000000	451500000	19	1.16501
1_1	106500000	107000000	3	3	8500000	9000000	19	1.16501
1_1	107000000	107500000	12	3	23500000	24000000	19	1.16501
1_1	107500000	108000000	14	3	27500000	28000000	19	1.16501
1_1	108000000	108500000	13	3	28000000	28500000	19	1.16501
1_1	108500000	109000000	12	3	39500000	40000000	19	1.16501
1_1	109000000	109500000	16	3	43000000	43500000	19	1.16501
1_1	109500000	110000000	6	3	44000000	44500000	19	1.16501
1_1	110000000	110500000	4	3	45500000	46000000	19	1.16501
1_1	110500000	111000000	6	3	46000000	46500000	19	1.16501
1_1	111000000	111500000	12	3	65000000	65500000	19	1.16501
1_1	111500000	112000000	10	3	75000000	75500000	19	1.16501
1_1	112000000	112500000	7	3	83000000	83500000	19	1.16501
1_1	112500000	113000000	8	3	116000000	116500000	19	1.16501
1_1	113000000	113500000	8	3	133500000	134000000	19	1.16501
1_1	113500000	114000000	11	3	146500000	147000000	19	1.16501
1_1	114000000	114500000	7	3	175500000	176000000	19	1.16501
1_1	114500000	115000000	8	3	190000000	190500000	19	1.16501
1_1	115000000	115500000	18	4	19500000	20000000	19	1.16501
1_1	115500000	116000000	13	4	33000000	33500000	19	1.16501
1_1	116000000	116500000	7	4	46000000	46500000	19	1.16501
1_1	116500000	117000000	6	4	56500000	57000000	19	1.16501
1_1	117000000	117500000	13	4	83000000	83500000	19	1.16501
1_1	117500000	118000000	10	4	95500000	96000000	19	1.16501
1_1	118000000	118500000	6	4	102000000	102500000	19	1.16501
1_1	118500000	119000000	6	4	136500000	137000000	19	1.16501
1_1	119000000	119500000	5	4	138000000	138500000	19	1.16501
1_1	119500000	120000000	18	4	153000000	153500000	19	1.16501
1_1	120000000	120500000	10	4	154000000	154500000	19	1.16501
1_1	120500000	121000000	15	4	165500000	166000000	19	1.16501
1_1	121000000	121500000	22	4	168000000	168500000	19	1.16501
1_1	121500000	122000000	25	4	185000000	185500000	19	1.16501
1_1	122000000	122500000	13	4	186000000	186500000	19	1.16501
1_1	122500000	123000000	14	4	195500000	196000000	19	1.16501
1_1	123000000	123500000	23	4	223500000	224000000	19	1.16501
1_1	123500000	124000000	5	4	229000000	229500000	19	1.16501
1_1	124000000	124500000	8	5	39000000	39500000	19	1.16501
1_1	124500000	125000000	6	5	86000000	86500000	19	1.16501
1_1	125000000	125500000	9	5	114000000	114500000	19	1.16501
1_1	125500000	126000000	11	6	86000000	86500000	19	1.16501
1_1	126000000	126500000	17	6	90000000	90500000	19	1.16501
1_1	126500000	127000000	24	6	94500000	95000000	19	1.16501
1_1	127000000	127500000	7	6	99000000	99500000	19	1.16501
1_1	127500000	128000000	6	6	100500000	101000000	19	1.16501
1_1	128000000	128500000	8	6	145000000	145500000	19	1.16501
1_1	128500000	129000000	10	7	97000000	97500000	19	1.16501
1_1	129000000	129500000	8	8	30000000	30500000	19	1.16501
1_1	129500000	130000000	9	8	32500000	33000000	19	1.16501
1_1	130000000	130500000	8	8	60000000	60500000	19	1.16501
1_1	130500000	131000000	5	8	62000000	62500000	19	1.16501
1_1	131000000	131500000	9	8	74500000	75000000	19	1.16501
1_1	131500000	132000000	8	10	13000000	13500000	18	1.04043
1_1	132000000	132500000	9	1_1	94500000	95000000	18	1.04043
1_1	132500000	133000000	7	1_1	95500000	96000000	18	1.04043
1_1	133000000	133500000	8	1_1	115000000	115500000	18	1.04043
1_1	133500000	134000000	7	1_1	119500000	120000000	18	1.04043
1_1	134000000	134500000	3	1_1	216500000	217000000	18	1.04043
1_1	134500000	135000000	4	1_1	236500000	237000000	18	1.04043
1_1	135000000	135500000	11	1_2	89500000	90000000	18	1.04043
1_1	135500000	136000000	20	1_2	229000000	229500000	18	1.04043
1_1	136000000	136500000	12	2	14500000	15000000	18	1.04043
1_1	136500000	137000000	6	2	45500000	46000000	18	1.04043
1_1	137000000	137500000	6	2	61000000	61500000	18	1.04043
1_1	137500000	138000000	5	2	241500000	242000000	18	1.04043
1_1	138000000	138500000	15	2	246500000	247000000	18	1.04043
1_1	138500000	139000000	11	2	322500000	323000000	18	1.04043
1_1	139000000	139500000	17	2	331000000	331500000	18	1.04043
1_1	139500000	140000000	10	2	408500000	409000000	18	1.04043
1_1	140000000	140500000	7	2	424500000	425000000	18	1.04043
1_1	140500000	141000000	7	3	17500000	18000000	18	1.04043
1_1	141000000	141500000	11	3	24000000	24500000	18	1.04043
1_1	141500000	142000000	7	3	25500000	26000000	18	1.04043
1_1	142000000	142500000	8	3	39000000	39500000	18	1.04043
1_1	142500000	143000000	5	3	82000000	82500000	18	1.04043
1_1	143000000	143500000	7	3	82500000	83000000	18	1.04043
1_1	143500000	144000000	6	3	86000000	86500000	18	1.04043
1_1	144000000	144500000	9	3	95500000	96000000	18	1.04043
1_1	144500000	145000000	5	3	104500000	105000000	18	1.04043
1_1	145000000	145500000	7	3	109500000	110000000	18	1.04043
1_1	145500000	146000000	4	3	110500000	111000000	18	1.04043
1_1	146000000	146500000	17	3	121500000	122000000	18	1.04043
1_1	146500000	147000000	8	3	122500000	123000000	18	1.04043
1_1	147000000	147500000	12	3	153500000	154000000	18	1.04043
1_1	147500000	148000000	2	3	157000000	157500000	18	1.04043
1_1	148000000	148500000	4	3	163500000	164000000	18	1.04043
1_1	148500000	149000000	7	3	170000000	170500000	18	1.04043
1_1	149000000	149500000	5	3	177000000	177500000	18	1.04043
1_1	149500000	150000000	5	3	179500000	180000000	18	1.04043
1_1	150000000	150500000	10	3	183500000	184000000	18	1.04043
1_1	150500000	151000000	5	3	189500000	190000000	18	1.04043
1_1	151000000	151500000	9	3	195500000	196000000	18	1.04043
1_1	151500000	152000000	4	4	0	500000	18	1.04043
1_1	152000000	152500000	14	4	13000000	13500000	18	1.04043
1_1	152500000	153000000	12	4	49500000	50000000	18	1.04043
1_1	153000000	153500000	17	4	63500000	64000000	18	1.04043
1_1	153500000	154000000	5	4	141500000	142000000	18	1.04043
1_1	154000000	154500000	14	4	152000000	152500000	18	1.04043
1_1	154500000	155000000	9	4	154500000	155000000	18	1.04043
1_1	155000000	155500000	7	4	157000000	157500000	18	1.04043
1_1	155500000	156000000	3	4	158000000	158500000	18	1.04043
1_1	156000000	156500000	3	4	163000000	163500000	18	1.04043
1_1	156500000	157000000	3	4	183500000	184000000	18	1.04043
1_1	157000000	157500000	11	4	186500000	187000000	18	1.04043
1_1	157500000	158000000	11	5	16000000	16500000	18	1.04043
1_1	158000000	158500000	7	5	17000000	17500000	18	1.04043
1_1	158500000	159000000	11	5	22500000	23000000	18	1.04043
1_1	159000000	159500000	17	5	27500000	28000000	18	1.04043
1_1	159500000	160000000	12	5	39500000	40000000	18	1.04043
1_1	160000000	160500000	6	5	50000000	50500000	18	1.04043
1_1	160500000	161000000	5	5	60000000	60500000	18	1.04043
1_1	161000000	161500000	6	5	70500000	71000000	18	1.04043
1_1	161500000	162000000	11	5	77500000	78000000	18	1.04043
1_1	162000000	162500000	8	5	97000000	97500000	18	1.04043
1_1	162500000	163000000	14	5	123000000	123500000	18	1.04043
1_1	163000000	163500000	9	6	2000000	2500000	18	1.04043
1_1	163500000	164000000	6	6	30000000	30500000	18	1.04043
1_1	164000000	164500000	7	6	55500000	56000000	18	1.04043
1_1	164500000	165000000	4	6	111500000	112000000	18	1.04043
1_1	165000000	165500000	4	6	135500000	136000000	18	1.04043
1_1	165500000	166000000	7	7	13000000	13500000	18	1.04043
1_1	166000000	166500000	13	7	37500000	38000000	18	1.04043
1_1	166500000	167000000	5	7	89000000	89500000	18	1.04043
1_1	167000000	167500000	1	7	103000000	103500000	18	1.04043
1_1	167500000	168000000	5	7	108500000	109000000	18	1.04043
1_1	168000000	168500000	6	8	61500000	62000000	18	1.04043
1_1	168500000	169000000	4	9	20500000	21000000	18	1.04043
1_1	169000000	169500000	14	10	26000000	26500000	17	0.915854
1_1	169500000	170000000	7	1_1	24500000	25000000	17	0.915854
1_1	170000000	170500000	7	1_1	90500000	91000000	17	0.915854
1_1	170500000	171000000	4	1_1	126000000	126500000	17	0.915854
1_1	171000000	171500000	14	1_1	139000000	139500000	17	0.915854
1_1	171500000	172000000	10	1_1	146000000	146500000	17	0.915854
1_1	172000000	172500000	6	1_1	153000000	153500000	17	0.915854
1_1	172500000	173000000	7	1_1	159000000	159500000	17	0.915854
1_1	173000000	173500000	7	1_1	191500000	192000000	17	0.915854
1_1	173500000	174000000	5	1_1	192000000	192500000	17	0.915854
1_1	174000000	174500000	12	1_1	205000000	205500000	17	0.915854
1_1	174500000	175000000	9	1_1	244000000	244500000	17	0.915854
1_1	175000000	175500000	6	1_2	38500000	39000000	17	0.915854
1_1	175500000	176000000	6	1_2	71500000	72000000	17	0.915854
1_1	176000000	176500000	13	1_2	78000000	78500000	17	0.915854
1_1	176500000	177000000	9	1_2	87000000	87500000	17	0.915854
1_1	177000000	177500000	11	1_2	100500000	101000000	17	0.915854
1_1	177500000	178000000	5	1_2	208500000	209000000	17	0.915854
1_1	178000000	178500000	5	2	3000000	3500000	17	0.915854
1_1	178500000	179000000	5	2	21000000	21500000	17	0.915854
1_1	179000000	179500000	9	2	27000000	27500000	17	0.915854
1_1	179500000	180000000	13	2	33500000	34000000	17	0.915854
1_1	180000000	180500000	7	2	40500000	41000000	17	0.915854
1_1	180500000	181000000	15	2	47000000	47500000	17	0.915854
1_1	181000000	181500000	7	2	50000000	50500000	17	0.915854
1_1	181500000	182000000	10	2	60000000	60500000	17	0.915854
1_1	182000000	182500000	10	2	88500000	89000000	17	0.915854
1_1	182500000	183000000	19	2	90000000	90500000	17	0.915854
1_1	183000000	183500000	15	2	219500000	220000000	17	0.915854
1_1	183500000	184000000	11	2	226000000	226500000	17	0.915854
1_1	184000000	184500000	20	2	242500000	243000000	17	0.915854
1_1	184500000	185000000	5	2	244000000	244500000	17	0.915854
1_1	185000000	185500000	10	2	258000000	258500000	17	0.915854
1_1	185500000	186000000	20	2	287000000	287500000	17	0.915854
1_1	186000000	186500000	7	2	319000000	319500000	17	0.915854
1_1	186500000	187000000	15	2	343000000	343500000	17	0.915854
1_1	187000000	187500000	11	2	451500000	452000000	17	0.915854
1_1	187500000	188000000	10	2	458000000	458500000	17	0.915854
1_1	188000000	188500000	16	3	20000000	20500000	17	0.915854
1_1	188500000	189000000	9	3	22000000	22500000	17	0.915854
1_1	189000000	189500000	21	3	44500000	45000000	17	0.915854
1_1	189500000	190000000	14	3	50500000	51000000	17	0.915854
1_1	190000000	190500000	10	3	76500000	77000000	17	0.915854
1_1	190500000	191000000	3	3	80500000	81000000	17	0.915854
1_1	191000000	191500000	9	3	101500000	102000000	17	0.915854
1_1	191500000	192000000	17	3	109000000	109500000	17	0.915854
1_1	192000000	192500000	17	3	116500000	117000000	17	0.915854
1_1	192500000	193000000	4	3	132000000	132500000	17	0.915854
1_1	193000000	193500000	20	3	134500000	135000000	17	0.915854
1_1	193500000	194000000	12	3	138500000	139000000	17	0.915854
1_1	194000000	194500000	15	3	144500000	145000000	17	0.915854
1_1	194500000	195000000	5	3	145500000	146000000	17	0.915854
1_1	195000000	195500000	7	3	147000000	147500000	17	0.915854
1_1	195500000	196000000	20	3	149500000	150000000	17	0.915854
1_1	196000000	196500000	10	3	153000000	153500000	17	0.915854
1_1	196500000	197000000	13	3	180000000	180500000	17	0.915854
1_1	197000000	197500000	19	3	180500000	181000000	17	0.915854
1_1	197500000	198000000	10	3	228500000	229000000	17	0.915854
1_1	198000000	198500000	9	3	235000000	235500000	17	0.915854
1_1	198500000	199000000	15	3	238000000	238500000	17	0.915854
1_1	199000000	199500000	9	3	243000000	243500000	17	0.915854
1_1	199500000	200000000	6	3	254500000	255000000	17	0.915854
1_1	200000000	200500000	11	3	256500000	257000000	17	0.915854
1_1	200500000	201000000	5	3	265000000	265500000	17	0.915854
1_1	201000000	201500000	9	4	4500000	5000000	17	0.915854
1_1	201500000	202000000	12	4	5500000	6000000	17	0.915854
1_1	202000000	202500000	16	4	16500000	17000000	17	0.915854
1_1	202500000	203000000	12	4	17500000	18000000	17	0.915854
1_1	203000000	203500000	5	4	19000000	19500000	17	0.915854
1_1	203500000	204000000	11	4	34500000	35000000	17	0.915854
1_1	204000000	204500000	7	4	35500000	36000000	17	0.915854
1_1	204500000	205000000	11	4	42000000	42500000	17	0.915854
1_1	205000000	205500000	17	4	45000000	45500000	17	0.915854
1_1	205500000	206000000	8	4	51500000	52000000	17	0.915854
1_1	206000000	206500000	15	4	90500000	91000000	17	0.915854
1_1	206500000	207000000	8	4	155000000	155500000	17	0.915854
1_1	207000000	207500000	9	4	159000000	159500000	17	0.915854
1_1	207500000	208000000	11	4	159500000	160000000	17	0.915854
1_1	208000000	208500000	9	4	169000000	169500000	17	0.915854
1_1	208500000	209000000	19	4	176500000	177000000	17	0.915854
1_1	209000000	209500000	14	4	191000000	191500000	17	0.915854
1_1	209500000	210000000	15	4	215000000	215500000	17	0.915854
1_1	210000000	210500000	13	4	216500000	217000000	17	0.915854
1_1	210500000	211000000	9	5	4000000	4500000	17	0.915854
1_1	211000000	211500000	10	5	13000000	13500000	17	0.915854
1_1	211500000	212000000	9	5	35500000	36000000	17	0.915854
1_1	212000000	212500000	9	5	46500000	47000000	17	0.915854
1_1	212500000	213000000	12	5	59500000	60000000	17	0.915854
1_1	213000000	213500000	9	5	65500000	66000000	17	0.915854
1_1	213500000	214000000	13	5	70000000	70500000	17	0.915854
1_1	214000000	214500000	10	5	83000000	83500000	17	0.915854
1_1	214500000	215000000	12	5	84500000	85000000	17	0.915854
1_1	215000000	215500000	7	5	92000000	92500000	17	0.915854
1_1	215500000	216000000	10	5	127500000	128000000	17	0.915854
1_1	216000000	216500000	29	5	183000000	183500000	17	0.915854
1_1	216500000	217000000	18	6	8500000	9000000	17	0.915854
1_1	217000000	217500000	14	6	13500000	14000000	17	0.915854
1_1	217500000	218000000	11	6	19000000	19500000	17	0.915854
1_1	218000000	218500000	13	6	23000000	23500000	17	0.915854
1_1	218500000	219000000	20	6	39000000	39500000	17	0.915854
1_1	219000000	219500000	7	6	49000000	49500000	17	0.915854
1_1	219500000	220000000	21	6	52500000	53000000	17	0.915854
1_1	220000000	220500000	16	6	69000000	69500000	17	0.915854
1_1	220500000	221000000	11	6	74000000	74500000	17	0.915854
1_1	221000000	221500000	12	6	85500000	86000000	17	0.915854
1_1	221500000	222000000	9	6	98500000	99000000	17	0.915854
1_1	222000000	222500000	11	6	124000000	124500000	17	0.915854
1_1	222500000	223000000	19	6	146000000	146500000	17	0.915854
1_1	223000000	223500000	6	7	6000000	6500000	17	0.915854
1_1	223500000	224000000	4	7	94500000	95000000	17	0.915854
1_1	224000000	224500000	2	7	102500000	103000000	17	0.915854
1_1	224500000	225000000	7	8	76500000	77000000	17	0.915854
1_1	225000000	225500000	14	8	90500000	91000000	17	0.915854
1_1	225500000	226000000	5	10	15500000	16000000	16	0.791275
1_1	226000000	226500000	9	1_1	35500000	36000000	16	0.791275
1_1	226500000	227000000	10	1_1	61000000	61500000	16	0.791275
1_1	227000000	227500000	9	1_1	89000000	89500000	16	0.791275
1_1	227500000	228000000	8	1_1	109000000	109500000	16	0.791275
1_1	228000000	228500000	25	1_1	188000000	188500000	16	0.791275
1_1	228500000	229000000	7	1_1	202000000	202500000	16	0.791275
1_1	229000000	229500000	5	1_1	220000000	220500000	16	0.791275
1_1	229500000	230000000	7	1_1	234000000	234500000	16	0.791275
1_1	230000000	230500000	5	1_1	235500000	236000000	16	0.791275
1_1	230500000	231000000	15	1_1	250000000	250500000	16	0.791275
1_1	231000000	231500000	8	1_1	273000000	273500000	16	0.791275
1_1	231500000	232000000	4	1_2	31000000	31500000	16	0.791275
1_1	232000000	232500000	2	1_2	60500000	61000000	16	0.791275
1_1	232500000	233000000	8	1_2	77000000	77500000	16	0.791275
1_1	233000000	233500000	6	1_2	99000000	99500000	16	0.791275
1_1	233500000	234000000	12	1_2	111000000	111500000	16	0.791275
1_1	234000000	234500000	16	1_2	213000000	213500000	16	0.791275
1_1	234500000	235000000	13	1_2	220500000	221000000	16	0.791275
1_1	235000000	235500000	14	1_2	227000000	227500000	16	0.791275
1_1	235500000	236000000	16	2	28000000	28500000	16	0.791275
1_1	236000000	236500000	13	2	38000000	38500000	16	0.791275
1_1	236500000	237000000	18	2	96000000	96500000	16	0.791275
1_1	237000000	237500000	8	2	185500000	186000000	16	0.791275
1_1	237500000	238000000	12	2	234000000	234500000	16	0.791275
1_1	238000000	238500000	12	2	251500000	252000000	16	0.791275
1_1	238500000	239000000	10	2	252500000	253000000	16	0.791275
1_1	239000000	239500000	12	2	253500000	254000000	16	0.791275
1_1	239500000	240000000	21	2	271500000	272000000	16	0.791275
1_1	240000000	240500000	9	2	280000000	280500000	16	0.791275
1_1	240500000	241000000	15	2	282000000	282500000	16	0.791275
1_1	241000000	241500000	10	2	328500000	329000000	16	0.791275
1_1	241500000	242000000	10	2	329000000	329500000	16	0.791275
1_1	242000000	242500000	6	2	336500000	337000000	16	0.791275
1_1	242500000	243000000	13	2	360500000	361000000	16	0.791275
1_1	243000000	243500000	10	2	408000000	408500000	16	0.791275
1_1	243500000	244000000	7	2	411000000	411500000	16	0.791275
1_1	244000000	244500000	17	2	452000000	452500000	16	0.791275
1_1	244500000	245000000	14	2	455000000	455500000	16	0.791275
1_1	245000000	245500000	6	3	6500000	7000000	16	0.791275
1_1	245500000	246000000	4	3	15000000	15500000	16	0.791275
1_1	246000000	246500000	7	3	20500000	21000000	16	0.791275
1_1	246500000	247000000	5	3	29500000	30000000	16	0.791275
1_1	247000000	247500000	11	3	32500000	33000000	16	0.791275
1_1	247500000	248000000	7	3	37500000	38000000	16	0.791275
1_1	248000000	248500000	4	3	49000000	49500000	16	0.791275
1_1	248500000	249000000	5	3	70500000	71000000	16	0.791275
1_1	249000000	249500000	10	3	71500000	72000000	16	0.791275
1_1	249500000	250000000	3	3	77000000	77500000	16	0.791275
1_1	250000000	250500000	16	3	127500000	128000000	16	0.791275
1_1	250500000	251000000	9	3	143500000	144000000	16	0.791275
1_1	251000000	251500000	10	3	158000000	158500000	16	0.791275
1_1	251500000	252000000	2	3	164500000	165000000	16	0.791275
1_1	252000000	252500000	6	3	172000000	172500000	16	0.791275
1_1	252500000	253000000	9	3	181000000	181500000	16	0.791275
1_1	253000000	253500000	10	3	205500000	206000000	16	0.791275
1_1	253500000	254000000	9	3	208500000	209000000	16	0.791275
1_1	254000000	254500000	7	3	233000000	233500000	16	0.791275
1_1	254500000	255000000	9	3	237000000	237500000	16	0.791275
1_1	255000000	255500000	7	3	242000000	242500000	16	0.791275
1_1	255500000	256000000	6	4	2000000	2500000	16	0.791275
1_1	256000000	256500000	7	4	6500000	7000000	16	0.791275
1_1	256500000	257000000	5	4	16000000	16500000	16	0.791275
1_1	257000000	257500000	5	4	40500000	41000000	16	0.791275
1_1	257500000	258000000	5	4	45500000	46000000	16	0.791275
1_1	258000000	258500000	4	4	55000000	55500000	16	0.791275
1_1	258500000	259000000	10	4	64000000	64500000	16	0.791275
1_1	259000000	259500000	5	4	74500000	75000000	16	0.791275
1_1	259500000	260000000	6	4	79000000	79500000	16	0.791275
1_1	260000000	260500000	3	4	80000000	80500000	16	0.791275
1_1	260500000	261000000	9	4	109000000	109500000	16	0.791275
1_1	261000000	261500000	4	4	133500000	134000000	16	0.791275
1_1	261500000	262000000	4	4	160000000	160500000	16	0.791275
1_1	262000000	262500000	20	4	162000000	162500000	16	0.791275
1_1	262500000	263000000	8	4	166000000	166500000	16	0.791275
1_1	263000000	263500000	9	4	167000000	167500000	16	0.791275
1_1	263500000	264000000	11	4	168500000	169000000	16	0.791275
1_1	264000000	264500000	10	4	198000000	198500000	16	0.791275
1_1	264500000	265000000	10	4	201500000	202000000	16	0.791275
1_1	265000000	265500000	10	5	14000000	14500000	16	0.791275
1_1	265500000	266000000	11	5	16500000	17000000	16	0.791275
1_1	266000000	266500000	5	5	20000000	20500000	16	0.791275
1_1	266500000	267000000	6	5	21000000	21500000	16	0.791275
1_1	267000000	267500000	5	5	22000000	22500000	16	0.791275
1_1	267500000	268000000	10	5	62000000	62500000	16	0.791275
1_1	268000000	268500000	9	5	63500000	64000000	16	0.791275
1_1	268500000	269000000	4	5	71500000	72000000	16	0.791275
1_1	269000000	269500000	10	5	164000000	164500000	16	0.791275
1_1	269500000	270000000	3	6	16500000	17000000	16	0.791275
1_1	270000000	270500000	13	6	28500000	29000000	16	0.791275
1_1	270500000	271000000	6	6	84500000	85000000	16	0.791275
1_1	271000000	271500000	4	6	91000000	91500000	16	0.791275
1_1	271500000	272000000	4	6	98000000	98500000	16	0.791275
1_1	272000000	272500000	4	6	102000000	102500000	16	0.791275
1_1	272500000	273000000	3	6	107000000	107500000	16	0.791275
1_1	273000000	273500000	16	6	118500000	119000000	16	0.791275
1_1	273500000	274000000	8	6	120000000	120500000	16	0.791275
1_1	274000000	274500000	6	7	106000000	106500000	16	0.791275
1_1	274500000	275000000	13	8	6500000	7000000	16	0.791275
1_1	275000000	275500000	4	8	25500000	26000000	16	0.791275
1_1	275500000	275698159	2	8	44500000	45000000	16	0.791275
1_2	0	500000	6	8	46000000	46500000	16	0.791275
1_2	500000	1000000	5	8	63500000	64000000	16	0.791275
1_2	1000000	1500000	9	X	18500000	19000000	16	0.791275
1_2	1500000	2000000	12	X	49000000	49500000	16	0.791275
1_2	2000000	2500000	9	X	126000000	126500000	16	0.791275
1_2	2500000	3000000	5	10	19500000	20000000	15	0.666696
1_2	3000000	3500000	15	1_1	4500000	5000000	15	0.666696
1_2	3500000	4000000	1	1_1	10000000	10500000	15	0.666696
1_2	4000000	4500000	7	1_1	21000000	21500000	15	0.666696
1_2	4500000	5000000	5	1_1	37500000	38000000	15	0.666696
1_2	5000000	5500000	9	1_1	120500000	121000000	15	0.666696
1_2	5500000	6000000	3	1_1	138000000	138500000	15	0.666696
1_2	6000000	6500000	10	1_1	180500000	181000000	15	0.666696
1_2	6500000	7000000	13	1_1	183000000	183500000	15	0.666696
1_2	7000000	7500000	6	1_1	186500000	187000000	15	0.666696
1_2	7500000	8000000	15	1_1	194000000	194500000	15	0.666696
1_2	8000000	8500000	6	1_1	198500000	199000000	15	0.666696
1_2	8500000	9000000	13	1_1	206000000	206500000	15	0.666696
1_2	9000000	9500000	6	1_1	209500000	210000000	15	0.666696
1_2	9500000	10000000	6	1_1	230500000	231000000	15	0.666696
1_2	10000000	10500000	11	1_1	240500000	241000000	15	0.666696
1_2	10500000	11000000	6	1_2	3000000	3500000	15	0.666696
1_2	11000000	11500000	15	1_2	7500000	8000000	15	0.666696
1_2	11500000	12000000	11	1_2	11000000	11500000	15	0.666696
1_2	12000000	12500000	4	1_2	16000000	16500000	15	0.666696
1_2	12500000	13000000	6	1_2	37000000	37500000	15	0.666696
1_2	13000000	13500000	9	1_2	40500000	41000000	15	0.666696
1_2	13500000	14000000	13	1_2	43500000	44000000	15	0.666696
1_2	14000000	14500000	6	1_2	48000000	48500000	15	0.666696
1_2	14500000	15000000	8	1_2	58500000	59000000	15	0.666696
1_2	15000000	15500000	5	1_2	62000000	62500000	15	0.666696
1_2	15500000	16000000	8	1_2	72000000	72500000	15	0.666696
1_2	16000000	16500000	15	1_2	77500000	78000000	15	0.666696
1_2	16500000	17000000	9	1_2	85000000	85500000	15	0.666696
1_2	17000000	17500000	7	1_2	87500000	88000000	15	0.666696
1_2	17500000	18000000	4	1_2	101000000	101500000	15	0.666696
1_2	18000000	18500000	8	1_2	174000000	174500000	15	0.666696
1_2	18500000	19000000	4	1_2	269000000	269500000	15	0.666696
1_2	19000000	19500000	5	2	52500000	53000000	15	0.666696
1_2	19500000	20000000	5	2	76500000	77000000	15	0.666696
1_2	20000000	20500000	6	2	77500000	78000000	15	0.666696
1_2	20500000	21000000	6	2	86000000	86500000	15	0.666696
1_2	21000000	21500000	4	2	92000000	92500000	15	0.666696
1_2	21500000	22000000	9	2	187000000	187500000	15	0.666696
1_2	22000000	22500000	8	2	195500000	196000000	15	0.666696
1_2	22500000	23000000	10	2	229000000	229500000	15	0.666696
1_2	23000000	23500000	9	2	232500000	233000000	15	0.666696
1_2	23500000	24000000	9	2	271000000	271500000	15	0.666696
1_2	24000000	24500000	13	2	282500000	283000000	15	0.666696
1_2	24500000	25000000	9	2	399500000	400000000	15	0.666696
1_2	25000000	25500000	5	2	413500000	414000000	15	0.666696
1_2	25500000	26000000	6	2	431500000	432000000	15	0.666696
1_2	26000000	26500000	5	2	439500000	440000000	15	0.666696
1_2	26500000	27000000	12	2	454000000	454500000	15	0.666696
1_2	27000000	27500000	6	3	0	500000	15	0.666696
1_2	27500000	28000000	12	3	1000000	1500000	15	0.666696
1_2	28000000	28500000	11	3	7000000	7500000	15	0.666696
1_2	28500000	29000000	14	3	7500000	8000000	15	0.666696
1_2	29000000	29500000	10	3	10500000	11000000	15	0.666696
1_2	29500000	30000000	7	3	13500000	14000000	15	0.666696
1_2	30000000	30500000	14	3	14000000	14500000	15	0.666696
1_2	30500000	31000000	12	3	26000000	26500000	15	0.666696
1_2	31000000	31500000	16	3	34000000	34500000	15	0.666696
1_2	31500000	32000000	11	3	37000000	37500000	15	0.666696
1_2	32000000	32500000	35	3	53500000	54000000	15	0.666696
1_2	32500000	33000000	10	3	67000000	67500000	15	0.666696
1_2	33000000	33500000	13	3	72000000	72500000	15	0.666696
1_2	33500000	34000000	13	3	81000000	81500000	15	0.666696
1_2	34000000	34500000	7	3	104000000	104500000	15	0.666696
1_2	34500000	35000000	5	3	107500000	108000000	15	0.666696
1_2	35000000	35500000	9	3	120500000	121000000	15	0.666696
1_2	35500000	36000000	5	3	130000000	130500000	15	0.666696
1_2	36000000	36500000	13	3	141000000	141500000	15	0.666696
1_2	36500000	37000000	2	3	144000000	144500000	15	0.666696
1_2	37000000	37500000	15	3	148000000	148500000	15	0.666696
1_2	37500000	38000000	12	3	161000000	161500000	15	0.666696
1_2	38000000	38500000	7	3	161500000	162000000	15	0.666696
1_2	38500000	39000000	17	3	165000000	165500000	15	0.666696
1_2	39000000	39500000	11	3	167500000	168000000	15	0.666696
1_2	39500000	40000000	10	3	169000000	169500000	15	0.666696
1_2	40000000	40500000	13	3	178000000	178500000	15	0.666696
1_2	40500000	41000000	15	3	211000000	211500000	15	0.666696
1_2	41000000	41500000	11	3	248500000	249000000	15	0.666696
1_2	41500000	42000000	14	4	500000	1000000	15	0.666696
1_2	42000000	42500000	7	4	6000000	6500000	15	0.666696
1_2	42500000	43000000	11	4	9000000	9500000	15	0.666696
1_2	43000000	43500000	8	4	18500000	19000000	15	0.666696
1_2	43500000	44000000	15	4	20000000	20500000	15	0.666696
1_2	44000000	44500000	12	4	46500000	47000000	15	0.666696
1_2	44500000	45000000	10	4	52500000	53000000	15	0.666696
1_2	45000000	45500000	6	4	60500000	61000000	15	0.666696
1_2	45500000	46000000	11	4	65500000	66000000	15	0.666696
1_2	46000000	46500000	13	4	73500000	74000000	15	0.666696
1_2	46500000	47000000	4	4	89000000	89500000	15	0.666696
1_2	47000000	47500000	13	4	89500000	90000000	15	0.666696
1_2	47500000	48000000	7	4	124500000	125000000	15	0.666696
1_2	48000000	48500000	15	4	129500000	130000000	15	0.666696
1_2	48500000	49000000	10	4	130000000	130500000	15	0.666696
1_2	49000000	49500000	8	4	142500000	143000000	15	0.666696
1_2	49500000	50000000	6	4	153500000	154000000	15	0.666696
1_2	50000000	50500000	13	4	194000000	194500000	15	0.666696
1_2	50500000	51000000	8	4	194500000	195000000	15	0.666696
1_2	51000000	51500000	19	4	203500000	204000000	15	0.666696
1_2	51500000	52000000	8	5	11500000	12000000	15	0.666696
1_2	52000000	52500000	14	5	23000000	23500000	15	0.666696
1_2	52500000	53000000	8	5	29000000	29500000	15	0.666696
1_2	53000000	53500000	5	5	40000000	40500000	15	0.666696
1_2	53500000	54000000	6	5	42000000	42500000	15	0.666696
1_2	54000000	54500000	14	5	112000000	112500000	15	0.666696
1_2	54500000	55000000	9	5	115500000	116000000	15	0.666696
1_2	55000000	55500000	7	5	128500000	129000000	15	0.666696
1_2	55500000	56000000	9	5	132500000	133000000	15	0.666696
1_2	56000000	56500000	19	6	32000000	32500000	15	0.666696
1_2	56500000	57000000	9	6	38500000	39000000	15	0.666696
1_2	57000000	57500000	10	6	40500000	41000000	15	0.666696
1_2	57500000	58000000	11	6	43000000	43500000	15	0.666696
1_2	58000000	58500000	9	6	58500000	59000000	15	0.666696
1_2	58500000	59000000	15	6	85000000	85500000	15	0.666696
1_2	59000000	59500000	10	6	115500000	116000000	15	0.666696
1_2	59500000	60000000	8	7	32000000	32500000	15	0.666696
1_2	60000000	60500000	12	7	90500000	91000000	15	0.666696
1_2	60500000	61000000	16	7	111500000	112000000	15	0.666696
1_2	61000000	61500000	12	7	133500000	134000000	15	0.666696
1_2	61500000	62000000	35	8	17500000	18000000	15	0.666696
1_2	62000000	62500000	15	8	18000000	18500000	15	0.666696
1_2	62500000	63000000	13	8	29000000	29500000	15	0.666696
1_2	63000000	63500000	10	8	42500000	43000000	15	0.666696
1_2	63500000	64000000	10	8	62500000	63000000	15	0.666696
1_2	64000000	64500000	7	8	67000000	67500000	15	0.666696
1_2	64500000	65000000	7	8	73000000	73500000	15	0.666696
1_2	65000000	65500000	9	8	96500000	97000000	15	0.666696
1_2	65500000	66000000	6	10	11000000	11500000	14	0.542117
1_2	66000000	66500000	7	1_1	55500000	56000000	14	0.542117
1_2	66500000	67000000	10	1_1	57000000	57500000	14	0.542117
1_2	67000000	67500000	9	1_1	75000000	75500000	14	0.542117
1_2	67500000	68000000	6	1_1	98500000	99000000	14	0.542117
1_2	68000000	68500000	4	1_1	107500000	108000000	14	0.542117
1_2	68500000	69000000	7	1_1	122500000	123000000	14	0.542117
1_2	69000000	69500000	13	1_1	152000000	152500000	14	0.542117
1_2	69500000	70000000	8	1_1	154000000	154500000	14	0.542117
1_2	70000000	70500000	9	1_1	162500000	163000000	14	0.542117
1_2	70500000	71000000	5	1_1	169000000	169500000	14	0.542117
1_2	71000000	71500000	11	1_1	171000000	171500000	14	0.542117
1_2	71500000	72000000	17	1_1	189500000	190000000	14	0.542117
1_2	72000000	72500000	15	1_1	209000000	209500000	14	0.542117
1_2	72500000	73000000	10	1_1	217000000	217500000	14	0.542117
1_2	73000000	73500000	12	1_1	225000000	225500000	14	0.542117
1_2	73500000	74000000	11	1_1	235000000	235500000	14	0.542117
1_2	74000000	74500000	11	1_1	244500000	245000000	14	0.542117
1_2	74500000	75000000	5	1_2	28500000	29000000	14	0.542117
1_2	75000000	75500000	11	1_2	30000000	30500000	14	0.542117
1_2	75500000	76000000	14	1_2	41500000	42000000	14	0.542117
1_2	76000000	76500000	8	1_2	52000000	52500000	14	0.542117
1_2	76500000	77000000	20	1_2	54000000	54500000	14	0.542117
1_2	77000000	77500000	16	1_2	75500000	76000000	14	0.542117
1_2	77500000	78000000	15	1_2	81000000	81500000	14	0.542117
1_2	78000000	78500000	17	1_2	82000000	82500000	14	0.542117
1_2	78500000	79000000	10	1_2	86000000	86500000	14	0.542117
1_2	79000000	79500000	11	1_2	99500000	100000000	14	0.542117
1_2	79500000	80000000	8	1_2	104500000	105000000	14	0.542117
1_2	80000000	80500000	13	1_2	105500000	106000000	14	0.542117
1_2	80500000	81000000	7	1_2	113000000	113500000	14	0.542117
1_2	81000000	81500000	14	1_2	132000000	132500000	14	0.542117
1_2	81500000	82000000	11	1_2	133500000	134000000	14	0.542117
1_2	82000000	82500000	14	1_2	140000000	140500000	14	0.542117
1_2	82500000	83000000	8	1_2	176000000	176500000	14	0.542117
1_2	83000000	83500000	22	1_2	193000000	193500000	14	0.542117
1_2	83500000	84000000	6	1_2	246000000	246500000	14	0.542117
1_2	84000000	84500000	11	2	7000000	7500000	14	0.542117
1_2	84500000	85000000	9	2	12500000	13000000	14	0.542117
1_2	85000000	85500000	15	2	15000000	15500000	14	0.542117
1_2	85500000	86000000	9	2	15500000	16000000	14	0.542117
1_2	86000000	86500000	14	2	19000000	19500000	14	0.542117
1_2	86500000	87000000	5	2	43000000	43500000	14	0.542117
1_2	87000000	87500000	17	2	54000000	54500000	14	0.542117
1_2	87500000	88000000	15	2	59500000	60000000	14	0.542117
1_2	88000000	88500000	9	2	64500000	65000000	14	0.542117
1_2	88500000	89000000	12	2	84000000	84500000	14	0.542117
1_2	89000000	89500000	9	2	92500000	93000000	14	0.542117
1_2	89500000	90000000	18	2	94500000	95000000	14	0.542117
1_2	90000000	90500000	7	2	116500000	117000000	14	0.542117
1_2	90500000	91000000	4	2	193000000	193500000	14	0.542117
1_2	91000000	91500000	5	2	231500000	232000000	14	0.542117
1_2	91500000	92000000	7	2	238500000	239000000	14	0.542117
1_2	92000000	92500000	5	2	259500000	260000000	14	0.542117
1_2	92500000	93000000	7	2	263500000	264000000	14	0.542117
1_2	93000000	93500000	21	2	267500000	268000000	14	0.542117
1_2	93500000	94000000	8	2	269000000	269500000	14	0.542117
1_2	94000000	94500000	8	2	270500000	271000000	14	0.542117
1_2	94500000	95000000	7	2	272500000	273000000	14	0.542117
1_2	95000000	95500000	7	2	280500000	281000000	14	0.542117
1_2	95500000	96000000	10	2	281500000	282000000	14	0.542117
1_2	96000000	96500000	13	2	284500000	285000000	14	0.542117
1_2	96500000	97000000	13	2	317500000	318000000	14	0.542117
1_2	97000000	97500000	7	2	318000000	318500000	14	0.542117
1_2	97500000	98000000	8	2	319500000	320000000	14	0.542117
1_2	98000000	98500000	9	2	329500000	330000000	14	0.542117
1_2	98500000	99000000	6	2	330000000	330500000	14	0.542117
1_2	99000000	99500000	16	2	330500000	331000000	14	0.542117
1_2	99500000	100000000	14	2	334500000	335000000	14	0.542117
1_2	100000000	100500000	10	2	338000000	338500000	14	0.542117
1_2	100500000	101000000	17	2	413000000	413500000	14	0.542117
1_2	101000000	101500000	15	2	414500000	415000000	14	0.542117
1_2	101500000	102000000	11	2	416500000	417000000	14	0.542117
1_2	102000000	102500000	10	2	457000000	457500000	14	0.542117
1_2	102500000	103000000	4	2	458500000	459000000	14	0.542117
1_2	103000000	103500000	9	3	4500000	5000000	14	0.542117
1_2	103500000	104000000	12	3	11500000	12000000	14	0.542117
1_2	104000000	104500000	7	3	21500000	22000000	14	0.542117
1_2	104500000	105000000	14	3	30000000	30500000	14	0.542117
1_2	105000000	105500000	13	3	46500000	47000000	14	0.542117
1_2	105500000	106000000	14	3	57500000	58000000	14	0.542117
1_2	106000000	106500000	4	3	68500000	69000000	14	0.542117
1_2	106500000	107000000	2	3	70000000	70500000	14	0.542117
1_2	107000000	107500000	13	3	74000000	74500000	14	0.542117
1_2	107500000	108000000	8	3	77500000	78000000	14	0.542117
1_2	108000000	108500000	8	3	83500000	84000000	14	0.542117
1_2	108500000	109000000	10	3	84500000	85000000	14	0.542117
1_2	109000000	109500000	12	3	107000000	107500000	14	0.542117
1_2	109500000	110000000	8	3	108500000	109000000	14	0.542117
1_2	110000000	110500000	4	3	134000000	134500000	14	0.542117
1_2	110500000	111000000	5	3	141500000	142000000	14	0.542117
1_2	111000000	111500000	16	3	143000000	143500000	14	0.542117
1_2	111500000	112000000	3	3	170500000	171000000	14	0.542117
1_2	112000000	112500000	9	3	187000000	187500000	14	0.542117
1_2	112500000	113000000	8	3	201500000	202000000	14	0.542117
1_2	113000000	113500000	14	3	204500000	205000000	14	0.542117
1_2	113500000	114000000	6	3	215000000	215500000	14	0.542117
1_2	114000000	114500000	10	3	232000000	232500000	14	0.542117
1_2	114500000	115000000	10	3	234500000	235000000	14	0.542117
1_2	115000000	115500000	10	3	241500000	242000000	14	0.542117
1_2	115500000	116000000	6	3	245500000	246000000	14	0.542117
1_2	116000000	116500000	9	3	250500000	251000000	14	0.542117
1_2	116500000	117000000	9	3	251500000	252000000	14	0.542117
1_2	117000000	117500000	7	3	253500000	254000000	14	0.542117
1_2	117500000	118000000	9	4	2500000	3000000	14	0.542117
1_2	118000000	118500000	7	4	8000000	8500000	14	0.542117
1_2	118500000	119000000	8	4	15000000	15500000	14	0.542117
1_2	119000000	119500000	5	4	21000000	21500000	14	0.542117
1_2	119500000	120000000	8	4	35000000	35500000	14	0.542117
1_2	120000000	120500000	5	4	36000000	36500000	14	0.542117
1_2	120500000	121000000	8	4	41500000	42000000	14	0.542117
1_2	121000000	121500000	6	4	54500000	55000000	14	0.542117
1_2	121500000	122000000	11	4	58000000	58500000	14	0.542117
1_2	122000000	122500000	13	4	70000000	70500000	14	0.542117
1_2	122500000	123000000	8	4	78000000	78500000	14	0.542117
1_2	123000000	123500000	5	4	79500000	80000000	14	0.542117
1_2	123500000	124000000	5	4	82500000	83000000	14	0.542117
1_2	124000000	124500000	6	4	90000000	90500000	14	0.542117
1_2	124500000	125000000	5	4	105000000	105500000	14	0.542117
1_2	125000000	125500000	5	4	106000000	106500000	14	0.542117
1_2	125500000	126000000	10	4	123500000	124000000	14	0.542117
1_2	126000000	126500000	8	4	125000000	125500000	14	0.542117
1_2	126500000	127000000	6	4	149500000	150000000	14	0.542117
1_2	127000000	127500000	4	4	150000000	150500000	14	0.542117
1_2	127500000	128000000	7	4	165000000	165500000	14	0.542117
1_2	128000000	128500000	7	4	173500000	174000000	14	0.542117
1_2	128500000	129000000	3	4	181500000	182000000	14	0.542117
1_2	129000000	129500000	4	4	225000000	225500000	14	0.542117
1_2	129500000	130000000	7	5	28000000	28500000	14	0.542117
1_2	130000000	130500000	11	5	38500000	39000000	14	0.542117
1_2	130500000	131000000	2	5	76000000	76500000	14	0.542117
1_2	131000000	131500000	9	5	119500000	120000000	14	0.542117
1_2	131500000	132000000	7	5	121500000	122000000	14	0.542117
1_2	132000000	132500000	14	5	131000000	131500000	14	0.542117
1_2	132500000	133000000	7	5	143000000	143500000	14	0.542117
1_2	133000000	133500000	5	5	145000000	145500000	14	0.542117
1_2	133500000	134000000	14	5	146000000	146500000	14	0.542117
1_2	134000000	134500000	8	5	163500000	164000000	14	0.542117
1_2	134500000	135000000	9	5	170000000	170500000	14	0.542117
1_2	135000000	135500000	7	5	187000000	187500000	14	0.542117
1_2	135500000	136000000	7	5	192500000	193000000	14	0.542117
1_2	136000000	136500000	12	6	14500000	15000000	14	0.542117
1_2	136500000	137000000	10	6	29000000	29500000	14	0.542117
1_2	137000000	137500000	8	6	47000000	47500000	14	0.542117
1_2	137500000	138000000	1	6	51000000	51500000	14	0.542117
1_2	138000000	138500000	7	6	52000000	52500000	14	0.542117
1_2	138500000	139000000	11	6	63500000	64000000	14	0.542117
1_2	139000000	139500000	12	6	102500000	103000000	14	0.542117
1_2	139500000	140000000	7	6	118000000	118500000	14	0.542117
1_2	140000000	140500000	14	6	122500000	123000000	14	0.542117
1_2	140500000	141000000	8	6	127000000	127500000	14	0.542117
1_2	141000000	141500000	11	6	152000000	152500000	14	0.542117
1_2	141500000	142000000	3	7	12500000	13000000	14	0.542117
1_2	142000000	142500000	3	7	23500000	24000000	14	0.542117
1_2	142500000	143000000	11	7	45500000	46000000	14	0.542117
1_2	143000000	143500000	10	7	93500000	94000000	14	0.542117
1_2	143500000	144000000	9	7	102000000	102500000	14	0.542117
1_2	144000000	144500000	10	8	4000000	4500000	14	0.542117
1_2	144500000	145000000	11	8	16500000	17000000	14	0.542117
1_2	145000000	145500000	8	8	91500000	92000000	14	0.542117
1_2	145500000	146000000	4	8	95000000	95500000	14	0.542117
1_2	146000000	146500000	2	9	12500000	13000000	14	0.542117
1_2	146500000	147000000	5	X	116500000	117000000	14	0.542117
1_2	147000000	147500000	8	10	18000000	18500000	13	0.417538
1_2	147500000	148000000	7	1_1	2000000	2500000	13	0.417538
1_2	148000000	148500000	8	1_1	13000000	13500000	13	0.417538
1_2	148500000	149000000	3	1_1	15500000	16000000	13	0.417538
1_2	149000000	149500000	7	1_1	33000000	33500000	13	0.417538
1_2	149500000	150000000	3	1_1	33500000	34000000	13	0.417538
1_2	150000000	150500000	7	1_1	36500000	37000000	13	0.417538
1_2	150500000	151000000	3	1_1	94000000	94500000	13	0.417538
1_2	151000000	151500000	6	1_1	108000000	108500000	13	0.417538
1_2	151500000	152000000	11	1_1	115500000	116000000	13	0.417538
1_2	152000000	152500000	5	1_1	117000000	117500000	13	0.417538
1_2	152500000	153000000	9	1_1	122000000	122500000	13	0.417538
1_2	153000000	153500000	7	1_1	166000000	166500000	13	0.417538
1_2	153500000	154000000	13	1_1	176000000	176500000	13	0.417538
1_2	154000000	154500000	5	1_1	179500000	180000000	13	0.417538
1_2	154500000	155000000	7	1_1	196500000	197000000	13	0.417538
1_2	155000000	155500000	13	1_1	210000000	210500000	13	0.417538
1_2	155500000	156000000	4	1_1	213500000	214000000	13	0.417538
1_2	156000000	156500000	5	1_1	218000000	218500000	13	0.417538
1_2	156500000	157000000	10	1_1	234500000	235000000	13	0.417538
1_2	157000000	157500000	9	1_1	236000000	236500000	13	0.417538
1_2	157500000	158000000	7	1_1	242500000	243000000	13	0.417538
1_2	158000000	158500000	29	1_1	270000000	270500000	13	0.417538
1_2	158500000	159000000	11	1_1	274500000	275000000	13	0.417538
1_2	159000000	159500000	6	1_2	6500000	7000000	13	0.417538
1_2	159500000	160000000	13	1_2	8500000	9000000	13	0.417538
1_2	160000000	160500000	12	1_2	13500000	14000000	13	0.417538
1_2	160500000	161000000	13	1_2	24000000	24500000	13	0.417538
1_2	161000000	161500000	8	1_2	33000000	33500000	13	0.417538
1_2	161500000	162000000	13	1_2	33500000	34000000	13	0.417538
1_2	162000000	162500000	3	1_2	36000000	36500000	13	0.417538
1_2	162500000	163000000	13	1_2	40000000	40500000	13	0.417538
1_2	163000000	163500000	12	1_2	46000000	46500000	13	0.417538
1_2	163500000	164000000	13	1_2	47000000	47500000	13	0.417538
1_2	164000000	164500000	13	1_2	50000000	50500000	13	0.417538
1_2	164500000	165000000	9	1_2	62500000	63000000	13	0.417538
1_2	165000000	165500000	12	1_2	69000000	69500000	13	0.417538
1_2	165500000	166000000	11	1_2	80000000	80500000	13	0.417538
1_2	166000000	166500000	10	1_2	96000000	96500000	13	0.417538
1_2	166500000	167000000	5	1_2	96500000	97000000	13	0.417538
1_2	167000000	167500000	6	1_2	105000000	105500000	13	0.417538
1_2	167500000	168000000	5	1_2	107000000	107500000	13	0.417538
1_2	168000000	168500000	3	1_2	122000000	122500000	13	0.417538
1_2	168500000	169000000	9	1_2	153500000	154000000	13	0.417538
1_2	169000000	169500000	12	1_2	155000000	155500000	13	0.417538
1_2	169500000	170000000	4	1_2	159500000	160000000	13	0.417538
1_2	170000000	170500000	11	1_2	160500000	161000000	13	0.417538
1_2	170500000	171000000	3	1_2	161500000	162000000	13	0.417538
1_2	171000000	171500000	9	1_2	162500000	163000000	13	0.417538
1_2	171500000	172000000	13	1_2	163500000	164000000	13	0.417538
1_2	172000000	172500000	12	1_2	164000000	164500000	13	0.417538
1_2	172500000	173000000	5	1_2	171500000	172000000	13	0.417538
1_2	173000000	173500000	8	1_2	175500000	176000000	13	0.417538
1_2	173500000	174000000	9	1_2	176500000	177000000	13	0.417538
1_2	174000000	174500000	15	1_2	186000000	186500000	13	0.417538
1_2	174500000	175000000	4	1_2	189000000	189500000	13	0.417538
1_2	175000000	175500000	7	1_2	232000000	232500000	13	0.417538
1_2	175500000	176000000	13	1_2	253500000	254000000	13	0.417538
1_2	176000000	176500000	14	1_2	258500000	259000000	13	0.417538
1_2	176500000	177000000	13	2	1000000	1500000	13	0.417538
1_2	177000000	177500000	3	2	6500000	7000000	13	0.417538
1_2	177500000	178000000	10	2	10500000	11000000	13	0.417538
1_2	178000000	178500000	8	2	17500000	18000000	13	0.417538
1_2	178500000	179000000	5	2	18000000	18500000	13	0.417538
1_2	179000000	179500000	8	2	31000000	31500000	13	0.417538
1_2	179500000	180000000	7	2	35500000	36000000	13	0.417538
1_2	180000000	180500000	4	2	46500000	47000000	13	0.417538
1_2	180500000	181000000	11	2	53500000	54000000	13	0.417538
1_2	181000000	181500000	2	2	54500000	55000000	13	0.417538
1_2	181500000	182000000	9	2	56500000	57000000	13	0.417538
1_2	182000000	182500000	7	2	57500000	58000000	13	0.417538
1_2	182500000	183000000	11	2	59000000	59500000	13	0.417538
1_2	183000000	183500000	11	2	64000000	64500000	13	0.417538
1_2	183500000	184000000	8	2	68500000	69000000	13	0.417538
1_2	184000000	184500000	8	2	69000000	69500000	13	0.417538
1_2	184500000	185000000	3	2	73500000	74000000	13	0.417538
1_2	185000000	185500000	6	2	89500000	90000000	13	0.417538
1_2	185500000	186000000	5	2	93000000	93500000	13	0.417538
1_2	186000000	186500000	13	2	115000000	115500000	13	0.417538
1_2	186500000	187000000	8	2	154500000	155000000	13	0.417538
1_2	187000000	187500000	5	2	171000000	171500000	13	0.417538
1_2	187500000	188000000	7	2	191000000	191500000	13	0.417538
1_2	188000000	188500000	5	2	198500000	199000000	13	0.417538
1_2	188500000	189000000	4	2	235000000	235500000	13	0.417538
1_2	189000000	189500000	13	2	246000000	246500000	13	0.417538
1_2	189500000	190000000	8	2	248500000	249000000	13	0.417538
1_2	190000000	190500000	2	2	253000000	253500000	13	0.417538
1_2	190500000	191000000	7	2	257500000	258000000	13	0.417538
1_2	191000000	191500000	5	2	272000000	272500000	13	0.417538
1_2	191500000	192000000	9	2	283000000	283500000	13	0.417538
1_2	192000000	192500000	10	2	286000000	286500000	13	0.417538
1_2	192500000	193000000	8	2	286500000	287000000	13	0.417538
1_2	193000000	193500000	14	2	325500000	326000000	13	0.417538
1_2	193500000	194000000	10	2	327500000	328000000	13	0.417538
1_2	194000000	194500000	1	2	338500000	339000000	13	0.417538
1_2	194500000	195000000	3	2	345000000	345500000	13	0.417538
1_2	195000000	195500000	44	2	391500000	392000000	13	0.417538
1_2	195500000	196000000	40	2	429500000	430000000	13	0.417538
1_2	196000000	196500000	30	2	432500000	433000000	13	0.417538
1_2	196500000	197000000	9	2	433000000	433500000	13	0.417538
1_2	197000000	197500000	5	2	445500000	446000000	13	0.417538
1_2	197500000	198000000	4	2	446000000	446500000	13	0.417538
1_2	198000000	198500000	6	2	449500000	450000000	13	0.417538
1_2	198500000	199000000	9	2	450500000	451000000	13	0.417538
1_2	199000000	199500000	5	2	453500000	454000000	13	0.417538
1_2	199500000	200000000	8	2	457500000	458000000	13	0.417538
1_2	200000000	200500000	7	3	1500000	2000000	13	0.417538
1_2	200500000	201000000	8	3	3500000	4000000	13	0.417538
1_2	201000000	201500000	19	3	4000000	4500000	13	0.417538
1_2	201500000	202000000	10	3	18000000	18500000	13	0.417538
1_2	202000000	202500000	9	3	22500000	23000000	13	0.417538
1_2	202500000	203000000	8	3	23000000	23500000	13	0.417538
1_2	203000000	203500000	8	3	24500000	25000000	13	0.417538
1_2	203500000	204000000	10	3	29000000	29500000	13	0.417538
1_2	204000000	204500000	6	3	36000000	36500000	13	0.417538
1_2	204500000	205000000	6	3	36500000	37000000	13	0.417538
1_2	205000000	205500000	9	3	43500000	44000000	13	0.417538
1_2	205500000	206000000	11	3	47000000	47500000	13	0.417538
1_2	206000000	206500000	12	3	50000000	50500000	13	0.417538
1_2	206500000	207000000	9	3	66500000	67000000	13	0.417538
1_2	207000000	207500000	7	3	67500000	68000000	13	0.417538
1_2	207500000	208000000	12	3	78000000	78500000	13	0.417538
1_2	208000000	208500000	9	3	79000000	79500000	13	0.417538
1_2	208500000	209000000	17	3	79500000	80000000	13	0.417538
1_2	209000000	209500000	4	3	89500000	90000000	13	0.417538
1_2	209500000	210000000	8	3	97500000	98000000	13	0.417538
1_2	210000000	210500000	8	3	98000000	98500000	13	0.417538
1_2	210500000	211000000	7	3	99500000	100000000	13	0.417538
1_2	211000000	211500000	4	3	105000000	105500000	13	0.417538
1_2	211500000	212000000	12	3	105500000	106000000	13	0.417538
1_2	212000000	212500000	5	3	108000000	108500000	13	0.417538
1_2	212500000	213000000	6	3	113000000	113500000	13	0.417538
1_2	213000000	213500000	16	3	122000000	122500000	13	0.417538
1_2	213500000	214000000	7	3	123000000	123500000	13	0.417538
1_2	214000000	214500000	8	3	136500000	137000000	13	0.417538
1_2	214500000	215000000	2	3	139500000	140000000	13	0.417538
1_2	215000000	215500000	6	3	142500000	143000000	13	0.417538
1_2	215500000	216000000	5	3	145000000	145500000	13	0.417538
1_2	216000000	216500000	6	3	158500000	159000000	13	0.417538
1_2	216500000	217000000	7	3	166500000	167000000	13	0.417538
1_2	217000000	217500000	9	3	173000000	173500000	13	0.417538
1_2	217500000	218000000	5	3	174500000	175000000	13	0.417538
1_2	218000000	218500000	10	3	176500000	177000000	13	0.417538
1_2	218500000	219000000	9	3	181500000	182000000	13	0.417538
1_2	219000000	219500000	10	3	183000000	183500000	13	0.417538
1_2	219500000	220000000	9	3	184000000	184500000	13	0.417538
1_2	220000000	220500000	4	3	184500000	185000000	13	0.417538
1_2	220500000	221000000	16	3	186000000	186500000	13	0.417538
1_2	221000000	221500000	20	3	189000000	189500000	13	0.417538
1_2	221500000	222000000	2	3	193000000	193500000	13	0.417538
1_2	222000000	222500000	5	3	196500000	197000000	13	0.417538
1_2	222500000	223000000	7	3	197500000	198000000	13	0.417538
1_2	223000000	223500000	5	3	213500000	214000000	13	0.417538
1_2	223500000	224000000	6	3	216500000	217000000	13	0.417538
1_2	224000000	224500000	11	3	222000000	222500000	13	0.417538
1_2	224500000	225000000	12	3	223500000	224000000	13	0.417538
1_2	225000000	225500000	12	3	233500000	234000000	13	0.417538
1_2	225500000	226000000	4	3	248000000	248500000	13	0.417538
1_2	226000000	226500000	6	3	262000000	262500000	13	0.417538
1_2	226500000	227000000	8	4	22000000	22500000	13	0.417538
1_2	227000000	227500000	16	4	30000000	30500000	13	0.417538
1_2	227500000	228000000	9	4	32000000	32500000	13	0.417538
1_2	228000000	228500000	11	4	37000000	37500000	13	0.417538
1_2	228500000	229000000	8	4	41000000	41500000	13	0.417538
1_2	229000000	229500000	18	4	47500000	48000000	13	0.417538
1_2	229500000	230000000	1	4	56000000	56500000	13	0.417538
1_2	230000000	230500000	12	4	68000000	68500000	13	0.417538
1_2	230500000	231000000	1	4	69000000	69500000	13	0.417538
1_2	231000000	231500000	7	4	73000000	73500000	13	0.417538
1_2	231500000	232000000	12	4	80500000	81000000	13	0.417538
1_2	232000000	232500000	13	4	82000000	82500000	13	0.417538
1_2	232500000	233000000	4	4	84000000	84500000	13	0.417538
1_2	233000000	233500000	6	4	87000000	87500000	13	0.417538
1_2	233500000	234000000	9	4	92000000	92500000	13	0.417538
1_2	234000000	234500000	3	4	102500000	103000000	13	0.417538
1_2	234500000	235000000	7	4	104500000	105000000	13	0.417538
1_2	235000000	235500000	4	4	134500000	135000000	13	0.417538
1_2	235500000	236000000	7	4	135500000	136000000	13	0.417538
1_2	236000000	236500000	4	4	145000000	145500000	13	0.417538
1_2	236500000	237000000	4	4	157500000	158000000	13	0.417538
1_2	237000000	237500000	5	4	161000000	161500000	13	0.417538
1_2	237500000	238000000	6	4	170500000	171000000	13	0.417538
1_2	238000000	238500000	8	4	187000000	187500000	13	0.417538
1_2	238500000	239000000	7	4	189000000	189500000	13	0.417538
1_2	239000000	239500000	7	4	193000000	193500000	13	0.417538
1_2	239500000	240000000	5	4	205500000	206000000	13	0.417538
1_2	240000000	240500000	6	4	206000000	206500000	13	0.417538
1_2	240500000	241000000	0	4	209000000	209500000	13	0.417538
1_2	241000000	241500000	12	4	216000000	216500000	13	0.417538
1_2	241500000	242000000	10	4	220000000	220500000	13	0.417538
1_2	242000000	242500000	6	5	13500000	14000000	13	0.417538
1_2	242500000	243000000	6	5	18000000	18500000	13	0.417538
1_2	243000000	243500000	5	5	20500000	21000000	13	0.417538
1_2	243500000	244000000	8	5	25500000	26000000	13	0.417538
1_2	244000000	244500000	4	5	27000000	27500000	13	0.417538
1_2	244500000	245000000	1	5	41500000	42000000	13	0.417538
1_2	245000000	245500000	3	5	56500000	57000000	13	0.417538
1_2	245500000	246000000	9	5	64000000	64500000	13	0.417538
1_2	246000000	246500000	14	5	74500000	75000000	13	0.417538
1_2	246500000	247000000	5	5	83500000	84000000	13	0.417538
1_2	247000000	247500000	8	5	85000000	85500000	13	0.417538
1_2	247500000	248000000	10	5	86500000	87000000	13	0.417538
1_2	248000000	248500000	9	5	88500000	89000000	13	0.417538
1_2	248500000	249000000	8	5	89500000	90000000	13	0.417538
1_2	249000000	249500000	7	5	95500000	96000000	13	0.417538
1_2	249500000	250000000	8	5	118000000	118500000	13	0.417538
1_2	250000000	250500000	12	5	133000000	133500000	13	0.417538
1_2	250500000	251000000	11	5	136500000	137000000	13	0.417538
1_2	251000000	251500000	7	5	142000000	142500000	13	0.417538
1_2	251500000	252000000	6	5	146500000	147000000	13	0.417538
1_2	252000000	252500000	9	5	165000000	165500000	13	0.417538
1_2	252500000	253000000	5	5	168000000	168500000	13	0.417538
1_2	253000000	253500000	10	5	183500000	184000000	13	0.417538
1_2	253500000	254000000	13	5	187500000	188000000	13	0.417538
1_2	254000000	254500000	4	6	4500000	5000000	13	0.417538
1_2	254500000	255000000	8	6	18000000	18500000	13	0.417538
1_2	255000000	255500000	9	6	19500000	20000000	13	0.417538
1_2	255500000	256000000	7	6	24500000	25000000	13	0.417538
1_2	256000000	256500000	7	6	25500000	26000000	13	0.417538
1_2	256500000	257000000	10	6	43500000	44000000	13	0.417538
1_2	257000000	257500000	7	6	57000000	57500000	13	0.417538
1_2	257500000	258000000	6	6	70000000	70500000	13	0.417538
1_2	258000000	258500000	7	6	74500000	75000000	13	0.417538
1_2	258500000	259000000	13	6	75500000	76000000	13	0.417538
1_2	259000000	259500000	1	6	79000000	79500000	13	0.417538
1_2	259500000	260000000	8	6	81500000	82000000	13	0.417538
1_2	260000000	260500000	8	6	94000000	94500000	13	0.417538
1_2	260500000	261000000	5	6	126500000	127000000	13	0.417538
1_2	261000000	261500000	12	6	135000000	135500000	13	0.417538
1_2	261500000	262000000	9	6	140000000	140500000	13	0.417538
1_2	262000000	262500000	10	7	5000000	5500000	13	0.417538
1_2	262500000	263000000	3	7	93000000	93500000	13	0.417538
1_2	263000000	263500000	6	7	104000000	104500000	13	0.417538
1_2	263500000	264000000	9	7	106500000	107000000	13	0.417538
1_2	264000000	264500000	10	7	112500000	113000000	13	0.417538
1_2	264500000	265000000	2	7	113500000	114000000	13	0.417538
1_2	265000000	265500000	6	7	117500000	118000000	13	0.417538
1_2	265500000	266000000	7	8	24500000	25000000	13	0.417538
1_2	266000000	266500000	3	8	26000000	26500000	13	0.417538
1_2	266500000	267000000	9	8	49000000	49500000	13	0.417538
1_2	267000000	267500000	7	8	57500000	58000000	13	0.417538
1_2	267500000	268000000	10	8	74000000	74500000	13	0.417538
1_2	268000000	268500000	10	8	77000000	77500000	13	0.417538
1_2	268500000	269000000	7	8	80500000	81000000	13	0.417538
1_2	269000000	269500000	15	X	43500000	44000000	13	0.417538
1_2	269500000	270000000	6	X	49500000	50000000	13	0.417538
1_2	270000000	270500000	9	10	12500000	13000000	12	0.292958
1_2	270500000	271000000	7	1_1	1500000	2000000	12	0.292958
1_2	271000000	271500000	5	1_1	18000000	18500000	12	0.292958
1_2	271500000	272000000	7	1_1	27000000	27500000	12	0.292958
1_2	272000000	272500000	9	1_1	28500000	29000000	12	0.292958
1_2	272500000	273000000	6	1_1	35000000	35500000	12	0.292958
1_2	273000000	273500000	7	1_1	49000000	49500000	12	0.292958
1_2	273500000	274000000	7	1_1	55000000	55500000	12	0.292958
1_2	274000000	274391693	12	1_1	60000000	60500000	12	0.292958
2	0	500000	9	1_1	107000000	107500000	12	0.292958
2	500000	1000000	7	1_1	108500000	109000000	12	0.292958
2	1000000	1500000	13	1_1	111000000	111500000	12	0.292958
2	1500000	2000000	8	1_1	136000000	136500000	12	0.292958
2	2000000	2500000	10	1_1	147000000	147500000	12	0.292958
2	2500000	3000000	11	1_1	152500000	153000000	12	0.292958
2	3000000	3500000	17	1_1	159500000	160000000	12	0.292958
2	3500000	4000000	7	1_1	174000000	174500000	12	0.292958
2	4000000	4500000	12	1_1	193500000	194000000	12	0.292958
2	4500000	5000000	23	1_1	201500000	202000000	12	0.292958
2	5000000	5500000	11	1_1	202500000	203000000	12	0.292958
2	5500000	6000000	11	1_1	212500000	213000000	12	0.292958
2	6000000	6500000	23	1_1	214500000	215000000	12	0.292958
2	6500000	7000000	13	1_1	221000000	221500000	12	0.292958
2	7000000	7500000	14	1_1	233500000	234000000	12	0.292958
2	7500000	8000000	10	1_1	237500000	238000000	12	0.292958
2	8000000	8500000	7	1_1	238000000	238500000	12	0.292958
2	8500000	9000000	11	1_1	239000000	239500000	12	0.292958
2	9000000	9500000	12	1_2	1500000	2000000	12	0.292958
2	9500000	10000000	19	1_2	26500000	27000000	12	0.292958
2	10000000	10500000	12	1_2	27500000	28000000	12	0.292958
2	10500000	11000000	13	1_2	30500000	31000000	12	0.292958
2	11000000	11500000	9	1_2	37500000	38000000	12	0.292958
2	11500000	12000000	9	1_2	44000000	44500000	12	0.292958
2	12000000	12500000	10	1_2	60000000	60500000	12	0.292958
2	12500000	13000000	14	1_2	61000000	61500000	12	0.292958
2	13000000	13500000	8	1_2	73000000	73500000	12	0.292958
2	13500000	14000000	20	1_2	88500000	89000000	12	0.292958
2	14000000	14500000	11	1_2	103500000	104000000	12	0.292958
2	14500000	15000000	18	1_2	109000000	109500000	12	0.292958
2	15000000	15500000	14	1_2	136000000	136500000	12	0.292958
2	15500000	16000000	14	1_2	139000000	139500000	12	0.292958
2	16000000	16500000	11	1_2	160000000	160500000	12	0.292958
2	16500000	17000000	9	1_2	163000000	163500000	12	0.292958
2	17000000	17500000	9	1_2	165000000	165500000	12	0.292958
2	17500000	18000000	13	1_2	169000000	169500000	12	0.292958
2	18000000	18500000	13	1_2	172000000	172500000	12	0.292958
2	18500000	19000000	10	1_2	206000000	206500000	12	0.292958
2	19000000	19500000	14	1_2	207500000	208000000	12	0.292958
2	19500000	20000000	11	1_2	211500000	212000000	12	0.292958
2	20000000	20500000	9	1_2	224500000	225000000	12	0.292958
2	20500000	21000000	9	1_2	225000000	225500000	12	0.292958
2	21000000	21500000	17	1_2	230000000	230500000	12	0.292958
2	21500000	22000000	11	1_2	231500000	232000000	12	0.292958
2	22000000	22500000	7	1_2	241000000	241500000	12	0.292958
2	22500000	23000000	8	1_2	250000000	250500000	12	0.292958
2	23000000	23500000	5	1_2	261000000	261500000	12	0.292958
2	23500000	24000000	19	1_2	274000000	274391693	12	0.292958
2	24000000	24500000	6	2	4000000	4500000	12	0.292958
2	24500000	25000000	7	2	9000000	9500000	12	0.292958
2	25000000	25500000	7	2	10000000	10500000	12	0.292958
2	25500000	26000000	19	2	26000000	26500000	12	0.292958
2	26000000	26500000	12	2	30000000	30500000	12	0.292958
2	26500000	27000000	8	2	30500000	31000000	12	0.292958
2	27000000	27500000	17	2	35000000	35500000	12	0.292958
2	27500000	28000000	8	2	41500000	42000000	12	0.292958
2	28000000	28500000	16	2	51500000	52000000	12	0.292958
2	28500000	29000000	6	2	56000000	56500000	12	0.292958
2	29000000	29500000	9	2	60500000	61000000	12	0.292958
2	29500000	30000000	5	2	62000000	62500000	12	0.292958
2	30000000	30500000	12	2	63500000	64000000	12	0.292958
2	30500000	31000000	12	2	70000000	70500000	12	0.292958
2	31000000	31500000	13	2	71000000	71500000	12	0.292958
2	31500000	32000000	6	2	87000000	87500000	12	0.292958
2	32000000	32500000	4	2	160500000	161000000	12	0.292958
2	32500000	33000000	8	2	170000000	170500000	12	0.292958
2	33000000	33500000	4	2	179500000	180000000	12	0.292958
2	33500000	34000000	17	2	180500000	181000000	12	0.292958
2	34000000	34500000	5	2	202000000	202500000	12	0.292958
2	34500000	35000000	36	2	233500000	234000000	12	0.292958
2	35000000	35500000	12	2	245500000	246000000	12	0.292958
2	35500000	36000000	13	2	247000000	247500000	12	0.292958
2	36000000	36500000	10	2	255500000	256000000	12	0.292958
2	36500000	37000000	5	2	260500000	261000000	12	0.292958
2	37000000	37500000	5	2	265000000	265500000	12	0.292958
2	37500000	38000000	8	2	273500000	274000000	12	0.292958
2	38000000	38500000	16	2	320000000	320500000	12	0.292958
2	38500000	39000000	8	2	320500000	321000000	12	0.292958
2	39000000	39500000	10	2	323000000	323500000	12	0.292958
2	39500000	40000000	19	2	327000000	327500000	12	0.292958
2	40000000	40500000	8	2	334000000	334500000	12	0.292958
2	40500000	41000000	17	2	337000000	337500000	12	0.292958
2	41000000	41500000	91	2	340000000	340500000	12	0.292958
2	41500000	42000000	12	2	340500000	341000000	12	0.292958
2	42000000	42500000	11	2	342500000	343000000	12	0.292958
2	42500000	43000000	7	2	343500000	344000000	12	0.292958
2	43000000	43500000	14	2	344000000	344500000	12	0.292958
2	43500000	44000000	6	2	364000000	364500000	12	0.292958
2	44000000	44500000	7	2	384500000	385000000	12	0.292958
2	44500000	45000000	9	2	404000000	404500000	12	0.292958
2	45000000	45500000	10	2	415000000	415500000	12	0.292958
2	45500000	46000000	18	2	422000000	422500000	12	0.292958
2	46000000	46500000	10	2	437500000	438000000	12	0.292958
2	46500000	47000000	13	2	453000000	453500000	12	0.292958
2	47000000	47500000	17	2	459500000	460000000	12	0.292958
2	47500000	48000000	6	3	2500000	3000000	12	0.292958
2	48000000	48500000	7	3	12500000	13000000	12	0.292958
2	48500000	49000000	11	3	13000000	13500000	12	0.292958
2	49000000	49500000	20	3	14500000	15000000	12	0.292958
2	49500000	50000000	8	3	16500000	17000000	12	0.292958
2	50000000	50500000	17	3	31000000	31500000	12	0.292958
2	50500000	51000000	8	3	51000000	51500000	12	0.292958
2	51000000	51500000	9	3	80000000	80500000	12	0.292958
2	51500000	52000000	12	3	81500000	82000000	12	0.292958
2	52000000	52500000	8	3	87500000	88000000	12	0.292958
2	52500000	53000000	15	3	88000000	88500000	12	0.292958
2	53000000	53500000	7	3	90500000	91000000	12	0.292958
2	53500000	54000000	13	3	91000000	91500000	12	0.292958
2	54000000	54500000	14	3	92000000	92500000	12	0.292958
2	54500000	55000000	13	3	100500000	101000000	12	0.292958
2	55000000	55500000	6	3	111500000	112000000	12	0.292958
2	55500000	56000000	6	3	115500000	116000000	12	0.292958
2	56000000	56500000	12	3	125500000	126000000	12	0.292958
2	56500000	57000000	13	3	128000000	128500000	12	0.292958
2	57000000	57500000	6	3	130500000	131000000	12	0.292958
2	57500000	58000000	13	3	136000000	136500000	12	0.292958
2	58000000	58500000	9	3	140500000	141000000	12	0.292958
2	58500000	59000000	20	3	147500000	148000000	12	0.292958
2	59000000	59500000	13	3	167000000	167500000	12	0.292958
2	59500000	60000000	14	3	186500000	187000000	12	0.292958
2	60000000	60500000	17	3	191500000	192000000	12	0.292958
2	60500000	61000000	12	3	194000000	194500000	12	0.292958
2	61000000	61500000	18	3	199000000	199500000	12	0.292958
2	61500000	62000000	9	3	199500000	200000000	12	0.292958
2	62000000	62500000	12	3	220000000	220500000	12	0.292958
2	62500000	63000000	9	3	230500000	231000000	12	0.292958
2	63000000	63500000	8	3	240000000	240500000	12	0.292958
2	63500000	64000000	12	3	242500000	243000000	12	0.292958
2	64000000	64500000	13	3	246500000	247000000	12	0.292958
2	64500000	65000000	14	3	253000000	253500000	12	0.292958
2	65000000	65500000	10	3	254000000	254500000	12	0.292958
2	65500000	66000000	5	3	259500000	260000000	12	0.292958
2	66000000	66500000	10	4	4000000	4500000	12	0.292958
2	66500000	67000000	8	4	12500000	13000000	12	0.292958
2	67000000	67500000	6	4	25500000	26000000	12	0.292958
2	67500000	68000000	8	4	32500000	33000000	12	0.292958
2	68000000	68500000	9	4	34000000	34500000	12	0.292958
2	68500000	69000000	13	4	38500000	39000000	12	0.292958
2	69000000	69500000	13	4	42500000	43000000	12	0.292958
2	69500000	70000000	6	4	44000000	44500000	12	0.292958
2	70000000	70500000	12	4	44500000	45000000	12	0.292958
2	70500000	71000000	4	4	59500000	60000000	12	0.292958
2	71000000	71500000	12	4	60000000	60500000	12	0.292958
2	71500000	72000000	8	4	70500000	71000000	12	0.292958
2	72000000	72500000	10	4	71500000	72000000	12	0.292958
2	72500000	73000000	1	4	85000000	85500000	12	0.292958
2	73000000	73500000	7	4	106500000	107000000	12	0.292958
2	73500000	74000000	13	4	133000000	133500000	12	0.292958
2	74000000	74500000	7	4	136000000	136500000	12	0.292958
2	74500000	75000000	10	4	137000000	137500000	12	0.292958
2	75000000	75500000	9	4	137500000	138000000	12	0.292958
2	75500000	76000000	20	4	148000000	148500000	12	0.292958
2	76000000	76500000	9	4	149000000	149500000	12	0.292958
2	76500000	77000000	15	4	151000000	151500000	12	0.292958
2	77000000	77500000	11	4	160500000	161000000	12	0.292958
2	77500000	78000000	15	4	164500000	165000000	12	0.292958
2	78000000	78500000	19	4	183000000	183500000	12	0.292958
2	78500000	79000000	9	4	204000000	204500000	12	0.292958
2	79000000	79500000	3	4	207000000	207500000	12	0.292958
2	79500000	80000000	6	4	208000000	208500000	12	0.292958
2	80000000	80500000	10	4	218500000	219000000	12	0.292958
2	80500000	81000000	9	4	226000000	226500000	12	0.292958
2	81000000	81500000	19	4	228000000	228500000	12	0.292958
2	81500000	82000000	2	5	3500000	4000000	12	0.292958
2	82000000	82500000	7	5	21500000	22000000	12	0.292958
2	82500000	83000000	11	5	23500000	24000000	12	0.292958
2	83000000	83500000	5	5	37500000	38000000	12	0.292958
2	83500000	84000000	10	5	40500000	41000000	12	0.292958
2	84000000	84500000	14	5	46000000	46500000	12	0.292958
2	84500000	85000000	19	5	47000000	47500000	12	0.292958
2	85000000	85500000	10	5	49500000	50000000	12	0.292958
2	85500000	86000000	11	5	68500000	69000000	12	0.292958
2	86000000	86500000	15	5	71000000	71500000	12	0.292958
2	86500000	87000000	8	5	92500000	93000000	12	0.292958
2	87000000	87500000	12	5	133500000	134000000	12	0.292958
2	87500000	88000000	6	5	147000000	147500000	12	0.292958
2	88000000	88500000	8	5	147500000	148000000	12	0.292958
2	88500000	89000000	17	5	148500000	149000000	12	0.292958
2	89000000	89500000	9	5	151500000	152000000	12	0.292958
2	89500000	90000000	13	6	7000000	7500000	12	0.292958
2	90000000	90500000	17	6	7500000	8000000	12	0.292958
2	90500000	91000000	10	6	9000000	9500000	12	0.292958
2	91000000	91500000	6	6	15500000	16000000	12	0.292958
2	91500000	92000000	6	6	17000000	17500000	12	0.292958
2	92000000	92500000	15	6	26500000	27000000	12	0.292958
2	92500000	93000000	14	6	27500000	28000000	12	0.292958
2	93000000	93500000	13	6	30500000	31000000	12	0.292958
2	93500000	94000000	3	6	31500000	32000000	12	0.292958
2	94000000	94500000	9	6	32500000	33000000	12	0.292958
2	94500000	95000000	14	6	33500000	34000000	12	0.292958
2	95000000	95500000	8	6	37500000	38000000	12	0.292958
2	95500000	96000000	8	6	50000000	50500000	12	0.292958
2	96000000	96500000	16	6	51500000	52000000	12	0.292958
2	96500000	97000000	6	6	64000000	64500000	12	0.292958
2	97000000	97500000	11	6	64500000	65000000	12	0.292958
2	97500000	98000000	6	6	81000000	81500000	12	0.292958
2	98000000	98500000	4	6	86500000	87000000	12	0.292958
2	98500000	99000000	6	6	89000000	89500000	12	0.292958
2	99000000	99500000	4	6	89500000	90000000	12	0.292958
2	99500000	100000000	2	6	107500000	108000000	12	0.292958
2	100000000	100500000	4	6	109000000	109500000	12	0.292958
2	100500000	101000000	4	6	117000000	117500000	12	0.292958
2	101000000	101500000	3	6	121500000	122000000	12	0.292958
2	101500000	102000000	3	6	123500000	124000000	12	0.292958
2	102000000	102500000	5	6	131500000	132000000	12	0.292958
2	102500000	103000000	3	6	144500000	145000000	12	0.292958
2	103000000	103500000	4	6	148500000	149000000	12	0.292958
2	103500000	104000000	4	7	3500000	4000000	12	0.292958
2	104000000	104500000	7	7	4000000	4500000	12	0.292958
2	104500000	105000000	6	7	8500000	9000000	12	0.292958
2	105000000	105500000	3	7	21000000	21500000	12	0.292958
2	105500000	106000000	3	7	21500000	22000000	12	0.292958
2	106000000	106500000	6	7	23000000	23500000	12	0.292958
2	106500000	107000000	7	7	76000000	76500000	12	0.292958
2	107000000	107500000	4	7	83500000	84000000	12	0.292958
2	107500000	108000000	3	7	89500000	90000000	12	0.292958
2	108000000	108500000	1	7	96500000	97000000	12	0.292958
2	108500000	109000000	4	7	105500000	106000000	12	0.292958
2	109000000	109500000	6	7	114000000	114500000	12	0.292958
2	109500000	110000000	4	8	10000000	10500000	12	0.292958
2	110000000	110500000	6	8	28000000	28500000	12	0.292958
2	110500000	111000000	6	8	35000000	35500000	12	0.292958
2	111000000	111500000	7	8	37500000	38000000	12	0.292958
2	111500000	112000000	0	8	47000000	47500000	12	0.292958
2	112000000	112500000	4	8	49500000	50000000	12	0.292958
2	112500000	113000000	11	8	56000000	56500000	12	0.292958
2	113000000	113500000	5	8	64000000	64500000	12	0.292958
2	113500000	114000000	5	8	69500000	70000000	12	0.292958
2	114000000	114500000	1	8	82500000	83000000	12	0.292958
2	114500000	115000000	9	8	85500000	86000000	12	0.292958
2	115000000	115500000	13	8	99000000	99500000	12	0.292958
2	115500000	116000000	3	9	26500000	27000000	12	0.292958
2	116000000	116500000	6	X	100000000	100500000	12	0.292958
2	116500000	117000000	14	10	500000	1000000	11	0.168379
2	117000000	117500000	1	10	15000000	15500000	11	0.168379
2	117500000	118000000	7	1_1	13500000	14000000	11	0.168379
2	118000000	118500000	4	1_1	19000000	19500000	11	0.168379
2	118500000	119000000	3	1_1	22000000	22500000	11	0.168379
2	119000000	119500000	6	1_1	23000000	23500000	11	0.168379
2	119500000	120000000	4	1_1	30000000	30500000	11	0.168379
2	120000000	120500000	2	1_1	37000000	37500000	11	0.168379
2	120500000	121000000	8	1_1	47500000	48000000	11	0.168379
2	121000000	121500000	9	1_1	48000000	48500000	11	0.168379
2	121500000	122000000	5	1_1	48500000	49000000	11	0.168379
2	122000000	122500000	7	1_1	58500000	59000000	11	0.168379
2	122500000	123000000	6	1_1	86500000	87000000	11	0.168379
2	123000000	123500000	2	1_1	93500000	94000000	11	0.168379
2	123500000	124000000	5	1_1	98000000	98500000	11	0.168379
2	124000000	124500000	6	1_1	113500000	114000000	11	0.168379
2	124500000	125000000	9	1_1	125500000	126000000	11	0.168379
2	125000000	125500000	6	1_1	135000000	135500000	11	0.168379
2	125500000	126000000	3	1_1	138500000	139000000	11	0.168379
2	126000000	126500000	7	1_1	141000000	141500000	11	0.168379
2	126500000	127000000	5	1_1	157000000	157500000	11	0.168379
2	127000000	127500000	5	1_1	157500000	158000000	11	0.168379
2	127500000	128000000	3	1_1	158500000	159000000	11	0.168379
2	128000000	128500000	7	1_1	161500000	162000000	11	0.168379
2	128500000	129000000	7	1_1	177000000	177500000	11	0.168379
2	129000000	129500000	7	1_1	183500000	184000000	11	0.168379
2	129500000	130000000	1	1_1	187000000	187500000	11	0.168379
2	130000000	130500000	2	1_1	200000000	200500000	11	0.168379
2	130500000	131000000	2	1_1	203500000	204000000	11	0.168379
2	131000000	131500000	1	1_1	204500000	205000000	11	0.168379
2	131500000	132000000	7	1_1	207500000	208000000	11	0.168379
2	132000000	132500000	3	1_1	217500000	218000000	11	0.168379
2	132500000	133000000	6	1_1	220500000	221000000	11	0.168379
2	133000000	133500000	5	1_1	222000000	222500000	11	0.168379
2	133500000	134000000	4	1_1	247000000	247500000	11	0.168379
2	134000000	134500000	3	1_1	263500000	264000000	11	0.168379
2	134500000	135000000	5	1_1	265500000	266000000	11	0.168379
2	135000000	135500000	5	1_2	10000000	10500000	11	0.168379
2	135500000	136000000	2	1_2	11500000	12000000	11	0.168379
2	136000000	136500000	3	1_2	28000000	28500000	11	0.168379
2	136500000	137000000	3	1_2	31500000	32000000	11	0.168379
2	137000000	137500000	6	1_2	39000000	39500000	11	0.168379
2	137500000	138000000	7	1_2	41000000	41500000	11	0.168379
2	138000000	138500000	4	1_2	42500000	43000000	11	0.168379
2	138500000	139000000	2	1_2	45500000	46000000	11	0.168379
2	139000000	139500000	10	1_2	57500000	58000000	11	0.168379
2	139500000	140000000	3	1_2	71000000	71500000	11	0.168379
2	140000000	140500000	5	1_2	73500000	74000000	11	0.168379
2	140500000	141000000	3	1_2	74000000	74500000	11	0.168379
2	141000000	141500000	6	1_2	75000000	75500000	11	0.168379
2	141500000	142000000	2	1_2	79000000	79500000	11	0.168379
2	142000000	142500000	6	1_2	81500000	82000000	11	0.168379
2	142500000	143000000	7	1_2	84000000	84500000	11	0.168379
2	143000000	143500000	3	1_2	101500000	102000000	11	0.168379
2	143500000	144000000	4	1_2	121500000	122000000	11	0.168379
2	144000000	144500000	6	1_2	130000000	130500000	11	0.168379
2	144500000	145000000	11	1_2	138500000	139000000	11	0.168379
2	145000000	145500000	5	1_2	141000000	141500000	11	0.168379
2	145500000	146000000	6	1_2	142500000	143000000	11	0.168379
2	146000000	146500000	1	1_2	144500000	145000000	11	0.168379
2	146500000	147000000	4	1_2	151500000	152000000	11	0.168379
2	147000000	147500000	7	1_2	158500000	159000000	11	0.168379
2	147500000	148000000	2	1_2	165500000	166000000	11	0.168379
2	148000000	148500000	9	1_2	170000000	170500000	11	0.168379
2	148500000	149000000	7	1_2	180500000	181000000	11	0.168379
2	149000000	149500000	6	1_2	182500000	183000000	11	0.168379
2	149500000	150000000	2	1_2	183000000	183500000	11	0.168379
2	150000000	150500000	5	1_2	205500000	206000000	11	0.168379
2	150500000	151000000	6	1_2	224000000	224500000	11	0.168379
2	151000000	151500000	8	1_2	228000000	228500000	11	0.168379
2	151500000	152000000	8	1_2	250500000	251000000	11	0.168379
2	152000000	152500000	5	2	2500000	3000000	11	0.168379
2	152500000	153000000	7	2	5000000	5500000	11	0.168379
2	153000000	153500000	9	2	5500000	6000000	11	0.168379
2	153500000	154000000	6	2	8500000	9000000	11	0.168379
2	154000000	154500000	4	2	14000000	14500000	11	0.168379
2	154500000	155000000	13	2	16000000	16500000	11	0.168379
2	155000000	155500000	1	2	19500000	20000000	11	0.168379
2	155500000	156000000	1	2	21500000	22000000	11	0.168379
2	156000000	156500000	6	2	42000000	42500000	11	0.168379
2	156500000	157000000	5	2	48500000	49000000	11	0.168379
2	157000000	157500000	1	2	77000000	77500000	11	0.168379
2	157500000	158000000	4	2	82500000	83000000	11	0.168379
2	158000000	158500000	11	2	85500000	86000000	11	0.168379
2	158500000	159000000	5	2	97000000	97500000	11	0.168379
2	159000000	159500000	3	2	112500000	113000000	11	0.168379
2	159500000	160000000	6	2	144500000	145000000	11	0.168379
2	160000000	160500000	4	2	158000000	158500000	11	0.168379
2	160500000	161000000	12	2	164500000	165000000	11	0.168379
2	161000000	161500000	3	2	179000000	179500000	11	0.168379
2	161500000	162000000	4	2	184000000	184500000	11	0.168379
2	162000000	162500000	3	2	184500000	185000000	11	0.168379
2	162500000	163000000	6	2	186000000	186500000	11	0.168379
2	163000000	163500000	3	2	188000000	188500000	11	0.168379
2	163500000	164000000	1	2	190500000	191000000	11	0.168379
2	164000000	164500000	5	2	194500000	195000000	11	0.168379
2	164500000	165000000	11	2	223500000	224000000	11	0.168379
2	165000000	165500000	6	2	232000000	232500000	11	0.168379
2	165500000	166000000	6	2	240000000	240500000	11	0.168379
2	166000000	166500000	7	2	243000000	243500000	11	0.168379
2	166500000	167000000	2	2	245000000	245500000	11	0.168379
2	167000000	167500000	8	2	250000000	250500000	11	0.168379
2	167500000	168000000	3	2	250500000	251000000	11	0.168379
2	168000000	168500000	6	2	252000000	252500000	11	0.168379
2	168500000	169000000	7	2	254000000	254500000	11	0.168379
2	169000000	169500000	8	2	256000000	256500000	11	0.168379
2	169500000	170000000	1	2	268000000	268500000	11	0.168379
2	170000000	170500000	12	2	274000000	274500000	11	0.168379
2	170500000	171000000	5	2	276500000	277000000	11	0.168379
2	171000000	171500000	13	2	277500000	278000000	11	0.168379
2	171500000	172000000	5	2	278000000	278500000	11	0.168379
2	172000000	172500000	6	2	283500000	284000000	11	0.168379
2	172500000	173000000	6	2	324500000	325000000	11	0.168379
2	173000000	173500000	7	2	328000000	328500000	11	0.168379
2	173500000	174000000	7	2	331500000	332000000	11	0.168379
2	174000000	174500000	10	2	332500000	333000000	11	0.168379
2	174500000	175000000	6	2	339500000	340000000	11	0.168379
2	175000000	175500000	4	2	362500000	363000000	11	0.168379
2	175500000	176000000	8	2	379500000	380000000	11	0.168379
2	176000000	176500000	5	2	380000000	380500000	11	0.168379
2	176500000	177000000	9	2	396000000	396500000	11	0.168379
2	177000000	177500000	6	2	398500000	399000000	11	0.168379
2	177500000	178000000	9	2	401000000	401500000	11	0.168379
2	178000000	178500000	6	2	428000000	428500000	11	0.168379
2	178500000	179000000	20	2	430500000	431000000	11	0.168379
2	179000000	179500000	11	2	435000000	435500000	11	0.168379
2	179500000	180000000	12	2	447000000	447500000	11	0.168379
2	180000000	180500000	6	2	455500000	456000000	11	0.168379
2	180500000	181000000	12	2	459000000	459500000	11	0.168379
2	181000000	181500000	10	3	12000000	12500000	11	0.168379
2	181500000	182000000	7	3	19000000	19500000	11	0.168379
2	182000000	182500000	8	3	21000000	21500000	11	0.168379
2	182500000	183000000	4	3	27000000	27500000	11	0.168379
2	183000000	183500000	6	3	32000000	32500000	11	0.168379
2	183500000	184000000	8	3	53000000	53500000	11	0.168379
2	184000000	184500000	11	3	73500000	74000000	11	0.168379
2	184500000	185000000	11	3	75500000	76000000	11	0.168379
2	185000000	185500000	5	3	85000000	85500000	11	0.168379
2	185500000	186000000	16	3	97000000	97500000	11	0.168379
2	186000000	186500000	11	3	103000000	103500000	11	0.168379
2	186500000	187000000	9	3	117500000	118000000	11	0.168379
2	187000000	187500000	15	3	118000000	118500000	11	0.168379
2	187500000	188000000	7	3	123500000	124000000	11	0.168379
2	188000000	188500000	11	3	126000000	126500000	11	0.168379
2	188500000	189000000	8	3	129000000	129500000	11	0.168379
2	189000000	189500000	1	3	135000000	135500000	11	0.168379
2	189500000	190000000	6	3	150500000	151000000	11	0.168379
2	190000000	190500000	8	3	152000000	152500000	11	0.168379
2	190500000	191000000	11	3	160500000	161000000	11	0.168379
2	191000000	191500000	13	3	165500000	166000000	11	0.168379
2	191500000	192000000	6	3	172500000	173000000	11	0.168379
2	192000000	192500000	9	3	188500000	189000000	11	0.168379
2	192500000	193000000	9	3	195000000	195500000	11	0.168379
2	193000000	193500000	14	3	200500000	201000000	11	0.168379
2	193500000	194000000	6	3	212000000	212500000	11	0.168379
2	194000000	194500000	0	3	215500000	216000000	11	0.168379
2	194500000	195000000	11	3	219500000	220000000	11	0.168379
2	195000000	195500000	8	3	227000000	227500000	11	0.168379
2	195500000	196000000	15	3	229000000	229500000	11	0.168379
2	196000000	196500000	10	3	232500000	233000000	11	0.168379
2	196500000	197000000	9	3	234000000	234500000	11	0.168379
2	197000000	197500000	10	3	238500000	239000000	11	0.168379
2	197500000	198000000	3	3	239000000	239500000	11	0.168379
2	198000000	198500000	9	3	243500000	244000000	11	0.168379
2	198500000	199000000	13	3	244000000	244500000	11	0.168379
2	199000000	199500000	6	3	255500000	256000000	11	0.168379
2	199500000	200000000	7	3	256000000	256500000	11	0.168379
2	200000000	200500000	6	3	258500000	259000000	11	0.168379
2	200500000	201000000	9	4	13500000	14000000	11	0.168379
2	201000000	201500000	8	4	22500000	23000000	11	0.168379
2	201500000	202000000	6	4	26500000	27000000	11	0.168379
2	202000000	202500000	12	4	43000000	43500000	11	0.168379
2	202500000	203000000	5	4	63000000	63500000	11	0.168379
2	203000000	203500000	3	4	66500000	67000000	11	0.168379
2	203500000	204000000	3	4	68500000	69000000	11	0.168379
2	204000000	204500000	6	4	88000000	88500000	11	0.168379
2	204500000	205000000	6	4	93500000	94000000	11	0.168379
2	205000000	205500000	5	4	94500000	95000000	11	0.168379
2	205500000	206000000	4	4	98000000	98500000	11	0.168379
2	206000000	206500000	3	4	125500000	126000000	11	0.168379
2	206500000	207000000	6	4	126000000	126500000	11	0.168379
2	207000000	207500000	10	4	128500000	129000000	11	0.168379
2	207500000	208000000	2	4	143500000	144000000	11	0.168379
2	208000000	208500000	1	4	144000000	144500000	11	0.168379
2	208500000	209000000	5	4	152500000	153000000	11	0.168379
2	209000000	209500000	4	4	156500000	157000000	11	0.168379
2	209500000	210000000	6	4	158500000	159000000	11	0.168379
2	210000000	210500000	0	4	164000000	164500000	11	0.168379
2	210500000	211000000	2	4	167500000	168000000	11	0.168379
2	211000000	211500000	4	4	177000000	177500000	11	0.168379
2	211500000	212000000	3	4	182000000	182500000	11	0.168379
2	212000000	212500000	0	4	188500000	189000000	11	0.168379
2	212500000	213000000	2	4	209500000	210000000	11	0.168379
2	213000000	213500000	5	4	211000000	211500000	11	0.168379
2	213500000	214000000	7	4	217000000	217500000	11	0.168379
2	214000000	214500000	7	4	224500000	225000000	11	0.168379
2	214500000	215000000	4	4	227000000	227500000	11	0.168379
2	215000000	215500000	2	4	227500000	228000000	11	0.168379
2	215500000	216000000	10	5	19000000	19500000	11	0.168379
2	216000000	216500000	7	5	24000000	24500000	11	0.168379
2	216500000	217000000	3	5	33500000	34000000	11	0.168379
2	217000000	217500000	4	5	34000000	34500000	11	0.168379
2	217500000	218000000	8	5	52000000	52500000	11	0.168379
2	218000000	218500000	3	5	61500000	62000000	11	0.168379
2	218500000	219000000	1	5	67500000	68000000	11	0.168379
2	219000000	219500000	6	5	75500000	76000000	11	0.168379
2	219500000	220000000	17	5	78500000	79000000	11	0.168379
2	220000000	220500000	2	5	81000000	81500000	11	0.168379
2	220500000	221000000	2	5	90000000	90500000	11	0.168379
2	221000000	221500000	6	5	96000000	96500000	11	0.168379
2	221500000	222000000	5	5	102500000	103000000	11	0.168379
2	222000000	222500000	9	5	105500000	106000000	11	0.168379
2	222500000	223000000	9	5	109500000	110000000	11	0.168379
2	223000000	223500000	8	5	111000000	111500000	11	0.168379
2	223500000	224000000	11	5	117500000	118000000	11	0.168379
2	224000000	224500000	5	5	121000000	121500000	11	0.168379
2	224500000	225000000	2	5	123500000	124000000	11	0.168379
2	225000000	225500000	8	5	128000000	128500000	11	0.168379
2	225500000	226000000	1	5	138000000	138500000	11	0.168379
2	226000000	226500000	17	5	138500000	139000000	11	0.168379
2	226500000	227000000	4	5	143500000	144000000	11	0.168379
2	227000000	227500000	7	5	149500000	150000000	11	0.168379
2	227500000	228000000	5	5	158500000	159000000	11	0.168379
2	228000000	228500000	5	5	161000000	161500000	11	0.168379
2	228500000	229000000	10	5	162000000	162500000	11	0.168379
2	229000000	229500000	15	5	168500000	169000000	11	0.168379
2	229500000	230000000	5	5	185000000	185500000	11	0.168379
2	230000000	230500000	5	6	0	500000	11	0.168379
2	230500000	231000000	7	6	4000000	4500000	11	0.168379
2	231000000	231500000	3	6	9500000	10000000	11	0.168379
2	231500000	232000000	14	6	21000000	21500000	11	0.168379
2	232000000	232500000	11	6	24000000	24500000	11	0.168379
2	232500000	233000000	15	6	50500000	51000000	11	0.168379
2	233000000	233500000	5	6	55000000	55500000	11	0.168379
2	233500000	234000000	12	6	59000000	59500000	11	0.168379
2	234000000	234500000	16	6	59500000	60000000	11	0.168379
2	234500000	235000000	3	6	61000000	61500000	11	0.168379
2	235000000	235500000	13	6	62000000	62500000	11	0.168379
2	235500000	236000000	8	6	68000000	68500000	11	0.168379
2	236000000	236500000	7	6	88500000	89000000	11	0.168379
2	236500000	237000000	7	6	90500000	91000000	11	0.168379
2	237000000	237500000	7	6	92000000	92500000	11	0.168379
2	237500000	238000000	6	6	92500000	93000000	11	0.168379
2	238000000	238500000	3	6	104000000	104500000	11	0.168379
2	238500000	239000000	14	6	105000000	105500000	11	0.168379
2	239000000	239500000	4	6	111000000	111500000	11	0.168379
2	239500000	240000000	2	6	114500000	115000000	11	0.168379
2	240000000	240500000	11	6	119500000	120000000	11	0.168379
2	240500000	241000000	9	6	120500000	121000000	11	0.168379
2	241000000	241500000	10	6	121000000	121500000	11	0.168379
2	241500000	242000000	18	6	122000000	122500000	11	0.168379
2	242000000	242500000	7	6	129000000	129500000	11	0.168379
2	242500000	243000000	17	6	130000000	130500000	11	0.168379
2	243000000	243500000	11	6	148000000	148500000	11	0.168379
2	243500000	244000000	10	7	9000000	9500000	11	0.168379
2	244000000	244500000	17	7	24500000	25000000	11	0.168379
2	244500000	245000000	10	7	42000000	42500000	11	0.168379
2	245000000	245500000	11	7	48000000	48500000	11	0.168379
2	245500000	246000000	12	7	52500000	53000000	11	0.168379
2	246000000	246500000	13	7	67500000	68000000	11	0.168379
2	246500000	247000000	18	7	76500000	77000000	11	0.168379
2	247000000	247500000	12	7	79500000	80000000	11	0.168379
2	247500000	248000000	10	7	81500000	82000000	11	0.168379
2	248000000	248500000	8	7	87000000	87500000	11	0.168379
2	248500000	249000000	13	7	108000000	108500000	11	0.168379
2	249000000	249500000	5	7	117000000	117500000	11	0.168379
2	249500000	250000000	5	8	3500000	4000000	11	0.168379
2	250000000	250500000	11	8	36500000	37000000	11	0.168379
2	250500000	251000000	11	8	46500000	47000000	11	0.168379
2	251000000	251500000	10	8	65500000	66000000	11	0.168379
2	251500000	252000000	16	8	70000000	70500000	11	0.168379
2	252000000	252500000	11	8	72000000	72500000	11	0.168379
2	252500000	253000000	16	8	76000000	76500000	11	0.168379
2	253000000	253500000	13	8	87000000	87500000	11	0.168379
2	253500000	254000000	16	8	88500000	89000000	11	0.168379
2	254000000	254500000	11	9	4000000	4500000	11	0.168379
2	254500000	255000000	8	9	7500000	8000000	11	0.168379
2	255000000	255500000	8	X	15000000	15500000	11	0.168379
2	255500000	256000000	12	X	28000000	28500000	11	0.168379
2	256000000	256500000	11	X	34000000	34500000	11	0.168379
2	256500000	257000000	6	X	66500000	67000000	11	0.168379
2	257000000	257500000	8	X	117500000	118000000	11	0.168379
2	257500000	258000000	13	10	4500000	5000000	10	0.0438003
2	258000000	258500000	17	1_1	2500000	3000000	10	0.0438003
2	258500000	259000000	5	1_1	3500000	4000000	10	0.0438003
2	259000000	259500000	4	1_1	8000000	8500000	10	0.0438003
2	259500000	260000000	14	1_1	21500000	22000000	10	0.0438003
2	260000000	260500000	7	1_1	25000000	25500000	10	0.0438003
2	260500000	261000000	12	1_1	27500000	28000000	10	0.0438003
2	261000000	261500000	10	1_1	31000000	31500000	10	0.0438003
2	261500000	262000000	9	1_1	32500000	33000000	10	0.0438003
2	262000000	262500000	9	1_1	38000000	38500000	10	0.0438003
2	262500000	263000000	4	1_1	49500000	50000000	10	0.0438003
2	263000000	263500000	8	1_1	59000000	59500000	10	0.0438003
2	263500000	264000000	14	1_1	60500000	61000000	10	0.0438003
2	264000000	264500000	4	1_1	64000000	64500000	10	0.0438003
2	264500000	265000000	5	1_1	65500000	66000000	10	0.0438003
2	265000000	265500000	12	1_1	85500000	86000000	10	0.0438003
2	265500000	266000000	5	1_1	86000000	86500000	10	0.0438003
2	266000000	266500000	9	1_1	92000000	92500000	10	0.0438003
2	266500000	267000000	9	1_1	99000000	99500000	10	0.0438003
2	267000000	267500000	5	1_1	111500000	112000000	10	0.0438003
2	267500000	268000000	14	1_1	117500000	118000000	10	0.0438003
2	268000000	268500000	11	1_1	120000000	120500000	10	0.0438003
2	268500000	269000000	8	1_1	128500000	129000000	10	0.0438003
2	269000000	269500000	14	1_1	139500000	140000000	10	0.0438003
2	269500000	270000000	9	1_1	150000000	150500000	10	0.0438003
2	270000000	270500000	7	1_1	171500000	172000000	10	0.0438003
2	270500000	271000000	14	1_1	181500000	182000000	10	0.0438003
2	271000000	271500000	15	1_1	182000000	182500000	10	0.0438003
2	271500000	272000000	16	1_1	185000000	185500000	10	0.0438003
2	272000000	272500000	13	1_1	187500000	188000000	10	0.0438003
2	272500000	273000000	14	1_1	190000000	190500000	10	0.0438003
2	273000000	273500000	9	1_1	196000000	196500000	10	0.0438003
2	273500000	274000000	12	1_1	197500000	198000000	10	0.0438003
2	274000000	274500000	11	1_1	211000000	211500000	10	0.0438003
2	274500000	275000000	10	1_1	214000000	214500000	10	0.0438003
2	275000000	275500000	2	1_1	215500000	216000000	10	0.0438003
2	275500000	276000000	8	1_1	226500000	227000000	10	0.0438003
2	276000000	276500000	7	1_1	238500000	239000000	10	0.0438003
2	276500000	277000000	11	1_1	241000000	241500000	10	0.0438003
2	277000000	277500000	7	1_1	241500000	242000000	10	0.0438003
2	277500000	278000000	11	1_1	243000000	243500000	10	0.0438003
2	278000000	278500000	11	1_1	249000000	249500000	10	0.0438003
2	278500000	279000000	25	1_1	251000000	251500000	10	0.0438003
2	279000000	279500000	21	1_1	253000000	253500000	10	0.0438003
2	279500000	280000000	24	1_1	258500000	259000000	10	0.0438003
2	280000000	280500000	16	1_1	264000000	264500000	10	0.0438003
2	280500000	281000000	14	1_1	264500000	265000000	10	0.0438003
2	281000000	281500000	6	1_1	265000000	265500000	10	0.0438003
2	281500000	282000000	14	1_1	267500000	268000000	10	0.0438003
2	282000000	282500000	16	1_1	269000000	269500000	10	0.0438003
2	282500000	283000000	15	1_2	6000000	6500000	10	0.0438003
2	283000000	283500000	13	1_2	22500000	23000000	10	0.0438003
2	283500000	284000000	11	1_2	29000000	29500000	10	0.0438003
2	284000000	284500000	20	1_2	32500000	33000000	10	0.0438003
2	284500000	285000000	14	1_2	39500000	40000000	10	0.0438003
2	285000000	285500000	6	1_2	44500000	45000000	10	0.0438003
2	285500000	286000000	6	1_2	48500000	49000000	10	0.0438003
2	286000000	286500000	13	1_2	57000000	57500000	10	0.0438003
2	286500000	287000000	13	1_2	59000000	59500000	10	0.0438003
2	287000000	287500000	17	1_2	63000000	63500000	10	0.0438003
2	287500000	288000000	3	1_2	63500000	64000000	10	0.0438003
2	288000000	288500000	4	1_2	66500000	67000000	10	0.0438003
2	288500000	289000000	4	1_2	72500000	73000000	10	0.0438003
2	289000000	289500000	2	1_2	78500000	79000000	10	0.0438003
2	289500000	290000000	5	1_2	95500000	96000000	10	0.0438003
2	290000000	290500000	7	1_2	100000000	100500000	10	0.0438003
2	290500000	291000000	4	1_2	102000000	102500000	10	0.0438003
2	291000000	291500000	4	1_2	108500000	109000000	10	0.0438003
2	291500000	292000000	6	1_2	114000000	114500000	10	0.0438003
2	292000000	292500000	2	1_2	114500000	115000000	10	0.0438003
2	292500000	293000000	6	1_2	115000000	115500000	10	0.0438003
2	293000000	293500000	4	1_2	125500000	126000000	10	0.0438003
2	293500000	294000000	4	1_2	136500000	137000000	10	0.0438003
2	294000000	294500000	3	1_2	143000000	143500000	10	0.0438003
2	294500000	295000000	4	1_2	144000000	144500000	10	0.0438003
2	295000000	295500000	3	1_2	156500000	157000000	10	0.0438003
2	295500000	296000000	7	1_2	166000000	166500000	10	0.0438003
2	296000000	296500000	5	1_2	177500000	178000000	10	0.0438003
2	296500000	297000000	4	1_2	192000000	192500000	10	0.0438003
2	297000000	297500000	4	1_2	193500000	194000000	10	0.0438003
2	297500000	298000000	3	1_2	201500000	202000000	10	0.0438003
2	298000000	298500000	7	1_2	203500000	204000000	10	0.0438003
2	298500000	299000000	6	1_2	218000000	218500000	10	0.0438003
2	299000000	299500000	6	1_2	219000000	219500000	10	0.0438003
2	299500000	300000000	3	1_2	241500000	242000000	10	0.0438003
2	300000000	300500000	2	1_2	247500000	248000000	10	0.0438003
2	300500000	301000000	8	1_2	253000000	253500000	10	0.0438003
2	301000000	301500000	1	1_2	256500000	257000000	10	0.0438003
2	301500000	302000000	7	1_2	262000000	262500000	10	0.0438003
2	302000000	302500000	4	1_2	264000000	264500000	10	0.0438003
2	302500000	303000000	5	1_2	267500000	268000000	10	0.0438003
2	303000000	303500000	2	1_2	268000000	268500000	10	0.0438003
2	303500000	304000000	5	2	2000000	2500000	10	0.0438003
2	304000000	304500000	5	2	7500000	8000000	10	0.0438003
2	304500000	305000000	9	2	12000000	12500000	10	0.0438003
2	305000000	305500000	10	2	18500000	19000000	10	0.0438003
2	305500000	306000000	5	2	36000000	36500000	10	0.0438003
2	306000000	306500000	1	2	39000000	39500000	10	0.0438003
2	306500000	307000000	4	2	45000000	45500000	10	0.0438003
2	307000000	307500000	3	2	46000000	46500000	10	0.0438003
2	307500000	308000000	1	2	65000000	65500000	10	0.0438003
2	308000000	308500000	5	2	66000000	66500000	10	0.0438003
2	308500000	309000000	8	2	72000000	72500000	10	0.0438003
2	309000000	309500000	3	2	74500000	75000000	10	0.0438003
2	309500000	310000000	6	2	80000000	80500000	10	0.0438003
2	310000000	310500000	7	2	83500000	84000000	10	0.0438003
2	310500000	311000000	2	2	85000000	85500000	10	0.0438003
2	311000000	311500000	5	2	90500000	91000000	10	0.0438003
2	311500000	312000000	3	2	139000000	139500000	10	0.0438003
2	312000000	312500000	6	2	174000000	174500000	10	0.0438003
2	312500000	313000000	7	2	181000000	181500000	10	0.0438003
2	313000000	313500000	7	2	196000000	196500000	10	0.0438003
2	313500000	314000000	6	2	197000000	197500000	10	0.0438003
2	314000000	314500000	5	2	207000000	207500000	10	0.0438003
2	314500000	315000000	9	2	215500000	216000000	10	0.0438003
2	315000000	315500000	10	2	228500000	229000000	10	0.0438003
2	315500000	316000000	6	2	241000000	241500000	10	0.0438003
2	316000000	316500000	4	2	243500000	244000000	10	0.0438003
2	316500000	317000000	7	2	244500000	245000000	10	0.0438003
2	317000000	317500000	9	2	247500000	248000000	10	0.0438003
2	317500000	318000000	14	2	251000000	251500000	10	0.0438003
2	318000000	318500000	14	2	261000000	261500000	10	0.0438003
2	318500000	319000000	21	2	274500000	275000000	10	0.0438003
2	319000000	319500000	17	2	305000000	305500000	10	0.0438003
2	319500000	320000000	14	2	315000000	315500000	10	0.0438003
2	320000000	320500000	12	2	335500000	336000000	10	0.0438003
2	320500000	321000000	12	2	337500000	338000000	10	0.0438003
2	321000000	321500000	6	2	341000000	341500000	10	0.0438003
2	321500000	322000000	8	2	357000000	357500000	10	0.0438003
2	322000000	322500000	8	2	374500000	375000000	10	0.0438003
2	322500000	323000000	18	2	386500000	387000000	10	0.0438003
2	323000000	323500000	12	2	390000000	390500000	10	0.0438003
2	323500000	324000000	6	2	409000000	409500000	10	0.0438003
2	324000000	324500000	6	2	426500000	427000000	10	0.0438003
2	324500000	325000000	11	2	440500000	441000000	10	0.0438003
2	325000000	325500000	5	2	441000000	441500000	10	0.0438003
2	325500000	326000000	13	2	442500000	443000000	10	0.0438003
2	326000000	326500000	4	2	443000000	443500000	10	0.0438003
2	326500000	327000000	7	2	443500000	444000000	10	0.0438003
2	327000000	327500000	12	2	444000000	444500000	10	0.0438003
2	327500000	328000000	13	2	461000000	461500000	10	0.0438003
2	328000000	328500000	11	3	5500000	6000000	10	0.0438003
2	328500000	329000000	16	3	34500000	35000000	10	0.0438003
2	329000000	329500000	16	3	55000000	55500000	10	0.0438003
2	329500000	330000000	14	3	84000000	84500000	10	0.0438003
2	330000000	330500000	14	3	85500000	86000000	10	0.0438003
2	330500000	331000000	14	3	86500000	87000000	10	0.0438003
2	331000000	331500000	18	3	89000000	89500000	10	0.0438003
2	331500000	332000000	11	3	96500000	97000000	10	0.0438003
2	332000000	332500000	5	3	99000000	99500000	10	0.0438003
2	332500000	333000000	11	3	119000000	119500000	10	0.0438003
2	333000000	333500000	6	3	119500000	120000000	10	0.0438003
2	333500000	334000000	4	3	121000000	121500000	10	0.0438003
2	334000000	334500000	12	3	125000000	125500000	10	0.0438003
2	334500000	335000000	14	3	132500000	133000000	10	0.0438003
2	335000000	335500000	7	3	135500000	136000000	10	0.0438003
2	335500000	336000000	10	3	139000000	139500000	10	0.0438003
2	336000000	336500000	4	3	142000000	142500000	10	0.0438003
2	336500000	337000000	16	3	149000000	149500000	10	0.0438003
2	337000000	337500000	12	3	156000000	156500000	10	0.0438003
2	337500000	338000000	10	3	169500000	170000000	10	0.0438003
2	338000000	338500000	14	3	173500000	174000000	10	0.0438003
2	338500000	339000000	13	3	177500000	178000000	10	0.0438003
2	339000000	339500000	22	3	182000000	182500000	10	0.0438003
2	339500000	340000000	11	3	201000000	201500000	10	0.0438003
2	340000000	340500000	12	3	207000000	207500000	10	0.0438003
2	340500000	341000000	12	3	210500000	211000000	10	0.0438003
2	341000000	341500000	10	3	211500000	212000000	10	0.0438003
2	341500000	342000000	9	3	220500000	221000000	10	0.0438003
2	342000000	342500000	7	3	221000000	221500000	10	0.0438003
2	342500000	343000000	12	3	226500000	227000000	10	0.0438003
2	343000000	343500000	17	3	231500000	232000000	10	0.0438003
2	343500000	344000000	12	3	249000000	249500000	10	0.0438003
2	344000000	344500000	12	3	252000000	252500000	10	0.0438003
2	344500000	345000000	8	3	263000000	263500000	10	0.0438003
2	345000000	345500000	13	3	264500000	265000000	10	0.0438003
2	345500000	346000000	6	3	265500000	266000000	10	0.0438003
2	346000000	346500000	5	3	276000000	276500000	10	0.0438003
2	346500000	347000000	9	3	279500000	280000000	10	0.0438003
2	347000000	347500000	3	4	12000000	12500000	10	0.0438003
2	347500000	348000000	5	4	15500000	16000000	10	0.0438003
2	348000000	348500000	4	4	26000000	26500000	10	0.0438003
2	348500000	349000000	1	4	28000000	28500000	10	0.0438003
2	349000000	349500000	8	4	36500000	37000000	10	0.0438003
2	349500000	350000000	3	4	40000000	40500000	10	0.0438003
2	350000000	350500000	3	4	62500000	63000000	10	0.0438003
2	350500000	351000000	7	4	65000000	65500000	10	0.0438003
2	351000000	351500000	5	4	77500000	78000000	10	0.0438003
2	351500000	352000000	6	4	85500000	86000000	10	0.0438003
2	352000000	352500000	6	4	87500000	88000000	10	0.0438003
2	352500000	353000000	7	4	91500000	92000000	10	0.0438003
2	353000000	353500000	7	4	114500000	115000000	10	0.0438003
2	353500000	354000000	6	4	117000000	117500000	10	0.0438003
2	354000000	354500000	5	4	140500000	141000000	10	0.0438003
2	354500000	355000000	1	4	146000000	146500000	10	0.0438003
2	355000000	355500000	7	4	151500000	152000000	10	0.0438003
2	355500000	356000000	5	4	155500000	156000000	10	0.0438003
2	356000000	356500000	6	4	174000000	174500000	10	0.0438003
2	356500000	357000000	4	4	178000000	178500000	10	0.0438003
2	357000000	357500000	10	4	180500000	181000000	10	0.0438003
2	357500000	358000000	3	4	185500000	186000000	10	0.0438003
2	358000000	358500000	4	4	187500000	188000000	10	0.0438003
2	358500000	359000000	3	4	196000000	196500000	10	0.0438003
2	359000000	359500000	8	4	196500000	197000000	10	0.0438003
2	359500000	360000000	6	4	203000000	203500000	10	0.0438003
2	360000000	360500000	4	4	205000000	205500000	10	0.0438003
2	360500000	361000000	16	4	210500000	211000000	10	0.0438003
2	361000000	361500000	4	4	212000000	212500000	10	0.0438003
2	361500000	362000000	6	4	213000000	213500000	10	0.0438003
2	362000000	362500000	8	4	222000000	222500000	10	0.0438003
2	362500000	363000000	11	4	222500000	223000000	10	0.0438003
2	363000000	363500000	7	4	229500000	230000000	10	0.0438003
2	363500000	364000000	8	5	1000000	1500000	10	0.0438003
2	364000000	364500000	12	5	12500000	13000000	10	0.0438003
2	364500000	365000000	7	5	18500000	19000000	10	0.0438003
2	365000000	365500000	8	5	26500000	27000000	10	0.0438003
2	365500000	366000000	7	5	32000000	32500000	10	0.0438003
2	366000000	366500000	6	5	45000000	45500000	10	0.0438003
2	366500000	367000000	6	5	47500000	48000000	10	0.0438003
2	367000000	367500000	5	5	50500000	51000000	10	0.0438003
2	367500000	368000000	5	5	51000000	51500000	10	0.0438003
2	368000000	368500000	3	5	68000000	68500000	10	0.0438003
2	368500000	369000000	7	5	75000000	75500000	10	0.0438003
2	369000000	369500000	8	5	78000000	78500000	10	0.0438003
2	369500000	370000000	6	5	90500000	91000000	10	0.0438003
2	370000000	370500000	7	5	98000000	98500000	10	0.0438003
2	370500000	371000000	3	5	116000000	116500000	10	0.0438003
2	371000000	371500000	6	5	116500000	117000000	10	0.0438003
2	371500000	372000000	2	5	117000000	117500000	10	0.0438003
2	372000000	372500000	4	5	119000000	119500000	10	0.0438003
2	372500000	373000000	3	5	124000000	124500000	10	0.0438003
2	373000000	373500000	6	5	127000000	127500000	10	0.0438003
2	373500000	374000000	2	5	130000000	130500000	10	0.0438003
2	374000000	374500000	3	5	130500000	131000000	10	0.0438003
2	374500000	375000000	10	5	141000000	141500000	10	0.0438003
2	375000000	375500000	7	5	141500000	142000000	10	0.0438003
2	375500000	376000000	5	5	144000000	144500000	10	0.0438003
2	376000000	376500000	4	5	151000000	151500000	10	0.0438003
2	376500000	377000000	6	5	163000000	163500000	10	0.0438003
2	377000000	377500000	3	5	167000000	167500000	10	0.0438003
2	377500000	378000000	6	5	169500000	170000000	10	0.0438003
2	378000000	378500000	5	5	189000000	189500000	10	0.0438003
2	378500000	379000000	8	5	193000000	193500000	10	0.0438003
2	379000000	379500000	8	6	22500000	23000000	10	0.0438003
2	379500000	380000000	11	6	34500000	35000000	10	0.0438003
2	380000000	380500000	11	6	35000000	35500000	10	0.0438003
2	380500000	381000000	5	6	45000000	45500000	10	0.0438003
2	381000000	381500000	6	6	47500000	48000000	10	0.0438003
2	381500000	382000000	7	6	49500000	50000000	10	0.0438003
2	382000000	382500000	2	6	63000000	63500000	10	0.0438003
2	382500000	383000000	5	6	70500000	71000000	10	0.0438003
2	383000000	383500000	5	6	71000000	71500000	10	0.0438003
2	383500000	384000000	5	6	72500000	73000000	10	0.0438003
2	384000000	384500000	5	6	75000000	75500000	10	0.0438003
2	384500000	385000000	12	6	76500000	77000000	10	0.0438003
2	385000000	385500000	6	6	77000000	77500000	10	0.0438003
2	385500000	386000000	4	6	78000000	78500000	10	0.0438003
2	386000000	386500000	7	6	83000000	83500000	10	0.0438003
2	386500000	387000000	10	6	97000000	97500000	10	0.0438003
2	387000000	387500000	6	6	100000000	100500000	10	0.0438003
2	387500000	388000000	9	6	101000000	101500000	10	0.0438003
2	388000000	388500000	5	6	101500000	102000000	10	0.0438003
2	388500000	389000000	7	6	127500000	128000000	10	0.0438003
2	389000000	389500000	8	6	132000000	132500000	10	0.0438003
2	389500000	390000000	7	6	132500000	133000000	10	0.0438003
2	390000000	390500000	10	6	147500000	148000000	10	0.0438003
2	390500000	391000000	9	7	2000000	2500000	10	0.0438003
2	391000000	391500000	6	7	15000000	15500000	10	0.0438003
2	391500000	392000000	13	7	22500000	23000000	10	0.0438003
2	392000000	392500000	5	7	29500000	30000000	10	0.0438003
2	392500000	393000000	3	7	37000000	37500000	10	0.0438003
2	393000000	393500000	8	7	39000000	39500000	10	0.0438003
2	393500000	394000000	7	7	43500000	44000000	10	0.0438003
2	394000000	394500000	7	7	47500000	48000000	10	0.0438003
2	394500000	395000000	7	7	85000000	85500000	10	0.0438003
2	395000000	395500000	8	7	96000000	96500000	10	0.0438003
2	395500000	396000000	8	7	99000000	99500000	10	0.0438003
2	396000000	396500000	11	7	100000000	100500000	10	0.0438003
2	396500000	397000000	5	7	101000000	101500000	10	0.0438003
2	397000000	397500000	21	7	109500000	110000000	10	0.0438003
2	397500000	398000000	7	7	113000000	113500000	10	0.0438003
2	398000000	398500000	8	7	114500000	115000000	10	0.0438003
2	398500000	399000000	11	7	116500000	117000000	10	0.0438003
2	399000000	399500000	9	7	123500000	124000000	10	0.0438003
2	399500000	400000000	15	7	132000000	132500000	10	0.0438003
2	400000000	400500000	8	8	2500000	3000000	10	0.0438003
2	400500000	401000000	7	8	6000000	6500000	10	0.0438003
2	401000000	401500000	11	8	13500000	14000000	10	0.0438003
2	401500000	402000000	6	8	15500000	16000000	10	0.0438003
2	402000000	402500000	6	8	16000000	16500000	10	0.0438003
2	402500000	403000000	6	8	20500000	21000000	10	0.0438003
2	403000000	403500000	3	8	27000000	27500000	10	0.0438003
2	403500000	404000000	5	8	31500000	32000000	10	0.0438003
2	404000000	404500000	12	8	40500000	41000000	10	0.0438003
2	404500000	405000000	9	8	78000000	78500000	10	0.0438003
2	405000000	405500000	6	8	90000000	90500000	10	0.0438003
2	405500000	406000000	4	8	92000000	92500000	10	0.0438003
2	406000000	406500000	5	8	93500000	94000000	10	0.0438003
2	406500000	407000000	5	8	97000000	97500000	10	0.0438003
2	407000000	407500000	3	9	19000000	19500000	10	0.0438003
2	407500000	408000000	6	X	3500000	4000000	10	0.0438003
2	408000000	408500000	16	X	12500000	13000000	10	0.0438003
2	408500000	409000000	18	X	17000000	17500000	10	0.0438003
2	409000000	409500000	10	X	74500000	75000000	10	0.0438003
2	409500000	410000000	4	X	117000000	117500000	10	0.0438003
2	410000000	410500000	2	10	2000000	2500000	9	-0.0807788
2	410500000	411000000	5	10	9000000	9500000	9	-0.0807788
2	411000000	411500000	16	10	14000000	14500000	9	-0.0807788
2	411500000	412000000	7	10	14500000	15000000	9	-0.0807788
2	412000000	412500000	9	10	17000000	17500000	9	-0.0807788
2	412500000	413000000	9	1_1	1000000	1500000	9	-0.0807788
2	413000000	413500000	14	1_1	10500000	11000000	9	-0.0807788
2	413500000	414000000	15	1_1	14500000	15000000	9	-0.0807788
2	414000000	414500000	6	1_1	22500000	23000000	9	-0.0807788
2	414500000	415000000	14	1_1	36000000	36500000	9	-0.0807788
2	415000000	415500000	12	1_1	41500000	42000000	9	-0.0807788
2	415500000	416000000	9	1_1	50000000	50500000	9	-0.0807788
2	416000000	416500000	8	1_1	56000000	56500000	9	-0.0807788
2	416500000	417000000	14	1_1	56500000	57000000	9	-0.0807788
2	417000000	417500000	7	1_1	59500000	60000000	9	-0.0807788
2	417500000	418000000	5	1_1	74000000	74500000	9	-0.0807788
2	418000000	418500000	8	1_1	77500000	78000000	9	-0.0807788
2	418500000	419000000	1	1_1	80500000	81000000	9	-0.0807788
2	419000000	419500000	5	1_1	82500000	83000000	9	-0.0807788
2	419500000	420000000	7	1_1	85000000	85500000	9	-0.0807788
2	420000000	420500000	23	1_1	95000000	95500000	9	-0.0807788
2	420500000	421000000	9	1_1	100000000	100500000	9	-0.0807788
2	421000000	421500000	2	1_1	125000000	125500000	9	-0.0807788
2	421500000	422000000	5	1_1	129500000	130000000	9	-0.0807788
2	422000000	422500000	12	1_1	131000000	131500000	9	-0.0807788
2	422500000	423000000	7	1_1	132000000	132500000	9	-0.0807788
2	423000000	423500000	3	1_1	144000000	144500000	9	-0.0807788
2	423500000	424000000	9	1_1	151000000	151500000	9	-0.0807788
2	424000000	424500000	5	1_1	154500000	155000000	9	-0.0807788
2	424500000	425000000	18	1_1	163000000	163500000	9	-0.0807788
2	425000000	425500000	7	1_1	174500000	175000000	9	-0.0807788
2	425500000	426000000	5	1_1	176500000	177000000	9	-0.0807788
2	426000000	426500000	9	1_1	179000000	179500000	9	-0.0807788
2	426500000	427000000	10	1_1	188500000	189000000	9	-0.0807788
2	427000000	427500000	5	1_1	191000000	191500000	9	-0.0807788
2	427500000	428000000	7	1_1	198000000	198500000	9	-0.0807788
2	428000000	428500000	11	1_1	199000000	199500000	9	-0.0807788
2	428500000	429000000	9	1_1	201000000	201500000	9	-0.0807788
2	429000000	429500000	5	1_1	207000000	207500000	9	-0.0807788
2	429500000	430000000	13	1_1	208000000	208500000	9	-0.0807788
2	430000000	430500000	8	1_1	210500000	211000000	9	-0.0807788
2	430500000	431000000	11	1_1	211500000	212000000	9	-0.0807788
2	431000000	431500000	8	1_1	212000000	212500000	9	-0.0807788
2	431500000	432000000	15	1_1	213000000	213500000	9	-0.0807788
2	432000000	432500000	7	1_1	221500000	222000000	9	-0.0807788
2	432500000	433000000	13	1_1	226000000	226500000	9	-0.0807788
2	433000000	433500000	13	1_1	227000000	227500000	9	-0.0807788
2	433500000	434000000	9	1_1	240000000	240500000	9	-0.0807788
2	434000000	434500000	5	1_1	250500000	251000000	9	-0.0807788
2	434500000	435000000	9	1_1	252500000	253000000	9	-0.0807788
2	435000000	435500000	11	1_1	253500000	254000000	9	-0.0807788
2	435500000	436000000	8	1_1	254500000	255000000	9	-0.0807788
2	436000000	436500000	7	1_1	260500000	261000000	9	-0.0807788
2	436500000	437000000	4	1_1	263000000	263500000	9	-0.0807788
2	437000000	437500000	6	1_1	268000000	268500000	9	-0.0807788
2	437500000	438000000	12	1_2	1000000	1500000	9	-0.0807788
2	438000000	438500000	6	1_2	2000000	2500000	9	-0.0807788
2	438500000	439000000	3	1_2	5000000	5500000	9	-0.0807788
2	439000000	439500000	6	1_2	13000000	13500000	9	-0.0807788
2	439500000	440000000	15	1_2	16500000	17000000	9	-0.0807788
2	440000000	440500000	22	1_2	21500000	22000000	9	-0.0807788
2	440500000	441000000	10	1_2	23000000	23500000	9	-0.0807788
2	441000000	441500000	10	1_2	23500000	24000000	9	-0.0807788
2	441500000	442000000	9	1_2	24500000	25000000	9	-0.0807788
2	442000000	442500000	8	1_2	35000000	35500000	9	-0.0807788
2	442500000	443000000	10	1_2	54500000	55000000	9	-0.0807788
2	443000000	443500000	10	1_2	55500000	56000000	9	-0.0807788
2	443500000	444000000	10	1_2	56500000	57000000	9	-0.0807788
2	444000000	444500000	10	1_2	58000000	58500000	9	-0.0807788
2	444500000	445000000	6	1_2	65000000	65500000	9	-0.0807788
2	445000000	445500000	5	1_2	67000000	67500000	9	-0.0807788
2	445500000	446000000	13	1_2	70000000	70500000	9	-0.0807788
2	446000000	446500000	13	1_2	84500000	85000000	9	-0.0807788
2	446500000	447000000	7	1_2	85500000	86000000	9	-0.0807788
2	447000000	447500000	11	1_2	88000000	88500000	9	-0.0807788
2	447500000	448000000	8	1_2	89000000	89500000	9	-0.0807788
[truncated: 2,605 more rows]

## Sheet: S16
Table S16: Control Day 12 biogenesis frequencies. Full details of eccDNA biogenesis frequencies shown chronologically (left) and ranked (right).
Chronological				Ranked
Chr	Start	Stop	Frequency	Chr	Start	Stop	Frequency	Z Score
1_1	0	500000	3	9	15000000	15500000	69	20.2278
1_1	500000	1000000	1	9	14500000	15000000	65	18.9992
1_1	1000000	1500000	3	7	134000000	134359064	61	17.7707
1_1	1500000	2000000	8	9	15500000	16000000	52	15.0064
1_1	2000000	2500000	0	10	25500000	26000000	49	14.085
1_1	2500000	3000000	2	10	25000000	25500000	35	9.78504
1_1	3000000	3500000	1	9	14000000	14500000	34	9.4779
1_1	3500000	4000000	2	X	106500000	107000000	32	8.86362
1_1	4000000	4500000	4	1_2	196000000	196500000	30	8.24934
1_1	4500000	5000000	9	2	41000000	41500000	28	7.63506
1_1	5000000	5500000	2	9	13500000	14000000	27	7.32792
1_1	5500000	6000000	1	9	16000000	16500000	24	6.4065
1_1	6000000	6500000	0	10	21000000	21500000	23	6.09936
1_1	6500000	7000000	5	1_2	195500000	196000000	18	4.56366
1_1	7000000	7500000	0	8	61000000	61500000	18	4.56366
1_1	7500000	8000000	3	9	16500000	17000000	18	4.56366
1_1	8000000	8500000	0	10	21500000	22000000	17	4.25652
1_1	8500000	9000000	2	10	23500000	24000000	17	4.25652
1_1	9000000	9500000	4	1_2	32000000	32500000	17	4.25652
1_1	9500000	10000000	0	1_2	195000000	195500000	17	4.25652
1_1	10000000	10500000	4	2	34500000	35000000	17	4.25652
1_1	10500000	11000000	2	4	72500000	73000000	17	4.25652
1_1	11000000	11500000	1	1_1	197500000	198000000	15	3.64224
1_1	11500000	12000000	3	3	13000000	13500000	15	3.64224
1_1	12000000	12500000	1	3	114500000	115000000	15	3.64224
1_1	12500000	13000000	6	3	235500000	236000000	15	3.64224
1_1	13000000	13500000	2	4	15000000	15500000	15	3.64224
1_1	13500000	14000000	3	1_1	41000000	41500000	14	3.3351
1_1	14000000	14500000	3	1_2	221000000	221500000	14	3.3351
1_1	14500000	15000000	2	3	43500000	44000000	14	3.3351
1_1	15000000	15500000	4	3	78500000	79000000	14	3.3351
1_1	15500000	16000000	4	4	4500000	5000000	14	3.3351
1_1	16000000	16500000	6	4	135000000	135500000	14	3.3351
1_1	16500000	17000000	1	5	159000000	159500000	14	3.3351
1_1	17000000	17500000	5	9	13000000	13500000	14	3.3351
1_1	17500000	18000000	3	10	22000000	22500000	13	3.02795
1_1	18000000	18500000	0	10	24000000	24500000	13	3.02795
1_1	18500000	19000000	2	1_1	93000000	93500000	13	3.02795
1_1	19000000	19500000	5	4	3500000	4000000	13	3.02795
1_1	19500000	20000000	6	6	79500000	80000000	13	3.02795
1_1	20000000	20500000	4	10	24500000	25000000	12	2.72081
1_1	20500000	21000000	3	1_1	121500000	122000000	12	2.72081
1_1	21000000	21500000	1	1_1	193500000	194000000	12	2.72081
1_1	21500000	22000000	0	3	45000000	45500000	12	2.72081
1_1	22000000	22500000	3	3	113500000	114000000	12	2.72081
1_1	22500000	23000000	2	3	129500000	130000000	12	2.72081
1_1	23000000	23500000	6	3	153500000	154000000	12	2.72081
1_1	23500000	24000000	5	4	3000000	3500000	12	2.72081
1_1	24000000	24500000	4	4	120000000	120500000	12	2.72081
1_1	24500000	25000000	2	4	220000000	220500000	12	2.72081
1_1	25000000	25500000	0	6	38000000	38500000	12	2.72081
1_1	25500000	26000000	6	8	46000000	46500000	12	2.72081
1_1	26000000	26500000	4	10	18500000	19000000	11	2.41367
1_1	26500000	27000000	0	10	19000000	19500000	11	2.41367
1_1	27000000	27500000	1	1_1	92500000	93000000	11	2.41367
1_1	27500000	28000000	0	1_1	260500000	261000000	11	2.41367
1_1	28000000	28500000	0	1_2	139000000	139500000	11	2.41367
1_1	28500000	29000000	1	2	6000000	6500000	11	2.41367
1_1	29000000	29500000	1	2	11500000	12000000	11	2.41367
1_1	29500000	30000000	4	3	47000000	47500000	11	2.41367
1_1	30000000	30500000	3	3	65000000	65500000	11	2.41367
1_1	30500000	31000000	3	3	72500000	73000000	11	2.41367
1_1	31000000	31500000	5	3	139500000	140000000	11	2.41367
1_1	31500000	32000000	7	4	79000000	79500000	11	2.41367
1_1	32000000	32500000	6	4	206000000	206500000	11	2.41367
1_1	32500000	33000000	1	4	229000000	229500000	11	2.41367
1_1	33000000	33500000	2	5	15500000	16000000	11	2.41367
1_1	33500000	34000000	3	5	17000000	17500000	11	2.41367
1_1	34000000	34500000	2	5	28000000	28500000	11	2.41367
1_1	34500000	35000000	3	9	17500000	18000000	11	2.41367
1_1	35000000	35500000	2	10	22500000	23000000	10	2.10653
1_1	35500000	36000000	3	10	23000000	23500000	10	2.10653
1_1	36000000	36500000	5	1_1	120000000	120500000	10	2.10653
1_1	36500000	37000000	1	1_1	218500000	219000000	10	2.10653
1_1	37000000	37500000	4	1_2	61500000	62000000	10	2.10653
1_1	37500000	38000000	3	2	195000000	195500000	10	2.10653
1_1	38000000	38500000	2	2	459500000	460000000	10	2.10653
1_1	38500000	39000000	2	3	31000000	31500000	10	2.10653
1_1	39000000	39500000	3	3	40500000	41000000	10	2.10653
1_1	39500000	40000000	1	3	43000000	43500000	10	2.10653
1_1	40000000	40500000	1	3	44000000	44500000	10	2.10653
1_1	40500000	41000000	0	3	49500000	50000000	10	2.10653
1_1	41000000	41500000	14	3	146500000	147000000	10	2.10653
1_1	41500000	42000000	0	3	191000000	191500000	10	2.10653
1_1	42000000	42500000	2	3	205500000	206000000	10	2.10653
1_1	42500000	43000000	2	4	10500000	11000000	10	2.10653
1_1	43000000	43500000	2	4	51000000	51500000	10	2.10653
1_1	43500000	44000000	1	4	60000000	60500000	10	2.10653
1_1	44000000	44500000	1	4	131000000	131500000	10	2.10653
1_1	44500000	45000000	2	4	146000000	146500000	10	2.10653
1_1	45000000	45500000	1	4	159500000	160000000	10	2.10653
1_1	45500000	46000000	1	4	168500000	169000000	10	2.10653
1_1	46000000	46500000	2	5	105500000	106000000	10	2.10653
1_1	46500000	47000000	3	6	121000000	121500000	10	2.10653
1_1	47000000	47500000	2	7	45000000	45500000	10	2.10653
1_1	47500000	48000000	2	7	113500000	114000000	10	2.10653
1_1	48000000	48500000	4	8	60500000	61000000	10	2.10653
1_1	48500000	49000000	3	10	18000000	18500000	9	1.79939
1_1	49000000	49500000	5	1_1	4500000	5000000	9	1.79939
1_1	49500000	50000000	2	1_1	212500000	213000000	9	1.79939
1_1	50000000	50500000	5	1_2	22000000	22500000	9	1.79939
1_1	50500000	51000000	2	1_2	31500000	32000000	9	1.79939
1_1	51000000	51500000	3	1_2	177000000	177500000	9	1.79939
1_1	51500000	52000000	1	1_2	272500000	273000000	9	1.79939
1_1	52000000	52500000	4	2	24500000	25000000	9	1.79939
1_1	52500000	53000000	2	2	179000000	179500000	9	1.79939
1_1	53000000	53500000	2	2	256000000	256500000	9	1.79939
1_1	53500000	54000000	5	2	328000000	328500000	9	1.79939
1_1	54000000	54500000	4	2	440500000	441000000	9	1.79939
1_1	54500000	55000000	4	2	448000000	448500000	9	1.79939
1_1	55000000	55500000	2	2	458000000	458500000	9	1.79939
1_1	55500000	56000000	1	3	7000000	7500000	9	1.79939
1_1	56000000	56500000	3	3	23000000	23500000	9	1.79939
1_1	56500000	57000000	2	3	42500000	43000000	9	1.79939
1_1	57000000	57500000	5	3	45500000	46000000	9	1.79939
1_1	57500000	58000000	3	3	112000000	112500000	9	1.79939
1_1	58000000	58500000	1	3	132500000	133000000	9	1.79939
1_1	58500000	59000000	3	3	142000000	142500000	9	1.79939
1_1	59000000	59500000	1	3	144500000	145000000	9	1.79939
1_1	59500000	60000000	3	3	146000000	146500000	9	1.79939
1_1	60000000	60500000	3	3	147000000	147500000	9	1.79939
1_1	60500000	61000000	3	3	150500000	151000000	9	1.79939
1_1	61000000	61500000	3	3	158000000	158500000	9	1.79939
1_1	61500000	62000000	2	3	170500000	171000000	9	1.79939
1_1	62000000	62500000	5	3	249000000	249500000	9	1.79939
1_1	62500000	63000000	2	4	5000000	5500000	9	1.79939
1_1	63000000	63500000	1	4	7000000	7500000	9	1.79939
1_1	63500000	64000000	5	4	11000000	11500000	9	1.79939
1_1	64000000	64500000	1	4	16000000	16500000	9	1.79939
1_1	64500000	65000000	8	4	45500000	46000000	9	1.79939
1_1	65000000	65500000	2	4	55500000	56000000	9	1.79939
1_1	65500000	66000000	1	4	75500000	76000000	9	1.79939
1_1	66000000	66500000	1	4	166500000	167000000	9	1.79939
1_1	66500000	67000000	1	5	16000000	16500000	9	1.79939
1_1	67000000	67500000	4	5	17500000	18000000	9	1.79939
1_1	67500000	68000000	2	5	25000000	25500000	9	1.79939
1_1	68000000	68500000	2	5	77000000	77500000	9	1.79939
1_1	68500000	69000000	2	5	78500000	79000000	9	1.79939
1_1	69000000	69500000	1	5	136000000	136500000	9	1.79939
1_1	69500000	70000000	8	5	168000000	168500000	9	1.79939
1_1	70000000	70500000	0	6	2000000	2500000	9	1.79939
1_1	70500000	71000000	2	6	39500000	40000000	9	1.79939
1_1	71000000	71500000	0	6	95500000	96000000	9	1.79939
1_1	71500000	72000000	1	6	108500000	109000000	9	1.79939
1_1	72000000	72500000	1	7	100500000	101000000	9	1.79939
1_1	72500000	73000000	2	8	2000000	2500000	9	1.79939
1_1	73000000	73500000	1	8	19500000	20000000	9	1.79939
1_1	73500000	74000000	0	8	76000000	76500000	9	1.79939
1_1	74000000	74500000	3	8	90500000	91000000	9	1.79939
1_1	74500000	75000000	3	9	25500000	26000000	9	1.79939
1_1	75000000	75500000	2	10	15000000	15500000	8	1.49225
1_1	75500000	76000000	1	10	26000000	26500000	8	1.49225
1_1	76000000	76500000	0	1_1	1500000	2000000	8	1.49225
1_1	76500000	77000000	0	1_1	64500000	65000000	8	1.49225
1_1	77000000	77500000	1	1_1	69500000	70000000	8	1.49225
1_1	77500000	78000000	3	1_1	125500000	126000000	8	1.49225
1_1	78000000	78500000	2	1_1	173000000	173500000	8	1.49225
1_1	78500000	79000000	7	1_1	182500000	183000000	8	1.49225
1_1	79000000	79500000	2	1_1	189000000	189500000	8	1.49225
1_1	79500000	80000000	1	1_1	195500000	196000000	8	1.49225
1_1	80000000	80500000	0	1_1	245500000	246000000	8	1.49225
1_1	80500000	81000000	1	1_2	38000000	38500000	8	1.49225
1_1	81000000	81500000	2	1_2	56500000	57000000	8	1.49225
1_1	81500000	82000000	1	1_2	79500000	80000000	8	1.49225
1_1	82000000	82500000	1	1_2	81000000	81500000	8	1.49225
1_1	82500000	83000000	0	1_2	97500000	98000000	8	1.49225
1_1	83000000	83500000	2	1_2	194500000	195000000	8	1.49225
1_1	83500000	84000000	1	1_2	210500000	211000000	8	1.49225
1_1	84000000	84500000	2	2	12000000	12500000	8	1.49225
1_1	84500000	85000000	4	2	15500000	16000000	8	1.49225
1_1	85000000	85500000	1	2	33500000	34000000	8	1.49225
1_1	85500000	86000000	3	2	61500000	62000000	8	1.49225
1_1	86000000	86500000	3	2	82000000	82500000	8	1.49225
1_1	86500000	87000000	0	2	93500000	94000000	8	1.49225
1_1	87000000	87500000	2	2	95500000	96000000	8	1.49225
1_1	87500000	88000000	1	2	230000000	230500000	8	1.49225
1_1	88000000	88500000	4	2	230500000	231000000	8	1.49225
1_1	88500000	89000000	1	2	264500000	265000000	8	1.49225
1_1	89000000	89500000	3	2	286500000	287000000	8	1.49225
1_1	89500000	90000000	5	2	288500000	289000000	8	1.49225
1_1	90000000	90500000	3	3	10000000	10500000	8	1.49225
1_1	90500000	91000000	7	3	46500000	47000000	8	1.49225
1_1	91000000	91500000	0	3	59000000	59500000	8	1.49225
1_1	91500000	92000000	1	3	70500000	71000000	8	1.49225
1_1	92000000	92500000	2	3	78000000	78500000	8	1.49225
1_1	92500000	93000000	11	3	99500000	100000000	8	1.49225
1_1	93000000	93500000	13	3	109500000	110000000	8	1.49225
1_1	93500000	94000000	4	3	118000000	118500000	8	1.49225
1_1	94000000	94500000	4	3	126000000	126500000	8	1.49225
1_1	94500000	95000000	2	3	138500000	139000000	8	1.49225
1_1	95000000	95500000	5	3	142500000	143000000	8	1.49225
1_1	95500000	96000000	1	3	167000000	167500000	8	1.49225
1_1	96000000	96500000	3	3	180000000	180500000	8	1.49225
1_1	96500000	97000000	1	3	196000000	196500000	8	1.49225
1_1	97000000	97500000	0	3	236500000	237000000	8	1.49225
1_1	97500000	98000000	0	3	237500000	238000000	8	1.49225
1_1	98000000	98500000	0	3	260000000	260500000	8	1.49225
1_1	98500000	99000000	0	3	265500000	266000000	8	1.49225
1_1	99000000	99500000	1	4	4000000	4500000	8	1.49225
1_1	99500000	100000000	1	4	9500000	10000000	8	1.49225
1_1	100000000	100500000	1	4	10000000	10500000	8	1.49225
1_1	100500000	101000000	1	4	24000000	24500000	8	1.49225
1_1	101000000	101500000	2	4	56000000	56500000	8	1.49225
1_1	101500000	102000000	2	4	77500000	78000000	8	1.49225
1_1	102000000	102500000	1	4	131500000	132000000	8	1.49225
1_1	102500000	103000000	1	4	153500000	154000000	8	1.49225
1_1	103000000	103500000	3	4	156000000	156500000	8	1.49225
1_1	103500000	104000000	1	4	169000000	169500000	8	1.49225
1_1	104000000	104500000	0	4	175500000	176000000	8	1.49225
1_1	104500000	105000000	1	4	205500000	206000000	8	1.49225
1_1	105000000	105500000	1	4	209500000	210000000	8	1.49225
1_1	105500000	106000000	2	4	211500000	212000000	8	1.49225
1_1	106000000	106500000	1	4	213500000	214000000	8	1.49225
1_1	106500000	107000000	1	4	214000000	214500000	8	1.49225
1_1	107000000	107500000	7	5	33500000	34000000	8	1.49225
1_1	107500000	108000000	5	5	82500000	83000000	8	1.49225
1_1	108000000	108500000	2	5	93000000	93500000	8	1.49225
1_1	108500000	109000000	5	5	124000000	124500000	8	1.49225
1_1	109000000	109500000	2	5	144000000	144500000	8	1.49225
1_1	109500000	110000000	5	5	169000000	169500000	8	1.49225
1_1	110000000	110500000	3	5	186000000	186500000	8	1.49225
1_1	110500000	111000000	3	6	14500000	15000000	8	1.49225
1_1	111000000	111500000	1	6	31000000	31500000	8	1.49225
1_1	111500000	112000000	2	6	37500000	38000000	8	1.49225
1_1	112000000	112500000	5	7	1500000	2000000	8	1.49225
1_1	112500000	113000000	3	7	2000000	2500000	8	1.49225
1_1	113000000	113500000	1	7	65000000	65500000	8	1.49225
1_1	113500000	114000000	5	7	80500000	81000000	8	1.49225
1_1	114000000	114500000	0	7	94000000	94500000	8	1.49225
1_1	114500000	115000000	5	7	106000000	106500000	8	1.49225
1_1	115000000	115500000	2	7	112000000	112500000	8	1.49225
1_1	115500000	116000000	7	7	113000000	113500000	8	1.49225
1_1	116000000	116500000	6	8	2500000	3000000	8	1.49225
1_1	116500000	117000000	2	8	74500000	75000000	8	1.49225
1_1	117000000	117500000	1	10	20500000	21000000	7	1.18511
1_1	117500000	118000000	1	1_1	31500000	32000000	7	1.18511
1_1	118000000	118500000	2	1_1	78500000	79000000	7	1.18511
1_1	118500000	119000000	1	1_1	90500000	91000000	7	1.18511
1_1	119000000	119500000	2	1_1	107000000	107500000	7	1.18511
1_1	119500000	120000000	6	1_1	115500000	116000000	7	1.18511
1_1	120000000	120500000	10	1_1	122000000	122500000	7	1.18511
1_1	120500000	121000000	3	1_1	126000000	126500000	7	1.18511
1_1	121000000	121500000	5	1_1	131500000	132000000	7	1.18511
1_1	121500000	122000000	12	1_1	140000000	140500000	7	1.18511
1_1	122000000	122500000	7	1_1	153000000	153500000	7	1.18511
1_1	122500000	123000000	6	1_1	187000000	187500000	7	1.18511
1_1	123000000	123500000	2	1_1	215000000	215500000	7	1.18511
1_1	123500000	124000000	3	1_1	225000000	225500000	7	1.18511
1_1	124000000	124500000	3	1_1	235000000	235500000	7	1.18511
1_1	124500000	125000000	1	1_1	236000000	236500000	7	1.18511
1_1	125000000	125500000	2	1_1	243000000	243500000	7	1.18511
1_1	125500000	126000000	8	1_1	256500000	257000000	7	1.18511
1_1	126000000	126500000	7	1_1	273000000	273500000	7	1.18511
1_1	126500000	127000000	6	1_2	13000000	13500000	7	1.18511
1_1	127000000	127500000	1	1_2	35500000	36000000	7	1.18511
1_1	127500000	128000000	4	1_2	36500000	37000000	7	1.18511
1_1	128000000	128500000	1	1_2	39000000	39500000	7	1.18511
1_1	128500000	129000000	0	1_2	63500000	64000000	7	1.18511
1_1	129000000	129500000	2	1_2	66000000	66500000	7	1.18511
1_1	129500000	130000000	0	1_2	72000000	72500000	7	1.18511
1_1	130000000	130500000	3	1_2	80000000	80500000	7	1.18511
1_1	130500000	131000000	4	1_2	86000000	86500000	7	1.18511
1_1	131000000	131500000	2	1_2	89500000	90000000	7	1.18511
1_1	131500000	132000000	7	1_2	122000000	122500000	7	1.18511
1_1	132000000	132500000	3	1_2	158500000	159000000	7	1.18511
1_1	132500000	133000000	2	1_2	266500000	267000000	7	1.18511
1_1	133000000	133500000	1	1_2	271000000	271500000	7	1.18511
1_1	133500000	134000000	4	2	7000000	7500000	7	1.18511
1_1	134000000	134500000	0	2	20000000	20500000	7	1.18511
1_1	134500000	135000000	2	2	22500000	23000000	7	1.18511
1_1	135000000	135500000	1	2	26000000	26500000	7	1.18511
1_1	135500000	136000000	3	2	31500000	32000000	7	1.18511
1_1	136000000	136500000	4	2	48000000	48500000	7	1.18511
1_1	136500000	137000000	3	2	48500000	49000000	7	1.18511
1_1	137000000	137500000	1	2	56500000	57000000	7	1.18511
1_1	137500000	138000000	1	2	182500000	183000000	7	1.18511
1_1	138000000	138500000	3	2	194000000	194500000	7	1.18511
1_1	138500000	139000000	1	2	197500000	198000000	7	1.18511
1_1	139000000	139500000	1	2	232000000	232500000	7	1.18511
1_1	139500000	140000000	3	2	232500000	233000000	7	1.18511
1_1	140000000	140500000	7	2	236500000	237000000	7	1.18511
1_1	140500000	141000000	3	2	247500000	248000000	7	1.18511
1_1	141000000	141500000	1	2	263500000	264000000	7	1.18511
1_1	141500000	142000000	3	2	281500000	282000000	7	1.18511
1_1	142000000	142500000	1	2	282500000	283000000	7	1.18511
1_1	142500000	143000000	4	2	335500000	336000000	7	1.18511
1_1	143000000	143500000	5	2	384500000	385000000	7	1.18511
1_1	143500000	144000000	1	2	405000000	405500000	7	1.18511
1_1	144000000	144500000	1	2	435000000	435500000	7	1.18511
1_1	144500000	145000000	2	2	443500000	444000000	7	1.18511
1_1	145000000	145500000	2	2	454500000	455000000	7	1.18511
1_1	145500000	146000000	1	3	500000	1000000	7	1.18511
1_1	146000000	146500000	1	3	4500000	5000000	7	1.18511
1_1	146500000	147000000	4	3	13500000	14000000	7	1.18511
1_1	147000000	147500000	3	3	14000000	14500000	7	1.18511
1_1	147500000	148000000	5	3	19500000	20000000	7	1.18511
1_1	148000000	148500000	4	3	22000000	22500000	7	1.18511
1_1	148500000	149000000	2	3	26500000	27000000	7	1.18511
1_1	149000000	149500000	0	3	30500000	31000000	7	1.18511
1_1	149500000	150000000	1	3	37000000	37500000	7	1.18511
1_1	150000000	150500000	5	3	75000000	75500000	7	1.18511
1_1	150500000	151000000	2	3	84500000	85000000	7	1.18511
1_1	151000000	151500000	2	3	87000000	87500000	7	1.18511
1_1	151500000	152000000	4	3	102000000	102500000	7	1.18511
1_1	152000000	152500000	1	3	102500000	103000000	7	1.18511
1_1	152500000	153000000	6	3	111500000	112000000	7	1.18511
1_1	153000000	153500000	7	3	119000000	119500000	7	1.18511
1_1	153500000	154000000	0	3	119500000	120000000	7	1.18511
1_1	154000000	154500000	2	3	126500000	127000000	7	1.18511
1_1	154500000	155000000	6	3	127500000	128000000	7	1.18511
1_1	155000000	155500000	2	3	128000000	128500000	7	1.18511
1_1	155500000	156000000	3	3	133500000	134000000	7	1.18511
1_1	156000000	156500000	6	3	137500000	138000000	7	1.18511
1_1	156500000	157000000	0	3	141000000	141500000	7	1.18511
1_1	157000000	157500000	1	3	149000000	149500000	7	1.18511
1_1	157500000	158000000	2	3	163500000	164000000	7	1.18511
1_1	158000000	158500000	5	3	172500000	173000000	7	1.18511
1_1	158500000	159000000	3	3	173000000	173500000	7	1.18511
1_1	159000000	159500000	5	3	179500000	180000000	7	1.18511
1_1	159500000	160000000	4	3	183500000	184000000	7	1.18511
1_1	160000000	160500000	5	3	184500000	185000000	7	1.18511
1_1	160500000	161000000	3	3	186500000	187000000	7	1.18511
1_1	161000000	161500000	2	3	188500000	189000000	7	1.18511
1_1	161500000	162000000	2	3	222500000	223000000	7	1.18511
1_1	162000000	162500000	3	3	232000000	232500000	7	1.18511
1_1	162500000	163000000	4	3	233000000	233500000	7	1.18511
1_1	163000000	163500000	2	3	235000000	235500000	7	1.18511
1_1	163500000	164000000	2	3	242000000	242500000	7	1.18511
1_1	164000000	164500000	2	3	277500000	278000000	7	1.18511
1_1	164500000	165000000	5	4	7500000	8000000	7	1.18511
1_1	165000000	165500000	3	4	16500000	17000000	7	1.18511
1_1	165500000	166000000	1	4	17000000	17500000	7	1.18511
1_1	166000000	166500000	4	4	18500000	19000000	7	1.18511
1_1	166500000	167000000	2	4	33000000	33500000	7	1.18511
1_1	167000000	167500000	3	4	39500000	40000000	7	1.18511
1_1	167500000	168000000	1	4	45000000	45500000	7	1.18511
1_1	168000000	168500000	4	4	65500000	66000000	7	1.18511
1_1	168500000	169000000	4	4	118500000	119000000	7	1.18511
1_1	169000000	169500000	1	4	140500000	141000000	7	1.18511
1_1	169500000	170000000	6	4	142500000	143000000	7	1.18511
1_1	170000000	170500000	3	4	152500000	153000000	7	1.18511
1_1	170500000	171000000	3	4	165500000	166000000	7	1.18511
1_1	171000000	171500000	2	4	171500000	172000000	7	1.18511
1_1	171500000	172000000	5	4	175000000	175500000	7	1.18511
1_1	172000000	172500000	5	4	182500000	183000000	7	1.18511
1_1	172500000	173000000	3	4	188500000	189000000	7	1.18511
1_1	173000000	173500000	8	4	196500000	197000000	7	1.18511
1_1	173500000	174000000	1	4	204000000	204500000	7	1.18511
1_1	174000000	174500000	2	4	207500000	208000000	7	1.18511
1_1	174500000	175000000	1	4	223500000	224000000	7	1.18511
1_1	175000000	175500000	0	4	226500000	227000000	7	1.18511
1_1	175500000	176000000	0	5	22000000	22500000	7	1.18511
1_1	176000000	176500000	4	5	30500000	31000000	7	1.18511
1_1	176500000	177000000	2	5	65500000	66000000	7	1.18511
1_1	177000000	177500000	1	5	82000000	82500000	7	1.18511
1_1	177500000	178000000	1	5	102000000	102500000	7	1.18511
1_1	178000000	178500000	2	5	107000000	107500000	7	1.18511
1_1	178500000	179000000	6	5	113500000	114000000	7	1.18511
1_1	179000000	179500000	1	5	131500000	132000000	7	1.18511
1_1	179500000	180000000	4	5	158500000	159000000	7	1.18511
1_1	180000000	180500000	2	6	6000000	6500000	7	1.18511
1_1	180500000	181000000	3	6	21500000	22000000	7	1.18511
1_1	181000000	181500000	5	6	23000000	23500000	7	1.18511
1_1	181500000	182000000	1	6	27500000	28000000	7	1.18511
1_1	182000000	182500000	1	6	35000000	35500000	7	1.18511
1_1	182500000	183000000	8	6	53000000	53500000	7	1.18511
1_1	183000000	183500000	3	6	53500000	54000000	7	1.18511
1_1	183500000	184000000	2	6	67500000	68000000	7	1.18511
1_1	184000000	184500000	3	6	85000000	85500000	7	1.18511
1_1	184500000	185000000	3	6	113000000	113500000	7	1.18511
1_1	185000000	185500000	1	6	115500000	116000000	7	1.18511
1_1	185500000	186000000	5	7	90500000	91000000	7	1.18511
1_1	186000000	186500000	2	7	101500000	102000000	7	1.18511
1_1	186500000	187000000	1	7	105500000	106000000	7	1.18511
1_1	187000000	187500000	7	7	114500000	115000000	7	1.18511
1_1	187500000	188000000	4	8	5500000	6000000	7	1.18511
1_1	188000000	188500000	4	8	42500000	43000000	7	1.18511
1_1	188500000	189000000	5	8	45500000	46000000	7	1.18511
1_1	189000000	189500000	8	8	47000000	47500000	7	1.18511
1_1	189500000	190000000	6	8	51000000	51500000	7	1.18511
1_1	190000000	190500000	3	8	56000000	56500000	7	1.18511
1_1	190500000	191000000	2	8	60000000	60500000	7	1.18511
1_1	191000000	191500000	6	8	75000000	75500000	7	1.18511
1_1	191500000	192000000	5	8	89500000	90000000	7	1.18511
1_1	192000000	192500000	4	9	0	500000	7	1.18511
1_1	192500000	193000000	6	9	19000000	19500000	7	1.18511
1_1	193000000	193500000	2	9	27500000	28000000	7	1.18511
1_1	193500000	194000000	12	X	44000000	44500000	7	1.18511
1_1	194000000	194500000	6	X	49000000	49500000	7	1.18511
1_1	194500000	195000000	1	10	12000000	12500000	6	0.877973
1_1	195000000	195500000	2	10	19500000	20000000	6	0.877973
1_1	195500000	196000000	8	10	20000000	20500000	6	0.877973
1_1	196000000	196500000	1	1_1	12500000	13000000	6	0.877973
1_1	196500000	197000000	1	1_1	16000000	16500000	6	0.877973
1_1	197000000	197500000	6	1_1	19500000	20000000	6	0.877973
1_1	197500000	198000000	15	1_1	23000000	23500000	6	0.877973
1_1	198000000	198500000	0	1_1	25500000	26000000	6	0.877973
1_1	198500000	199000000	3	1_1	32000000	32500000	6	0.877973
1_1	199000000	199500000	4	1_1	116000000	116500000	6	0.877973
1_1	199500000	200000000	2	1_1	119500000	120000000	6	0.877973
1_1	200000000	200500000	6	1_1	122500000	123000000	6	0.877973
1_1	200500000	201000000	5	1_1	126500000	127000000	6	0.877973
1_1	201000000	201500000	1	1_1	152500000	153000000	6	0.877973
1_1	201500000	202000000	1	1_1	154500000	155000000	6	0.877973
1_1	202000000	202500000	4	1_1	156000000	156500000	6	0.877973
1_1	202500000	203000000	3	1_1	169500000	170000000	6	0.877973
1_1	203000000	203500000	3	1_1	178500000	179000000	6	0.877973
1_1	203500000	204000000	4	1_1	189500000	190000000	6	0.877973
1_1	204000000	204500000	4	1_1	191000000	191500000	6	0.877973
1_1	204500000	205000000	1	1_1	192500000	193000000	6	0.877973
1_1	205000000	205500000	2	1_1	194000000	194500000	6	0.877973
1_1	205500000	206000000	6	1_1	197000000	197500000	6	0.877973
1_1	206000000	206500000	1	1_1	200000000	200500000	6	0.877973
1_1	206500000	207000000	3	1_1	205500000	206000000	6	0.877973
1_1	207000000	207500000	1	1_1	211000000	211500000	6	0.877973
1_1	207500000	208000000	2	1_1	217500000	218000000	6	0.877973
1_1	208000000	208500000	3	1_1	219000000	219500000	6	0.877973
1_1	208500000	209000000	1	1_1	220500000	221000000	6	0.877973
1_1	209000000	209500000	5	1_1	226000000	226500000	6	0.877973
1_1	209500000	210000000	1	1_1	229000000	229500000	6	0.877973
1_1	210000000	210500000	5	1_1	244000000	244500000	6	0.877973
1_1	210500000	211000000	3	1_2	3000000	3500000	6	0.877973
1_1	211000000	211500000	6	1_2	28500000	29000000	6	0.877973
1_1	211500000	212000000	1	1_2	30000000	30500000	6	0.877973
1_1	212000000	212500000	2	1_2	49000000	49500000	6	0.877973
1_1	212500000	213000000	9	1_2	49500000	50000000	6	0.877973
1_1	213000000	213500000	4	1_2	64000000	64500000	6	0.877973
1_1	213500000	214000000	1	1_2	66500000	67000000	6	0.877973
1_1	214000000	214500000	5	1_2	76000000	76500000	6	0.877973
1_1	214500000	215000000	0	1_2	77000000	77500000	6	0.877973
1_1	215000000	215500000	7	1_2	81500000	82000000	6	0.877973
1_1	215500000	216000000	2	1_2	83500000	84000000	6	0.877973
1_1	216000000	216500000	5	1_2	85500000	86000000	6	0.877973
1_1	216500000	217000000	4	1_2	101500000	102000000	6	0.877973
1_1	217000000	217500000	2	1_2	108000000	108500000	6	0.877973
1_1	217500000	218000000	6	1_2	109000000	109500000	6	0.877973
1_1	218000000	218500000	2	1_2	116500000	117000000	6	0.877973
1_1	218500000	219000000	10	1_2	119500000	120000000	6	0.877973
1_1	219000000	219500000	6	1_2	141500000	142000000	6	0.877973
1_1	219500000	220000000	1	1_2	172500000	173000000	6	0.877973
1_1	220000000	220500000	4	1_2	198000000	198500000	6	0.877973
1_1	220500000	221000000	6	1_2	211500000	212000000	6	0.877973
1_1	221000000	221500000	1	1_2	215000000	215500000	6	0.877973
1_1	221500000	222000000	1	1_2	218000000	218500000	6	0.877973
1_1	222000000	222500000	3	1_2	229000000	229500000	6	0.877973
1_1	222500000	223000000	3	1_2	265000000	265500000	6	0.877973
1_1	223000000	223500000	4	2	4500000	5000000	6	0.877973
1_1	223500000	224000000	4	2	16500000	17000000	6	0.877973
1_1	224000000	224500000	3	2	19000000	19500000	6	0.877973
1_1	224500000	225000000	4	2	19500000	20000000	6	0.877973
1_1	225000000	225500000	7	2	23000000	23500000	6	0.877973
1_1	225500000	226000000	4	2	26500000	27000000	6	0.877973
1_1	226000000	226500000	6	2	27500000	28000000	6	0.877973
1_1	226500000	227000000	4	2	39000000	39500000	6	0.877973
1_1	227000000	227500000	2	2	50000000	50500000	6	0.877973
1_1	227500000	228000000	0	2	58500000	59000000	6	0.877973
1_1	228000000	228500000	3	2	66000000	66500000	6	0.877973
1_1	228500000	229000000	1	2	89500000	90000000	6	0.877973
1_1	229000000	229500000	6	2	94500000	95000000	6	0.877973
1_1	229500000	230000000	3	2	164500000	165000000	6	0.877973
1_1	230000000	230500000	4	2	174000000	174500000	6	0.877973
1_1	230500000	231000000	3	2	176500000	177000000	6	0.877973
1_1	231000000	231500000	5	2	184500000	185000000	6	0.877973
1_1	231500000	232000000	3	2	196000000	196500000	6	0.877973
1_1	232000000	232500000	0	2	198500000	199000000	6	0.877973
1_1	232500000	233000000	5	2	199000000	199500000	6	0.877973
1_1	233000000	233500000	2	2	215500000	216000000	6	0.877973
1_1	233500000	234000000	3	2	233500000	234000000	6	0.877973
1_1	234000000	234500000	3	2	259000000	259500000	6	0.877973
1_1	234500000	235000000	5	2	269000000	269500000	6	0.877973
1_1	235000000	235500000	7	2	326000000	326500000	6	0.877973
1_1	235500000	236000000	1	2	326500000	327000000	6	0.877973
1_1	236000000	236500000	7	2	329000000	329500000	6	0.877973
1_1	236500000	237000000	2	2	350000000	350500000	6	0.877973
1_1	237000000	237500000	1	2	362500000	363000000	6	0.877973
1_1	237500000	238000000	2	2	367000000	367500000	6	0.877973
1_1	238000000	238500000	1	2	370500000	371000000	6	0.877973
1_1	238500000	239000000	5	2	374000000	374500000	6	0.877973
1_1	239000000	239500000	0	2	392000000	392500000	6	0.877973
1_1	239500000	240000000	0	2	399500000	400000000	6	0.877973
1_1	240000000	240500000	1	2	402000000	402500000	6	0.877973
1_1	240500000	241000000	1	2	410000000	410500000	6	0.877973
1_1	241000000	241500000	5	2	428500000	429000000	6	0.877973
1_1	241500000	242000000	3	2	434500000	435000000	6	0.877973
1_1	242000000	242500000	1	2	448500000	449000000	6	0.877973
1_1	242500000	243000000	3	2	459000000	459500000	6	0.877973
1_1	243000000	243500000	7	3	8500000	9000000	6	0.877973
1_1	243500000	244000000	1	3	11000000	11500000	6	0.877973
1_1	244000000	244500000	6	3	17500000	18000000	6	0.877973
1_1	244500000	245000000	5	3	20500000	21000000	6	0.877973
1_1	245000000	245500000	2	3	25000000	25500000	6	0.877973
1_1	245500000	246000000	8	3	27500000	28000000	6	0.877973
1_1	246000000	246500000	3	3	28000000	28500000	6	0.877973
1_1	246500000	247000000	2	3	28500000	29000000	6	0.877973
1_1	247000000	247500000	0	3	33000000	33500000	6	0.877973
1_1	247500000	248000000	0	3	36500000	37000000	6	0.877973
1_1	248000000	248500000	0	3	38500000	39000000	6	0.877973
1_1	248500000	249000000	1	3	41500000	42000000	6	0.877973
1_1	249000000	249500000	1	3	50000000	50500000	6	0.877973
1_1	249500000	250000000	1	3	56500000	57000000	6	0.877973
1_1	250000000	250500000	4	3	60000000	60500000	6	0.877973
1_1	250500000	251000000	2	3	60500000	61000000	6	0.877973
1_1	251000000	251500000	2	3	66000000	66500000	6	0.877973
1_1	251500000	252000000	2	3	77000000	77500000	6	0.877973
1_1	252000000	252500000	1	3	80500000	81000000	6	0.877973
1_1	252500000	253000000	5	3	88000000	88500000	6	0.877973
1_1	253000000	253500000	5	3	94500000	95000000	6	0.877973
1_1	253500000	254000000	1	3	101000000	101500000	6	0.877973
1_1	254000000	254500000	0	3	104000000	104500000	6	0.877973
1_1	254500000	255000000	1	3	123000000	123500000	6	0.877973
1_1	255000000	255500000	3	3	123500000	124000000	6	0.877973
1_1	255500000	256000000	2	3	132000000	132500000	6	0.877973
1_1	256000000	256500000	1	3	133000000	133500000	6	0.877973
1_1	256500000	257000000	7	3	155000000	155500000	6	0.877973
1_1	257000000	257500000	3	3	157000000	157500000	6	0.877973
1_1	257500000	258000000	2	3	162000000	162500000	6	0.877973
1_1	258000000	258500000	3	3	163000000	163500000	6	0.877973
1_1	258500000	259000000	1	3	166000000	166500000	6	0.877973
1_1	259000000	259500000	2	3	174500000	175000000	6	0.877973
1_1	259500000	260000000	3	3	178500000	179000000	6	0.877973
1_1	260000000	260500000	3	3	181500000	182000000	6	0.877973
1_1	260500000	261000000	11	3	190500000	191000000	6	0.877973
1_1	261000000	261500000	3	3	197500000	198000000	6	0.877973
1_1	261500000	262000000	1	3	203000000	203500000	6	0.877973
1_1	262000000	262500000	3	3	210500000	211000000	6	0.877973
1_1	262500000	263000000	0	3	215500000	216000000	6	0.877973
1_1	263000000	263500000	0	3	216500000	217000000	6	0.877973
1_1	263500000	264000000	0	3	224000000	224500000	6	0.877973
1_1	264000000	264500000	3	3	236000000	236500000	6	0.877973
1_1	264500000	265000000	3	3	238000000	238500000	6	0.877973
1_1	265000000	265500000	2	3	244500000	245000000	6	0.877973
1_1	265500000	266000000	3	3	251500000	252000000	6	0.877973
1_1	266000000	266500000	2	3	255500000	256000000	6	0.877973
1_1	266500000	267000000	5	3	264500000	265000000	6	0.877973
1_1	267000000	267500000	1	4	1000000	1500000	6	0.877973
1_1	267500000	268000000	2	4	1500000	2000000	6	0.877973
1_1	268000000	268500000	2	4	2000000	2500000	6	0.877973
1_1	268500000	269000000	1	4	2500000	3000000	6	0.877973
1_1	269000000	269500000	3	4	6000000	6500000	6	0.877973
1_1	269500000	270000000	0	4	13000000	13500000	6	0.877973
1_1	270000000	270500000	1	4	19500000	20000000	6	0.877973
1_1	270500000	271000000	4	4	20000000	20500000	6	0.877973
1_1	271000000	271500000	1	4	22000000	22500000	6	0.877973
1_1	271500000	272000000	0	4	57500000	58000000	6	0.877973
1_1	272000000	272500000	0	4	62000000	62500000	6	0.877973
1_1	272500000	273000000	5	4	67500000	68000000	6	0.877973
1_1	273000000	273500000	7	4	86500000	87000000	6	0.877973
1_1	273500000	274000000	3	4	87000000	87500000	6	0.877973
1_1	274000000	274500000	1	4	95500000	96000000	6	0.877973
1_1	274500000	275000000	3	4	97000000	97500000	6	0.877973
1_1	275000000	275500000	3	4	101500000	102000000	6	0.877973
1_1	275500000	275698159	1	4	105500000	106000000	6	0.877973
1_2	0	500000	5	4	108500000	109000000	6	0.877973
1_2	500000	1000000	3	4	109000000	109500000	6	0.877973
1_2	1000000	1500000	4	4	126500000	127000000	6	0.877973
1_2	1500000	2000000	3	4	130000000	130500000	6	0.877973
1_2	2000000	2500000	2	4	138500000	139000000	6	0.877973
1_2	2500000	3000000	1	4	148500000	149000000	6	0.877973
1_2	3000000	3500000	6	4	153000000	153500000	6	0.877973
1_2	3500000	4000000	2	4	154000000	154500000	6	0.877973
1_2	4000000	4500000	1	4	158500000	159000000	6	0.877973
1_2	4500000	5000000	3	4	161000000	161500000	6	0.877973
1_2	5000000	5500000	2	4	167000000	167500000	6	0.877973
1_2	5500000	6000000	4	4	168000000	168500000	6	0.877973
1_2	6000000	6500000	2	4	181000000	181500000	6	0.877973
1_2	6500000	7000000	3	4	182000000	182500000	6	0.877973
1_2	7000000	7500000	5	4	183500000	184000000	6	0.877973
1_2	7500000	8000000	4	4	187500000	188000000	6	0.877973
1_2	8000000	8500000	2	4	189500000	190000000	6	0.877973
1_2	8500000	9000000	4	4	205000000	205500000	6	0.877973
1_2	9000000	9500000	3	4	211000000	211500000	6	0.877973
1_2	9500000	10000000	3	4	221500000	222000000	6	0.877973
1_2	10000000	10500000	3	4	224500000	225000000	6	0.877973
1_2	10500000	11000000	2	5	3000000	3500000	6	0.877973
1_2	11000000	11500000	3	5	7000000	7500000	6	0.877973
1_2	11500000	12000000	0	5	14000000	14500000	6	0.877973
1_2	12000000	12500000	1	5	15000000	15500000	6	0.877973
1_2	12500000	13000000	2	5	20000000	20500000	6	0.877973
1_2	13000000	13500000	7	5	23500000	24000000	6	0.877973
1_2	13500000	14000000	5	5	27000000	27500000	6	0.877973
1_2	14000000	14500000	3	5	27500000	28000000	6	0.877973
1_2	14500000	15000000	3	5	37500000	38000000	6	0.877973
1_2	15000000	15500000	1	5	51000000	51500000	6	0.877973
1_2	15500000	16000000	2	5	56000000	56500000	6	0.877973
1_2	16000000	16500000	1	5	65000000	65500000	6	0.877973
1_2	16500000	17000000	4	5	72000000	72500000	6	0.877973
1_2	17000000	17500000	2	5	73000000	73500000	6	0.877973
1_2	17500000	18000000	0	5	77500000	78000000	6	0.877973
1_2	18000000	18500000	0	5	79500000	80000000	6	0.877973
1_2	18500000	19000000	0	5	90000000	90500000	6	0.877973
1_2	19000000	19500000	1	5	91500000	92000000	6	0.877973
1_2	19500000	20000000	2	5	95500000	96000000	6	0.877973
1_2	20000000	20500000	3	5	96000000	96500000	6	0.877973
1_2	20500000	21000000	4	5	111500000	112000000	6	0.877973
1_2	21000000	21500000	0	5	124500000	125000000	6	0.877973
1_2	21500000	22000000	0	5	129500000	130000000	6	0.877973
1_2	22000000	22500000	9	5	146000000	146500000	6	0.877973
1_2	22500000	23000000	2	5	147000000	147500000	6	0.877973
1_2	23000000	23500000	1	5	153500000	154000000	6	0.877973
1_2	23500000	24000000	2	5	157500000	158000000	6	0.877973
1_2	24000000	24500000	1	5	183500000	184000000	6	0.877973
1_2	24500000	25000000	3	5	185500000	186000000	6	0.877973
1_2	25000000	25500000	5	5	187000000	187500000	6	0.877973
1_2	25500000	26000000	2	5	191500000	192000000	6	0.877973
1_2	26000000	26500000	2	6	0	500000	6	0.877973
1_2	26500000	27000000	3	6	3500000	4000000	6	0.877973
1_2	27000000	27500000	2	6	7500000	8000000	6	0.877973
1_2	27500000	28000000	1	6	9000000	9500000	6	0.877973
1_2	28000000	28500000	1	6	11000000	11500000	6	0.877973
1_2	28500000	29000000	6	6	13500000	14000000	6	0.877973
1_2	29000000	29500000	4	6	20500000	21000000	6	0.877973
1_2	29500000	30000000	3	6	23500000	24000000	6	0.877973
1_2	30000000	30500000	6	6	24000000	24500000	6	0.877973
1_2	30500000	31000000	2	6	29000000	29500000	6	0.877973
1_2	31000000	31500000	4	6	40000000	40500000	6	0.877973
1_2	31500000	32000000	9	6	56500000	57000000	6	0.877973
1_2	32000000	32500000	17	6	66000000	66500000	6	0.877973
1_2	32500000	33000000	3	6	69500000	70000000	6	0.877973
1_2	33000000	33500000	4	6	73500000	74000000	6	0.877973
1_2	33500000	34000000	2	6	77500000	78000000	6	0.877973
1_2	34000000	34500000	1	6	78000000	78500000	6	0.877973
1_2	34500000	35000000	2	6	85500000	86000000	6	0.877973
1_2	35000000	35500000	4	6	90500000	91000000	6	0.877973
1_2	35500000	36000000	7	6	94000000	94500000	6	0.877973
1_2	36000000	36500000	1	6	94500000	95000000	6	0.877973
1_2	36500000	37000000	7	6	104000000	104500000	6	0.877973
1_2	37000000	37500000	4	6	113500000	114000000	6	0.877973
1_2	37500000	38000000	4	6	124000000	124500000	6	0.877973
1_2	38000000	38500000	8	6	125500000	126000000	6	0.877973
1_2	38500000	39000000	3	6	127000000	127500000	6	0.877973
1_2	39000000	39500000	7	6	135500000	136000000	6	0.877973
1_2	39500000	40000000	2	6	136000000	136500000	6	0.877973
1_2	40000000	40500000	0	6	153500000	154000000	6	0.877973
1_2	40500000	41000000	5	7	5000000	5500000	6	0.877973
1_2	41000000	41500000	3	7	7000000	7500000	6	0.877973
1_2	41500000	42000000	4	7	13500000	14000000	6	0.877973
1_2	42000000	42500000	1	7	19500000	20000000	6	0.877973
1_2	42500000	43000000	3	7	26500000	27000000	6	0.877973
1_2	43000000	43500000	4	7	32000000	32500000	6	0.877973
1_2	43500000	44000000	2	7	64000000	64500000	6	0.877973
1_2	44000000	44500000	5	7	79000000	79500000	6	0.877973
1_2	44500000	45000000	2	7	95000000	95500000	6	0.877973
1_2	45000000	45500000	4	7	105000000	105500000	6	0.877973
1_2	45500000	46000000	4	7	108500000	109000000	6	0.877973
1_2	46000000	46500000	1	7	121500000	122000000	6	0.877973
1_2	46500000	47000000	5	7	122000000	122500000	6	0.877973
1_2	47000000	47500000	4	8	3000000	3500000	6	0.877973
1_2	47500000	48000000	1	8	3500000	4000000	6	0.877973
1_2	48000000	48500000	4	8	45000000	45500000	6	0.877973
1_2	48500000	49000000	5	8	50500000	51000000	6	0.877973
1_2	49000000	49500000	6	8	58000000	58500000	6	0.877973
1_2	49500000	50000000	6	8	66000000	66500000	6	0.877973
1_2	50000000	50500000	1	8	68000000	68500000	6	0.877973
1_2	50500000	51000000	2	8	84500000	85000000	6	0.877973
1_2	51000000	51500000	5	8	95500000	96000000	6	0.877973
1_2	51500000	52000000	2	8	96000000	96500000	6	0.877973
1_2	52000000	52500000	0	9	2000000	2500000	6	0.877973
1_2	52500000	53000000	3	9	5500000	6000000	6	0.877973
1_2	53000000	53500000	2	9	6000000	6500000	6	0.877973
1_2	53500000	54000000	3	9	17000000	17500000	6	0.877973
1_2	54000000	54500000	2	X	42000000	42500000	6	0.877973
1_2	54500000	55000000	1	10	6000000	6500000	5	0.570832
1_2	55000000	55500000	2	10	12500000	13000000	5	0.570832
1_2	55500000	56000000	1	1_1	6500000	7000000	5	0.570832
1_2	56000000	56500000	3	1_1	17000000	17500000	5	0.570832
1_2	56500000	57000000	8	1_1	19000000	19500000	5	0.570832
1_2	57000000	57500000	3	1_1	23500000	24000000	5	0.570832
1_2	57500000	58000000	4	1_1	31000000	31500000	5	0.570832
1_2	58000000	58500000	1	1_1	36000000	36500000	5	0.570832
1_2	58500000	59000000	3	1_1	49000000	49500000	5	0.570832
1_2	59000000	59500000	2	1_1	50000000	50500000	5	0.570832
1_2	59500000	60000000	3	1_1	53500000	54000000	5	0.570832
1_2	60000000	60500000	4	1_1	57000000	57500000	5	0.570832
1_2	60500000	61000000	4	1_1	62000000	62500000	5	0.570832
1_2	61000000	61500000	3	1_1	63500000	64000000	5	0.570832
1_2	61500000	62000000	10	1_1	89500000	90000000	5	0.570832
1_2	62000000	62500000	1	1_1	95000000	95500000	5	0.570832
1_2	62500000	63000000	3	1_1	107500000	108000000	5	0.570832
1_2	63000000	63500000	0	1_1	108500000	109000000	5	0.570832
1_2	63500000	64000000	7	1_1	109500000	110000000	5	0.570832
1_2	64000000	64500000	6	1_1	112000000	112500000	5	0.570832
1_2	64500000	65000000	3	1_1	113500000	114000000	5	0.570832
1_2	65000000	65500000	4	1_1	114500000	115000000	5	0.570832
1_2	65500000	66000000	4	1_1	121000000	121500000	5	0.570832
1_2	66000000	66500000	7	1_1	143000000	143500000	5	0.570832
1_2	66500000	67000000	6	1_1	147500000	148000000	5	0.570832
1_2	67000000	67500000	1	1_1	150000000	150500000	5	0.570832
1_2	67500000	68000000	2	1_1	158000000	158500000	5	0.570832
1_2	68000000	68500000	3	1_1	159000000	159500000	5	0.570832
1_2	68500000	69000000	4	1_1	160000000	160500000	5	0.570832
1_2	69000000	69500000	4	1_1	164500000	165000000	5	0.570832
1_2	69500000	70000000	1	1_1	171500000	172000000	5	0.570832
1_2	70000000	70500000	1	1_1	172000000	172500000	5	0.570832
1_2	70500000	71000000	2	1_1	181000000	181500000	5	0.570832
1_2	71000000	71500000	3	1_1	185500000	186000000	5	0.570832
1_2	71500000	72000000	4	1_1	188500000	189000000	5	0.570832
1_2	72000000	72500000	7	1_1	191500000	192000000	5	0.570832
1_2	72500000	73000000	4	1_1	200500000	201000000	5	0.570832
1_2	73000000	73500000	3	1_1	209000000	209500000	5	0.570832
1_2	73500000	74000000	1	1_1	210000000	210500000	5	0.570832
1_2	74000000	74500000	5	1_1	214000000	214500000	5	0.570832
1_2	74500000	75000000	2	1_1	216000000	216500000	5	0.570832
1_2	75000000	75500000	2	1_1	231000000	231500000	5	0.570832
1_2	75500000	76000000	4	1_1	232500000	233000000	5	0.570832
1_2	76000000	76500000	6	1_1	234500000	235000000	5	0.570832
1_2	76500000	77000000	4	1_1	238500000	239000000	5	0.570832
1_2	77000000	77500000	6	1_1	241000000	241500000	5	0.570832
1_2	77500000	78000000	4	1_1	244500000	245000000	5	0.570832
1_2	78000000	78500000	4	1_1	252500000	253000000	5	0.570832
1_2	78500000	79000000	3	1_1	253000000	253500000	5	0.570832
1_2	79000000	79500000	3	1_1	266500000	267000000	5	0.570832
1_2	79500000	80000000	8	1_1	272500000	273000000	5	0.570832
1_2	80000000	80500000	7	1_2	0	500000	5	0.570832
1_2	80500000	81000000	2	1_2	7000000	7500000	5	0.570832
1_2	81000000	81500000	8	1_2	13500000	14000000	5	0.570832
1_2	81500000	82000000	6	1_2	25000000	25500000	5	0.570832
1_2	82000000	82500000	1	1_2	40500000	41000000	5	0.570832
1_2	82500000	83000000	3	1_2	44000000	44500000	5	0.570832
1_2	83000000	83500000	4	1_2	46500000	47000000	5	0.570832
1_2	83500000	84000000	6	1_2	48500000	49000000	5	0.570832
1_2	84000000	84500000	1	1_2	51000000	51500000	5	0.570832
1_2	84500000	85000000	1	1_2	74000000	74500000	5	0.570832
1_2	85000000	85500000	1	1_2	112000000	112500000	5	0.570832
1_2	85500000	86000000	6	1_2	112500000	113000000	5	0.570832
1_2	86000000	86500000	7	1_2	120000000	120500000	5	0.570832
1_2	86500000	87000000	1	1_2	121500000	122000000	5	0.570832
1_2	87000000	87500000	3	1_2	134000000	134500000	5	0.570832
1_2	87500000	88000000	3	1_2	158000000	158500000	5	0.570832
1_2	88000000	88500000	2	1_2	162500000	163000000	5	0.570832
1_2	88500000	89000000	0	1_2	166500000	167000000	5	0.570832
1_2	89000000	89500000	4	1_2	168500000	169000000	5	0.570832
1_2	89500000	90000000	7	1_2	187500000	188000000	5	0.570832
1_2	90000000	90500000	2	1_2	189500000	190000000	5	0.570832
1_2	90500000	91000000	2	1_2	196500000	197000000	5	0.570832
1_2	91000000	91500000	2	1_2	219000000	219500000	5	0.570832
1_2	91500000	92000000	4	1_2	227000000	227500000	5	0.570832
1_2	92000000	92500000	1	1_2	231000000	231500000	5	0.570832
1_2	92500000	93000000	0	1_2	262000000	262500000	5	0.570832
1_2	93000000	93500000	3	1_2	273500000	274000000	5	0.570832
1_2	93500000	94000000	4	2	2000000	2500000	5	0.570832
1_2	94000000	94500000	1	2	9000000	9500000	5	0.570832
1_2	94500000	95000000	3	2	10500000	11000000	5	0.570832
1_2	95000000	95500000	3	2	13500000	14000000	5	0.570832
1_2	95500000	96000000	4	2	21000000	21500000	5	0.570832
1_2	96000000	96500000	4	2	28500000	29000000	5	0.570832
1_2	96500000	97000000	4	2	29000000	29500000	5	0.570832
1_2	97000000	97500000	1	2	30000000	30500000	5	0.570832
1_2	97500000	98000000	8	2	36000000	36500000	5	0.570832
1_2	98000000	98500000	2	2	36500000	37000000	5	0.570832
1_2	98500000	99000000	3	2	51500000	52000000	5	0.570832
1_2	99000000	99500000	2	2	67500000	68000000	5	0.570832
1_2	99500000	100000000	2	2	69000000	69500000	5	0.570832
1_2	100000000	100500000	3	2	69500000	70000000	5	0.570832
1_2	100500000	101000000	3	2	70000000	70500000	5	0.570832
1_2	101000000	101500000	1	2	73500000	74000000	5	0.570832
1_2	101500000	102000000	6	2	75000000	75500000	5	0.570832
1_2	102000000	102500000	1	2	76500000	77000000	5	0.570832
1_2	102500000	103000000	2	2	85500000	86000000	5	0.570832
1_2	103000000	103500000	2	2	86500000	87000000	5	0.570832
1_2	103500000	104000000	3	2	90500000	91000000	5	0.570832
1_2	104000000	104500000	3	2	145500000	146000000	5	0.570832
1_2	104500000	105000000	4	2	154000000	154500000	5	0.570832
1_2	105000000	105500000	1	2	173500000	174000000	5	0.570832
1_2	105500000	106000000	4	2	176000000	176500000	5	0.570832
1_2	106000000	106500000	2	2	183000000	183500000	5	0.570832
1_2	106500000	107000000	2	2	192000000	192500000	5	0.570832
1_2	107000000	107500000	2	2	229000000	229500000	5	0.570832
1_2	107500000	108000000	4	2	245500000	246000000	5	0.570832
1_2	108000000	108500000	6	2	246500000	247000000	5	0.570832
1_2	108500000	109000000	4	2	249500000	250000000	5	0.570832
1_2	109000000	109500000	6	2	255500000	256000000	5	0.570832
1_2	109500000	110000000	3	2	262000000	262500000	5	0.570832
1_2	110000000	110500000	3	2	264000000	264500000	5	0.570832
1_2	110500000	111000000	4	2	269500000	270000000	5	0.570832
1_2	111000000	111500000	4	2	278500000	279000000	5	0.570832
1_2	111500000	112000000	2	2	307000000	307500000	5	0.570832
1_2	112000000	112500000	5	2	309000000	309500000	5	0.570832
1_2	112500000	113000000	5	2	310000000	310500000	5	0.570832
1_2	113000000	113500000	0	2	318000000	318500000	5	0.570832
1_2	113500000	114000000	1	2	321500000	322000000	5	0.570832
1_2	114000000	114500000	2	2	322500000	323000000	5	0.570832
1_2	114500000	115000000	0	2	323500000	324000000	5	0.570832
1_2	115000000	115500000	4	2	325500000	326000000	5	0.570832
1_2	115500000	116000000	4	2	327500000	328000000	5	0.570832
1_2	116000000	116500000	0	2	330000000	330500000	5	0.570832
1_2	116500000	117000000	6	2	332000000	332500000	5	0.570832
1_2	117000000	117500000	4	2	340500000	341000000	5	0.570832
1_2	117500000	118000000	4	2	343500000	344000000	5	0.570832
1_2	118000000	118500000	3	2	354500000	355000000	5	0.570832
1_2	118500000	119000000	2	2	356500000	357000000	5	0.570832
1_2	119000000	119500000	2	2	358000000	358500000	5	0.570832
1_2	119500000	120000000	6	2	377000000	377500000	5	0.570832
1_2	120000000	120500000	5	2	378000000	378500000	5	0.570832
1_2	120500000	121000000	1	2	388000000	388500000	5	0.570832
1_2	121000000	121500000	2	2	397000000	397500000	5	0.570832
1_2	121500000	122000000	5	2	404000000	404500000	5	0.570832
1_2	122000000	122500000	7	2	418500000	419000000	5	0.570832
1_2	122500000	123000000	1	2	421000000	421500000	5	0.570832
1_2	123000000	123500000	2	2	423000000	423500000	5	0.570832
1_2	123500000	124000000	1	2	431500000	432000000	5	0.570832
1_2	124000000	124500000	3	2	439000000	439500000	5	0.570832
1_2	124500000	125000000	1	2	440000000	440500000	5	0.570832
1_2	125000000	125500000	2	2	442500000	443000000	5	0.570832
1_2	125500000	126000000	1	2	443000000	443500000	5	0.570832
1_2	126000000	126500000	2	2	445500000	446000000	5	0.570832
1_2	126500000	127000000	0	2	458500000	459000000	5	0.570832
1_2	127000000	127500000	2	3	1500000	2000000	5	0.570832
1_2	127500000	128000000	4	3	6000000	6500000	5	0.570832
1_2	128000000	128500000	3	3	9000000	9500000	5	0.570832
1_2	128500000	129000000	2	3	14500000	15000000	5	0.570832
1_2	129000000	129500000	0	3	15000000	15500000	5	0.570832
1_2	129500000	130000000	2	3	16500000	17000000	5	0.570832
1_2	130000000	130500000	1	3	25500000	26000000	5	0.570832
1_2	130500000	131000000	1	3	26000000	26500000	5	0.570832
1_2	131000000	131500000	2	3	32000000	32500000	5	0.570832
1_2	131500000	132000000	0	3	33500000	34000000	5	0.570832
1_2	132000000	132500000	0	3	34000000	34500000	5	0.570832
1_2	132500000	133000000	4	3	39500000	40000000	5	0.570832
1_2	133000000	133500000	0	3	40000000	40500000	5	0.570832
1_2	133500000	134000000	3	3	41000000	41500000	5	0.570832
1_2	134000000	134500000	5	3	42000000	42500000	5	0.570832
1_2	134500000	135000000	2	3	48500000	49000000	5	0.570832
1_2	135000000	135500000	0	3	53500000	54000000	5	0.570832
1_2	135500000	136000000	0	3	61000000	61500000	5	0.570832
1_2	136000000	136500000	1	3	63500000	64000000	5	0.570832
1_2	136500000	137000000	0	3	68000000	68500000	5	0.570832
1_2	137000000	137500000	0	3	69500000	70000000	5	0.570832
1_2	137500000	138000000	2	3	71000000	71500000	5	0.570832
1_2	138000000	138500000	3	3	79000000	79500000	5	0.570832
1_2	138500000	139000000	3	3	81500000	82000000	5	0.570832
1_2	139000000	139500000	11	3	89000000	89500000	5	0.570832
1_2	139500000	140000000	2	3	100500000	101000000	5	0.570832
1_2	140000000	140500000	2	3	107000000	107500000	5	0.570832
1_2	140500000	141000000	3	3	108500000	109000000	5	0.570832
1_2	141000000	141500000	2	3	113000000	113500000	5	0.570832
1_2	141500000	142000000	6	3	114000000	114500000	5	0.570832
1_2	142000000	142500000	0	3	116500000	117000000	5	0.570832
1_2	142500000	143000000	2	3	117500000	118000000	5	0.570832
1_2	143000000	143500000	0	3	121000000	121500000	5	0.570832
1_2	143500000	144000000	4	3	121500000	122000000	5	0.570832
1_2	144000000	144500000	2	3	125500000	126000000	5	0.570832
1_2	144500000	145000000	2	3	130500000	131000000	5	0.570832
1_2	145000000	145500000	3	3	131500000	132000000	5	0.570832
1_2	145500000	146000000	3	3	145000000	145500000	5	0.570832
1_2	146000000	146500000	3	3	148000000	148500000	5	0.570832
1_2	146500000	147000000	2	3	152500000	153000000	5	0.570832
1_2	147000000	147500000	0	3	158500000	159000000	5	0.570832
1_2	147500000	148000000	1	3	165000000	165500000	5	0.570832
1_2	148000000	148500000	1	3	168500000	169000000	5	0.570832
1_2	148500000	149000000	0	3	169000000	169500000	5	0.570832
1_2	149000000	149500000	0	3	169500000	170000000	5	0.570832
1_2	149500000	150000000	3	3	181000000	181500000	5	0.570832
1_2	150000000	150500000	0	3	182000000	182500000	5	0.570832
1_2	150500000	151000000	1	3	183000000	183500000	5	0.570832
1_2	151000000	151500000	1	3	189500000	190000000	5	0.570832
1_2	151500000	152000000	0	3	194500000	195000000	5	0.570832
1_2	152000000	152500000	0	3	200500000	201000000	5	0.570832
1_2	152500000	153000000	3	3	202500000	203000000	5	0.570832
1_2	153000000	153500000	1	3	211500000	212000000	5	0.570832
1_2	153500000	154000000	1	3	218500000	219000000	5	0.570832
1_2	154000000	154500000	2	3	230500000	231000000	5	0.570832
1_2	154500000	155000000	2	3	234000000	234500000	5	0.570832
1_2	155000000	155500000	4	3	239000000	239500000	5	0.570832
1_2	155500000	156000000	3	3	244000000	244500000	5	0.570832
1_2	156000000	156500000	1	3	247500000	248000000	5	0.570832
1_2	156500000	157000000	1	3	250000000	250500000	5	0.570832
1_2	157000000	157500000	1	3	252000000	252500000	5	0.570832
1_2	157500000	158000000	4	3	257000000	257500000	5	0.570832
1_2	158000000	158500000	5	3	261000000	261500000	5	0.570832
1_2	158500000	159000000	7	3	264000000	264500000	5	0.570832
1_2	159000000	159500000	2	4	0	500000	5	0.570832
1_2	159500000	160000000	2	4	12500000	13000000	5	0.570832
1_2	160000000	160500000	3	4	20500000	21000000	5	0.570832
1_2	160500000	161000000	1	4	21000000	21500000	5	0.570832
1_2	161000000	161500000	3	4	21500000	22000000	5	0.570832
1_2	161500000	162000000	3	4	23000000	23500000	5	0.570832
1_2	162000000	162500000	1	4	30000000	30500000	5	0.570832
1_2	162500000	163000000	5	4	41500000	42000000	5	0.570832
1_2	163000000	163500000	1	4	42000000	42500000	5	0.570832
1_2	163500000	164000000	2	4	61000000	61500000	5	0.570832
1_2	164000000	164500000	3	4	74500000	75000000	5	0.570832
1_2	164500000	165000000	3	4	78500000	79000000	5	0.570832
1_2	165000000	165500000	3	4	90000000	90500000	5	0.570832
1_2	165500000	166000000	4	4	105000000	105500000	5	0.570832
1_2	166000000	166500000	1	4	107000000	107500000	5	0.570832
1_2	166500000	167000000	5	4	114000000	114500000	5	0.570832
1_2	167000000	167500000	2	4	117000000	117500000	5	0.570832
1_2	167500000	168000000	2	4	120500000	121000000	5	0.570832
1_2	168000000	168500000	4	4	125500000	126000000	5	0.570832
1_2	168500000	169000000	5	4	144500000	145000000	5	0.570832
1_2	169000000	169500000	2	4	147000000	147500000	5	0.570832
1_2	169500000	170000000	2	4	152000000	152500000	5	0.570832
1_2	170000000	170500000	1	4	154500000	155000000	5	0.570832
1_2	170500000	171000000	1	4	157000000	157500000	5	0.570832
1_2	171000000	171500000	3	4	158000000	158500000	5	0.570832
1_2	171500000	172000000	0	4	159000000	159500000	5	0.570832
1_2	172000000	172500000	2	4	161500000	162000000	5	0.570832
1_2	172500000	173000000	6	4	162000000	162500000	5	0.570832
1_2	173000000	173500000	2	4	162500000	163000000	5	0.570832
1_2	173500000	174000000	1	4	164000000	164500000	5	0.570832
1_2	174000000	174500000	3	4	165000000	165500000	5	0.570832
1_2	174500000	175000000	2	4	167500000	168000000	5	0.570832
1_2	175000000	175500000	2	4	172000000	172500000	5	0.570832
1_2	175500000	176000000	3	4	183000000	183500000	5	0.570832
1_2	176000000	176500000	1	4	188000000	188500000	5	0.570832
1_2	176500000	177000000	1	4	190500000	191000000	5	0.570832
1_2	177000000	177500000	9	4	204500000	205000000	5	0.570832
1_2	177500000	178000000	1	4	206500000	207000000	5	0.570832
1_2	178000000	178500000	0	4	209000000	209500000	5	0.570832
1_2	178500000	179000000	0	4	210000000	210500000	5	0.570832
1_2	179000000	179500000	3	4	214500000	215000000	5	0.570832
1_2	179500000	180000000	0	4	218000000	218500000	5	0.570832
1_2	180000000	180500000	1	4	219000000	219500000	5	0.570832
1_2	180500000	181000000	1	4	225000000	225500000	5	0.570832
1_2	181000000	181500000	0	4	226000000	226500000	5	0.570832
1_2	181500000	182000000	2	5	11500000	12000000	5	0.570832
1_2	182000000	182500000	4	5	22500000	23000000	5	0.570832
1_2	182500000	183000000	0	5	26000000	26500000	5	0.570832
1_2	183000000	183500000	3	5	32000000	32500000	5	0.570832
1_2	183500000	184000000	1	5	36500000	37000000	5	0.570832
1_2	184000000	184500000	2	5	39500000	40000000	5	0.570832
1_2	184500000	185000000	1	5	42000000	42500000	5	0.570832
1_2	185000000	185500000	0	5	42500000	43000000	5	0.570832
1_2	185500000	186000000	0	5	45000000	45500000	5	0.570832
1_2	186000000	186500000	1	5	48500000	49000000	5	0.570832
1_2	186500000	187000000	1	5	70500000	71000000	5	0.570832
1_2	187000000	187500000	1	5	73500000	74000000	5	0.570832
1_2	187500000	188000000	5	5	75000000	75500000	5	0.570832
1_2	188000000	188500000	2	5	83000000	83500000	5	0.570832
1_2	188500000	189000000	4	5	84500000	85000000	5	0.570832
1_2	189000000	189500000	3	5	85500000	86000000	5	0.570832
1_2	189500000	190000000	5	5	88500000	89000000	5	0.570832
1_2	190000000	190500000	3	5	91000000	91500000	5	0.570832
1_2	190500000	191000000	1	5	98000000	98500000	5	0.570832
1_2	191000000	191500000	1	5	105000000	105500000	5	0.570832
1_2	191500000	192000000	3	5	113000000	113500000	5	0.570832
1_2	192000000	192500000	0	5	118000000	118500000	5	0.570832
1_2	192500000	193000000	3	5	122000000	122500000	5	0.570832
1_2	193000000	193500000	3	5	130000000	130500000	5	0.570832
1_2	193500000	194000000	2	5	130500000	131000000	5	0.570832
1_2	194000000	194500000	2	5	141000000	141500000	5	0.570832
1_2	194500000	195000000	8	5	146500000	147000000	5	0.570832
1_2	195000000	195500000	17	5	152000000	152500000	5	0.570832
1_2	195500000	196000000	18	5	152500000	153000000	5	0.570832
1_2	196000000	196500000	30	5	156500000	157000000	5	0.570832
1_2	196500000	197000000	5	5	157000000	157500000	5	0.570832
1_2	197000000	197500000	2	5	169500000	170000000	5	0.570832
1_2	197500000	198000000	0	5	185000000	185500000	5	0.570832
1_2	198000000	198500000	6	5	186500000	187000000	5	0.570832
1_2	198500000	199000000	1	5	193000000	193500000	5	0.570832
1_2	199000000	199500000	4	6	7000000	7500000	5	0.570832
1_2	199500000	200000000	2	6	12500000	13000000	5	0.570832
1_2	200000000	200500000	0	6	14000000	14500000	5	0.570832
1_2	200500000	201000000	1	6	17500000	18000000	5	0.570832
1_2	201000000	201500000	4	6	18000000	18500000	5	0.570832
1_2	201500000	202000000	2	6	18500000	19000000	5	0.570832
1_2	202000000	202500000	2	6	28500000	29000000	5	0.570832
1_2	202500000	203000000	1	6	32500000	33000000	5	0.570832
1_2	203000000	203500000	2	6	33000000	33500000	5	0.570832
1_2	203500000	204000000	0	6	34000000	34500000	5	0.570832
1_2	204000000	204500000	3	6	34500000	35000000	5	0.570832
1_2	204500000	205000000	3	6	35500000	36000000	5	0.570832
1_2	205000000	205500000	1	6	40500000	41000000	5	0.570832
1_2	205500000	206000000	2	6	42000000	42500000	5	0.570832
1_2	206000000	206500000	0	6	42500000	43000000	5	0.570832
1_2	206500000	207000000	0	6	43000000	43500000	5	0.570832
1_2	207000000	207500000	2	6	47000000	47500000	5	0.570832
1_2	207500000	208000000	1	6	52000000	52500000	5	0.570832
1_2	208000000	208500000	3	6	54000000	54500000	5	0.570832
1_2	208500000	209000000	2	6	55500000	56000000	5	0.570832
1_2	209000000	209500000	1	6	67000000	67500000	5	0.570832
1_2	209500000	210000000	0	6	69000000	69500000	5	0.570832
1_2	210000000	210500000	2	6	83500000	84000000	5	0.570832
1_2	210500000	211000000	8	6	86500000	87000000	5	0.570832
1_2	211000000	211500000	0	6	97500000	98000000	5	0.570832
1_2	211500000	212000000	6	6	103000000	103500000	5	0.570832
1_2	212000000	212500000	4	6	118500000	119000000	5	0.570832
1_2	212500000	213000000	1	6	123000000	123500000	5	0.570832
1_2	213000000	213500000	2	6	128500000	129000000	5	0.570832
1_2	213500000	214000000	1	6	130500000	131000000	5	0.570832
1_2	214000000	214500000	3	6	135000000	135500000	5	0.570832
1_2	214500000	215000000	3	6	150500000	151000000	5	0.570832
1_2	215000000	215500000	6	7	4000000	4500000	5	0.570832
1_2	215500000	216000000	1	7	10500000	11000000	5	0.570832
1_2	216000000	216500000	4	7	23000000	23500000	5	0.570832
1_2	216500000	217000000	1	7	28500000	29000000	5	0.570832
1_2	217000000	217500000	3	7	70500000	71000000	5	0.570832
1_2	217500000	218000000	4	7	85000000	85500000	5	0.570832
1_2	218000000	218500000	6	7	93000000	93500000	5	0.570832
1_2	218500000	219000000	2	7	98500000	99000000	5	0.570832
1_2	219000000	219500000	5	7	104500000	105000000	5	0.570832
1_2	219500000	220000000	0	7	107000000	107500000	5	0.570832
1_2	220000000	220500000	2	7	112500000	113000000	5	0.570832
1_2	220500000	221000000	2	7	123500000	124000000	5	0.570832
1_2	221000000	221500000	14	7	124000000	124500000	5	0.570832
1_2	221500000	222000000	3	7	126000000	126500000	5	0.570832
1_2	222000000	222500000	3	8	1000000	1500000	5	0.570832
1_2	222500000	223000000	3	8	4000000	4500000	5	0.570832
1_2	223000000	223500000	1	8	6000000	6500000	5	0.570832
1_2	223500000	224000000	0	8	8000000	8500000	5	0.570832
1_2	224000000	224500000	3	8	9000000	9500000	5	0.570832
1_2	224500000	225000000	2	8	27500000	28000000	5	0.570832
1_2	225000000	225500000	4	8	32500000	33000000	5	0.570832
1_2	225500000	226000000	1	8	39000000	39500000	5	0.570832
1_2	226000000	226500000	2	8	43500000	44000000	5	0.570832
1_2	226500000	227000000	1	8	44000000	44500000	5	0.570832
1_2	227000000	227500000	5	8	54500000	55000000	5	0.570832
1_2	227500000	228000000	2	8	59000000	59500000	5	0.570832
1_2	228000000	228500000	4	8	61500000	62000000	5	0.570832
1_2	228500000	229000000	1	8	81000000	81500000	5	0.570832
1_2	229000000	229500000	6	8	82000000	82500000	5	0.570832
1_2	229500000	230000000	3	8	82500000	83000000	5	0.570832
1_2	230000000	230500000	3	8	84000000	84500000	5	0.570832
1_2	230500000	231000000	1	8	87000000	87500000	5	0.570832
1_2	231000000	231500000	5	8	90000000	90500000	5	0.570832
1_2	231500000	232000000	4	8	91000000	91500000	5	0.570832
1_2	232000000	232500000	4	8	95000000	95500000	5	0.570832
1_2	232500000	233000000	4	8	97500000	98000000	5	0.570832
1_2	233000000	233500000	2	8	98000000	98500000	5	0.570832
1_2	233500000	234000000	1	8	98500000	99000000	5	0.570832
1_2	234000000	234500000	2	9	9000000	9500000	5	0.570832
1_2	234500000	235000000	1	9	12500000	13000000	5	0.570832
1_2	235000000	235500000	2	9	20500000	21000000	5	0.570832
1_2	235500000	236000000	0	X	19500000	20000000	5	0.570832
1_2	236000000	236500000	2	X	30000000	30500000	5	0.570832
1_2	236500000	237000000	3	X	32000000	32500000	5	0.570832
1_2	237000000	237500000	1	X	61500000	62000000	5	0.570832
1_2	237500000	238000000	1	X	126000000	126500000	5	0.570832
1_2	238000000	238500000	0	10	11500000	12000000	4	0.263692
1_2	238500000	239000000	2	10	15500000	16000000	4	0.263692
1_2	239000000	239500000	1	10	16000000	16500000	4	0.263692
1_2	239500000	240000000	0	1_1	4000000	4500000	4	0.263692
1_2	240000000	240500000	2	1_1	9000000	9500000	4	0.263692
1_2	240500000	241000000	3	1_1	10000000	10500000	4	0.263692
1_2	241000000	241500000	1	1_1	15000000	15500000	4	0.263692
1_2	241500000	242000000	0	1_1	15500000	16000000	4	0.263692
1_2	242000000	242500000	1	1_1	20000000	20500000	4	0.263692
1_2	242500000	243000000	3	1_1	24000000	24500000	4	0.263692
1_2	243000000	243500000	1	1_1	26000000	26500000	4	0.263692
1_2	243500000	244000000	4	1_1	29500000	30000000	4	0.263692
1_2	244000000	244500000	2	1_1	37000000	37500000	4	0.263692
1_2	244500000	245000000	0	1_1	48000000	48500000	4	0.263692
1_2	245000000	245500000	3	1_1	52000000	52500000	4	0.263692
1_2	245500000	246000000	2	1_1	54000000	54500000	4	0.263692
1_2	246000000	246500000	0	1_1	54500000	55000000	4	0.263692
1_2	246500000	247000000	0	1_1	67000000	67500000	4	0.263692
1_2	247000000	247500000	1	1_1	84500000	85000000	4	0.263692
1_2	247500000	248000000	3	1_1	88000000	88500000	4	0.263692
1_2	248000000	248500000	1	1_1	93500000	94000000	4	0.263692
1_2	248500000	249000000	2	1_1	94000000	94500000	4	0.263692
1_2	249000000	249500000	3	1_1	127500000	128000000	4	0.263692
1_2	249500000	250000000	1	1_1	130500000	131000000	4	0.263692
1_2	250000000	250500000	0	1_1	133500000	134000000	4	0.263692
1_2	250500000	251000000	2	1_1	136000000	136500000	4	0.263692
1_2	251000000	251500000	0	1_1	142500000	143000000	4	0.263692
1_2	251500000	252000000	0	1_1	146500000	147000000	4	0.263692
1_2	252000000	252500000	4	1_1	148000000	148500000	4	0.263692
1_2	252500000	253000000	3	1_1	151500000	152000000	4	0.263692
1_2	253000000	253500000	1	1_1	159500000	160000000	4	0.263692
1_2	253500000	254000000	3	1_1	162500000	163000000	4	0.263692
1_2	254000000	254500000	4	1_1	166000000	166500000	4	0.263692
1_2	254500000	255000000	4	1_1	168000000	168500000	4	0.263692
1_2	255000000	255500000	3	1_1	168500000	169000000	4	0.263692
1_2	255500000	256000000	1	1_1	176000000	176500000	4	0.263692
1_2	256000000	256500000	1	1_1	179500000	180000000	4	0.263692
1_2	256500000	257000000	2	1_1	187500000	188000000	4	0.263692
1_2	257000000	257500000	1	1_1	188000000	188500000	4	0.263692
1_2	257500000	258000000	2	1_1	192000000	192500000	4	0.263692
1_2	258000000	258500000	2	1_1	199000000	199500000	4	0.263692
1_2	258500000	259000000	3	1_1	202000000	202500000	4	0.263692
1_2	259000000	259500000	0	1_1	203500000	204000000	4	0.263692
1_2	259500000	260000000	1	1_1	204000000	204500000	4	0.263692
1_2	260000000	260500000	2	1_1	213000000	213500000	4	0.263692
1_2	260500000	261000000	4	1_1	216500000	217000000	4	0.263692
1_2	261000000	261500000	1	1_1	220000000	220500000	4	0.263692
1_2	261500000	262000000	2	1_1	223000000	223500000	4	0.263692
1_2	262000000	262500000	5	1_1	223500000	224000000	4	0.263692
1_2	262500000	263000000	4	1_1	224500000	225000000	4	0.263692
1_2	263000000	263500000	1	1_1	225500000	226000000	4	0.263692
1_2	263500000	264000000	4	1_1	226500000	227000000	4	0.263692
1_2	264000000	264500000	0	1_1	230000000	230500000	4	0.263692
1_2	264500000	265000000	2	1_1	250000000	250500000	4	0.263692
1_2	265000000	265500000	6	1_1	270500000	271000000	4	0.263692
1_2	265500000	266000000	0	1_2	1000000	1500000	4	0.263692
1_2	266000000	266500000	1	1_2	5500000	6000000	4	0.263692
1_2	266500000	267000000	7	1_2	7500000	8000000	4	0.263692
1_2	267000000	267500000	1	1_2	8500000	9000000	4	0.263692
1_2	267500000	268000000	1	1_2	16500000	17000000	4	0.263692
1_2	268000000	268500000	3	1_2	20500000	21000000	4	0.263692
1_2	268500000	269000000	3	1_2	29000000	29500000	4	0.263692
1_2	269000000	269500000	1	1_2	31000000	31500000	4	0.263692
1_2	269500000	270000000	4	1_2	33000000	33500000	4	0.263692
1_2	270000000	270500000	4	1_2	35000000	35500000	4	0.263692
1_2	270500000	271000000	2	1_2	37000000	37500000	4	0.263692
1_2	271000000	271500000	7	1_2	37500000	38000000	4	0.263692
1_2	271500000	272000000	2	1_2	41500000	42000000	4	0.263692
1_2	272000000	272500000	3	1_2	43000000	43500000	4	0.263692
1_2	272500000	273000000	9	1_2	45000000	45500000	4	0.263692
1_2	273000000	273500000	4	1_2	45500000	46000000	4	0.263692
1_2	273500000	274000000	5	1_2	47000000	47500000	4	0.263692
1_2	274000000	274391693	3	1_2	48000000	48500000	4	0.263692
2	0	500000	4	1_2	57500000	58000000	4	0.263692
2	500000	1000000	3	1_2	60000000	60500000	4	0.263692
2	1000000	1500000	3	1_2	60500000	61000000	4	0.263692
2	1500000	2000000	3	1_2	65000000	65500000	4	0.263692
2	2000000	2500000	5	1_2	65500000	66000000	4	0.263692
2	2500000	3000000	4	1_2	68500000	69000000	4	0.263692
2	3000000	3500000	4	1_2	69000000	69500000	4	0.263692
2	3500000	4000000	3	1_2	71500000	72000000	4	0.263692
2	4000000	4500000	4	1_2	72500000	73000000	4	0.263692
2	4500000	5000000	6	1_2	75500000	76000000	4	0.263692
2	5000000	5500000	2	1_2	76500000	77000000	4	0.263692
2	5500000	6000000	4	1_2	77500000	78000000	4	0.263692
2	6000000	6500000	11	1_2	78000000	78500000	4	0.263692
2	6500000	7000000	2	1_2	83000000	83500000	4	0.263692
2	7000000	7500000	7	1_2	89000000	89500000	4	0.263692
2	7500000	8000000	4	1_2	91500000	92000000	4	0.263692
2	8000000	8500000	4	1_2	93500000	94000000	4	0.263692
2	8500000	9000000	1	1_2	95500000	96000000	4	0.263692
2	9000000	9500000	5	1_2	96000000	96500000	4	0.263692
2	9500000	10000000	4	1_2	96500000	97000000	4	0.263692
2	10000000	10500000	2	1_2	104500000	105000000	4	0.263692
2	10500000	11000000	5	1_2	105500000	106000000	4	0.263692
2	11000000	11500000	3	1_2	107500000	108000000	4	0.263692
2	11500000	12000000	11	1_2	108500000	109000000	4	0.263692
2	12000000	12500000	8	1_2	110500000	111000000	4	0.263692
2	12500000	13000000	1	1_2	111000000	111500000	4	0.263692
2	13000000	13500000	3	1_2	115000000	115500000	4	0.263692
2	13500000	14000000	5	1_2	115500000	116000000	4	0.263692
2	14000000	14500000	2	1_2	117000000	117500000	4	0.263692
2	14500000	15000000	4	1_2	117500000	118000000	4	0.263692
2	15000000	15500000	1	1_2	127500000	128000000	4	0.263692
2	15500000	16000000	8	1_2	132500000	133000000	4	0.263692
2	16000000	16500000	2	1_2	143500000	144000000	4	0.263692
2	16500000	17000000	6	1_2	155000000	155500000	4	0.263692
2	17000000	17500000	2	1_2	157500000	158000000	4	0.263692
2	17500000	18000000	4	1_2	165500000	166000000	4	0.263692
2	18000000	18500000	3	1_2	168000000	168500000	4	0.263692
2	18500000	19000000	3	1_2	182000000	182500000	4	0.263692
2	19000000	19500000	6	1_2	188500000	189000000	4	0.263692
2	19500000	20000000	6	1_2	199000000	199500000	4	0.263692
2	20000000	20500000	7	1_2	201000000	201500000	4	0.263692
2	20500000	21000000	0	1_2	212000000	212500000	4	0.263692
2	21000000	21500000	5	1_2	216000000	216500000	4	0.263692
2	21500000	22000000	2	1_2	217500000	218000000	4	0.263692
2	22000000	22500000	2	1_2	225000000	225500000	4	0.263692
2	22500000	23000000	7	1_2	228000000	228500000	4	0.263692
2	23000000	23500000	6	1_2	231500000	232000000	4	0.263692
2	23500000	24000000	3	1_2	232000000	232500000	4	0.263692
2	24000000	24500000	1	1_2	232500000	233000000	4	0.263692
2	24500000	25000000	9	1_2	243500000	244000000	4	0.263692
2	25000000	25500000	3	1_2	252000000	252500000	4	0.263692
2	25500000	26000000	3	1_2	254000000	254500000	4	0.263692
2	26000000	26500000	7	1_2	254500000	255000000	4	0.263692
2	26500000	27000000	6	1_2	260500000	261000000	4	0.263692
2	27000000	27500000	4	1_2	262500000	263000000	4	0.263692
2	27500000	28000000	6	1_2	263500000	264000000	4	0.263692
2	28000000	28500000	0	1_2	269500000	270000000	4	0.263692
2	28500000	29000000	5	1_2	270000000	270500000	4	0.263692
2	29000000	29500000	5	1_2	273000000	273500000	4	0.263692
2	29500000	30000000	2	2	0	500000	4	0.263692
2	30000000	30500000	5	2	2500000	3000000	4	0.263692
2	30500000	31000000	0	2	3000000	3500000	4	0.263692
2	31000000	31500000	3	2	4000000	4500000	4	0.263692
2	31500000	32000000	7	2	5500000	6000000	4	0.263692
2	32000000	32500000	2	2	7500000	8000000	4	0.263692
2	32500000	33000000	3	2	8000000	8500000	4	0.263692
2	33000000	33500000	3	2	9500000	10000000	4	0.263692
2	33500000	34000000	8	2	14500000	15000000	4	0.263692
2	34000000	34500000	2	2	17500000	18000000	4	0.263692
2	34500000	35000000	17	2	27000000	27500000	4	0.263692
2	35000000	35500000	4	2	35000000	35500000	4	0.263692
2	35500000	36000000	4	2	35500000	36000000	4	0.263692
2	36000000	36500000	5	2	46500000	47000000	4	0.263692
2	36500000	37000000	5	2	55500000	56000000	4	0.263692
2	37000000	37500000	2	2	58000000	58500000	4	0.263692
2	37500000	38000000	2	2	68500000	69000000	4	0.263692
2	38000000	38500000	2	2	70500000	71000000	4	0.263692
2	38500000	39000000	2	2	74500000	75000000	4	0.263692
2	39000000	39500000	6	2	81000000	81500000	4	0.263692
2	39500000	40000000	2	2	84500000	85000000	4	0.263692
2	40000000	40500000	2	2	88500000	89000000	4	0.263692
2	40500000	41000000	3	2	96000000	96500000	4	0.263692
2	41000000	41500000	28	2	97000000	97500000	4	0.263692
2	41500000	42000000	1	2	101500000	102000000	4	0.263692
2	42000000	42500000	3	2	112500000	113000000	4	0.263692
2	42500000	43000000	3	2	115000000	115500000	4	0.263692
2	43000000	43500000	2	2	121500000	122000000	4	0.263692
2	43500000	44000000	3	2	123000000	123500000	4	0.263692
2	44000000	44500000	0	2	124000000	124500000	4	0.263692
2	44500000	45000000	2	2	126500000	127000000	4	0.263692
2	45000000	45500000	3	2	139500000	140000000	4	0.263692
2	45500000	46000000	3	2	142000000	142500000	4	0.263692
2	46000000	46500000	2	2	144000000	144500000	4	0.263692
2	46500000	47000000	4	2	162500000	163000000	4	0.263692
2	47000000	47500000	3	2	168500000	169000000	4	0.263692
2	47500000	48000000	2	2	179500000	180000000	4	0.263692
2	48000000	48500000	7	2	184000000	184500000	4	0.263692
2	48500000	49000000	7	2	185000000	185500000	4	0.263692
2	49000000	49500000	1	2	190000000	190500000	4	0.263692
2	49500000	50000000	2	2	191500000	192000000	4	0.263692
2	50000000	50500000	6	2	195500000	196000000	4	0.263692
2	50500000	51000000	0	2	203000000	203500000	4	0.263692
2	51000000	51500000	3	2	205500000	206000000	4	0.263692
2	51500000	52000000	5	2	208500000	209000000	4	0.263692
2	52000000	52500000	2	2	218500000	219000000	4	0.263692
2	52500000	53000000	3	2	226500000	227000000	4	0.263692
2	53000000	53500000	1	2	228000000	228500000	4	0.263692
2	53500000	54000000	1	2	238500000	239000000	4	0.263692
2	54000000	54500000	3	2	239500000	240000000	4	0.263692
2	54500000	55000000	1	2	240000000	240500000	4	0.263692
2	55000000	55500000	3	2	251500000	252000000	4	0.263692
2	55500000	56000000	4	2	252500000	253000000	4	0.263692
2	56000000	56500000	0	2	261500000	262000000	4	0.263692
2	56500000	57000000	7	2	262500000	263000000	4	0.263692
2	57000000	57500000	3	2	266500000	267000000	4	0.263692
2	57500000	58000000	2	2	267000000	267500000	4	0.263692
2	58000000	58500000	4	2	274000000	274500000	4	0.263692
2	58500000	59000000	6	2	275000000	275500000	4	0.263692
2	59000000	59500000	3	2	276000000	276500000	4	0.263692
2	59500000	60000000	1	2	276500000	277000000	4	0.263692
2	60000000	60500000	0	2	279500000	280000000	4	0.263692
2	60500000	61000000	2	2	280000000	280500000	4	0.263692
2	61000000	61500000	2	2	294000000	294500000	4	0.263692
2	61500000	62000000	8	2	297500000	298000000	4	0.263692
2	62000000	62500000	3	2	320500000	321000000	4	0.263692
2	62500000	63000000	2	2	324000000	324500000	4	0.263692
2	63000000	63500000	3	2	327000000	327500000	4	0.263692
2	63500000	64000000	3	2	330500000	331000000	4	0.263692
2	64000000	64500000	0	2	332500000	333000000	4	0.263692
2	64500000	65000000	3	2	333500000	334000000	4	0.263692
2	65000000	65500000	3	2	334500000	335000000	4	0.263692
2	65500000	66000000	3	2	336000000	336500000	4	0.263692
2	66000000	66500000	6	2	337000000	337500000	4	0.263692
2	66500000	67000000	1	2	339000000	339500000	4	0.263692
2	67000000	67500000	1	2	340000000	340500000	4	0.263692
2	67500000	68000000	5	2	341000000	341500000	4	0.263692
2	68000000	68500000	2	2	341500000	342000000	4	0.263692
2	68500000	69000000	4	2	342000000	342500000	4	0.263692
2	69000000	69500000	5	2	343000000	343500000	4	0.263692
2	69500000	70000000	5	2	344000000	344500000	4	0.263692
2	70000000	70500000	5	2	346500000	347000000	4	0.263692
2	70500000	71000000	4	2	355500000	356000000	4	0.263692
2	71000000	71500000	2	2	360000000	360500000	4	0.263692
2	71500000	72000000	2	2	364500000	365000000	4	0.263692
2	72000000	72500000	3	2	368000000	368500000	4	0.263692
2	72500000	73000000	3	2	370000000	370500000	4	0.263692
2	73000000	73500000	0	2	373000000	373500000	4	0.263692
2	73500000	74000000	5	2	387500000	388000000	4	0.263692
2	74000000	74500000	3	2	390500000	391000000	4	0.263692
2	74500000	75000000	4	2	393500000	394000000	4	0.263692
2	75000000	75500000	5	2	394000000	394500000	4	0.263692
2	75500000	76000000	2	2	394500000	395000000	4	0.263692
2	76000000	76500000	2	2	396000000	396500000	4	0.263692
2	76500000	77000000	5	2	408500000	409000000	4	0.263692
2	77000000	77500000	1	2	411000000	411500000	4	0.263692
2	77500000	78000000	1	2	413500000	414000000	4	0.263692
2	78000000	78500000	1	2	417000000	417500000	4	0.263692
2	78500000	79000000	1	2	422500000	423000000	4	0.263692
2	79000000	79500000	2	2	423500000	424000000	4	0.263692
2	79500000	80000000	3	2	426500000	427000000	4	0.263692
2	80000000	80500000	3	2	429500000	430000000	4	0.263692
2	80500000	81000000	1	2	433000000	433500000	4	0.263692
2	81000000	81500000	4	2	436500000	437000000	4	0.263692
2	81500000	82000000	2	2	438000000	438500000	4	0.263692
2	82000000	82500000	8	2	442000000	442500000	4	0.263692
2	82500000	83000000	2	2	444000000	444500000	4	0.263692
2	83000000	83500000	3	2	450000000	450500000	4	0.263692
2	83500000	84000000	2	2	451500000	452000000	4	0.263692
2	84000000	84500000	3	2	455500000	456000000	4	0.263692
2	84500000	85000000	4	2	457000000	457500000	4	0.263692
2	85000000	85500000	0	2	460500000	461000000	4	0.263692
2	85500000	86000000	5	3	1000000	1500000	4	0.263692
2	86000000	86500000	2	3	5500000	6000000	4	0.263692
2	86500000	87000000	5	3	8000000	8500000	4	0.263692
2	87000000	87500000	3	3	12000000	12500000	4	0.263692
2	87500000	88000000	2	3	24500000	25000000	4	0.263692
2	88000000	88500000	2	3	27000000	27500000	4	0.263692
2	88500000	89000000	4	3	29000000	29500000	4	0.263692
2	89000000	89500000	2	3	31500000	32000000	4	0.263692
2	89500000	90000000	6	3	36000000	36500000	4	0.263692
2	90000000	90500000	2	3	38000000	38500000	4	0.263692
2	90500000	91000000	5	3	47500000	48000000	4	0.263692
2	91000000	91500000	2	3	49000000	49500000	4	0.263692
2	91500000	92000000	2	3	50500000	51000000	4	0.263692
2	92000000	92500000	2	3	66500000	67000000	4	0.263692
2	92500000	93000000	3	3	70000000	70500000	4	0.263692
2	93000000	93500000	2	3	72000000	72500000	4	0.263692
2	93500000	94000000	8	3	73000000	73500000	4	0.263692
2	94000000	94500000	3	3	74000000	74500000	4	0.263692
2	94500000	95000000	6	3	74500000	75000000	4	0.263692
2	95000000	95500000	2	3	75500000	76000000	4	0.263692
2	95500000	96000000	8	3	76000000	76500000	4	0.263692
2	96000000	96500000	4	3	76500000	77000000	4	0.263692
2	96500000	97000000	3	3	85500000	86000000	4	0.263692
2	97000000	97500000	4	3	89500000	90000000	4	0.263692
2	97500000	98000000	0	3	96000000	96500000	4	0.263692
2	98000000	98500000	1	3	97000000	97500000	4	0.263692
2	98500000	99000000	0	3	98000000	98500000	4	0.263692
2	99000000	99500000	3	3	101500000	102000000	4	0.263692
2	99500000	100000000	2	3	108000000	108500000	4	0.263692
2	100000000	100500000	2	3	112500000	113000000	4	0.263692
2	100500000	101000000	0	3	115500000	116000000	4	0.263692
2	101000000	101500000	0	3	124500000	125000000	4	0.263692
2	101500000	102000000	4	3	125000000	125500000	4	0.263692
2	102000000	102500000	0	3	128500000	129000000	4	0.263692
2	102500000	103000000	2	3	130000000	130500000	4	0.263692
2	103000000	103500000	3	3	134500000	135000000	4	0.263692
2	103500000	104000000	0	3	135000000	135500000	4	0.263692
2	104000000	104500000	3	3	144000000	144500000	4	0.263692
2	104500000	105000000	2	3	149500000	150000000	4	0.263692
2	105000000	105500000	2	3	151500000	152000000	4	0.263692
2	105500000	106000000	0	3	159000000	159500000	4	0.263692
2	106000000	106500000	0	3	159500000	160000000	4	0.263692
2	106500000	107000000	3	3	161500000	162000000	4	0.263692
2	107000000	107500000	1	3	162500000	163000000	4	0.263692
2	107500000	108000000	1	3	172000000	172500000	4	0.263692
2	108000000	108500000	2	3	177500000	178000000	4	0.263692
2	108500000	109000000	3	3	179000000	179500000	4	0.263692
2	109000000	109500000	1	3	180500000	181000000	4	0.263692
2	109500000	110000000	2	3	185000000	185500000	4	0.263692
2	110000000	110500000	0	3	185500000	186000000	4	0.263692
2	110500000	111000000	3	3	187000000	187500000	4	0.263692
2	111000000	111500000	2	3	188000000	188500000	4	0.263692
2	111500000	112000000	3	3	194000000	194500000	4	0.263692
2	112000000	112500000	1	3	197000000	197500000	4	0.263692
2	112500000	113000000	4	3	198000000	198500000	4	0.263692
2	113000000	113500000	2	3	201500000	202000000	4	0.263692
2	113500000	114000000	1	3	203500000	204000000	4	0.263692
2	114000000	114500000	0	3	211000000	211500000	4	0.263692
2	114500000	115000000	1	3	225000000	225500000	4	0.263692
2	115000000	115500000	4	3	228000000	228500000	4	0.263692
2	115500000	116000000	2	3	229000000	229500000	4	0.263692
2	116000000	116500000	2	3	238500000	239000000	4	0.263692
2	116500000	117000000	1	3	245500000	246000000	4	0.263692
2	117000000	117500000	2	3	247000000	247500000	4	0.263692
2	117500000	118000000	2	3	248500000	249000000	4	0.263692
2	118000000	118500000	1	3	254500000	255000000	4	0.263692
2	118500000	119000000	2	3	257500000	258000000	4	0.263692
2	119000000	119500000	3	3	258500000	259000000	4	0.263692
2	119500000	120000000	1	3	261500000	262000000	4	0.263692
2	120000000	120500000	1	3	262500000	263000000	4	0.263692
2	120500000	121000000	1	3	263000000	263500000	4	0.263692
2	121000000	121500000	3	3	268500000	269000000	4	0.263692
2	121500000	122000000	4	3	275000000	275500000	4	0.263692
2	122000000	122500000	1	4	8000000	8500000	4	0.263692
2	122500000	123000000	1	4	9000000	9500000	4	0.263692
2	123000000	123500000	4	4	13500000	14000000	4	0.263692
2	123500000	124000000	2	4	17500000	18000000	4	0.263692
2	124000000	124500000	4	4	19000000	19500000	4	0.263692
2	124500000	125000000	0	4	22500000	23000000	4	0.263692
2	125000000	125500000	1	4	25000000	25500000	4	0.263692
2	125500000	126000000	2	4	29500000	30000000	4	0.263692
2	126000000	126500000	1	4	30500000	31000000	4	0.263692
2	126500000	127000000	4	4	34000000	34500000	4	0.263692
2	127000000	127500000	1	4	36000000	36500000	4	0.263692
2	127500000	128000000	0	4	36500000	37000000	4	0.263692
2	128000000	128500000	2	4	40500000	41000000	4	0.263692
2	128500000	129000000	0	4	50000000	50500000	4	0.263692
2	129000000	129500000	0	4	58000000	58500000	4	0.263692
2	129500000	130000000	1	4	63000000	63500000	4	0.263692
2	130000000	130500000	2	4	64000000	64500000	4	0.263692
2	130500000	131000000	3	4	65000000	65500000	4	0.263692
2	131000000	131500000	1	4	69500000	70000000	4	0.263692
2	131500000	132000000	1	4	71000000	71500000	4	0.263692
2	132000000	132500000	1	4	77000000	77500000	4	0.263692
2	132500000	133000000	3	4	81500000	82000000	4	0.263692
2	133000000	133500000	2	4	82000000	82500000	4	0.263692
2	133500000	134000000	0	4	83000000	83500000	4	0.263692
2	134000000	134500000	0	4	86000000	86500000	4	0.263692
2	134500000	135000000	2	4	88500000	89000000	4	0.263692
2	135000000	135500000	0	4	90500000	91000000	4	0.263692
2	135500000	136000000	1	4	94500000	95000000	4	0.263692
2	136000000	136500000	3	4	96000000	96500000	4	0.263692
2	136500000	137000000	0	4	96500000	97000000	4	0.263692
2	137000000	137500000	2	4	98500000	99000000	4	0.263692
2	137500000	138000000	3	4	100000000	100500000	4	0.263692
2	138000000	138500000	0	4	107500000	108000000	4	0.263692
2	138500000	139000000	0	4	110000000	110500000	4	0.263692
2	139000000	139500000	1	4	114500000	115000000	4	0.263692
2	139500000	140000000	4	4	116500000	117000000	4	0.263692
2	140000000	140500000	1	4	123500000	124000000	4	0.263692
2	140500000	141000000	2	4	125000000	125500000	4	0.263692
2	141000000	141500000	1	4	132000000	132500000	4	0.263692
2	141500000	142000000	2	4	132500000	133000000	4	0.263692
2	142000000	142500000	4	4	133500000	134000000	4	0.263692
2	142500000	143000000	1	4	141500000	142000000	4	0.263692
2	143000000	143500000	1	4	144000000	144500000	4	0.263692
2	143500000	144000000	0	4	145000000	145500000	4	0.263692
2	144000000	144500000	4	4	146500000	147000000	4	0.263692
2	144500000	145000000	1	4	156500000	157000000	4	0.263692
2	145000000	145500000	1	4	160000000	160500000	4	0.263692
2	145500000	146000000	5	4	163000000	163500000	4	0.263692
2	146000000	146500000	3	4	169500000	170000000	4	0.263692
2	146500000	147000000	3	4	170500000	171000000	4	0.263692
2	147000000	147500000	2	4	173500000	174000000	4	0.263692
2	147500000	148000000	3	4	176500000	177000000	4	0.263692
2	148000000	148500000	0	4	190000000	190500000	4	0.263692
2	148500000	149000000	1	4	191000000	191500000	4	0.263692
2	149000000	149500000	1	4	191500000	192000000	4	0.263692
2	149500000	150000000	0	4	196000000	196500000	4	0.263692
2	150000000	150500000	2	4	197000000	197500000	4	0.263692
2	150500000	151000000	0	4	201000000	201500000	4	0.263692
2	151000000	151500000	3	4	203500000	204000000	4	0.263692
2	151500000	152000000	0	4	210500000	211000000	4	0.263692
2	152000000	152500000	3	4	212000000	212500000	4	0.263692
2	152500000	153000000	1	4	213000000	213500000	4	0.263692
2	153000000	153500000	0	4	215000000	215500000	4	0.263692
2	153500000	154000000	0	4	215500000	216000000	4	0.263692
2	154000000	154500000	5	4	216000000	216500000	4	0.263692
2	154500000	155000000	1	4	218500000	219000000	4	0.263692
2	155000000	155500000	0	4	222000000	222500000	4	0.263692
2	155500000	156000000	0	4	222500000	223000000	4	0.263692
2	156000000	156500000	1	4	230000000	230500000	4	0.263692
2	156500000	157000000	1	5	11000000	11500000	4	0.263692
2	157000000	157500000	0	5	14500000	15000000	4	0.263692
2	157500000	158000000	1	5	16500000	17000000	4	0.263692
2	158000000	158500000	1	5	31000000	31500000	4	0.263692
2	158500000	159000000	2	5	31500000	32000000	4	0.263692
2	159000000	159500000	1	5	38500000	39000000	4	0.263692
2	159500000	160000000	2	5	46000000	46500000	4	0.263692
2	160000000	160500000	0	5	49000000	49500000	4	0.263692
2	160500000	161000000	2	5	49500000	50000000	4	0.263692
2	161000000	161500000	2	5	54500000	55000000	4	0.263692
2	161500000	162000000	2	5	55000000	55500000	4	0.263692
2	162000000	162500000	2	5	58000000	58500000	4	0.263692
2	162500000	163000000	4	5	61000000	61500000	4	0.263692
2	163000000	163500000	1	5	64000000	64500000	4	0.263692
2	163500000	164000000	3	5	70000000	70500000	4	0.263692
2	164000000	164500000	0	5	74500000	75000000	4	0.263692
2	164500000	165000000	6	5	75500000	76000000	4	0.263692
2	165000000	165500000	2	5	87000000	87500000	4	0.263692
2	165500000	166000000	1	5	88000000	88500000	4	0.263692
2	166000000	166500000	0	5	92000000	92500000	4	0.263692
2	166500000	167000000	0	5	94000000	94500000	4	0.263692
2	167000000	167500000	1	5	94500000	95000000	4	0.263692
2	167500000	168000000	3	5	95000000	95500000	4	0.263692
2	168000000	168500000	1	5	99500000	100000000	4	0.263692
2	168500000	169000000	4	5	103000000	103500000	4	0.263692
2	169000000	169500000	2	5	103500000	104000000	4	0.263692
2	169500000	170000000	0	5	104000000	104500000	4	0.263692
2	170000000	170500000	3	5	107500000	108000000	4	0.263692
2	170500000	171000000	1	5	110500000	111000000	4	0.263692
2	171000000	171500000	2	5	115500000	116000000	4	0.263692
2	171500000	172000000	0	5	116000000	116500000	4	0.263692
2	172000000	172500000	0	5	117000000	117500000	4	0.263692
2	172500000	173000000	2	5	118500000	119000000	4	0.263692
2	173000000	173500000	3	5	119000000	119500000	4	0.263692
2	173500000	174000000	5	5	121000000	121500000	4	0.263692
2	174000000	174500000	6	5	127500000	128000000	4	0.263692
2	174500000	175000000	1	5	137500000	138000000	4	0.263692
2	175000000	175500000	1	5	141500000	142000000	4	0.263692
2	175500000	176000000	2	5	148000000	148500000	4	0.263692
2	176000000	176500000	5	5	155000000	155500000	4	0.263692
2	176500000	177000000	6	5	162500000	163000000	4	0.263692
2	177000000	177500000	0	5	165500000	166000000	4	0.263692
2	177500000	178000000	1	5	170500000	171000000	4	0.263692
2	178000000	178500000	3	5	184000000	184500000	4	0.263692
2	178500000	179000000	3	5	184500000	185000000	4	0.263692
2	179000000	179500000	9	5	188500000	189000000	4	0.263692
2	179500000	180000000	4	5	192500000	193000000	4	0.263692
2	180000000	180500000	1	6	500000	1000000	4	0.263692
2	180500000	181000000	3	6	6500000	7000000	4	0.263692
2	181000000	181500000	1	6	8500000	9000000	4	0.263692
2	181500000	182000000	3	6	9500000	10000000	4	0.263692
2	182000000	182500000	3	6	10000000	10500000	4	0.263692
2	182500000	183000000	7	6	13000000	13500000	4	0.263692
2	183000000	183500000	5	6	16000000	16500000	4	0.263692
2	183500000	184000000	0	6	19500000	20000000	4	0.263692
2	184000000	184500000	4	6	21000000	21500000	4	0.263692
2	184500000	185000000	6	6	28000000	28500000	4	0.263692
2	185000000	185500000	4	6	30500000	31000000	4	0.263692
2	185500000	186000000	3	6	33500000	34000000	4	0.263692
2	186000000	186500000	1	6	52500000	53000000	4	0.263692
2	186500000	187000000	3	6	58000000	58500000	4	0.263692
2	187000000	187500000	1	6	60000000	60500000	4	0.263692
2	187500000	188000000	1	6	70000000	70500000	4	0.263692
2	188000000	188500000	2	6	74000000	74500000	4	0.263692
2	188500000	189000000	2	6	77000000	77500000	4	0.263692
2	189000000	189500000	2	6	81000000	81500000	4	0.263692
2	189500000	190000000	3	6	81500000	82000000	4	0.263692
2	190000000	190500000	4	6	88000000	88500000	4	0.263692
2	190500000	191000000	2	6	91500000	92000000	4	0.263692
2	191000000	191500000	3	6	92500000	93000000	4	0.263692
2	191500000	192000000	4	6	93000000	93500000	4	0.263692
2	192000000	192500000	5	6	93500000	94000000	4	0.263692
2	192500000	193000000	2	6	95000000	95500000	4	0.263692
2	193000000	193500000	2	6	96000000	96500000	4	0.263692
2	193500000	194000000	1	6	98000000	98500000	4	0.263692
2	194000000	194500000	7	6	100500000	101000000	4	0.263692
2	194500000	195000000	3	6	102500000	103000000	4	0.263692
2	195000000	195500000	10	6	104500000	105000000	4	0.263692
2	195500000	196000000	4	6	108000000	108500000	4	0.263692
2	196000000	196500000	6	6	115000000	115500000	4	0.263692
2	196500000	197000000	2	6	116500000	117000000	4	0.263692
2	197000000	197500000	3	6	119000000	119500000	4	0.263692
2	197500000	198000000	7	6	122000000	122500000	4	0.263692
2	198000000	198500000	1	6	126000000	126500000	4	0.263692
2	198500000	199000000	6	6	129500000	130000000	4	0.263692
2	199000000	199500000	6	6	148000000	148500000	4	0.263692
2	199500000	200000000	2	6	152000000	152500000	4	0.263692
2	200000000	200500000	2	6	152500000	153000000	4	0.263692
2	200500000	201000000	0	7	0	500000	4	0.263692
2	201000000	201500000	1	7	500000	1000000	4	0.263692
2	201500000	202000000	1	7	5500000	6000000	4	0.263692
2	202000000	202500000	1	7	8500000	9000000	4	0.263692
2	202500000	203000000	2	7	18500000	19000000	4	0.263692
2	203000000	203500000	4	7	21000000	21500000	4	0.263692
2	203500000	204000000	1	7	23500000	24000000	4	0.263692
2	204000000	204500000	1	7	30000000	30500000	4	0.263692
2	204500000	205000000	1	7	35000000	35500000	4	0.263692
2	205000000	205500000	1	7	42000000	42500000	4	0.263692
2	205500000	206000000	4	7	46000000	46500000	4	0.263692
2	206000000	206500000	0	7	46500000	47000000	4	0.263692
2	206500000	207000000	1	7	51000000	51500000	4	0.263692
2	207000000	207500000	2	7	60500000	61000000	4	0.263692
2	207500000	208000000	1	7	77500000	78000000	4	0.263692
2	208000000	208500000	3	7	81000000	81500000	4	0.263692
2	208500000	209000000	4	7	84000000	84500000	4	0.263692
2	209000000	209500000	2	7	89500000	90000000	4	0.263692
2	209500000	210000000	1	7	90000000	90500000	4	0.263692
2	210000000	210500000	0	7	91000000	91500000	4	0.263692
2	210500000	211000000	1	7	92500000	93000000	4	0.263692
2	211000000	211500000	1	7	96000000	96500000	4	0.263692
2	211500000	212000000	2	7	97500000	98000000	4	0.263692
2	212000000	212500000	1	7	101000000	101500000	4	0.263692
2	212500000	213000000	1	7	118000000	118500000	4	0.263692
2	213000000	213500000	0	7	119000000	119500000	4	0.263692
2	213500000	214000000	2	7	122500000	123000000	4	0.263692
2	214000000	214500000	0	7	133500000	134000000	4	0.263692
2	214500000	215000000	0	8	7500000	8000000	4	0.263692
2	215000000	215500000	0	8	12000000	12500000	4	0.263692
2	215500000	216000000	6	8	12500000	13000000	4	0.263692
2	216000000	216500000	2	8	21000000	21500000	4	0.263692
2	216500000	217000000	2	8	21500000	22000000	4	0.263692
2	217000000	217500000	1	8	22000000	22500000	4	0.263692
2	217500000	218000000	1	8	23000000	23500000	4	0.263692
2	218000000	218500000	1	8	29000000	29500000	4	0.263692
2	218500000	219000000	4	8	32000000	32500000	4	0.263692
2	219000000	219500000	1	8	34500000	35000000	4	0.263692
2	219500000	220000000	2	8	36000000	36500000	4	0.263692
2	220000000	220500000	1	8	38500000	39000000	4	0.263692
2	220500000	221000000	0	8	40500000	41000000	4	0.263692
2	221000000	221500000	2	8	41000000	41500000	4	0.263692
2	221500000	222000000	0	8	46500000	47000000	4	0.263692
2	222000000	222500000	1	8	52500000	53000000	4	0.263692
2	222500000	223000000	3	8	55000000	55500000	4	0.263692
2	223000000	223500000	2	8	55500000	56000000	4	0.263692
2	223500000	224000000	1	8	56500000	57000000	4	0.263692
2	224000000	224500000	2	8	59500000	60000000	4	0.263692
2	224500000	225000000	0	8	62000000	62500000	4	0.263692
2	225000000	225500000	2	8	67000000	67500000	4	0.263692
2	225500000	226000000	0	8	77000000	77500000	4	0.263692
2	226000000	226500000	3	8	79000000	79500000	4	0.263692
2	226500000	227000000	4	8	85000000	85500000	4	0.263692
2	227000000	227500000	2	8	86500000	87000000	4	0.263692
2	227500000	228000000	2	8	93500000	94000000	4	0.263692
2	228000000	228500000	4	8	94500000	95000000	4	0.263692
2	228500000	229000000	3	9	10500000	11000000	4	0.263692
2	229000000	229500000	5	9	22500000	23000000	4	0.263692
2	229500000	230000000	2	9	25000000	25500000	4	0.263692
2	230000000	230500000	8	9	26000000	26500000	4	0.263692
2	230500000	231000000	8	X	12500000	13000000	4	0.263692
2	231000000	231500000	2	X	21000000	21500000	4	0.263692
2	231500000	232000000	1	X	22500000	23000000	4	0.263692
2	232000000	232500000	7	X	39000000	39500000	4	0.263692
2	232500000	233000000	7	X	41500000	42000000	4	0.263692
2	233000000	233500000	3	X	48000000	48500000	4	0.263692
2	233500000	234000000	6	X	54500000	55000000	4	0.263692
2	234000000	234500000	3	X	57000000	57500000	4	0.263692
2	234500000	235000000	2	X	60500000	61000000	4	0.263692
2	235000000	235500000	3	X	61000000	61500000	4	0.263692
2	235500000	236000000	3	X	63000000	63500000	4	0.263692
2	236000000	236500000	3	X	68000000	68500000	4	0.263692
2	236500000	237000000	7	X	72000000	72500000	4	0.263692
2	237000000	237500000	2	X	91500000	92000000	4	0.263692
2	237500000	238000000	1	X	97500000	98000000	4	0.263692
2	238000000	238500000	3	X	99500000	100000000	4	0.263692
2	238500000	239000000	4	X	110000000	110500000	4	0.263692
2	239000000	239500000	1	X	111000000	111500000	4	0.263692
2	239500000	240000000	4	X	120000000	120500000	4	0.263692
2	240000000	240500000	4	X	120500000	121000000	4	0.263692
2	240500000	241000000	3	X	122000000	122500000	4	0.263692
2	241000000	241500000	2	X	123500000	124000000	4	0.263692
2	241500000	242000000	3	10	5000000	5500000	3	-0.0434481
2	242000000	242500000	1	10	8500000	9000000	3	-0.0434481
2	242500000	243000000	1	10	14000000	14500000	3	-0.0434481
2	243000000	243500000	3	10	16500000	17000000	3	-0.0434481
2	243500000	244000000	0	10	17500000	18000000	3	-0.0434481
2	244000000	244500000	3	10	29000000	29500000	3	-0.0434481
2	244500000	245000000	2	1_1	0	500000	3	-0.0434481
2	245000000	245500000	2	1_1	1000000	1500000	3	-0.0434481
2	245500000	246000000	5	1_1	7500000	8000000	3	-0.0434481
2	246000000	246500000	0	1_1	11500000	12000000	3	-0.0434481
2	246500000	247000000	5	1_1	13500000	14000000	3	-0.0434481
2	247000000	247500000	3	1_1	14000000	14500000	3	-0.0434481
2	247500000	248000000	7	1_1	17500000	18000000	3	-0.0434481
2	248000000	248500000	3	1_1	20500000	21000000	3	-0.0434481
2	248500000	249000000	3	1_1	22000000	22500000	3	-0.0434481
2	249000000	249500000	0	1_1	30000000	30500000	3	-0.0434481
2	249500000	250000000	5	1_1	30500000	31000000	3	-0.0434481
2	250000000	250500000	2	1_1	33500000	34000000	3	-0.0434481
2	250500000	251000000	1	1_1	34500000	35000000	3	-0.0434481
2	251000000	251500000	1	1_1	35500000	36000000	3	-0.0434481
2	251500000	252000000	4	1_1	37500000	38000000	3	-0.0434481
2	252000000	252500000	3	1_1	39000000	39500000	3	-0.0434481
2	252500000	253000000	4	1_1	46500000	47000000	3	-0.0434481
2	253000000	253500000	3	1_1	48500000	49000000	3	-0.0434481
2	253500000	254000000	1	1_1	51000000	51500000	3	-0.0434481
2	254000000	254500000	2	1_1	56000000	56500000	3	-0.0434481
2	254500000	255000000	3	1_1	57500000	58000000	3	-0.0434481
2	255000000	255500000	2	1_1	58500000	59000000	3	-0.0434481
2	255500000	256000000	5	1_1	59500000	60000000	3	-0.0434481
2	256000000	256500000	9	1_1	60000000	60500000	3	-0.0434481
2	256500000	257000000	3	1_1	60500000	61000000	3	-0.0434481
2	257000000	257500000	1	1_1	61000000	61500000	3	-0.0434481
2	257500000	258000000	3	1_1	74000000	74500000	3	-0.0434481
2	258000000	258500000	2	1_1	74500000	75000000	3	-0.0434481
2	258500000	259000000	2	1_1	77500000	78000000	3	-0.0434481
2	259000000	259500000	6	1_1	85500000	86000000	3	-0.0434481
2	259500000	260000000	2	1_1	86000000	86500000	3	-0.0434481
2	260000000	260500000	1	1_1	89000000	89500000	3	-0.0434481
2	260500000	261000000	3	1_1	90000000	90500000	3	-0.0434481
2	261000000	261500000	3	1_1	96000000	96500000	3	-0.0434481
2	261500000	262000000	4	1_1	103000000	103500000	3	-0.0434481
2	262000000	262500000	5	1_1	110000000	110500000	3	-0.0434481
2	262500000	263000000	4	1_1	110500000	111000000	3	-0.0434481
2	263000000	263500000	3	1_1	112500000	113000000	3	-0.0434481
2	263500000	264000000	7	1_1	120500000	121000000	3	-0.0434481
2	264000000	264500000	5	1_1	123500000	124000000	3	-0.0434481
2	264500000	265000000	8	1_1	124000000	124500000	3	-0.0434481
2	265000000	265500000	2	1_1	130000000	130500000	3	-0.0434481
2	265500000	266000000	1	1_1	132000000	132500000	3	-0.0434481
2	266000000	266500000	0	1_1	135500000	136000000	3	-0.0434481
2	266500000	267000000	4	1_1	136500000	137000000	3	-0.0434481
2	267000000	267500000	4	1_1	138000000	138500000	3	-0.0434481
2	267500000	268000000	3	1_1	139500000	140000000	3	-0.0434481
2	268000000	268500000	2	1_1	140500000	141000000	3	-0.0434481
2	268500000	269000000	3	1_1	141500000	142000000	3	-0.0434481
2	269000000	269500000	6	1_1	147000000	147500000	3	-0.0434481
2	269500000	270000000	5	1_1	155500000	156000000	3	-0.0434481
2	270000000	270500000	0	1_1	158500000	159000000	3	-0.0434481
2	270500000	271000000	2	1_1	160500000	161000000	3	-0.0434481
2	271000000	271500000	1	1_1	162000000	162500000	3	-0.0434481
2	271500000	272000000	2	1_1	165000000	165500000	3	-0.0434481
2	272000000	272500000	3	1_1	167000000	167500000	3	-0.0434481
2	272500000	273000000	1	1_1	170000000	170500000	3	-0.0434481
2	273000000	273500000	1	1_1	170500000	171000000	3	-0.0434481
2	273500000	274000000	2	1_1	172500000	173000000	3	-0.0434481
2	274000000	274500000	4	1_1	180500000	181000000	3	-0.0434481
2	274500000	275000000	2	1_1	183000000	183500000	3	-0.0434481
2	275000000	275500000	4	1_1	184000000	184500000	3	-0.0434481
2	275500000	276000000	3	1_1	184500000	185000000	3	-0.0434481
2	276000000	276500000	4	1_1	190000000	190500000	3	-0.0434481
2	276500000	277000000	4	1_1	198500000	199000000	3	-0.0434481
2	277000000	277500000	2	1_1	202500000	203000000	3	-0.0434481
2	277500000	278000000	0	1_1	203000000	203500000	3	-0.0434481
2	278000000	278500000	0	1_1	206500000	207000000	3	-0.0434481
2	278500000	279000000	5	1_1	208000000	208500000	3	-0.0434481
2	279000000	279500000	3	1_1	210500000	211000000	3	-0.0434481
2	279500000	280000000	4	1_1	222000000	222500000	3	-0.0434481
2	280000000	280500000	4	1_1	222500000	223000000	3	-0.0434481
2	280500000	281000000	0	1_1	224000000	224500000	3	-0.0434481
2	281000000	281500000	1	1_1	228000000	228500000	3	-0.0434481
2	281500000	282000000	7	1_1	229500000	230000000	3	-0.0434481
2	282000000	282500000	2	1_1	230500000	231000000	3	-0.0434481
2	282500000	283000000	7	1_1	231500000	232000000	3	-0.0434481
2	283000000	283500000	2	1_1	233500000	234000000	3	-0.0434481
2	283500000	284000000	2	1_1	234000000	234500000	3	-0.0434481
2	284000000	284500000	1	1_1	241500000	242000000	3	-0.0434481
2	284500000	285000000	3	1_1	242500000	243000000	3	-0.0434481
2	285000000	285500000	3	1_1	246000000	246500000	3	-0.0434481
2	285500000	286000000	3	1_1	255000000	255500000	3	-0.0434481
2	286000000	286500000	2	1_1	257000000	257500000	3	-0.0434481
2	286500000	287000000	8	1_1	258000000	258500000	3	-0.0434481
2	287000000	287500000	3	1_1	259500000	260000000	3	-0.0434481
2	287500000	288000000	0	1_1	260000000	260500000	3	-0.0434481
2	288000000	288500000	2	1_1	261000000	261500000	3	-0.0434481
2	288500000	289000000	8	1_1	262000000	262500000	3	-0.0434481
2	289000000	289500000	0	1_1	264000000	264500000	3	-0.0434481
2	289500000	290000000	1	1_1	264500000	265000000	3	-0.0434481
2	290000000	290500000	3	1_1	265500000	266000000	3	-0.0434481
2	290500000	291000000	2	1_1	269000000	269500000	3	-0.0434481
2	291000000	291500000	0	1_1	273500000	274000000	3	-0.0434481
2	291500000	292000000	1	1_1	274500000	275000000	3	-0.0434481
2	292000000	292500000	1	1_1	275000000	275500000	3	-0.0434481
2	292500000	293000000	0	1_2	500000	1000000	3	-0.0434481
2	293000000	293500000	0	1_2	1500000	2000000	3	-0.0434481
2	293500000	294000000	1	1_2	4500000	5000000	3	-0.0434481
2	294000000	294500000	4	1_2	6500000	7000000	3	-0.0434481
2	294500000	295000000	3	1_2	9000000	9500000	3	-0.0434481
2	295000000	295500000	3	1_2	9500000	10000000	3	-0.0434481
2	295500000	296000000	2	1_2	10000000	10500000	3	-0.0434481
2	296000000	296500000	1	1_2	11000000	11500000	3	-0.0434481
2	296500000	297000000	2	1_2	14000000	14500000	3	-0.0434481
2	297000000	297500000	2	1_2	14500000	15000000	3	-0.0434481
2	297500000	298000000	4	1_2	20000000	20500000	3	-0.0434481
2	298000000	298500000	1	1_2	24500000	25000000	3	-0.0434481
2	298500000	299000000	2	1_2	26500000	27000000	3	-0.0434481
2	299000000	299500000	1	1_2	29500000	30000000	3	-0.0434481
2	299500000	300000000	3	1_2	32500000	33000000	3	-0.0434481
2	300000000	300500000	1	1_2	38500000	39000000	3	-0.0434481
2	300500000	301000000	0	1_2	41000000	41500000	3	-0.0434481
2	301000000	301500000	0	1_2	42500000	43000000	3	-0.0434481
2	301500000	302000000	1	1_2	52500000	53000000	3	-0.0434481
2	302000000	302500000	3	1_2	53500000	54000000	3	-0.0434481
2	302500000	303000000	1	1_2	56000000	56500000	3	-0.0434481
2	303000000	303500000	1	1_2	57000000	57500000	3	-0.0434481
2	303500000	304000000	3	1_2	58500000	59000000	3	-0.0434481
2	304000000	304500000	1	1_2	59500000	60000000	3	-0.0434481
2	304500000	305000000	1	1_2	61000000	61500000	3	-0.0434481
2	305000000	305500000	2	1_2	62500000	63000000	3	-0.0434481
2	305500000	306000000	2	1_2	64500000	65000000	3	-0.0434481
2	306000000	306500000	0	1_2	68000000	68500000	3	-0.0434481
2	306500000	307000000	1	1_2	71000000	71500000	3	-0.0434481
2	307000000	307500000	5	1_2	73000000	73500000	3	-0.0434481
2	307500000	308000000	2	1_2	78500000	79000000	3	-0.0434481
2	308000000	308500000	2	1_2	79000000	79500000	3	-0.0434481
2	308500000	309000000	2	1_2	82500000	83000000	3	-0.0434481
2	309000000	309500000	5	1_2	87000000	87500000	3	-0.0434481
2	309500000	310000000	1	1_2	87500000	88000000	3	-0.0434481
2	310000000	310500000	5	1_2	93000000	93500000	3	-0.0434481
2	310500000	311000000	0	1_2	94500000	95000000	3	-0.0434481
2	311000000	311500000	2	1_2	95000000	95500000	3	-0.0434481
2	311500000	312000000	2	1_2	98500000	99000000	3	-0.0434481
2	312000000	312500000	0	1_2	100000000	100500000	3	-0.0434481
2	312500000	313000000	0	1_2	100500000	101000000	3	-0.0434481
2	313000000	313500000	0	1_2	103500000	104000000	3	-0.0434481
2	313500000	314000000	0	1_2	104000000	104500000	3	-0.0434481
2	314000000	314500000	1	1_2	109500000	110000000	3	-0.0434481
2	314500000	315000000	2	1_2	110000000	110500000	3	-0.0434481
2	315000000	315500000	1	1_2	118000000	118500000	3	-0.0434481
2	315500000	316000000	1	1_2	124000000	124500000	3	-0.0434481
2	316000000	316500000	1	1_2	128000000	128500000	3	-0.0434481
2	316500000	317000000	1	1_2	133500000	134000000	3	-0.0434481
2	317000000	317500000	0	1_2	138000000	138500000	3	-0.0434481
2	317500000	318000000	2	1_2	138500000	139000000	3	-0.0434481
2	318000000	318500000	5	1_2	140500000	141000000	3	-0.0434481
2	318500000	319000000	3	1_2	145000000	145500000	3	-0.0434481
2	319000000	319500000	1	1_2	145500000	146000000	3	-0.0434481
2	319500000	320000000	2	1_2	146000000	146500000	3	-0.0434481
2	320000000	320500000	3	1_2	149500000	150000000	3	-0.0434481
2	320500000	321000000	4	1_2	152500000	153000000	3	-0.0434481
2	321000000	321500000	2	1_2	155500000	156000000	3	-0.0434481
2	321500000	322000000	5	1_2	160000000	160500000	3	-0.0434481
2	322000000	322500000	0	1_2	161000000	161500000	3	-0.0434481
2	322500000	323000000	5	1_2	161500000	162000000	3	-0.0434481
2	323000000	323500000	1	1_2	164000000	164500000	3	-0.0434481
2	323500000	324000000	5	1_2	164500000	165000000	3	-0.0434481
2	324000000	324500000	4	1_2	165000000	165500000	3	-0.0434481
2	324500000	325000000	0	1_2	171000000	171500000	3	-0.0434481
2	325000000	325500000	2	1_2	174000000	174500000	3	-0.0434481
2	325500000	326000000	5	1_2	175500000	176000000	3	-0.0434481
2	326000000	326500000	6	1_2	179000000	179500000	3	-0.0434481
2	326500000	327000000	6	1_2	183000000	183500000	3	-0.0434481
2	327000000	327500000	4	1_2	189000000	189500000	3	-0.0434481
2	327500000	328000000	5	1_2	190000000	190500000	3	-0.0434481
2	328000000	328500000	9	1_2	191500000	192000000	3	-0.0434481
2	328500000	329000000	1	1_2	192500000	193000000	3	-0.0434481
2	329000000	329500000	6	1_2	193000000	193500000	3	-0.0434481
2	329500000	330000000	3	1_2	204000000	204500000	3	-0.0434481
2	330000000	330500000	5	1_2	204500000	205000000	3	-0.0434481
2	330500000	331000000	4	1_2	208000000	208500000	3	-0.0434481
2	331000000	331500000	2	1_2	214000000	214500000	3	-0.0434481
2	331500000	332000000	3	1_2	214500000	215000000	3	-0.0434481
2	332000000	332500000	5	1_2	217000000	217500000	3	-0.0434481
2	332500000	333000000	4	1_2	221500000	222000000	3	-0.0434481
2	333000000	333500000	3	1_2	222000000	222500000	3	-0.0434481
2	333500000	334000000	4	1_2	222500000	223000000	3	-0.0434481
2	334000000	334500000	2	1_2	224000000	224500000	3	-0.0434481
2	334500000	335000000	4	1_2	229500000	230000000	3	-0.0434481
2	335000000	335500000	3	1_2	230000000	230500000	3	-0.0434481
2	335500000	336000000	7	1_2	236500000	237000000	3	-0.0434481
2	336000000	336500000	4	1_2	240500000	241000000	3	-0.0434481
2	336500000	337000000	2	1_2	242500000	243000000	3	-0.0434481
2	337000000	337500000	4	1_2	245000000	245500000	3	-0.0434481
2	337500000	338000000	3	1_2	247500000	248000000	3	-0.0434481
2	338000000	338500000	2	1_2	249000000	249500000	3	-0.0434481
2	338500000	339000000	1	1_2	252500000	253000000	3	-0.0434481
2	339000000	339500000	4	1_2	253500000	254000000	3	-0.0434481
2	339500000	340000000	2	1_2	255000000	255500000	3	-0.0434481
2	340000000	340500000	4	1_2	258500000	259000000	3	-0.0434481
2	340500000	341000000	5	1_2	268000000	268500000	3	-0.0434481
2	341000000	341500000	4	1_2	268500000	269000000	3	-0.0434481
2	341500000	342000000	4	1_2	272000000	272500000	3	-0.0434481
2	342000000	342500000	4	1_2	274000000	274391693	3	-0.0434481
2	342500000	343000000	2	2	500000	1000000	3	-0.0434481
2	343000000	343500000	4	2	1000000	1500000	3	-0.0434481
2	343500000	344000000	5	2	1500000	2000000	3	-0.0434481
2	344000000	344500000	4	2	3500000	4000000	3	-0.0434481
2	344500000	345000000	2	2	11000000	11500000	3	-0.0434481
2	345000000	345500000	3	2	13000000	13500000	3	-0.0434481
2	345500000	346000000	2	2	18000000	18500000	3	-0.0434481
2	346000000	346500000	3	2	18500000	19000000	3	-0.0434481
2	346500000	347000000	4	2	23500000	24000000	3	-0.0434481
2	347000000	347500000	1	2	25000000	25500000	3	-0.0434481
2	347500000	348000000	1	2	25500000	26000000	3	-0.0434481
2	348000000	348500000	1	2	31000000	31500000	3	-0.0434481
2	348500000	349000000	1	2	32500000	33000000	3	-0.0434481
2	349000000	349500000	2	2	33000000	33500000	3	-0.0434481
2	349500000	350000000	2	2	40500000	41000000	3	-0.0434481
2	350000000	350500000	6	2	42000000	42500000	3	-0.0434481
2	350500000	351000000	0	2	42500000	43000000	3	-0.0434481
2	351000000	351500000	2	2	43500000	44000000	3	-0.0434481
2	351500000	352000000	1	2	45000000	45500000	3	-0.0434481
2	352000000	352500000	2	2	45500000	46000000	3	-0.0434481
2	352500000	353000000	3	2	47000000	47500000	3	-0.0434481
2	353000000	353500000	1	2	51000000	51500000	3	-0.0434481
2	353500000	354000000	3	2	52500000	53000000	3	-0.0434481
2	354000000	354500000	2	2	54000000	54500000	3	-0.0434481
2	354500000	355000000	5	2	55000000	55500000	3	-0.0434481
2	355000000	355500000	2	2	57000000	57500000	3	-0.0434481
2	355500000	356000000	4	2	59000000	59500000	3	-0.0434481
2	356000000	356500000	2	2	62000000	62500000	3	-0.0434481
2	356500000	357000000	5	2	63000000	63500000	3	-0.0434481
2	357000000	357500000	2	2	63500000	64000000	3	-0.0434481
2	357500000	358000000	2	2	64500000	65000000	3	-0.0434481
2	358000000	358500000	5	2	65000000	65500000	3	-0.0434481
2	358500000	359000000	3	2	65500000	66000000	3	-0.0434481
2	359000000	359500000	1	2	72000000	72500000	3	-0.0434481
2	359500000	360000000	2	2	72500000	73000000	3	-0.0434481
2	360000000	360500000	4	2	74000000	74500000	3	-0.0434481
2	360500000	361000000	1	2	79500000	80000000	3	-0.0434481
2	361000000	361500000	2	2	80000000	80500000	3	-0.0434481
2	361500000	362000000	3	2	83000000	83500000	3	-0.0434481
2	362000000	362500000	1	2	84000000	84500000	3	-0.0434481
2	362500000	363000000	6	2	87000000	87500000	3	-0.0434481
2	363000000	363500000	3	2	92500000	93000000	3	-0.0434481
2	363500000	364000000	1	2	94000000	94500000	3	-0.0434481
2	364000000	364500000	3	2	96500000	97000000	3	-0.0434481
2	364500000	365000000	4	2	99000000	99500000	3	-0.0434481
2	365000000	365500000	1	2	103000000	103500000	3	-0.0434481
2	365500000	366000000	2	2	104000000	104500000	3	-0.0434481
2	366000000	366500000	1	2	106500000	107000000	3	-0.0434481
2	366500000	367000000	3	2	108500000	109000000	3	-0.0434481
2	367000000	367500000	6	2	110500000	111000000	3	-0.0434481
2	367500000	368000000	1	2	111500000	112000000	3	-0.0434481
2	368000000	368500000	4	2	119000000	119500000	3	-0.0434481
2	368500000	369000000	3	2	121000000	121500000	3	-0.0434481
2	369000000	369500000	3	2	130500000	131000000	3	-0.0434481
2	369500000	370000000	3	2	132500000	133000000	3	-0.0434481
2	370000000	370500000	4	2	136000000	136500000	3	-0.0434481
2	370500000	371000000	6	2	137500000	138000000	3	-0.0434481
2	371000000	371500000	2	2	146000000	146500000	3	-0.0434481
2	371500000	372000000	3	2	146500000	147000000	3	-0.0434481
2	372000000	372500000	3	2	147500000	148000000	3	-0.0434481
2	372500000	373000000	2	2	151000000	151500000	3	-0.0434481
2	373000000	373500000	4	2	152000000	152500000	3	-0.0434481
2	373500000	374000000	0	2	163500000	164000000	3	-0.0434481
2	374000000	374500000	6	2	167500000	168000000	3	-0.0434481
2	374500000	375000000	0	2	170000000	170500000	3	-0.0434481
2	375000000	375500000	3	2	173000000	173500000	3	-0.0434481
2	375500000	376000000	1	2	178000000	178500000	3	-0.0434481
2	376000000	376500000	1	2	178500000	179000000	3	-0.0434481
2	376500000	377000000	2	2	180500000	181000000	3	-0.0434481
2	377000000	377500000	5	2	181500000	182000000	3	-0.0434481
2	377500000	378000000	1	2	182000000	182500000	3	-0.0434481
2	378000000	378500000	5	2	185500000	186000000	3	-0.0434481
2	378500000	379000000	2	2	186500000	187000000	3	-0.0434481
2	379000000	379500000	1	2	189500000	190000000	3	-0.0434481
2	379500000	380000000	2	2	191000000	191500000	3	-0.0434481
2	380000000	380500000	0	2	194500000	195000000	3	-0.0434481
2	380500000	381000000	1	2	197000000	197500000	3	-0.0434481
2	381000000	381500000	2	2	208000000	208500000	3	-0.0434481
2	381500000	382000000	3	2	222500000	223000000	3	-0.0434481
2	382000000	382500000	1	2	226000000	226500000	3	-0.0434481
2	382500000	383000000	0	2	228500000	229000000	3	-0.0434481
2	383000000	383500000	2	2	233000000	233500000	3	-0.0434481
2	383500000	384000000	0	2	234000000	234500000	3	-0.0434481
2	384000000	384500000	0	2	235000000	235500000	3	-0.0434481
2	384500000	385000000	7	2	235500000	236000000	3	-0.0434481
2	385000000	385500000	1	2	236000000	236500000	3	-0.0434481
2	385500000	386000000	0	2	238000000	238500000	3	-0.0434481
2	386000000	386500000	2	2	240500000	241000000	3	-0.0434481
2	386500000	387000000	2	2	241500000	242000000	3	-0.0434481
2	387000000	387500000	3	2	243000000	243500000	3	-0.0434481
2	387500000	388000000	4	2	244000000	244500000	3	-0.0434481
2	388000000	388500000	5	2	247000000	247500000	3	-0.0434481
2	388500000	389000000	2	2	248000000	248500000	3	-0.0434481
2	389000000	389500000	3	2	248500000	249000000	3	-0.0434481
2	389500000	390000000	1	2	252000000	252500000	3	-0.0434481
2	390000000	390500000	2	2	253000000	253500000	3	-0.0434481
2	390500000	391000000	4	2	254500000	255000000	3	-0.0434481
2	391000000	391500000	1	2	256500000	257000000	3	-0.0434481
2	391500000	392000000	2	2	257500000	258000000	3	-0.0434481
2	392000000	392500000	6	2	260500000	261000000	3	-0.0434481
2	392500000	393000000	1	2	261000000	261500000	3	-0.0434481
2	393000000	393500000	1	2	263000000	263500000	3	-0.0434481
2	393500000	394000000	4	2	267500000	268000000	3	-0.0434481
2	394000000	394500000	4	2	268500000	269000000	3	-0.0434481
2	394500000	395000000	4	2	272000000	272500000	3	-0.0434481
2	395000000	395500000	1	2	275500000	276000000	3	-0.0434481
2	395500000	396000000	0	2	279000000	279500000	3	-0.0434481
2	396000000	396500000	4	2	284500000	285000000	3	-0.0434481
2	396500000	397000000	2	2	285000000	285500000	3	-0.0434481
2	397000000	397500000	5	2	285500000	286000000	3	-0.0434481
2	397500000	398000000	2	2	287000000	287500000	3	-0.0434481
2	398000000	398500000	1	2	290000000	290500000	3	-0.0434481
2	398500000	399000000	1	2	294500000	295000000	3	-0.0434481
2	399000000	399500000	1	2	295000000	295500000	3	-0.0434481
2	399500000	400000000	6	2	299500000	300000000	3	-0.0434481
2	400000000	400500000	3	2	302000000	302500000	3	-0.0434481
2	400500000	401000000	1	2	303500000	304000000	3	-0.0434481
2	401000000	401500000	1	2	318500000	319000000	3	-0.0434481
2	401500000	402000000	0	2	320000000	320500000	3	-0.0434481
2	402000000	402500000	6	2	329500000	330000000	3	-0.0434481
2	402500000	403000000	1	2	331500000	332000000	3	-0.0434481
2	403000000	403500000	1	2	333000000	333500000	3	-0.0434481
2	403500000	404000000	1	2	335000000	335500000	3	-0.0434481
2	404000000	404500000	5	2	337500000	338000000	3	-0.0434481
2	404500000	405000000	2	2	345000000	345500000	3	-0.0434481
2	405000000	405500000	7	2	346000000	346500000	3	-0.0434481
2	405500000	406000000	1	2	352500000	353000000	3	-0.0434481
2	406000000	406500000	2	2	353500000	354000000	3	-0.0434481
2	406500000	407000000	1	2	358500000	359000000	3	-0.0434481
2	407000000	407500000	2	2	361500000	362000000	3	-0.0434481
2	407500000	408000000	2	2	363000000	363500000	3	-0.0434481
2	408000000	408500000	1	2	364000000	364500000	3	-0.0434481
2	408500000	409000000	4	2	366500000	367000000	3	-0.0434481
2	409000000	409500000	0	2	368500000	369000000	3	-0.0434481
2	409500000	410000000	2	2	369000000	369500000	3	-0.0434481
2	410000000	410500000	6	2	369500000	370000000	3	-0.0434481
2	410500000	411000000	1	2	371500000	372000000	3	-0.0434481
2	411000000	411500000	4	2	372000000	372500000	3	-0.0434481
2	411500000	412000000	2	2	375000000	375500000	3	-0.0434481
2	412000000	412500000	1	2	381500000	382000000	3	-0.0434481
2	412500000	413000000	0	2	387000000	387500000	3	-0.0434481
2	413000000	413500000	2	2	389000000	389500000	3	-0.0434481
2	413500000	414000000	4	2	400000000	400500000	3	-0.0434481
2	414000000	414500000	1	2	421500000	422000000	3	-0.0434481
2	414500000	415000000	1	2	427500000	428000000	3	-0.0434481
2	415000000	415500000	2	2	428000000	428500000	3	-0.0434481
2	415500000	416000000	2	2	430500000	431000000	3	-0.0434481
2	416000000	416500000	1	2	435500000	436000000	3	-0.0434481
2	416500000	417000000	0	2	436000000	436500000	3	-0.0434481
2	417000000	417500000	4	2	446000000	446500000	3	-0.0434481
2	417500000	418000000	1	2	447500000	448000000	3	-0.0434481
2	418000000	418500000	0	2	449000000	449500000	3	-0.0434481
2	418500000	419000000	5	2	451000000	451500000	3	-0.0434481
2	419000000	419500000	1	2	452000000	452500000	3	-0.0434481
2	419500000	420000000	1	2	453500000	454000000	3	-0.0434481
2	420000000	420500000	2	2	455000000	455500000	3	-0.0434481
2	420500000	421000000	2	2	456500000	457000000	3	-0.0434481
2	421000000	421500000	5	3	3000000	3500000	3	-0.0434481
2	421500000	422000000	3	3	3500000	4000000	3	-0.0434481
2	422000000	422500000	1	3	4000000	4500000	3	-0.0434481
2	422500000	423000000	4	3	5000000	5500000	3	-0.0434481
2	423000000	423500000	5	3	12500000	13000000	3	-0.0434481
2	423500000	424000000	4	3	16000000	16500000	3	-0.0434481
2	424000000	424500000	1	3	17000000	17500000	3	-0.0434481
2	424500000	425000000	2	3	18500000	19000000	3	-0.0434481
2	425000000	425500000	2	3	19000000	19500000	3	-0.0434481
2	425500000	426000000	1	3	21500000	22000000	3	-0.0434481
2	426000000	426500000	1	3	22500000	23000000	3	-0.0434481
2	426500000	427000000	4	3	34500000	35000000	3	-0.0434481
2	427000000	427500000	2	3	35000000	35500000	3	-0.0434481
2	427500000	428000000	3	3	35500000	36000000	3	-0.0434481
2	428000000	428500000	3	3	39000000	39500000	3	-0.0434481
2	428500000	429000000	6	3	46000000	46500000	3	-0.0434481
2	429000000	429500000	1	3	48000000	48500000	3	-0.0434481
2	429500000	430000000	4	3	52000000	52500000	3	-0.0434481
2	430000000	430500000	1	3	52500000	53000000	3	-0.0434481
2	430500000	431000000	3	3	55500000	56000000	3	-0.0434481
2	431000000	431500000	2	3	57500000	58000000	3	-0.0434481
2	431500000	432000000	5	3	58000000	58500000	3	-0.0434481
2	432000000	432500000	0	3	58500000	59000000	3	-0.0434481
2	432500000	433000000	1	3	63000000	63500000	3	-0.0434481
2	433000000	433500000	4	3	64000000	64500000	3	-0.0434481
2	433500000	434000000	2	3	67000000	67500000	3	-0.0434481
2	434000000	434500000	2	3	69000000	69500000	3	-0.0434481
2	434500000	435000000	6	3	71500000	72000000	3	-0.0434481
2	435000000	435500000	7	3	73500000	74000000	3	-0.0434481
2	435500000	436000000	3	3	79500000	80000000	3	-0.0434481
2	436000000	436500000	3	3	81000000	81500000	3	-0.0434481
2	436500000	437000000	4	3	86000000	86500000	3	-0.0434481
2	437000000	437500000	1	3	87500000	88000000	3	-0.0434481
2	437500000	438000000	1	3	88500000	89000000	3	-0.0434481
2	438000000	438500000	4	3	90000000	90500000	3	-0.0434481
2	438500000	439000000	0	3	92000000	92500000	3	-0.0434481
2	439000000	439500000	5	3	93500000	94000000	3	-0.0434481
2	439500000	440000000	0	3	95000000	95500000	3	-0.0434481
2	440000000	440500000	5	3	96500000	97000000	3	-0.0434481
2	440500000	441000000	9	3	100000000	100500000	3	-0.0434481
2	441000000	441500000	2	3	103500000	104000000	3	-0.0434481
2	441500000	442000000	0	3	106000000	106500000	3	-0.0434481
2	442000000	442500000	4	3	106500000	107000000	3	-0.0434481
2	442500000	443000000	5	3	110500000	111000000	3	-0.0434481
2	443000000	443500000	5	3	115000000	115500000	3	-0.0434481
2	443500000	444000000	7	3	116000000	116500000	3	-0.0434481
2	444000000	444500000	4	3	117000000	117500000	3	-0.0434481
2	444500000	445000000	2	3	120500000	121000000	3	-0.0434481
2	445000000	445500000	2	3	122500000	123000000	3	-0.0434481
2	445500000	446000000	5	3	124000000	124500000	3	-0.0434481
2	446000000	446500000	3	3	134000000	134500000	3	-0.0434481
2	446500000	447000000	1	3	136000000	136500000	3	-0.0434481
2	447000000	447500000	2	3	140500000	141000000	3	-0.0434481
2	447500000	448000000	3	3	141500000	142000000	3	-0.0434481
[truncated: 2,605 more rows]

## Sheet: S17
Table S17: Lactate-stressed Day 12 biogenesis frequencies. Full details of eccDNA biogenesis frequencies shown chronologically (left) and ranked (right).
Chronological				Ranked
Chr	Start	Stop	Frequency	Chr	Start	Stop	Frequency	Z Score
1_1	0	500000	3	9	14500000	15000000	48	0.607143
1_1	500000	1000000	0	9	15500000	16000000	37	0.214286
1_1	1000000	1500000	2	9	15000000	15500000	31	0
1_1	1500000	2000000	4	7	134000000	134359064	28	-0.107143
1_1	2000000	2500000	1	10	25500000	26000000	27	-0.142857
1_1	2500000	3000000	1	9	14000000	14500000	26	-0.178571
1_1	3000000	3500000	0	9	13500000	14000000	22	-0.321429
1_1	3500000	4000000	4	10	23500000	24000000	20	-0.392857
1_1	4000000	4500000	6	X	106500000	107000000	18	-0.464286
1_1	4500000	5000000	1	2	41000000	41500000	16	-0.535714
1_1	5000000	5500000	0	7	106000000	106500000	16	-0.535714
1_1	5500000	6000000	0	9	16000000	16500000	16	-0.535714
1_1	6000000	6500000	5	3	23500000	24000000	15	-0.571429
1_1	6500000	7000000	1	10	21000000	21500000	14	-0.607143
1_1	7000000	7500000	2	10	24000000	24500000	14	-0.607143
1_1	7500000	8000000	1	2	34500000	35000000	14	-0.607143
1_1	8000000	8500000	3	10	23000000	23500000	13	-0.642857
1_1	8500000	9000000	1	3	235500000	236000000	13	-0.642857
1_1	9000000	9500000	2	1_2	32000000	32500000	12	-0.678571
1_1	9500000	10000000	0	1_2	61500000	62000000	12	-0.678571
1_1	10000000	10500000	3	6	114000000	114500000	12	-0.678571
1_1	10500000	11000000	2	9	17500000	18000000	12	-0.678571
1_1	11000000	11500000	2	1_2	195000000	195500000	11	-0.714286
1_1	11500000	12000000	3	1_2	196000000	196500000	11	-0.714286
1_1	12000000	12500000	4	2	317500000	318000000	11	-0.714286
1_1	12500000	13000000	2	3	252000000	252500000	11	-0.714286
1_1	13000000	13500000	3	10	22000000	22500000	10	-0.75
1_1	13500000	14000000	1	10	25000000	25500000	10	-0.75
1_1	14000000	14500000	4	1_1	120000000	120500000	10	-0.75
1_1	14500000	15000000	4	2	249000000	249500000	10	-0.75
1_1	15000000	15500000	2	2	375500000	376000000	10	-0.75
1_1	15500000	16000000	3	3	27000000	27500000	10	-0.75
1_1	16000000	16500000	2	3	42500000	43000000	10	-0.75
1_1	16500000	17000000	4	3	121000000	121500000	10	-0.75
1_1	17000000	17500000	0	3	154000000	154500000	10	-0.75
1_1	17500000	18000000	4	3	195000000	195500000	10	-0.75
1_1	18000000	18500000	2	4	7000000	7500000	10	-0.75
1_1	18500000	19000000	3	9	12500000	13000000	10	-0.75
1_1	19000000	19500000	3	9	25500000	26000000	10	-0.75
1_1	19500000	20000000	3	10	19000000	19500000	9	-0.785714
1_1	20000000	20500000	1	1_1	151000000	151500000	9	-0.785714
1_1	20500000	21000000	1	1_1	202000000	202500000	9	-0.785714
1_1	21000000	21500000	1	1_1	239500000	240000000	9	-0.785714
1_1	21500000	22000000	3	1_2	77500000	78000000	9	-0.785714
1_1	22000000	22500000	1	2	7500000	8000000	9	-0.785714
1_1	22500000	23000000	0	2	36000000	36500000	9	-0.785714
1_1	23000000	23500000	2	2	361500000	362000000	9	-0.785714
1_1	23500000	24000000	0	2	410500000	411000000	9	-0.785714
1_1	24000000	24500000	0	2	439500000	440000000	9	-0.785714
1_1	24500000	25000000	2	2	443500000	444000000	9	-0.785714
1_1	25000000	25500000	2	2	448500000	449000000	9	-0.785714
1_1	25500000	26000000	4	3	39000000	39500000	9	-0.785714
1_1	26000000	26500000	0	3	43500000	44000000	9	-0.785714
1_1	26500000	27000000	1	3	66500000	67000000	9	-0.785714
1_1	27000000	27500000	3	3	94500000	95000000	9	-0.785714
1_1	27500000	28000000	3	3	99500000	100000000	9	-0.785714
1_1	28000000	28500000	4	3	119500000	120000000	9	-0.785714
1_1	28500000	29000000	3	3	131000000	131500000	9	-0.785714
1_1	29000000	29500000	0	3	144500000	145000000	9	-0.785714
1_1	29500000	30000000	3	3	201500000	202000000	9	-0.785714
1_1	30000000	30500000	3	4	2500000	3000000	9	-0.785714
1_1	30500000	31000000	1	4	96500000	97000000	9	-0.785714
1_1	31000000	31500000	4	4	149500000	150000000	9	-0.785714
1_1	31500000	32000000	5	4	221000000	221500000	9	-0.785714
1_1	32000000	32500000	0	5	63500000	64000000	9	-0.785714
1_1	32500000	33000000	0	5	113500000	114000000	9	-0.785714
1_1	33000000	33500000	0	5	118500000	119000000	9	-0.785714
1_1	33500000	34000000	1	6	16000000	16500000	9	-0.785714
1_1	34000000	34500000	0	6	19000000	19500000	9	-0.785714
1_1	34500000	35000000	2	6	33500000	34000000	9	-0.785714
1_1	35000000	35500000	2	6	145000000	145500000	9	-0.785714
1_1	35500000	36000000	1	8	40000000	40500000	9	-0.785714
1_1	36000000	36500000	1	8	74500000	75000000	9	-0.785714
1_1	36500000	37000000	8	8	78500000	79000000	9	-0.785714
1_1	37000000	37500000	3	8	83000000	83500000	9	-0.785714
1_1	37500000	38000000	1	8	85000000	85500000	9	-0.785714
1_1	38000000	38500000	5	10	18500000	19000000	8	-0.821429
1_1	38500000	39000000	3	10	22500000	23000000	8	-0.821429
1_1	39000000	39500000	1	1_1	36500000	37000000	8	-0.821429
1_1	39500000	40000000	0	1_1	92500000	93000000	8	-0.821429
1_1	40000000	40500000	1	1_1	119000000	119500000	8	-0.821429
1_1	40500000	41000000	3	1_1	136500000	137000000	8	-0.821429
1_1	41000000	41500000	6	1_1	242000000	242500000	8	-0.821429
1_1	41500000	42000000	1	1_1	261500000	262000000	8	-0.821429
1_1	42000000	42500000	0	1_2	30000000	30500000	8	-0.821429
1_1	42500000	43000000	4	1_2	158000000	158500000	8	-0.821429
1_1	43000000	43500000	1	1_2	218000000	218500000	8	-0.821429
1_1	43500000	44000000	1	2	2000000	2500000	8	-0.821429
1_1	44000000	44500000	3	2	5500000	6000000	8	-0.821429
1_1	44500000	45000000	1	2	12000000	12500000	8	-0.821429
1_1	45000000	45500000	0	2	255500000	256000000	8	-0.821429
1_1	45500000	46000000	2	2	274500000	275000000	8	-0.821429
1_1	46000000	46500000	2	2	319000000	319500000	8	-0.821429
1_1	46500000	47000000	3	2	327500000	328000000	8	-0.821429
1_1	47000000	47500000	2	2	456000000	456500000	8	-0.821429
1_1	47500000	48000000	0	3	3000000	3500000	8	-0.821429
1_1	48000000	48500000	1	3	32000000	32500000	8	-0.821429
1_1	48500000	49000000	1	3	36500000	37000000	8	-0.821429
1_1	49000000	49500000	1	3	42000000	42500000	8	-0.821429
1_1	49500000	50000000	3	3	80500000	81000000	8	-0.821429
1_1	50000000	50500000	1	3	81500000	82000000	8	-0.821429
1_1	50500000	51000000	1	3	86000000	86500000	8	-0.821429
1_1	51000000	51500000	0	3	120500000	121000000	8	-0.821429
1_1	51500000	52000000	2	3	122500000	123000000	8	-0.821429
1_1	52000000	52500000	1	3	135000000	135500000	8	-0.821429
1_1	52500000	53000000	2	3	164500000	165000000	8	-0.821429
1_1	53000000	53500000	1	3	199500000	200000000	8	-0.821429
1_1	53500000	54000000	2	4	21500000	22000000	8	-0.821429
1_1	54000000	54500000	1	4	33500000	34000000	8	-0.821429
1_1	54500000	55000000	2	4	158000000	158500000	8	-0.821429
1_1	55000000	55500000	0	4	165500000	166000000	8	-0.821429
1_1	55500000	56000000	1	4	179000000	179500000	8	-0.821429
1_1	56000000	56500000	4	4	215000000	215500000	8	-0.821429
1_1	56500000	57000000	1	5	8500000	9000000	8	-0.821429
1_1	57000000	57500000	3	5	120000000	120500000	8	-0.821429
1_1	57500000	58000000	3	5	185500000	186000000	8	-0.821429
1_1	58000000	58500000	0	6	7000000	7500000	8	-0.821429
1_1	58500000	59000000	4	6	93000000	93500000	8	-0.821429
1_1	59000000	59500000	2	6	106000000	106500000	8	-0.821429
1_1	59500000	60000000	0	7	82500000	83000000	8	-0.821429
1_1	60000000	60500000	0	7	89500000	90000000	8	-0.821429
1_1	60500000	61000000	1	7	90000000	90500000	8	-0.821429
1_1	61000000	61500000	2	7	127000000	127500000	8	-0.821429
1_1	61500000	62000000	1	8	59000000	59500000	8	-0.821429
1_1	62000000	62500000	2	9	17000000	17500000	8	-0.821429
1_1	62500000	63000000	0	10	8500000	9000000	7	-0.857143
1_1	63000000	63500000	2	10	24500000	25000000	7	-0.857143
1_1	63500000	64000000	4	10	26000000	26500000	7	-0.857143
1_1	64000000	64500000	2	1_1	190000000	190500000	7	-0.857143
1_1	64500000	65000000	0	1_1	193500000	194000000	7	-0.857143
1_1	65000000	65500000	1	1_1	196500000	197000000	7	-0.857143
1_1	65500000	66000000	2	1_1	220500000	221000000	7	-0.857143
1_1	66000000	66500000	0	1_1	228000000	228500000	7	-0.857143
1_1	66500000	67000000	1	1_1	251500000	252000000	7	-0.857143
1_1	67000000	67500000	1	1_2	26000000	26500000	7	-0.857143
1_1	67500000	68000000	1	1_2	31000000	31500000	7	-0.857143
1_1	68000000	68500000	1	1_2	65500000	66000000	7	-0.857143
1_1	68500000	69000000	4	1_2	72500000	73000000	7	-0.857143
1_1	69000000	69500000	0	1_2	186500000	187000000	7	-0.857143
1_1	69500000	70000000	2	1_2	209500000	210000000	7	-0.857143
1_1	70000000	70500000	0	1_2	221000000	221500000	7	-0.857143
1_1	70500000	71000000	1	2	18500000	19000000	7	-0.857143
1_1	71000000	71500000	0	2	79500000	80000000	7	-0.857143
1_1	71500000	72000000	0	2	106500000	107000000	7	-0.857143
1_1	72000000	72500000	1	2	171000000	171500000	7	-0.857143
1_1	72500000	73000000	1	2	233000000	233500000	7	-0.857143
1_1	73000000	73500000	0	2	244000000	244500000	7	-0.857143
1_1	73500000	74000000	3	2	282500000	283000000	7	-0.857143
1_1	74000000	74500000	2	2	340500000	341000000	7	-0.857143
1_1	74500000	75000000	5	2	404500000	405000000	7	-0.857143
1_1	75000000	75500000	0	3	45000000	45500000	7	-0.857143
1_1	75500000	76000000	0	3	48500000	49000000	7	-0.857143
1_1	76000000	76500000	3	3	53500000	54000000	7	-0.857143
1_1	76500000	77000000	1	3	89000000	89500000	7	-0.857143
1_1	77000000	77500000	1	3	94000000	94500000	7	-0.857143
1_1	77500000	78000000	4	3	115500000	116000000	7	-0.857143
1_1	78000000	78500000	0	3	116500000	117000000	7	-0.857143
1_1	78500000	79000000	3	3	127000000	127500000	7	-0.857143
1_1	79000000	79500000	1	3	140000000	140500000	7	-0.857143
1_1	79500000	80000000	3	3	143500000	144000000	7	-0.857143
1_1	80000000	80500000	0	3	147500000	148000000	7	-0.857143
1_1	80500000	81000000	0	3	152000000	152500000	7	-0.857143
1_1	81000000	81500000	1	3	171000000	171500000	7	-0.857143
1_1	81500000	82000000	3	3	181000000	181500000	7	-0.857143
1_1	82000000	82500000	2	3	187000000	187500000	7	-0.857143
1_1	82500000	83000000	2	3	197500000	198000000	7	-0.857143
1_1	83000000	83500000	1	3	265500000	266000000	7	-0.857143
1_1	83500000	84000000	1	4	1000000	1500000	7	-0.857143
1_1	84000000	84500000	1	4	17500000	18000000	7	-0.857143
1_1	84500000	85000000	1	4	52500000	53000000	7	-0.857143
1_1	85000000	85500000	0	4	72500000	73000000	7	-0.857143
1_1	85500000	86000000	2	4	97500000	98000000	7	-0.857143
1_1	86000000	86500000	0	4	127500000	128000000	7	-0.857143
1_1	86500000	87000000	1	4	131500000	132000000	7	-0.857143
1_1	87000000	87500000	0	4	138000000	138500000	7	-0.857143
1_1	87500000	88000000	0	4	163000000	163500000	7	-0.857143
1_1	88000000	88500000	2	4	201000000	201500000	7	-0.857143
1_1	88500000	89000000	1	4	229500000	230000000	7	-0.857143
1_1	89000000	89500000	3	5	15000000	15500000	7	-0.857143
1_1	89500000	90000000	6	5	19000000	19500000	7	-0.857143
1_1	90000000	90500000	2	5	27500000	28000000	7	-0.857143
1_1	90500000	91000000	3	5	48000000	48500000	7	-0.857143
1_1	91000000	91500000	1	5	54500000	55000000	7	-0.857143
1_1	91500000	92000000	0	5	60000000	60500000	7	-0.857143
1_1	92000000	92500000	1	5	60500000	61000000	7	-0.857143
1_1	92500000	93000000	8	5	119000000	119500000	7	-0.857143
1_1	93000000	93500000	6	5	159000000	159500000	7	-0.857143
1_1	93500000	94000000	6	5	192500000	193000000	7	-0.857143
1_1	94000000	94500000	3	6	0	500000	7	-0.857143
1_1	94500000	95000000	6	6	1500000	2000000	7	-0.857143
1_1	95000000	95500000	0	6	3500000	4000000	7	-0.857143
1_1	95500000	96000000	0	6	12000000	12500000	7	-0.857143
1_1	96000000	96500000	0	6	75000000	75500000	7	-0.857143
1_1	96500000	97000000	1	6	103000000	103500000	7	-0.857143
1_1	97000000	97500000	0	6	136000000	136500000	7	-0.857143
1_1	97500000	98000000	1	6	145500000	146000000	7	-0.857143
1_1	98000000	98500000	1	7	49000000	49500000	7	-0.857143
1_1	98500000	99000000	0	7	103500000	104000000	7	-0.857143
1_1	99000000	99500000	0	7	113000000	113500000	7	-0.857143
1_1	99500000	100000000	2	7	116500000	117000000	7	-0.857143
1_1	100000000	100500000	4	8	60500000	61000000	7	-0.857143
1_1	100500000	101000000	1	8	87500000	88000000	7	-0.857143
1_1	101000000	101500000	1	9	13000000	13500000	7	-0.857143
1_1	101500000	102000000	3	10	18000000	18500000	6	-0.892857
1_1	102000000	102500000	2	10	20000000	20500000	6	-0.892857
1_1	102500000	103000000	0	10	21500000	22000000	6	-0.892857
1_1	103000000	103500000	2	1_1	4000000	4500000	6	-0.892857
1_1	103500000	104000000	2	1_1	41000000	41500000	6	-0.892857
1_1	104000000	104500000	1	1_1	89500000	90000000	6	-0.892857
1_1	104500000	105000000	0	1_1	93000000	93500000	6	-0.892857
1_1	105000000	105500000	2	1_1	93500000	94000000	6	-0.892857
1_1	105500000	106000000	4	1_1	94500000	95000000	6	-0.892857
1_1	106000000	106500000	1	1_1	121000000	121500000	6	-0.892857
1_1	106500000	107000000	3	1_1	121500000	122000000	6	-0.892857
1_1	107000000	107500000	2	1_1	123000000	123500000	6	-0.892857
1_1	107500000	108000000	3	1_1	153000000	153500000	6	-0.892857
1_1	108000000	108500000	1	1_1	184500000	185000000	6	-0.892857
1_1	108500000	109000000	1	1_1	191000000	191500000	6	-0.892857
1_1	109000000	109500000	1	1_1	204000000	204500000	6	-0.892857
1_1	109500000	110000000	1	1_1	216500000	217000000	6	-0.892857
1_1	110000000	110500000	1	1_1	223000000	223500000	6	-0.892857
1_1	110500000	111000000	1	1_1	238000000	238500000	6	-0.892857
1_1	111000000	111500000	1	1_1	253000000	253500000	6	-0.892857
1_1	111500000	112000000	0	1_1	265000000	265500000	6	-0.892857
1_1	112000000	112500000	2	1_1	266000000	266500000	6	-0.892857
1_1	112500000	113000000	4	1_1	269500000	270000000	6	-0.892857
1_1	113000000	113500000	1	1_1	275000000	275500000	6	-0.892857
1_1	113500000	114000000	2	1_2	3000000	3500000	6	-0.892857
1_1	114000000	114500000	1	1_2	4000000	4500000	6	-0.892857
1_1	114500000	115000000	2	1_2	16500000	17000000	6	-0.892857
1_1	115000000	115500000	0	1_2	30500000	31000000	6	-0.892857
1_1	115500000	116000000	3	1_2	38500000	39000000	6	-0.892857
1_1	116000000	116500000	2	1_2	47000000	47500000	6	-0.892857
1_1	116500000	117000000	0	1_2	60000000	60500000	6	-0.892857
1_1	117000000	117500000	2	1_2	76000000	76500000	6	-0.892857
1_1	117500000	118000000	4	1_2	76500000	77000000	6	-0.892857
1_1	118000000	118500000	0	1_2	90500000	91000000	6	-0.892857
1_1	118500000	119000000	1	1_2	93500000	94000000	6	-0.892857
1_1	119000000	119500000	8	1_2	94000000	94500000	6	-0.892857
1_1	119500000	120000000	5	1_2	100000000	100500000	6	-0.892857
1_1	120000000	120500000	10	1_2	195500000	196000000	6	-0.892857
1_1	120500000	121000000	4	1_2	223500000	224000000	6	-0.892857
1_1	121000000	121500000	6	1_2	224500000	225000000	6	-0.892857
1_1	121500000	122000000	6	1_2	227500000	228000000	6	-0.892857
1_1	122000000	122500000	0	1_2	246500000	247000000	6	-0.892857
1_1	122500000	123000000	0	1_2	265500000	266000000	6	-0.892857
1_1	123000000	123500000	6	2	9000000	9500000	6	-0.892857
1_1	123500000	124000000	1	2	37500000	38000000	6	-0.892857
1_1	124000000	124500000	0	2	64000000	64500000	6	-0.892857
1_1	124500000	125000000	0	2	99500000	100000000	6	-0.892857
1_1	125000000	125500000	1	2	123000000	123500000	6	-0.892857
1_1	125500000	126000000	3	2	196000000	196500000	6	-0.892857
1_1	126000000	126500000	5	2	225000000	225500000	6	-0.892857
1_1	126500000	127000000	3	2	232500000	233000000	6	-0.892857
1_1	127000000	127500000	1	2	298500000	299000000	6	-0.892857
1_1	127500000	128000000	1	2	318500000	319000000	6	-0.892857
1_1	128000000	128500000	0	2	325000000	325500000	6	-0.892857
1_1	128500000	129000000	3	2	339000000	339500000	6	-0.892857
1_1	129000000	129500000	2	2	377500000	378000000	6	-0.892857
1_1	129500000	130000000	1	2	400000000	400500000	6	-0.892857
1_1	130000000	130500000	1	2	434000000	434500000	6	-0.892857
1_1	130500000	131000000	1	3	12500000	13000000	6	-0.892857
1_1	131000000	131500000	2	3	20500000	21000000	6	-0.892857
1_1	131500000	132000000	2	3	26000000	26500000	6	-0.892857
1_1	132000000	132500000	1	3	31500000	32000000	6	-0.892857
1_1	132500000	133000000	1	3	32500000	33000000	6	-0.892857
1_1	133000000	133500000	2	3	41000000	41500000	6	-0.892857
1_1	133500000	134000000	2	3	44500000	45000000	6	-0.892857
1_1	134000000	134500000	4	3	45500000	46000000	6	-0.892857
1_1	134500000	135000000	2	3	48000000	48500000	6	-0.892857
1_1	135000000	135500000	3	3	70500000	71000000	6	-0.892857
1_1	135500000	136000000	2	3	83500000	84000000	6	-0.892857
1_1	136000000	136500000	1	3	90500000	91000000	6	-0.892857
1_1	136500000	137000000	8	3	96500000	97000000	6	-0.892857
1_1	137000000	137500000	3	3	98500000	99000000	6	-0.892857
1_1	137500000	138000000	2	3	110000000	110500000	6	-0.892857
1_1	138000000	138500000	1	3	118000000	118500000	6	-0.892857
1_1	138500000	139000000	4	3	122000000	122500000	6	-0.892857
1_1	139000000	139500000	0	3	126000000	126500000	6	-0.892857
1_1	139500000	140000000	2	3	133000000	133500000	6	-0.892857
1_1	140000000	140500000	1	3	133500000	134000000	6	-0.892857
1_1	140500000	141000000	3	3	141000000	141500000	6	-0.892857
1_1	141000000	141500000	4	3	146500000	147000000	6	-0.892857
1_1	141500000	142000000	0	3	161500000	162000000	6	-0.892857
1_1	142000000	142500000	1	3	165000000	165500000	6	-0.892857
1_1	142500000	143000000	0	3	173000000	173500000	6	-0.892857
1_1	143000000	143500000	0	3	185500000	186000000	6	-0.892857
1_1	143500000	144000000	3	3	202500000	203000000	6	-0.892857
1_1	144000000	144500000	0	3	214000000	214500000	6	-0.892857
1_1	144500000	145000000	1	3	226000000	226500000	6	-0.892857
1_1	145000000	145500000	0	3	230000000	230500000	6	-0.892857
1_1	145500000	146000000	1	3	252500000	253000000	6	-0.892857
1_1	146000000	146500000	2	4	43000000	43500000	6	-0.892857
1_1	146500000	147000000	1	4	50500000	51000000	6	-0.892857
1_1	147000000	147500000	2	4	58000000	58500000	6	-0.892857
1_1	147500000	148000000	4	4	60500000	61000000	6	-0.892857
1_1	148000000	148500000	1	4	82500000	83000000	6	-0.892857
1_1	148500000	149000000	1	4	85000000	85500000	6	-0.892857
1_1	149000000	149500000	1	4	105500000	106000000	6	-0.892857
1_1	149500000	150000000	1	4	117500000	118000000	6	-0.892857
1_1	150000000	150500000	2	4	131000000	131500000	6	-0.892857
1_1	150500000	151000000	1	4	135000000	135500000	6	-0.892857
1_1	151000000	151500000	9	4	143000000	143500000	6	-0.892857
1_1	151500000	152000000	1	4	152500000	153000000	6	-0.892857
1_1	152000000	152500000	5	4	171500000	172000000	6	-0.892857
1_1	152500000	153000000	3	4	214000000	214500000	6	-0.892857
1_1	153000000	153500000	6	4	221500000	222000000	6	-0.892857
1_1	153500000	154000000	3	4	224500000	225000000	6	-0.892857
1_1	154000000	154500000	2	4	227000000	227500000	6	-0.892857
1_1	154500000	155000000	1	5	1500000	2000000	6	-0.892857
1_1	155000000	155500000	1	5	6000000	6500000	6	-0.892857
1_1	155500000	156000000	2	5	11500000	12000000	6	-0.892857
1_1	156000000	156500000	5	5	15500000	16000000	6	-0.892857
1_1	156500000	157000000	3	5	36000000	36500000	6	-0.892857
1_1	157000000	157500000	0	5	37000000	37500000	6	-0.892857
1_1	157500000	158000000	2	5	51000000	51500000	6	-0.892857
1_1	158000000	158500000	1	5	56500000	57000000	6	-0.892857
1_1	158500000	159000000	1	5	57500000	58000000	6	-0.892857
1_1	159000000	159500000	2	5	58500000	59000000	6	-0.892857
1_1	159500000	160000000	3	5	64500000	65000000	6	-0.892857
1_1	160000000	160500000	2	5	65000000	65500000	6	-0.892857
1_1	160500000	161000000	1	5	81000000	81500000	6	-0.892857
1_1	161000000	161500000	2	5	92000000	92500000	6	-0.892857
1_1	161500000	162000000	3	5	107000000	107500000	6	-0.892857
1_1	162000000	162500000	5	5	107500000	108000000	6	-0.892857
1_1	162500000	163000000	2	5	111000000	111500000	6	-0.892857
1_1	163000000	163500000	2	5	141500000	142000000	6	-0.892857
1_1	163500000	164000000	3	5	147500000	148000000	6	-0.892857
1_1	164000000	164500000	3	5	162500000	163000000	6	-0.892857
1_1	164500000	165000000	0	6	21500000	22000000	6	-0.892857
1_1	165000000	165500000	0	6	24500000	25000000	6	-0.892857
1_1	165500000	166000000	3	6	30500000	31000000	6	-0.892857
1_1	166000000	166500000	1	6	38500000	39000000	6	-0.892857
1_1	166500000	167000000	2	6	47000000	47500000	6	-0.892857
1_1	167000000	167500000	5	6	50000000	50500000	6	-0.892857
1_1	167500000	168000000	1	6	52500000	53000000	6	-0.892857
1_1	168000000	168500000	0	6	102000000	102500000	6	-0.892857
1_1	168500000	169000000	2	6	106500000	107000000	6	-0.892857
1_1	169000000	169500000	2	6	149000000	149500000	6	-0.892857
1_1	169500000	170000000	3	6	152000000	152500000	6	-0.892857
1_1	170000000	170500000	1	6	153000000	153500000	6	-0.892857
1_1	170500000	171000000	1	7	14500000	15000000	6	-0.892857
1_1	171000000	171500000	1	7	23000000	23500000	6	-0.892857
1_1	171500000	172000000	1	7	26500000	27000000	6	-0.892857
1_1	172000000	172500000	0	7	43500000	44000000	6	-0.892857
1_1	172500000	173000000	0	7	71000000	71500000	6	-0.892857
1_1	173000000	173500000	1	7	90500000	91000000	6	-0.892857
1_1	173500000	174000000	0	7	93000000	93500000	6	-0.892857
1_1	174000000	174500000	2	7	117500000	118000000	6	-0.892857
1_1	174500000	175000000	0	8	3500000	4000000	6	-0.892857
1_1	175000000	175500000	0	8	7500000	8000000	6	-0.892857
1_1	175500000	176000000	4	8	25000000	25500000	6	-0.892857
1_1	176000000	176500000	5	8	57500000	58000000	6	-0.892857
1_1	176500000	177000000	0	8	59500000	60000000	6	-0.892857
1_1	177000000	177500000	0	8	60000000	60500000	6	-0.892857
1_1	177500000	178000000	2	8	72500000	73000000	6	-0.892857
1_1	178000000	178500000	2	8	86000000	86500000	6	-0.892857
1_1	178500000	179000000	1	9	26500000	27000000	6	-0.892857
1_1	179000000	179500000	0	X	115500000	116000000	6	-0.892857
1_1	179500000	180000000	1	10	11500000	12000000	5	-0.928571
1_1	180000000	180500000	3	10	12000000	12500000	5	-0.928571
1_1	180500000	181000000	0	10	13500000	14000000	5	-0.928571
1_1	181000000	181500000	1	10	14500000	15000000	5	-0.928571
1_1	181500000	182000000	1	10	17500000	18000000	5	-0.928571
1_1	182000000	182500000	2	10	19500000	20000000	5	-0.928571
1_1	182500000	183000000	3	1_1	6000000	6500000	5	-0.928571
1_1	183000000	183500000	2	1_1	31500000	32000000	5	-0.928571
1_1	183500000	184000000	3	1_1	38000000	38500000	5	-0.928571
1_1	184000000	184500000	3	1_1	74500000	75000000	5	-0.928571
1_1	184500000	185000000	6	1_1	119500000	120000000	5	-0.928571
1_1	185000000	185500000	3	1_1	126000000	126500000	5	-0.928571
1_1	185500000	186000000	4	1_1	152000000	152500000	5	-0.928571
1_1	186000000	186500000	5	1_1	156000000	156500000	5	-0.928571
1_1	186500000	187000000	1	1_1	162000000	162500000	5	-0.928571
1_1	187000000	187500000	3	1_1	167000000	167500000	5	-0.928571
1_1	187500000	188000000	3	1_1	176000000	176500000	5	-0.928571
1_1	188000000	188500000	5	1_1	186000000	186500000	5	-0.928571
1_1	188500000	189000000	1	1_1	188000000	188500000	5	-0.928571
1_1	189000000	189500000	4	1_1	189500000	190000000	5	-0.928571
1_1	189500000	190000000	5	1_1	190500000	191000000	5	-0.928571
1_1	190000000	190500000	7	1_1	191500000	192000000	5	-0.928571
1_1	190500000	191000000	5	1_1	195500000	196000000	5	-0.928571
1_1	191000000	191500000	6	1_1	200500000	201000000	5	-0.928571
1_1	191500000	192000000	5	1_1	212500000	213000000	5	-0.928571
1_1	192000000	192500000	4	1_1	222000000	222500000	5	-0.928571
1_1	192500000	193000000	1	1_1	229500000	230000000	5	-0.928571
1_1	193000000	193500000	0	1_1	248500000	249000000	5	-0.928571
1_1	193500000	194000000	7	1_1	256500000	257000000	5	-0.928571
1_1	194000000	194500000	3	1_2	33500000	34000000	5	-0.928571
1_1	194500000	195000000	0	1_2	41000000	41500000	5	-0.928571
1_1	195000000	195500000	1	1_2	59000000	59500000	5	-0.928571
1_1	195500000	196000000	5	1_2	59500000	60000000	5	-0.928571
1_1	196000000	196500000	0	1_2	67000000	67500000	5	-0.928571
1_1	196500000	197000000	7	1_2	68000000	68500000	5	-0.928571
1_1	197000000	197500000	2	1_2	69500000	70000000	5	-0.928571
1_1	197500000	198000000	2	1_2	72000000	72500000	5	-0.928571
1_1	198000000	198500000	3	1_2	78000000	78500000	5	-0.928571
1_1	198500000	199000000	1	1_2	80500000	81000000	5	-0.928571
1_1	199000000	199500000	4	1_2	82000000	82500000	5	-0.928571
1_1	199500000	200000000	2	1_2	95500000	96000000	5	-0.928571
1_1	200000000	200500000	0	1_2	102500000	103000000	5	-0.928571
1_1	200500000	201000000	5	1_2	104500000	105000000	5	-0.928571
1_1	201000000	201500000	3	1_2	105000000	105500000	5	-0.928571
1_1	201500000	202000000	2	1_2	108000000	108500000	5	-0.928571
1_1	202000000	202500000	9	1_2	111500000	112000000	5	-0.928571
1_1	202500000	203000000	3	1_2	113500000	114000000	5	-0.928571
1_1	203000000	203500000	4	1_2	120500000	121000000	5	-0.928571
1_1	203500000	204000000	2	1_2	138000000	138500000	5	-0.928571
1_1	204000000	204500000	6	1_2	140000000	140500000	5	-0.928571
1_1	204500000	205000000	1	1_2	143500000	144000000	5	-0.928571
1_1	205000000	205500000	0	1_2	163000000	163500000	5	-0.928571
1_1	205500000	206000000	1	1_2	194000000	194500000	5	-0.928571
1_1	206000000	206500000	1	1_2	202000000	202500000	5	-0.928571
1_1	206500000	207000000	2	1_2	214500000	215000000	5	-0.928571
1_1	207000000	207500000	0	1_2	218500000	219000000	5	-0.928571
1_1	207500000	208000000	1	1_2	219000000	219500000	5	-0.928571
1_1	208000000	208500000	1	1_2	226000000	226500000	5	-0.928571
1_1	208500000	209000000	0	1_2	230500000	231000000	5	-0.928571
1_1	209000000	209500000	3	1_2	231000000	231500000	5	-0.928571
1_1	209500000	210000000	2	1_2	235000000	235500000	5	-0.928571
1_1	210000000	210500000	3	1_2	241000000	241500000	5	-0.928571
1_1	210500000	211000000	1	1_2	244000000	244500000	5	-0.928571
1_1	211000000	211500000	0	1_2	252500000	253000000	5	-0.928571
1_1	211500000	212000000	1	1_2	263500000	264000000	5	-0.928571
1_1	212000000	212500000	1	1_2	264500000	265000000	5	-0.928571
1_1	212500000	213000000	5	1_2	267500000	268000000	5	-0.928571
1_1	213000000	213500000	2	2	8000000	8500000	5	-0.928571
1_1	213500000	214000000	0	2	21500000	22000000	5	-0.928571
1_1	214000000	214500000	2	2	30500000	31000000	5	-0.928571
1_1	214500000	215000000	4	2	32500000	33000000	5	-0.928571
1_1	215000000	215500000	0	2	34000000	34500000	5	-0.928571
1_1	215500000	216000000	0	2	36500000	37000000	5	-0.928571
1_1	216000000	216500000	2	2	52500000	53000000	5	-0.928571
1_1	216500000	217000000	6	2	54000000	54500000	5	-0.928571
1_1	217000000	217500000	3	2	57000000	57500000	5	-0.928571
1_1	217500000	218000000	1	2	60500000	61000000	5	-0.928571
1_1	218000000	218500000	1	2	69000000	69500000	5	-0.928571
1_1	218500000	219000000	3	2	79000000	79500000	5	-0.928571
1_1	219000000	219500000	1	2	87000000	87500000	5	-0.928571
1_1	219500000	220000000	2	2	108000000	108500000	5	-0.928571
1_1	220000000	220500000	4	2	115000000	115500000	5	-0.928571
1_1	220500000	221000000	7	2	128000000	128500000	5	-0.928571
1_1	221000000	221500000	4	2	131000000	131500000	5	-0.928571
1_1	221500000	222000000	1	2	149500000	150000000	5	-0.928571
1_1	222000000	222500000	5	2	159500000	160000000	5	-0.928571
1_1	222500000	223000000	0	2	178500000	179000000	5	-0.928571
1_1	223000000	223500000	6	2	204500000	205000000	5	-0.928571
1_1	223500000	224000000	4	2	226000000	226500000	5	-0.928571
1_1	224000000	224500000	3	2	236000000	236500000	5	-0.928571
1_1	224500000	225000000	1	2	241500000	242000000	5	-0.928571
1_1	225000000	225500000	0	2	249500000	250000000	5	-0.928571
1_1	225500000	226000000	0	2	259500000	260000000	5	-0.928571
1_1	226000000	226500000	3	2	271500000	272000000	5	-0.928571
1_1	226500000	227000000	0	2	275000000	275500000	5	-0.928571
1_1	227000000	227500000	1	2	280000000	280500000	5	-0.928571
1_1	227500000	228000000	1	2	282000000	282500000	5	-0.928571
1_1	228000000	228500000	7	2	293500000	294000000	5	-0.928571
1_1	228500000	229000000	1	2	316000000	316500000	5	-0.928571
1_1	229000000	229500000	2	2	321000000	321500000	5	-0.928571
1_1	229500000	230000000	5	2	326500000	327000000	5	-0.928571
1_1	230000000	230500000	1	2	337000000	337500000	5	-0.928571
1_1	230500000	231000000	1	2	338000000	338500000	5	-0.928571
1_1	231000000	231500000	3	2	345500000	346000000	5	-0.928571
1_1	231500000	232000000	0	2	346500000	347000000	5	-0.928571
1_1	232000000	232500000	0	2	386000000	386500000	5	-0.928571
1_1	232500000	233000000	1	2	389000000	389500000	5	-0.928571
1_1	233000000	233500000	4	2	400500000	401000000	5	-0.928571
1_1	233500000	234000000	1	2	408500000	409000000	5	-0.928571
1_1	234000000	234500000	0	2	414500000	415000000	5	-0.928571
1_1	234500000	235000000	1	2	427000000	427500000	5	-0.928571
1_1	235000000	235500000	4	2	444000000	444500000	5	-0.928571
1_1	235500000	236000000	3	2	451500000	452000000	5	-0.928571
1_1	236000000	236500000	1	2	454500000	455000000	5	-0.928571
1_1	236500000	237000000	3	2	458500000	459000000	5	-0.928571
1_1	237000000	237500000	2	2	460500000	461000000	5	-0.928571
1_1	237500000	238000000	3	3	5000000	5500000	5	-0.928571
1_1	238000000	238500000	6	3	15500000	16000000	5	-0.928571
1_1	238500000	239000000	1	3	17000000	17500000	5	-0.928571
1_1	239000000	239500000	2	3	18500000	19000000	5	-0.928571
1_1	239500000	240000000	9	3	19500000	20000000	5	-0.928571
1_1	240000000	240500000	1	3	29000000	29500000	5	-0.928571
1_1	240500000	241000000	3	3	33000000	33500000	5	-0.928571
1_1	241000000	241500000	0	3	41500000	42000000	5	-0.928571
1_1	241500000	242000000	0	3	56000000	56500000	5	-0.928571
1_1	242000000	242500000	8	3	65000000	65500000	5	-0.928571
1_1	242500000	243000000	1	3	92000000	92500000	5	-0.928571
1_1	243000000	243500000	2	3	108500000	109000000	5	-0.928571
1_1	243500000	244000000	1	3	109500000	110000000	5	-0.928571
1_1	244000000	244500000	1	3	111500000	112000000	5	-0.928571
1_1	244500000	245000000	2	3	115000000	115500000	5	-0.928571
1_1	245000000	245500000	2	3	117500000	118000000	5	-0.928571
1_1	245500000	246000000	3	3	126500000	127000000	5	-0.928571
1_1	246000000	246500000	3	3	129000000	129500000	5	-0.928571
1_1	246500000	247000000	4	3	137000000	137500000	5	-0.928571
1_1	247000000	247500000	1	3	142000000	142500000	5	-0.928571
1_1	247500000	248000000	0	3	147000000	147500000	5	-0.928571
1_1	248000000	248500000	4	3	153500000	154000000	5	-0.928571
1_1	248500000	249000000	5	3	158500000	159000000	5	-0.928571
1_1	249000000	249500000	3	3	162000000	162500000	5	-0.928571
1_1	249500000	250000000	4	3	163000000	163500000	5	-0.928571
1_1	250000000	250500000	0	3	165500000	166000000	5	-0.928571
1_1	250500000	251000000	3	3	166500000	167000000	5	-0.928571
1_1	251000000	251500000	2	3	167500000	168000000	5	-0.928571
1_1	251500000	252000000	7	3	175000000	175500000	5	-0.928571
1_1	252000000	252500000	1	3	176000000	176500000	5	-0.928571
1_1	252500000	253000000	4	3	179000000	179500000	5	-0.928571
1_1	253000000	253500000	6	3	180000000	180500000	5	-0.928571
1_1	253500000	254000000	2	3	190500000	191000000	5	-0.928571
1_1	254000000	254500000	3	3	194000000	194500000	5	-0.928571
1_1	254500000	255000000	1	3	214500000	215000000	5	-0.928571
1_1	255000000	255500000	4	3	227500000	228000000	5	-0.928571
1_1	255500000	256000000	0	3	236500000	237000000	5	-0.928571
1_1	256000000	256500000	0	3	239000000	239500000	5	-0.928571
1_1	256500000	257000000	5	3	241500000	242000000	5	-0.928571
1_1	257000000	257500000	2	3	256500000	257000000	5	-0.928571
1_1	257500000	258000000	4	3	259500000	260000000	5	-0.928571
1_1	258000000	258500000	0	3	261000000	261500000	5	-0.928571
1_1	258500000	259000000	0	3	271000000	271500000	5	-0.928571
1_1	259000000	259500000	1	3	273500000	274000000	5	-0.928571
1_1	259500000	260000000	1	4	0	500000	5	-0.928571
1_1	260000000	260500000	2	4	500000	1000000	5	-0.928571
1_1	260500000	261000000	0	4	4000000	4500000	5	-0.928571
1_1	261000000	261500000	0	4	9500000	10000000	5	-0.928571
1_1	261500000	262000000	8	4	11500000	12000000	5	-0.928571
1_1	262000000	262500000	0	4	16500000	17000000	5	-0.928571
1_1	262500000	263000000	0	4	18500000	19000000	5	-0.928571
1_1	263000000	263500000	3	4	25500000	26000000	5	-0.928571
1_1	263500000	264000000	0	4	28000000	28500000	5	-0.928571
1_1	264000000	264500000	3	4	29500000	30000000	5	-0.928571
1_1	264500000	265000000	2	4	38000000	38500000	5	-0.928571
1_1	265000000	265500000	6	4	40000000	40500000	5	-0.928571
1_1	265500000	266000000	0	4	48500000	49000000	5	-0.928571
1_1	266000000	266500000	6	4	52000000	52500000	5	-0.928571
1_1	266500000	267000000	0	4	58500000	59000000	5	-0.928571
1_1	267000000	267500000	1	4	59000000	59500000	5	-0.928571
1_1	267500000	268000000	2	4	61000000	61500000	5	-0.928571
1_1	268000000	268500000	1	4	61500000	62000000	5	-0.928571
1_1	268500000	269000000	2	4	66000000	66500000	5	-0.928571
1_1	269000000	269500000	2	4	71500000	72000000	5	-0.928571
1_1	269500000	270000000	6	4	72000000	72500000	5	-0.928571
1_1	270000000	270500000	2	4	83500000	84000000	5	-0.928571
1_1	270500000	271000000	2	4	92000000	92500000	5	-0.928571
1_1	271000000	271500000	2	4	100000000	100500000	5	-0.928571
1_1	271500000	272000000	0	4	100500000	101000000	5	-0.928571
1_1	272000000	272500000	3	4	107000000	107500000	5	-0.928571
1_1	272500000	273000000	0	4	108000000	108500000	5	-0.928571
1_1	273000000	273500000	4	4	126500000	127000000	5	-0.928571
1_1	273500000	274000000	3	4	135500000	136000000	5	-0.928571
1_1	274000000	274500000	2	4	137000000	137500000	5	-0.928571
1_1	274500000	275000000	1	4	147000000	147500000	5	-0.928571
1_1	275000000	275500000	6	4	150000000	150500000	5	-0.928571
1_1	275500000	275698159	3	4	151500000	152000000	5	-0.928571
1_2	0	500000	3	4	155500000	156000000	5	-0.928571
1_2	500000	1000000	2	4	156000000	156500000	5	-0.928571
1_2	1000000	1500000	4	4	160000000	160500000	5	-0.928571
1_2	1500000	2000000	0	4	164500000	165000000	5	-0.928571
1_2	2000000	2500000	1	4	167000000	167500000	5	-0.928571
1_2	2500000	3000000	4	4	176000000	176500000	5	-0.928571
1_2	3000000	3500000	6	4	179500000	180000000	5	-0.928571
1_2	3500000	4000000	0	4	182000000	182500000	5	-0.928571
1_2	4000000	4500000	6	4	183000000	183500000	5	-0.928571
1_2	4500000	5000000	1	4	185500000	186000000	5	-0.928571
1_2	5000000	5500000	0	4	194000000	194500000	5	-0.928571
1_2	5500000	6000000	0	4	195500000	196000000	5	-0.928571
1_2	6000000	6500000	3	4	199000000	199500000	5	-0.928571
1_2	6500000	7000000	3	4	208000000	208500000	5	-0.928571
1_2	7000000	7500000	1	4	212000000	212500000	5	-0.928571
1_2	7500000	8000000	0	5	10500000	11000000	5	-0.928571
1_2	8000000	8500000	3	5	12000000	12500000	5	-0.928571
1_2	8500000	9000000	3	5	17000000	17500000	5	-0.928571
1_2	9000000	9500000	2	5	29500000	30000000	5	-0.928571
1_2	9500000	10000000	2	5	33000000	33500000	5	-0.928571
1_2	10000000	10500000	3	5	39500000	40000000	5	-0.928571
1_2	10500000	11000000	1	5	48500000	49000000	5	-0.928571
1_2	11000000	11500000	2	5	59500000	60000000	5	-0.928571
1_2	11500000	12000000	4	5	69500000	70000000	5	-0.928571
1_2	12000000	12500000	2	5	72500000	73000000	5	-0.928571
1_2	12500000	13000000	0	5	74000000	74500000	5	-0.928571
1_2	13000000	13500000	2	5	87500000	88000000	5	-0.928571
1_2	13500000	14000000	2	5	90500000	91000000	5	-0.928571
1_2	14000000	14500000	1	5	98500000	99000000	5	-0.928571
1_2	14500000	15000000	3	5	103500000	104000000	5	-0.928571
1_2	15000000	15500000	3	5	104500000	105000000	5	-0.928571
1_2	15500000	16000000	1	5	116500000	117000000	5	-0.928571
1_2	16000000	16500000	0	5	117500000	118000000	5	-0.928571
1_2	16500000	17000000	6	5	130000000	130500000	5	-0.928571
1_2	17000000	17500000	1	5	149000000	149500000	5	-0.928571
1_2	17500000	18000000	1	5	151500000	152000000	5	-0.928571
1_2	18000000	18500000	3	5	183000000	183500000	5	-0.928571
1_2	18500000	19000000	2	5	187500000	188000000	5	-0.928571
1_2	19000000	19500000	1	5	188000000	188500000	5	-0.928571
1_2	19500000	20000000	1	6	2500000	3000000	5	-0.928571
1_2	20000000	20500000	0	6	11000000	11500000	5	-0.928571
1_2	20500000	21000000	0	6	14000000	14500000	5	-0.928571
1_2	21000000	21500000	0	6	17500000	18000000	5	-0.928571
1_2	21500000	22000000	3	6	26000000	26500000	5	-0.928571
1_2	22000000	22500000	1	6	36000000	36500000	5	-0.928571
1_2	22500000	23000000	3	6	48500000	49000000	5	-0.928571
1_2	23000000	23500000	1	6	49500000	50000000	5	-0.928571
1_2	23500000	24000000	2	6	66000000	66500000	5	-0.928571
1_2	24000000	24500000	1	6	67000000	67500000	5	-0.928571
1_2	24500000	25000000	2	6	72500000	73000000	5	-0.928571
1_2	25000000	25500000	4	6	90500000	91000000	5	-0.928571
1_2	25500000	26000000	0	6	91500000	92000000	5	-0.928571
1_2	26000000	26500000	7	6	109000000	109500000	5	-0.928571
1_2	26500000	27000000	1	6	109500000	110000000	5	-0.928571
1_2	27000000	27500000	2	6	112000000	112500000	5	-0.928571
1_2	27500000	28000000	0	6	116500000	117000000	5	-0.928571
1_2	28000000	28500000	1	6	134000000	134500000	5	-0.928571
1_2	28500000	29000000	4	6	134500000	135000000	5	-0.928571
1_2	29000000	29500000	1	6	141000000	141500000	5	-0.928571
1_2	29500000	30000000	4	6	150000000	150500000	5	-0.928571
1_2	30000000	30500000	8	7	24500000	25000000	5	-0.928571
1_2	30500000	31000000	6	7	56500000	57000000	5	-0.928571
1_2	31000000	31500000	7	7	81500000	82000000	5	-0.928571
1_2	31500000	32000000	2	7	92500000	93000000	5	-0.928571
1_2	32000000	32500000	12	7	95000000	95500000	5	-0.928571
1_2	32500000	33000000	4	7	105000000	105500000	5	-0.928571
1_2	33000000	33500000	3	7	108500000	109000000	5	-0.928571
1_2	33500000	34000000	5	7	114000000	114500000	5	-0.928571
1_2	34000000	34500000	3	8	500000	1000000	5	-0.928571
1_2	34500000	35000000	0	8	11500000	12000000	5	-0.928571
1_2	35000000	35500000	1	8	36000000	36500000	5	-0.928571
1_2	35500000	36000000	4	8	44500000	45000000	5	-0.928571
1_2	36000000	36500000	1	8	78000000	78500000	5	-0.928571
1_2	36500000	37000000	2	8	80000000	80500000	5	-0.928571
1_2	37000000	37500000	4	8	82500000	83000000	5	-0.928571
1_2	37500000	38000000	2	8	89000000	89500000	5	-0.928571
1_2	38000000	38500000	4	8	90000000	90500000	5	-0.928571
1_2	38500000	39000000	6	8	96500000	97000000	5	-0.928571
1_2	39000000	39500000	2	9	16500000	17000000	5	-0.928571
1_2	39500000	40000000	2	X	53000000	53500000	5	-0.928571
1_2	40000000	40500000	3	X	118000000	118500000	5	-0.928571
1_2	40500000	41000000	2	X	126000000	126500000	5	-0.928571
1_2	41000000	41500000	5	10	1500000	2000000	4	-0.964286
1_2	41500000	42000000	3	10	13000000	13500000	4	-0.964286
1_2	42000000	42500000	1	10	15000000	15500000	4	-0.964286
1_2	42500000	43000000	3	10	29000000	29500000	4	-0.964286
1_2	43000000	43500000	0	10	29500000	30000000	4	-0.964286
1_2	43500000	44000000	2	1_1	1500000	2000000	4	-0.964286
1_2	44000000	44500000	2	1_1	3500000	4000000	4	-0.964286
1_2	44500000	45000000	3	1_1	12000000	12500000	4	-0.964286
1_2	45000000	45500000	1	1_1	14000000	14500000	4	-0.964286
1_2	45500000	46000000	0	1_1	14500000	15000000	4	-0.964286
1_2	46000000	46500000	0	1_1	16500000	17000000	4	-0.964286
1_2	46500000	47000000	3	1_1	17500000	18000000	4	-0.964286
1_2	47000000	47500000	6	1_1	25500000	26000000	4	-0.964286
1_2	47500000	48000000	1	1_1	28000000	28500000	4	-0.964286
1_2	48000000	48500000	1	1_1	31000000	31500000	4	-0.964286
1_2	48500000	49000000	1	1_1	42500000	43000000	4	-0.964286
1_2	49000000	49500000	2	1_1	56000000	56500000	4	-0.964286
1_2	49500000	50000000	2	1_1	58500000	59000000	4	-0.964286
1_2	50000000	50500000	0	1_1	63500000	64000000	4	-0.964286
1_2	50500000	51000000	4	1_1	68500000	69000000	4	-0.964286
1_2	51000000	51500000	1	1_1	77500000	78000000	4	-0.964286
1_2	51500000	52000000	2	1_1	100000000	100500000	4	-0.964286
1_2	52000000	52500000	2	1_1	105500000	106000000	4	-0.964286
1_2	52500000	53000000	2	1_1	112500000	113000000	4	-0.964286
1_2	53000000	53500000	1	1_1	117500000	118000000	4	-0.964286
1_2	53500000	54000000	2	1_1	120500000	121000000	4	-0.964286
1_2	54000000	54500000	2	1_1	134000000	134500000	4	-0.964286
1_2	54500000	55000000	1	1_1	138500000	139000000	4	-0.964286
1_2	55000000	55500000	3	1_1	141000000	141500000	4	-0.964286
1_2	55500000	56000000	2	1_1	147500000	148000000	4	-0.964286
1_2	56000000	56500000	3	1_1	175500000	176000000	4	-0.964286
1_2	56500000	57000000	3	1_1	185500000	186000000	4	-0.964286
1_2	57000000	57500000	4	1_1	189000000	189500000	4	-0.964286
1_2	57500000	58000000	0	1_1	192000000	192500000	4	-0.964286
1_2	58000000	58500000	3	1_1	199000000	199500000	4	-0.964286
1_2	58500000	59000000	3	1_1	203000000	203500000	4	-0.964286
1_2	59000000	59500000	5	1_1	214500000	215000000	4	-0.964286
1_2	59500000	60000000	5	1_1	220000000	220500000	4	-0.964286
1_2	60000000	60500000	6	1_1	221000000	221500000	4	-0.964286
1_2	60500000	61000000	3	1_1	223500000	224000000	4	-0.964286
1_2	61000000	61500000	2	1_1	233000000	233500000	4	-0.964286
1_2	61500000	62000000	12	1_1	235000000	235500000	4	-0.964286
1_2	62000000	62500000	4	1_1	246500000	247000000	4	-0.964286
1_2	62500000	63000000	3	1_1	248000000	248500000	4	-0.964286
1_2	63000000	63500000	2	1_1	249500000	250000000	4	-0.964286
1_2	63500000	64000000	2	1_1	252500000	253000000	4	-0.964286
1_2	64000000	64500000	2	1_1	255000000	255500000	4	-0.964286
1_2	64500000	65000000	3	1_1	257500000	258000000	4	-0.964286
1_2	65000000	65500000	1	1_1	273000000	273500000	4	-0.964286
1_2	65500000	66000000	7	1_2	1000000	1500000	4	-0.964286
1_2	66000000	66500000	1	1_2	2500000	3000000	4	-0.964286
1_2	66500000	67000000	4	1_2	11500000	12000000	4	-0.964286
1_2	67000000	67500000	5	1_2	25000000	25500000	4	-0.964286
1_2	67500000	68000000	1	1_2	28500000	29000000	4	-0.964286
1_2	68000000	68500000	5	1_2	29500000	30000000	4	-0.964286
1_2	68500000	69000000	3	1_2	32500000	33000000	4	-0.964286
1_2	69000000	69500000	3	1_2	35500000	36000000	4	-0.964286
1_2	69500000	70000000	5	1_2	37000000	37500000	4	-0.964286
1_2	70000000	70500000	3	1_2	38000000	38500000	4	-0.964286
1_2	70500000	71000000	2	1_2	50500000	51000000	4	-0.964286
1_2	71000000	71500000	1	1_2	57000000	57500000	4	-0.964286
1_2	71500000	72000000	3	1_2	62000000	62500000	4	-0.964286
1_2	72000000	72500000	5	1_2	66500000	67000000	4	-0.964286
1_2	72500000	73000000	7	1_2	98500000	99000000	4	-0.964286
1_2	73000000	73500000	3	1_2	101500000	102000000	4	-0.964286
1_2	73500000	74000000	3	1_2	105500000	106000000	4	-0.964286
1_2	74000000	74500000	3	1_2	110500000	111000000	4	-0.964286
1_2	74500000	75000000	1	1_2	114000000	114500000	4	-0.964286
1_2	75000000	75500000	0	1_2	114500000	115000000	4	-0.964286
1_2	75500000	76000000	2	1_2	117000000	117500000	4	-0.964286
1_2	76000000	76500000	6	1_2	132000000	132500000	4	-0.964286
1_2	76500000	77000000	6	1_2	137500000	138000000	4	-0.964286
1_2	77000000	77500000	1	1_2	142500000	143000000	4	-0.964286
1_2	77500000	78000000	9	1_2	162000000	162500000	4	-0.964286
1_2	78000000	78500000	5	1_2	169000000	169500000	4	-0.964286
1_2	78500000	79000000	1	1_2	170500000	171000000	4	-0.964286
1_2	79000000	79500000	1	1_2	173000000	173500000	4	-0.964286
1_2	79500000	80000000	0	1_2	179500000	180000000	4	-0.964286
1_2	80000000	80500000	2	1_2	184000000	184500000	4	-0.964286
1_2	80500000	81000000	5	1_2	188500000	189000000	4	-0.964286
1_2	81000000	81500000	2	1_2	189500000	190000000	4	-0.964286
1_2	81500000	82000000	3	1_2	204000000	204500000	4	-0.964286
1_2	82000000	82500000	5	1_2	208500000	209000000	4	-0.964286
1_2	82500000	83000000	1	1_2	212000000	212500000	4	-0.964286
1_2	83000000	83500000	1	1_2	216500000	217000000	4	-0.964286
1_2	83500000	84000000	1	1_2	229500000	230000000	4	-0.964286
1_2	84000000	84500000	0	1_2	234000000	234500000	4	-0.964286
1_2	84500000	85000000	2	1_2	241500000	242000000	4	-0.964286
1_2	85000000	85500000	2	1_2	242000000	242500000	4	-0.964286
1_2	85500000	86000000	0	1_2	257000000	257500000	4	-0.964286
1_2	86000000	86500000	2	1_2	259000000	259500000	4	-0.964286
1_2	86500000	87000000	3	2	1000000	1500000	4	-0.964286
1_2	87000000	87500000	1	2	6000000	6500000	4	-0.964286
1_2	87500000	88000000	3	2	6500000	7000000	4	-0.964286
1_2	88000000	88500000	2	2	9500000	10000000	4	-0.964286
1_2	88500000	89000000	0	2	10000000	10500000	4	-0.964286
1_2	89000000	89500000	1	2	11500000	12000000	4	-0.964286
1_2	89500000	90000000	1	2	23500000	24000000	4	-0.964286
1_2	90000000	90500000	1	2	43000000	43500000	4	-0.964286
1_2	90500000	91000000	6	2	43500000	44000000	4	-0.964286
1_2	91000000	91500000	1	2	47000000	47500000	4	-0.964286
1_2	91500000	92000000	0	2	49500000	50000000	4	-0.964286
1_2	92000000	92500000	1	2	51000000	51500000	4	-0.964286
1_2	92500000	93000000	1	2	51500000	52000000	4	-0.964286
1_2	93000000	93500000	2	2	52000000	52500000	4	-0.964286
1_2	93500000	94000000	6	2	54500000	55000000	4	-0.964286
1_2	94000000	94500000	6	2	59500000	60000000	4	-0.964286
1_2	94500000	95000000	2	2	61000000	61500000	4	-0.964286
1_2	95000000	95500000	3	2	73500000	74000000	4	-0.964286
1_2	95500000	96000000	5	2	75000000	75500000	4	-0.964286
1_2	96000000	96500000	0	2	82500000	83000000	4	-0.964286
1_2	96500000	97000000	2	2	89500000	90000000	4	-0.964286
1_2	97000000	97500000	3	2	91000000	91500000	4	-0.964286
1_2	97500000	98000000	1	2	93500000	94000000	4	-0.964286
1_2	98000000	98500000	1	2	94000000	94500000	4	-0.964286
1_2	98500000	99000000	4	2	95500000	96000000	4	-0.964286
1_2	99000000	99500000	3	2	96500000	97000000	4	-0.964286
1_2	99500000	100000000	2	2	101500000	102000000	4	-0.964286
1_2	100000000	100500000	6	2	131500000	132000000	4	-0.964286
1_2	100500000	101000000	2	2	151500000	152000000	4	-0.964286
1_2	101000000	101500000	1	2	172500000	173000000	4	-0.964286
1_2	101500000	102000000	4	2	175500000	176000000	4	-0.964286
1_2	102000000	102500000	2	2	181500000	182000000	4	-0.964286
1_2	102500000	103000000	5	2	187500000	188000000	4	-0.964286
1_2	103000000	103500000	2	2	190500000	191000000	4	-0.964286
1_2	103500000	104000000	0	2	194500000	195000000	4	-0.964286
1_2	104000000	104500000	2	2	215500000	216000000	4	-0.964286
1_2	104500000	105000000	5	2	220000000	220500000	4	-0.964286
1_2	105000000	105500000	5	2	228500000	229000000	4	-0.964286
1_2	105500000	106000000	4	2	230500000	231000000	4	-0.964286
1_2	106000000	106500000	3	2	250500000	251000000	4	-0.964286
1_2	106500000	107000000	2	2	263500000	264000000	4	-0.964286
1_2	107000000	107500000	1	2	264000000	264500000	4	-0.964286
1_2	107500000	108000000	2	2	264500000	265000000	4	-0.964286
1_2	108000000	108500000	5	2	267000000	267500000	4	-0.964286
1_2	108500000	109000000	0	2	269500000	270000000	4	-0.964286
1_2	109000000	109500000	2	2	274000000	274500000	4	-0.964286
1_2	109500000	110000000	2	2	278500000	279000000	4	-0.964286
1_2	110000000	110500000	2	2	285500000	286000000	4	-0.964286
1_2	110500000	111000000	4	2	286000000	286500000	4	-0.964286
1_2	111000000	111500000	2	2	289500000	290000000	4	-0.964286
1_2	111500000	112000000	5	2	305000000	305500000	4	-0.964286
1_2	112000000	112500000	2	2	308000000	308500000	4	-0.964286
1_2	112500000	113000000	1	2	325500000	326000000	4	-0.964286
1_2	113000000	113500000	0	2	328000000	328500000	4	-0.964286
1_2	113500000	114000000	5	2	328500000	329000000	4	-0.964286
1_2	114000000	114500000	4	2	329500000	330000000	4	-0.964286
1_2	114500000	115000000	4	2	330000000	330500000	4	-0.964286
1_2	115000000	115500000	3	2	334000000	334500000	4	-0.964286
1_2	115500000	116000000	3	2	337500000	338000000	4	-0.964286
1_2	116000000	116500000	3	2	340000000	340500000	4	-0.964286
1_2	116500000	117000000	2	2	342000000	342500000	4	-0.964286
1_2	117000000	117500000	4	2	352000000	352500000	4	-0.964286
1_2	117500000	118000000	1	2	356500000	357000000	4	-0.964286
1_2	118000000	118500000	2	2	358000000	358500000	4	-0.964286
1_2	118500000	119000000	2	2	362500000	363000000	4	-0.964286
1_2	119000000	119500000	0	2	365000000	365500000	4	-0.964286
1_2	119500000	120000000	2	2	365500000	366000000	4	-0.964286
1_2	120000000	120500000	2	2	366000000	366500000	4	-0.964286
1_2	120500000	121000000	5	2	367500000	368000000	4	-0.964286
1_2	121000000	121500000	1	2	372500000	373000000	4	-0.964286
1_2	121500000	122000000	0	2	378500000	379000000	4	-0.964286
1_2	122000000	122500000	0	2	385000000	385500000	4	-0.964286
1_2	122500000	123000000	1	2	387000000	387500000	4	-0.964286
1_2	123000000	123500000	0	2	387500000	388000000	4	-0.964286
1_2	123500000	124000000	2	2	391000000	391500000	4	-0.964286
1_2	124000000	124500000	0	2	394000000	394500000	4	-0.964286
1_2	124500000	125000000	1	2	403500000	404000000	4	-0.964286
1_2	125000000	125500000	1	2	415000000	415500000	4	-0.964286
1_2	125500000	126000000	0	2	415500000	416000000	4	-0.964286
1_2	126000000	126500000	3	2	421000000	421500000	4	-0.964286
1_2	126500000	127000000	1	2	431000000	431500000	4	-0.964286
1_2	127000000	127500000	3	2	437000000	437500000	4	-0.964286
1_2	127500000	128000000	0	2	440500000	441000000	4	-0.964286
1_2	128000000	128500000	0	2	442500000	443000000	4	-0.964286
1_2	128500000	129000000	1	2	460000000	460500000	4	-0.964286
1_2	129000000	129500000	1	3	4000000	4500000	4	-0.964286
1_2	129500000	130000000	0	3	14500000	15000000	4	-0.964286
1_2	130000000	130500000	2	3	17500000	18000000	4	-0.964286
1_2	130500000	131000000	2	3	22500000	23000000	4	-0.964286
1_2	131000000	131500000	1	3	24000000	24500000	4	-0.964286
1_2	131500000	132000000	0	3	24500000	25000000	4	-0.964286
1_2	132000000	132500000	4	3	31000000	31500000	4	-0.964286
1_2	132500000	133000000	1	3	33500000	34000000	4	-0.964286
1_2	133000000	133500000	3	3	34500000	35000000	4	-0.964286
1_2	133500000	134000000	2	3	35000000	35500000	4	-0.964286
1_2	134000000	134500000	2	3	47000000	47500000	4	-0.964286
1_2	134500000	135000000	3	3	49500000	50000000	4	-0.964286
1_2	135000000	135500000	0	3	51500000	52000000	4	-0.964286
1_2	135500000	136000000	0	3	61000000	61500000	4	-0.964286
1_2	136000000	136500000	1	3	66000000	66500000	4	-0.964286
1_2	136500000	137000000	1	3	69500000	70000000	4	-0.964286
1_2	137000000	137500000	0	3	71000000	71500000	4	-0.964286
1_2	137500000	138000000	4	3	72500000	73000000	4	-0.964286
1_2	138000000	138500000	5	3	76000000	76500000	4	-0.964286
1_2	138500000	139000000	0	3	98000000	98500000	4	-0.964286
1_2	139000000	139500000	1	3	101500000	102000000	4	-0.964286
1_2	139500000	140000000	2	3	105000000	105500000	4	-0.964286
1_2	140000000	140500000	5	3	106000000	106500000	4	-0.964286
1_2	140500000	141000000	2	3	108000000	108500000	4	-0.964286
1_2	141000000	141500000	2	3	109000000	109500000	4	-0.964286
1_2	141500000	142000000	2	3	112000000	112500000	4	-0.964286
1_2	142000000	142500000	2	3	113000000	113500000	4	-0.964286
1_2	142500000	143000000	4	3	114000000	114500000	4	-0.964286
1_2	143000000	143500000	1	3	119000000	119500000	4	-0.964286
1_2	143500000	144000000	5	3	120000000	120500000	4	-0.964286
1_2	144000000	144500000	3	3	125000000	125500000	4	-0.964286
1_2	144500000	145000000	0	3	125500000	126000000	4	-0.964286
1_2	145000000	145500000	1	3	127500000	128000000	4	-0.964286
1_2	145500000	146000000	0	3	128500000	129000000	4	-0.964286
1_2	146000000	146500000	1	3	129500000	130000000	4	-0.964286
1_2	146500000	147000000	1	3	130000000	130500000	4	-0.964286
1_2	147000000	147500000	0	3	136500000	137000000	4	-0.964286
1_2	147500000	148000000	1	3	137500000	138000000	4	-0.964286
1_2	148000000	148500000	2	3	139500000	140000000	4	-0.964286
1_2	148500000	149000000	1	3	141500000	142000000	4	-0.964286
1_2	149000000	149500000	0	3	142500000	143000000	4	-0.964286
1_2	149500000	150000000	3	3	143000000	143500000	4	-0.964286
1_2	150000000	150500000	3	3	148500000	149000000	4	-0.964286
1_2	150500000	151000000	2	3	152500000	153000000	4	-0.964286
1_2	151000000	151500000	2	3	159500000	160000000	4	-0.964286
1_2	151500000	152000000	0	3	170500000	171000000	4	-0.964286
1_2	152000000	152500000	3	3	182000000	182500000	4	-0.964286
1_2	152500000	153000000	1	3	184500000	185000000	4	-0.964286
1_2	153000000	153500000	1	3	185000000	185500000	4	-0.964286
1_2	153500000	154000000	0	3	186500000	187000000	4	-0.964286
1_2	154000000	154500000	2	3	187500000	188000000	4	-0.964286
1_2	154500000	155000000	3	3	188000000	188500000	4	-0.964286
1_2	155000000	155500000	0	3	190000000	190500000	4	-0.964286
1_2	155500000	156000000	3	3	193500000	194000000	4	-0.964286
1_2	156000000	156500000	1	3	196500000	197000000	4	-0.964286
1_2	156500000	157000000	0	3	205500000	206000000	4	-0.964286
1_2	157000000	157500000	3	3	229000000	229500000	4	-0.964286
1_2	157500000	158000000	1	3	236000000	236500000	4	-0.964286
1_2	158000000	158500000	8	3	238000000	238500000	4	-0.964286
1_2	158500000	159000000	2	3	240500000	241000000	4	-0.964286
1_2	159000000	159500000	1	3	241000000	241500000	4	-0.964286
1_2	159500000	160000000	0	3	244000000	244500000	4	-0.964286
1_2	160000000	160500000	0	3	246000000	246500000	4	-0.964286
1_2	160500000	161000000	0	3	248500000	249000000	4	-0.964286
1_2	161000000	161500000	1	3	253000000	253500000	4	-0.964286
1_2	161500000	162000000	2	3	255500000	256000000	4	-0.964286
1_2	162000000	162500000	4	3	257000000	257500000	4	-0.964286
1_2	162500000	163000000	3	3	267000000	267500000	4	-0.964286
1_2	163000000	163500000	5	3	268500000	269000000	4	-0.964286
1_2	163500000	164000000	3	3	281000000	281500000	4	-0.964286
1_2	164000000	164500000	3	4	1500000	2000000	4	-0.964286
1_2	164500000	165000000	2	4	10000000	10500000	4	-0.964286
1_2	165000000	165500000	3	4	11000000	11500000	4	-0.964286
1_2	165500000	166000000	3	4	13000000	13500000	4	-0.964286
1_2	166000000	166500000	1	4	17000000	17500000	4	-0.964286
1_2	166500000	167000000	0	4	19000000	19500000	4	-0.964286
1_2	167000000	167500000	1	4	20000000	20500000	4	-0.964286
1_2	167500000	168000000	1	4	20500000	21000000	4	-0.964286
1_2	168000000	168500000	1	4	30500000	31000000	4	-0.964286
1_2	168500000	169000000	1	4	33000000	33500000	4	-0.964286
1_2	169000000	169500000	4	4	39000000	39500000	4	-0.964286
1_2	169500000	170000000	3	4	45500000	46000000	4	-0.964286
1_2	170000000	170500000	2	4	51000000	51500000	4	-0.964286
1_2	170500000	171000000	4	4	60000000	60500000	4	-0.964286
1_2	171000000	171500000	1	4	62000000	62500000	4	-0.964286
1_2	171500000	172000000	3	4	69500000	70000000	4	-0.964286
1_2	172000000	172500000	2	4	76000000	76500000	4	-0.964286
1_2	172500000	173000000	3	4	77500000	78000000	4	-0.964286
1_2	173000000	173500000	4	4	80000000	80500000	4	-0.964286
1_2	173500000	174000000	1	4	85500000	86000000	4	-0.964286
1_2	174000000	174500000	1	4	101500000	102000000	4	-0.964286
1_2	174500000	175000000	1	4	104000000	104500000	4	-0.964286
1_2	175000000	175500000	3	4	106000000	106500000	4	-0.964286
1_2	175500000	176000000	0	4	108500000	109000000	4	-0.964286
1_2	176000000	176500000	1	4	133000000	133500000	4	-0.964286
1_2	176500000	177000000	2	4	142000000	142500000	4	-0.964286
1_2	177000000	177500000	1	4	144000000	144500000	4	-0.964286
1_2	177500000	178000000	3	4	146000000	146500000	4	-0.964286
1_2	178000000	178500000	2	4	153000000	153500000	4	-0.964286
1_2	178500000	179000000	0	4	154000000	154500000	4	-0.964286
1_2	179000000	179500000	0	4	158500000	159000000	4	-0.964286
1_2	179500000	180000000	4	4	159000000	159500000	4	-0.964286
1_2	180000000	180500000	1	4	160500000	161000000	4	-0.964286
1_2	180500000	181000000	0	4	161500000	162000000	4	-0.964286
1_2	181000000	181500000	0	4	162500000	163000000	4	-0.964286
1_2	181500000	182000000	2	4	165000000	165500000	4	-0.964286
1_2	182000000	182500000	1	4	170000000	170500000	4	-0.964286
1_2	182500000	183000000	3	4	178000000	178500000	4	-0.964286
1_2	183000000	183500000	1	4	181000000	181500000	4	-0.964286
1_2	183500000	184000000	0	4	182500000	183000000	4	-0.964286
1_2	184000000	184500000	4	4	189500000	190000000	4	-0.964286
1_2	184500000	185000000	0	4	191500000	192000000	4	-0.964286
1_2	185000000	185500000	3	4	192000000	192500000	4	-0.964286
1_2	185500000	186000000	2	4	196500000	197000000	4	-0.964286
1_2	186000000	186500000	3	4	197500000	198000000	4	-0.964286
1_2	186500000	187000000	7	4	206500000	207000000	4	-0.964286
1_2	187000000	187500000	1	4	208500000	209000000	4	-0.964286
1_2	187500000	188000000	1	4	217000000	217500000	4	-0.964286
1_2	188000000	188500000	3	4	223000000	223500000	4	-0.964286
1_2	188500000	189000000	4	4	228000000	228500000	4	-0.964286
1_2	189000000	189500000	2	4	228500000	229000000	4	-0.964286
1_2	189500000	190000000	4	4	230500000	231000000	4	-0.964286
1_2	190000000	190500000	1	5	8000000	8500000	4	-0.964286
1_2	190500000	191000000	3	5	10000000	10500000	4	-0.964286
1_2	191000000	191500000	2	5	12500000	13000000	4	-0.964286
1_2	191500000	192000000	1	5	14000000	14500000	4	-0.964286
1_2	192000000	192500000	1	5	18500000	19000000	4	-0.964286
1_2	192500000	193000000	0	5	25500000	26000000	4	-0.964286
1_2	193000000	193500000	0	5	39000000	39500000	4	-0.964286
1_2	193500000	194000000	1	5	41500000	42000000	4	-0.964286
1_2	194000000	194500000	5	5	42000000	42500000	4	-0.964286
1_2	194500000	195000000	0	5	43500000	44000000	4	-0.964286
1_2	195000000	195500000	11	5	44000000	44500000	4	-0.964286
1_2	195500000	196000000	6	5	49500000	50000000	4	-0.964286
1_2	196000000	196500000	11	5	57000000	57500000	4	-0.964286
1_2	196500000	197000000	0	5	68000000	68500000	4	-0.964286
1_2	197000000	197500000	1	5	71000000	71500000	4	-0.964286
1_2	197500000	198000000	1	5	76500000	77000000	4	-0.964286
1_2	198000000	198500000	2	5	80000000	80500000	4	-0.964286
1_2	198500000	199000000	2	5	88500000	89000000	4	-0.964286
1_2	199000000	199500000	1	5	89500000	90000000	4	-0.964286
1_2	199500000	200000000	3	5	93000000	93500000	4	-0.964286
1_2	200000000	200500000	1	5	99000000	99500000	4	-0.964286
1_2	200500000	201000000	2	5	108000000	108500000	4	-0.964286
1_2	201000000	201500000	1	5	109000000	109500000	4	-0.964286
1_2	201500000	202000000	2	5	112000000	112500000	4	-0.964286
1_2	202000000	202500000	5	5	116000000	116500000	4	-0.964286
1_2	202500000	203000000	1	5	123500000	124000000	4	-0.964286
1_2	203000000	203500000	1	5	125000000	125500000	4	-0.964286
1_2	203500000	204000000	3	5	126500000	127000000	4	-0.964286
1_2	204000000	204500000	4	5	128000000	128500000	4	-0.964286
1_2	204500000	205000000	3	5	131000000	131500000	4	-0.964286
1_2	205000000	205500000	2	5	132000000	132500000	4	-0.964286
1_2	205500000	206000000	0	5	134500000	135000000	4	-0.964286
1_2	206000000	206500000	3	5	138000000	138500000	4	-0.964286
1_2	206500000	207000000	1	5	140500000	141000000	4	-0.964286
1_2	207000000	207500000	2	5	143500000	144000000	4	-0.964286
1_2	207500000	208000000	1	5	144000000	144500000	4	-0.964286
1_2	208000000	208500000	2	5	146000000	146500000	4	-0.964286
1_2	208500000	209000000	4	5	147000000	147500000	4	-0.964286
1_2	209000000	209500000	0	5	153000000	153500000	4	-0.964286
1_2	209500000	210000000	7	5	164000000	164500000	4	-0.964286
1_2	210000000	210500000	3	5	165000000	165500000	4	-0.964286
1_2	210500000	211000000	1	5	190000000	190500000	4	-0.964286
1_2	211000000	211500000	1	5	193000000	193500000	4	-0.964286
1_2	211500000	212000000	0	6	3000000	3500000	4	-0.964286
1_2	212000000	212500000	4	6	4500000	5000000	4	-0.964286
1_2	212500000	213000000	0	6	6000000	6500000	4	-0.964286
1_2	213000000	213500000	3	6	12500000	13000000	4	-0.964286
1_2	213500000	214000000	3	6	14500000	15000000	4	-0.964286
1_2	214000000	214500000	0	6	15000000	15500000	4	-0.964286
1_2	214500000	215000000	5	6	18500000	19000000	4	-0.964286
1_2	215000000	215500000	1	6	19500000	20000000	4	-0.964286
1_2	215500000	216000000	0	6	25500000	26000000	4	-0.964286
1_2	216000000	216500000	0	6	27500000	28000000	4	-0.964286
1_2	216500000	217000000	4	6	32000000	32500000	4	-0.964286
1_2	217000000	217500000	1	6	38000000	38500000	4	-0.964286
1_2	217500000	218000000	3	6	41000000	41500000	4	-0.964286
1_2	218000000	218500000	8	6	43000000	43500000	4	-0.964286
1_2	218500000	219000000	5	6	44000000	44500000	4	-0.964286
1_2	219000000	219500000	5	6	47500000	48000000	4	-0.964286
1_2	219500000	220000000	3	6	51000000	51500000	4	-0.964286
1_2	220000000	220500000	2	6	55500000	56000000	4	-0.964286
1_2	220500000	221000000	0	6	60000000	60500000	4	-0.964286
1_2	221000000	221500000	7	6	62500000	63000000	4	-0.964286
1_2	221500000	222000000	2	6	63500000	64000000	4	-0.964286
1_2	222000000	222500000	3	6	65000000	65500000	4	-0.964286
1_2	222500000	223000000	2	6	71000000	71500000	4	-0.964286
1_2	223000000	223500000	1	6	74000000	74500000	4	-0.964286
1_2	223500000	224000000	6	6	74500000	75000000	4	-0.964286
1_2	224000000	224500000	0	6	78500000	79000000	4	-0.964286
1_2	224500000	225000000	6	6	97000000	97500000	4	-0.964286
1_2	225000000	225500000	0	6	99000000	99500000	4	-0.964286
1_2	225500000	226000000	2	6	108000000	108500000	4	-0.964286
1_2	226000000	226500000	5	6	111000000	111500000	4	-0.964286
1_2	226500000	227000000	0	6	112500000	113000000	4	-0.964286
1_2	227000000	227500000	0	6	113000000	113500000	4	-0.964286
1_2	227500000	228000000	6	6	119500000	120000000	4	-0.964286
1_2	228000000	228500000	2	6	122000000	122500000	4	-0.964286
1_2	228500000	229000000	1	6	123500000	124000000	4	-0.964286
1_2	229000000	229500000	0	6	139500000	140000000	4	-0.964286
1_2	229500000	230000000	4	6	143500000	144000000	4	-0.964286
1_2	230000000	230500000	2	6	150500000	151000000	4	-0.964286
1_2	230500000	231000000	5	7	7000000	7500000	4	-0.964286
1_2	231000000	231500000	5	7	15000000	15500000	4	-0.964286
1_2	231500000	232000000	2	7	19000000	19500000	4	-0.964286
1_2	232000000	232500000	1	7	22000000	22500000	4	-0.964286
1_2	232500000	233000000	3	7	26000000	26500000	4	-0.964286
1_2	233000000	233500000	2	7	35000000	35500000	4	-0.964286
1_2	233500000	234000000	2	7	38500000	39000000	4	-0.964286
1_2	234000000	234500000	4	7	41000000	41500000	4	-0.964286
1_2	234500000	235000000	1	7	46500000	47000000	4	-0.964286
1_2	235000000	235500000	5	7	52000000	52500000	4	-0.964286
1_2	235500000	236000000	0	7	58000000	58500000	4	-0.964286
1_2	236000000	236500000	1	7	59500000	60000000	4	-0.964286
1_2	236500000	237000000	2	7	63500000	64000000	4	-0.964286
1_2	237000000	237500000	1	7	75500000	76000000	4	-0.964286
1_2	237500000	238000000	0	7	81000000	81500000	4	-0.964286
1_2	238000000	238500000	0	7	89000000	89500000	4	-0.964286
1_2	238500000	239000000	2	7	91000000	91500000	4	-0.964286
1_2	239000000	239500000	1	7	92000000	92500000	4	-0.964286
1_2	239500000	240000000	2	7	94000000	94500000	4	-0.964286
1_2	240000000	240500000	0	7	98000000	98500000	4	-0.964286
1_2	240500000	241000000	0	7	99000000	99500000	4	-0.964286
1_2	241000000	241500000	5	7	100000000	100500000	4	-0.964286
1_2	241500000	242000000	4	7	102000000	102500000	4	-0.964286
1_2	242000000	242500000	4	7	107000000	107500000	4	-0.964286
1_2	242500000	243000000	0	7	107500000	108000000	4	-0.964286
1_2	243000000	243500000	2	7	109500000	110000000	4	-0.964286
1_2	243500000	244000000	2	7	114500000	115000000	4	-0.964286
1_2	244000000	244500000	5	7	123500000	124000000	4	-0.964286
1_2	244500000	245000000	0	7	132500000	133000000	4	-0.964286
1_2	245000000	245500000	2	8	4500000	5000000	4	-0.964286
1_2	245500000	246000000	0	8	8500000	9000000	4	-0.964286
1_2	246000000	246500000	1	8	10500000	11000000	4	-0.964286
1_2	246500000	247000000	6	8	13000000	13500000	4	-0.964286
1_2	247000000	247500000	1	8	14500000	15000000	4	-0.964286
1_2	247500000	248000000	0	8	16000000	16500000	4	-0.964286
1_2	248000000	248500000	2	8	16500000	17000000	4	-0.964286
1_2	248500000	249000000	2	8	26500000	27000000	4	-0.964286
1_2	249000000	249500000	2	8	40500000	41000000	4	-0.964286
1_2	249500000	250000000	1	8	42000000	42500000	4	-0.964286
1_2	250000000	250500000	0	8	43500000	44000000	4	-0.964286
1_2	250500000	251000000	0	8	45000000	45500000	4	-0.964286
1_2	251000000	251500000	0	8	48000000	48500000	4	-0.964286
1_2	251500000	252000000	2	8	49000000	49500000	4	-0.964286
1_2	252000000	252500000	3	8	62000000	62500000	4	-0.964286
1_2	252500000	253000000	5	8	63000000	63500000	4	-0.964286
1_2	253000000	253500000	1	8	70500000	71000000	4	-0.964286
1_2	253500000	254000000	1	8	84500000	85000000	4	-0.964286
1_2	254000000	254500000	1	8	91500000	92000000	4	-0.964286
1_2	254500000	255000000	1	8	92000000	92500000	4	-0.964286
1_2	255000000	255500000	1	8	94000000	94500000	4	-0.964286
1_2	255500000	256000000	1	8	94500000	95000000	4	-0.964286
1_2	256000000	256500000	1	8	97000000	97500000	4	-0.964286
1_2	256500000	257000000	1	9	0	500000	4	-0.964286
1_2	257000000	257500000	4	9	10500000	11000000	4	-0.964286
1_2	257500000	258000000	0	9	26000000	26500000	4	-0.964286
1_2	258000000	258500000	1	9	27000000	27500000	4	-0.964286
1_2	258500000	259000000	0	X	0	500000	4	-0.964286
1_2	259000000	259500000	4	X	4500000	5000000	4	-0.964286
1_2	259500000	260000000	1	X	6500000	7000000	4	-0.964286
1_2	260000000	260500000	2	X	26000000	26500000	4	-0.964286
1_2	260500000	261000000	1	X	27500000	28000000	4	-0.964286
1_2	261000000	261500000	1	X	34500000	35000000	4	-0.964286
1_2	261500000	262000000	2	X	45500000	46000000	4	-0.964286
1_2	262000000	262500000	2	X	85500000	86000000	4	-0.964286
1_2	262500000	263000000	1	X	93500000	94000000	4	-0.964286
1_2	263000000	263500000	0	X	94000000	94500000	4	-0.964286
1_2	263500000	264000000	5	X	94500000	95000000	4	-0.964286
1_2	264000000	264500000	0	X	112000000	112500000	4	-0.964286
1_2	264500000	265000000	5	10	9000000	9500000	3	-1
1_2	265000000	265500000	0	10	9500000	10000000	3	-1
1_2	265500000	266000000	6	10	11000000	11500000	3	-1
1_2	266000000	266500000	2	10	16500000	17000000	3	-1
1_2	266500000	267000000	3	10	17000000	17500000	3	-1
1_2	267000000	267500000	1	10	20500000	21000000	3	-1
1_2	267500000	268000000	5	10	28500000	29000000	3	-1
1_2	268000000	268500000	1	1_1	0	500000	3	-1
1_2	268500000	269000000	1	1_1	8000000	8500000	3	-1
1_2	269000000	269500000	3	1_1	10000000	10500000	3	-1
1_2	269500000	270000000	0	1_1	11500000	12000000	3	-1
1_2	270000000	270500000	2	1_1	13000000	13500000	3	-1
1_2	270500000	271000000	1	1_1	15500000	16000000	3	-1
1_2	271000000	271500000	3	1_1	18500000	19000000	3	-1
1_2	271500000	272000000	1	1_1	19000000	19500000	3	-1
1_2	272000000	272500000	2	1_1	19500000	20000000	3	-1
1_2	272500000	273000000	1	1_1	21500000	22000000	3	-1
1_2	273000000	273500000	3	1_1	27000000	27500000	3	-1
1_2	273500000	274000000	1	1_1	27500000	28000000	3	-1
1_2	274000000	274391693	2	1_1	28500000	29000000	3	-1
2	0	500000	3	1_1	29500000	30000000	3	-1
2	500000	1000000	3	1_1	30000000	30500000	3	-1
2	1000000	1500000	4	1_1	37000000	37500000	3	-1
2	1500000	2000000	2	1_1	38500000	39000000	3	-1
2	2000000	2500000	8	1_1	40500000	41000000	3	-1
2	2500000	3000000	2	1_1	44000000	44500000	3	-1
2	3000000	3500000	3	1_1	46500000	47000000	3	-1
2	3500000	4000000	0	1_1	49500000	50000000	3	-1
2	4000000	4500000	1	1_1	57000000	57500000	3	-1
2	4500000	5000000	0	1_1	57500000	58000000	3	-1
2	5000000	5500000	0	1_1	73500000	74000000	3	-1
2	5500000	6000000	8	1_1	76000000	76500000	3	-1
2	6000000	6500000	4	1_1	78500000	79000000	3	-1
2	6500000	7000000	4	1_1	79500000	80000000	3	-1
2	7000000	7500000	1	1_1	81500000	82000000	3	-1
2	7500000	8000000	9	1_1	89000000	89500000	3	-1
2	8000000	8500000	5	1_1	90500000	91000000	3	-1
2	8500000	9000000	0	1_1	94000000	94500000	3	-1
2	9000000	9500000	6	1_1	101500000	102000000	3	-1
2	9500000	10000000	4	1_1	106500000	107000000	3	-1
2	10000000	10500000	4	1_1	107500000	108000000	3	-1
2	10500000	11000000	1	1_1	115500000	116000000	3	-1
2	11000000	11500000	1	1_1	125500000	126000000	3	-1
2	11500000	12000000	4	1_1	126500000	127000000	3	-1
2	12000000	12500000	8	1_1	128500000	129000000	3	-1
2	12500000	13000000	1	1_1	135000000	135500000	3	-1
2	13000000	13500000	0	1_1	137000000	137500000	3	-1
2	13500000	14000000	3	1_1	140500000	141000000	3	-1
2	14000000	14500000	2	1_1	143500000	144000000	3	-1
2	14500000	15000000	2	1_1	152500000	153000000	3	-1
2	15000000	15500000	3	1_1	153500000	154000000	3	-1
2	15500000	16000000	1	1_1	156500000	157000000	3	-1
2	16000000	16500000	2	1_1	159500000	160000000	3	-1
2	16500000	17000000	3	1_1	161500000	162000000	3	-1
2	17000000	17500000	3	1_1	163500000	164000000	3	-1
2	17500000	18000000	1	1_1	164000000	164500000	3	-1
2	18000000	18500000	1	1_1	165500000	166000000	3	-1
2	18500000	19000000	7	1_1	169500000	170000000	3	-1
2	19000000	19500000	1	1_1	180000000	180500000	3	-1
2	19500000	20000000	1	1_1	182500000	183000000	3	-1
2	20000000	20500000	0	1_1	183500000	184000000	3	-1
2	20500000	21000000	0	1_1	184000000	184500000	3	-1
2	21000000	21500000	2	1_1	185000000	185500000	3	-1
2	21500000	22000000	5	1_1	187000000	187500000	3	-1
2	22000000	22500000	2	1_1	187500000	188000000	3	-1
2	22500000	23000000	3	1_1	194000000	194500000	3	-1
2	23000000	23500000	0	1_1	198000000	198500000	3	-1
2	23500000	24000000	4	1_1	201000000	201500000	3	-1
2	24000000	24500000	3	1_1	202500000	203000000	3	-1
2	24500000	25000000	1	1_1	209000000	209500000	3	-1
2	25000000	25500000	2	1_1	210000000	210500000	3	-1
2	25500000	26000000	3	1_1	217000000	217500000	3	-1
2	26000000	26500000	1	1_1	218500000	219000000	3	-1
2	26500000	27000000	2	1_1	224000000	224500000	3	-1
2	27000000	27500000	3	1_1	226000000	226500000	3	-1
2	27500000	28000000	1	1_1	231000000	231500000	3	-1
2	28000000	28500000	2	1_1	235500000	236000000	3	-1
2	28500000	29000000	1	1_1	236500000	237000000	3	-1
2	29000000	29500000	3	1_1	237500000	238000000	3	-1
2	29500000	30000000	0	1_1	240500000	241000000	3	-1
2	30000000	30500000	3	1_1	245500000	246000000	3	-1
2	30500000	31000000	5	1_1	246000000	246500000	3	-1
2	31000000	31500000	1	1_1	249000000	249500000	3	-1
2	31500000	32000000	0	1_1	250500000	251000000	3	-1
2	32000000	32500000	1	1_1	254000000	254500000	3	-1
2	32500000	33000000	5	1_1	263000000	263500000	3	-1
2	33000000	33500000	3	1_1	264000000	264500000	3	-1
2	33500000	34000000	0	1_1	272000000	272500000	3	-1
2	34000000	34500000	5	1_1	273500000	274000000	3	-1
2	34500000	35000000	14	1_1	275500000	275698159	3	-1
2	35000000	35500000	1	1_2	0	500000	3	-1
2	35500000	36000000	0	1_2	6000000	6500000	3	-1
2	36000000	36500000	9	1_2	6500000	7000000	3	-1
2	36500000	37000000	5	1_2	8000000	8500000	3	-1
2	37000000	37500000	1	1_2	8500000	9000000	3	-1
2	37500000	38000000	6	1_2	10000000	10500000	3	-1
2	38000000	38500000	2	1_2	14500000	15000000	3	-1
2	38500000	39000000	2	1_2	15000000	15500000	3	-1
2	39000000	39500000	2	1_2	18000000	18500000	3	-1
2	39500000	40000000	2	1_2	21500000	22000000	3	-1
2	40000000	40500000	2	1_2	22500000	23000000	3	-1
2	40500000	41000000	0	1_2	33000000	33500000	3	-1
2	41000000	41500000	16	1_2	34000000	34500000	3	-1
2	41500000	42000000	1	1_2	40000000	40500000	3	-1
2	42000000	42500000	1	1_2	41500000	42000000	3	-1
2	42500000	43000000	1	1_2	42500000	43000000	3	-1
2	43000000	43500000	4	1_2	44500000	45000000	3	-1
2	43500000	44000000	4	1_2	46500000	47000000	3	-1
2	44000000	44500000	2	1_2	55000000	55500000	3	-1
2	44500000	45000000	0	1_2	56000000	56500000	3	-1
2	45000000	45500000	3	1_2	56500000	57000000	3	-1
2	45500000	46000000	1	1_2	58000000	58500000	3	-1
2	46000000	46500000	3	1_2	58500000	59000000	3	-1
2	46500000	47000000	2	1_2	60500000	61000000	3	-1
2	47000000	47500000	4	1_2	62500000	63000000	3	-1
2	47500000	48000000	2	1_2	64500000	65000000	3	-1
2	48000000	48500000	0	1_2	68500000	69000000	3	-1
2	48500000	49000000	1	1_2	69000000	69500000	3	-1
2	49000000	49500000	3	1_2	70000000	70500000	3	-1
2	49500000	50000000	4	1_2	71500000	72000000	3	-1
2	50000000	50500000	2	1_2	73000000	73500000	3	-1
2	50500000	51000000	2	1_2	73500000	74000000	3	-1
2	51000000	51500000	4	1_2	74000000	74500000	3	-1
2	51500000	52000000	4	1_2	81500000	82000000	3	-1
2	52000000	52500000	4	1_2	86500000	87000000	3	-1
2	52500000	53000000	5	1_2	87500000	88000000	3	-1
2	53000000	53500000	2	1_2	95000000	95500000	3	-1
2	53500000	54000000	1	1_2	97000000	97500000	3	-1
2	54000000	54500000	5	1_2	99000000	99500000	3	-1
2	54500000	55000000	4	1_2	106000000	106500000	3	-1
2	55000000	55500000	1	1_2	115000000	115500000	3	-1
2	55500000	56000000	2	1_2	115500000	116000000	3	-1
2	56000000	56500000	2	1_2	116000000	116500000	3	-1
2	56500000	57000000	3	1_2	126000000	126500000	3	-1
2	57000000	57500000	5	1_2	127000000	127500000	3	-1
2	57500000	58000000	0	1_2	133000000	133500000	3	-1
2	58000000	58500000	3	1_2	134500000	135000000	3	-1
2	58500000	59000000	1	1_2	144000000	144500000	3	-1
2	59000000	59500000	0	1_2	149500000	150000000	3	-1
2	59500000	60000000	4	1_2	150000000	150500000	3	-1
2	60000000	60500000	2	1_2	152000000	152500000	3	-1
2	60500000	61000000	5	1_2	154500000	155000000	3	-1
2	61000000	61500000	4	1_2	155500000	156000000	3	-1
2	61500000	62000000	3	1_2	157000000	157500000	3	-1
2	62000000	62500000	1	1_2	162500000	163000000	3	-1
2	62500000	63000000	3	1_2	163500000	164000000	3	-1
2	63000000	63500000	3	1_2	164000000	164500000	3	-1
2	63500000	64000000	1	1_2	165000000	165500000	3	-1
2	64000000	64500000	6	1_2	165500000	166000000	3	-1
2	64500000	65000000	1	1_2	169500000	170000000	3	-1
2	65000000	65500000	0	1_2	171500000	172000000	3	-1
2	65500000	66000000	2	1_2	172500000	173000000	3	-1
2	66000000	66500000	1	1_2	175000000	175500000	3	-1
2	66500000	67000000	3	1_2	177500000	178000000	3	-1
2	67000000	67500000	2	1_2	182500000	183000000	3	-1
2	67500000	68000000	2	1_2	185000000	185500000	3	-1
2	68000000	68500000	0	1_2	186000000	186500000	3	-1
2	68500000	69000000	3	1_2	188000000	188500000	3	-1
2	69000000	69500000	5	1_2	190500000	191000000	3	-1
2	69500000	70000000	2	1_2	199500000	200000000	3	-1
2	70000000	70500000	1	1_2	203500000	204000000	3	-1
2	70500000	71000000	2	1_2	204500000	205000000	3	-1
2	71000000	71500000	1	1_2	206000000	206500000	3	-1
2	71500000	72000000	1	1_2	210000000	210500000	3	-1
2	72000000	72500000	1	1_2	213000000	213500000	3	-1
2	72500000	73000000	3	1_2	213500000	214000000	3	-1
2	73000000	73500000	1	1_2	217500000	218000000	3	-1
2	73500000	74000000	4	1_2	219500000	220000000	3	-1
2	74000000	74500000	2	1_2	222000000	222500000	3	-1
2	74500000	75000000	3	1_2	232500000	233000000	3	-1
2	75000000	75500000	4	1_2	252000000	252500000	3	-1
2	75500000	76000000	0	1_2	266500000	267000000	3	-1
2	76000000	76500000	1	1_2	269000000	269500000	3	-1
2	76500000	77000000	2	1_2	271000000	271500000	3	-1
2	77000000	77500000	2	1_2	273000000	273500000	3	-1
2	77500000	78000000	0	2	0	500000	3	-1
2	78000000	78500000	1	2	500000	1000000	3	-1
2	78500000	79000000	2	2	3000000	3500000	3	-1
2	79000000	79500000	5	2	13500000	14000000	3	-1
2	79500000	80000000	7	2	15000000	15500000	3	-1
2	80000000	80500000	1	2	16500000	17000000	3	-1
2	80500000	81000000	1	2	17000000	17500000	3	-1
2	81000000	81500000	3	2	22500000	23000000	3	-1
2	81500000	82000000	1	2	24000000	24500000	3	-1
2	82000000	82500000	1	2	25500000	26000000	3	-1
2	82500000	83000000	4	2	27000000	27500000	3	-1
2	83000000	83500000	0	2	29000000	29500000	3	-1
2	83500000	84000000	0	2	30000000	30500000	3	-1
2	84000000	84500000	2	2	33000000	33500000	3	-1
2	84500000	85000000	0	2	45000000	45500000	3	-1
2	85000000	85500000	1	2	46000000	46500000	3	-1
2	85500000	86000000	2	2	49000000	49500000	3	-1
2	86000000	86500000	2	2	56500000	57000000	3	-1
2	86500000	87000000	0	2	58000000	58500000	3	-1
2	87000000	87500000	5	2	61500000	62000000	3	-1
2	87500000	88000000	2	2	62500000	63000000	3	-1
2	88000000	88500000	1	2	63000000	63500000	3	-1
2	88500000	89000000	3	2	66500000	67000000	3	-1
2	89000000	89500000	0	2	68500000	69000000	3	-1
2	89500000	90000000	4	2	72500000	73000000	3	-1
2	90000000	90500000	3	2	74500000	75000000	3	-1
2	90500000	91000000	2	2	81000000	81500000	3	-1
2	91000000	91500000	4	2	88500000	89000000	3	-1
2	91500000	92000000	0	2	90000000	90500000	3	-1
2	92000000	92500000	0	2	92500000	93000000	3	-1
2	92500000	93000000	3	2	94500000	95000000	3	-1
2	93000000	93500000	2	2	100000000	100500000	3	-1
2	93500000	94000000	4	2	111000000	111500000	3	-1
2	94000000	94500000	4	2	111500000	112000000	3	-1
2	94500000	95000000	3	2	125000000	125500000	3	-1
2	95000000	95500000	2	2	129500000	130000000	3	-1
2	95500000	96000000	4	2	132000000	132500000	3	-1
2	96000000	96500000	2	2	136000000	136500000	3	-1
2	96500000	97000000	4	2	139000000	139500000	3	-1
2	97000000	97500000	1	2	142500000	143000000	3	-1
2	97500000	98000000	2	2	143500000	144000000	3	-1
2	98000000	98500000	1	2	145500000	146000000	3	-1
2	98500000	99000000	0	2	153500000	154000000	3	-1
2	99000000	99500000	1	2	156000000	156500000	3	-1
2	99500000	100000000	6	2	161500000	162000000	3	-1
2	100000000	100500000	3	2	162000000	162500000	3	-1
2	100500000	101000000	1	2	165000000	165500000	3	-1
2	101000000	101500000	2	2	168000000	168500000	3	-1
2	101500000	102000000	4	2	170000000	170500000	3	-1
2	102000000	102500000	0	2	172000000	172500000	3	-1
2	102500000	103000000	2	2	173500000	174000000	3	-1
2	103000000	103500000	1	2	174500000	175000000	3	-1
2	103500000	104000000	0	2	183000000	183500000	3	-1
2	104000000	104500000	1	2	184000000	184500000	3	-1
2	104500000	105000000	0	2	184500000	185000000	3	-1
2	105000000	105500000	0	2	186000000	186500000	3	-1
2	105500000	106000000	2	2	187000000	187500000	3	-1
2	106000000	106500000	1	2	191000000	191500000	3	-1
2	106500000	107000000	7	2	198000000	198500000	3	-1
2	107000000	107500000	1	2	216500000	217000000	3	-1
2	107500000	108000000	1	2	221500000	222000000	3	-1
2	108000000	108500000	5	2	227500000	228000000	3	-1
2	108500000	109000000	1	2	228000000	228500000	3	-1
2	109000000	109500000	0	2	230000000	230500000	3	-1
2	109500000	110000000	1	2	240000000	240500000	3	-1
2	110000000	110500000	0	2	243500000	244000000	3	-1
2	110500000	111000000	0	2	247000000	247500000	3	-1
2	111000000	111500000	3	2	248000000	248500000	3	-1
2	111500000	112000000	3	2	251500000	252000000	3	-1
2	112000000	112500000	0	2	252000000	252500000	3	-1
2	112500000	113000000	1	2	253000000	253500000	3	-1
2	113000000	113500000	0	2	255000000	255500000	3	-1
2	113500000	114000000	1	2	257500000	258000000	3	-1
2	114000000	114500000	1	2	265000000	265500000	3	-1
2	114500000	115000000	0	2	265500000	266000000	3	-1
2	115000000	115500000	5	2	266500000	267000000	3	-1
2	115500000	116000000	1	2	268000000	268500000	3	-1
2	116000000	116500000	1	2	269000000	269500000	3	-1
2	116500000	117000000	1	2	271000000	271500000	3	-1
2	117000000	117500000	1	2	272000000	272500000	3	-1
2	117500000	118000000	1	2	273000000	273500000	3	-1
2	118000000	118500000	2	2	273500000	274000000	3	-1
2	118500000	119000000	1	2	278000000	278500000	3	-1
2	119000000	119500000	0	2	279500000	280000000	3	-1
2	119500000	120000000	2	2	284500000	285000000	3	-1
2	120000000	120500000	2	2	285000000	285500000	3	-1
2	120500000	121000000	2	2	286500000	287000000	3	-1
2	121000000	121500000	0	2	288000000	288500000	3	-1
2	121500000	122000000	1	2	292000000	292500000	3	-1
2	122000000	122500000	1	2	299000000	299500000	3	-1
2	122500000	123000000	1	2	303500000	304000000	3	-1
2	123000000	123500000	6	2	305500000	306000000	3	-1
2	123500000	124000000	0	2	308500000	309000000	3	-1
2	124000000	124500000	0	2	310000000	310500000	3	-1
2	124500000	125000000	2	2	317000000	317500000	3	-1
2	125000000	125500000	3	2	318000000	318500000	3	-1
2	125500000	126000000	0	2	321500000	322000000	3	-1
2	126000000	126500000	2	2	326000000	326500000	3	-1
2	126500000	127000000	2	2	331000000	331500000	3	-1
2	127000000	127500000	1	2	331500000	332000000	3	-1
2	127500000	128000000	1	2	333500000	334000000	3	-1
2	128000000	128500000	5	2	335000000	335500000	3	-1
2	128500000	129000000	2	2	336500000	337000000	3	-1
2	129000000	129500000	2	2	339500000	340000000	3	-1
2	129500000	130000000	3	2	344000000	344500000	3	-1
2	130000000	130500000	2	2	344500000	345000000	3	-1
2	130500000	131000000	0	2	347000000	347500000	3	-1
2	131000000	131500000	5	2	349500000	350000000	3	-1
2	131500000	132000000	4	2	351500000	352000000	3	-1
2	132000000	132500000	3	2	357500000	358000000	3	-1
2	132500000	133000000	1	2	363000000	363500000	3	-1
2	133000000	133500000	2	2	364500000	365000000	3	-1
2	133500000	134000000	0	2	367000000	367500000	3	-1
2	134000000	134500000	0	2	368000000	368500000	3	-1
2	134500000	135000000	1	2	374000000	374500000	3	-1
2	135000000	135500000	1	2	376000000	376500000	3	-1
2	135500000	136000000	0	2	379000000	379500000	3	-1
2	136000000	136500000	3	2	383500000	384000000	3	-1
2	136500000	137000000	0	2	384000000	384500000	3	-1
2	137000000	137500000	0	2	391500000	392000000	3	-1
2	137500000	138000000	2	2	396500000	397000000	3	-1
2	138000000	138500000	0	2	403000000	403500000	3	-1
2	138500000	139000000	0	2	407500000	408000000	3	-1
2	139000000	139500000	3	2	411500000	412000000	3	-1
2	139500000	140000000	0	2	413000000	413500000	3	-1
2	140000000	140500000	1	2	420500000	421000000	3	-1
2	140500000	141000000	1	2	431500000	432000000	3	-1
2	141000000	141500000	0	2	433000000	433500000	3	-1
2	141500000	142000000	0	2	434500000	435000000	3	-1
2	142000000	142500000	2	2	441000000	441500000	3	-1
2	142500000	143000000	3	2	443000000	443500000	3	-1
2	143000000	143500000	1	2	444500000	445000000	3	-1
2	143500000	144000000	3	2	447000000	447500000	3	-1
2	144000000	144500000	0	2	450000000	450500000	3	-1
2	144500000	145000000	1	2	452000000	452500000	3	-1
2	145000000	145500000	0	2	453000000	453500000	3	-1
2	145500000	146000000	3	2	455000000	455500000	3	-1
2	146000000	146500000	0	2	455500000	456000000	3	-1
2	146500000	147000000	0	2	457000000	457500000	3	-1
2	147000000	147500000	1	2	457500000	458000000	3	-1
2	147500000	148000000	0	2	459500000	460000000	3	-1
2	148000000	148500000	0	3	500000	1000000	3	-1
2	148500000	149000000	1	3	1500000	2000000	3	-1
2	149000000	149500000	1	3	2500000	3000000	3	-1
2	149500000	150000000	5	3	6000000	6500000	3	-1
2	150000000	150500000	2	3	8500000	9000000	3	-1
2	150500000	151000000	2	3	9000000	9500000	3	-1
2	151000000	151500000	1	3	10500000	11000000	3	-1
2	151500000	152000000	4	3	16000000	16500000	3	-1
2	152000000	152500000	2	3	19000000	19500000	3	-1
2	152500000	153000000	0	3	20000000	20500000	3	-1
2	153000000	153500000	1	3	23000000	23500000	3	-1
2	153500000	154000000	3	3	25000000	25500000	3	-1
2	154000000	154500000	0	3	25500000	26000000	3	-1
2	154500000	155000000	1	3	28500000	29000000	3	-1
2	155000000	155500000	2	3	30000000	30500000	3	-1
2	155500000	156000000	1	3	38000000	38500000	3	-1
2	156000000	156500000	3	3	38500000	39000000	3	-1
2	156500000	157000000	0	3	40000000	40500000	3	-1
2	157000000	157500000	0	3	43000000	43500000	3	-1
2	157500000	158000000	2	3	49000000	49500000	3	-1
2	158000000	158500000	0	3	50000000	50500000	3	-1
2	158500000	159000000	0	3	52500000	53000000	3	-1
2	159000000	159500000	1	3	54000000	54500000	3	-1
2	159500000	160000000	5	3	57500000	58000000	3	-1
2	160000000	160500000	0	3	59500000	60000000	3	-1
2	160500000	161000000	1	3	61500000	62000000	3	-1
2	161000000	161500000	2	3	67000000	67500000	3	-1
2	161500000	162000000	3	3	68500000	69000000	3	-1
2	162000000	162500000	3	3	71500000	72000000	3	-1
2	162500000	163000000	0	3	74000000	74500000	3	-1
2	163000000	163500000	2	3	78000000	78500000	3	-1
2	163500000	164000000	0	3	79000000	79500000	3	-1
2	164000000	164500000	1	3	82000000	82500000	3	-1
2	164500000	165000000	1	3	83000000	83500000	3	-1
2	165000000	165500000	3	3	85000000	85500000	3	-1
2	165500000	166000000	2	3	86500000	87000000	3	-1
2	166000000	166500000	0	3	87000000	87500000	3	-1
2	166500000	167000000	0	3	88000000	88500000	3	-1
2	167000000	167500000	0	3	93000000	93500000	3	-1
2	167500000	168000000	1	3	93500000	94000000	3	-1
2	168000000	168500000	3	3	95000000	95500000	3	-1
2	168500000	169000000	1	3	97500000	98000000	3	-1
2	169000000	169500000	0	3	100000000	100500000	3	-1
2	169500000	170000000	1	3	103000000	103500000	3	-1
2	170000000	170500000	3	3	103500000	104000000	3	-1
2	170500000	171000000	2	3	106500000	107000000	3	-1
2	171000000	171500000	7	3	107000000	107500000	3	-1
2	171500000	172000000	0	3	110500000	111000000	3	-1
2	172000000	172500000	3	3	111000000	111500000	3	-1
2	172500000	173000000	4	3	112500000	113000000	3	-1
2	173000000	173500000	0	3	114500000	115000000	3	-1
2	173500000	174000000	3	3	118500000	119000000	3	-1
2	174000000	174500000	1	3	121500000	122000000	3	-1
2	174500000	175000000	3	3	130500000	131000000	3	-1
2	175000000	175500000	0	3	132500000	133000000	3	-1
2	175500000	176000000	4	3	134000000	134500000	3	-1
2	176000000	176500000	1	3	134500000	135000000	3	-1
2	176500000	177000000	2	3	138000000	138500000	3	-1
2	177000000	177500000	2	3	138500000	139000000	3	-1
2	177500000	178000000	0	3	139000000	139500000	3	-1
2	178000000	178500000	1	3	149000000	149500000	3	-1
2	178500000	179000000	5	3	150000000	150500000	3	-1
2	179000000	179500000	1	3	153000000	153500000	3	-1
2	179500000	180000000	0	3	155500000	156000000	3	-1
2	180000000	180500000	0	3	161000000	161500000	3	-1
2	180500000	181000000	2	3	162500000	163000000	3	-1
2	181000000	181500000	2	3	166000000	166500000	3	-1
2	181500000	182000000	4	3	169000000	169500000	3	-1
2	182000000	182500000	0	3	172000000	172500000	3	-1
2	182500000	183000000	1	3	172500000	173000000	3	-1
2	183000000	183500000	3	3	176500000	177000000	3	-1
2	183500000	184000000	1	3	178000000	178500000	3	-1
2	184000000	184500000	3	3	180500000	181000000	3	-1
2	184500000	185000000	3	3	182500000	183000000	3	-1
2	185000000	185500000	0	3	186000000	186500000	3	-1
2	185500000	186000000	1	3	189000000	189500000	3	-1
2	186000000	186500000	3	3	189500000	190000000	3	-1
2	186500000	187000000	2	3	191500000	192000000	3	-1
2	187000000	187500000	3	3	192500000	193000000	3	-1
2	187500000	188000000	4	3	194500000	195000000	3	-1
2	188000000	188500000	0	3	195500000	196000000	3	-1
2	188500000	189000000	0	3	201000000	201500000	3	-1
2	189000000	189500000	2	3	209000000	209500000	3	-1
2	189500000	190000000	2	3	211000000	211500000	3	-1
2	190000000	190500000	1	3	215500000	216000000	3	-1
2	190500000	191000000	4	3	217000000	217500000	3	-1
2	191000000	191500000	3	3	217500000	218000000	3	-1
2	191500000	192000000	1	3	218500000	219000000	3	-1
2	192000000	192500000	0	3	220000000	220500000	3	-1
2	192500000	193000000	0	3	221500000	222000000	3	-1
2	193000000	193500000	1	3	223500000	224000000	3	-1
2	193500000	194000000	1	3	224500000	225000000	3	-1
2	194000000	194500000	1	3	228000000	228500000	3	-1
2	194500000	195000000	4	3	228500000	229000000	3	-1
2	195000000	195500000	1	3	231000000	231500000	3	-1
2	195500000	196000000	1	3	234000000	234500000	3	-1
2	196000000	196500000	6	3	235000000	235500000	3	-1
2	196500000	197000000	0	3	244500000	245000000	3	-1
2	197000000	197500000	0	3	250000000	250500000	3	-1
2	197500000	198000000	2	3	251000000	251500000	3	-1
2	198000000	198500000	3	3	257500000	258000000	3	-1
2	198500000	199000000	1	3	258000000	258500000	3	-1
2	199000000	199500000	2	3	258500000	259000000	3	-1
2	199500000	200000000	0	3	264500000	265000000	3	-1
2	200000000	200500000	0	3	265000000	265500000	3	-1
2	200500000	201000000	0	3	266500000	267000000	3	-1
2	201000000	201500000	2	3	276500000	277000000	3	-1
2	201500000	202000000	0	3	282500000	282827514	3	-1
2	202000000	202500000	0	4	2000000	2500000	3	-1
2	202500000	203000000	2	4	3000000	3500000	3	-1
2	203000000	203500000	1	4	3500000	4000000	3	-1
2	203500000	204000000	2	4	6500000	7000000	3	-1
2	204000000	204500000	0	4	7500000	8000000	3	-1
2	204500000	205000000	5	4	8500000	9000000	3	-1
2	205000000	205500000	2	4	9000000	9500000	3	-1
2	205500000	206000000	1	4	14000000	14500000	3	-1
2	206000000	206500000	1	4	14500000	15000000	3	-1
2	206500000	207000000	2	4	15500000	16000000	3	-1
2	207000000	207500000	0	4	18000000	18500000	3	-1
2	207500000	208000000	2	4	22000000	22500000	3	-1
2	208000000	208500000	1	4	30000000	30500000	3	-1
2	208500000	209000000	0	4	34500000	35000000	3	-1
2	209000000	209500000	2	4	35500000	36000000	3	-1
2	209500000	210000000	0	4	36000000	36500000	3	-1
2	210000000	210500000	0	4	42500000	43000000	3	-1
2	210500000	211000000	1	4	43500000	44000000	3	-1
2	211000000	211500000	1	4	44000000	44500000	3	-1
2	211500000	212000000	0	4	46500000	47000000	3	-1
2	212000000	212500000	0	4	48000000	48500000	3	-1
2	212500000	213000000	0	4	54000000	54500000	3	-1
2	213000000	213500000	2	4	55500000	56000000	3	-1
2	213500000	214000000	1	4	59500000	60000000	3	-1
2	214000000	214500000	0	4	65000000	65500000	3	-1
2	214500000	215000000	0	4	68500000	69000000	3	-1
2	215000000	215500000	2	4	74500000	75000000	3	-1
2	215500000	216000000	4	4	77000000	77500000	3	-1
2	216000000	216500000	0	4	78500000	79000000	3	-1
2	216500000	217000000	3	4	79500000	80000000	3	-1
2	217000000	217500000	0	4	81000000	81500000	3	-1
2	217500000	218000000	1	4	83000000	83500000	3	-1
2	218000000	218500000	1	4	84000000	84500000	3	-1
2	218500000	219000000	2	4	84500000	85000000	3	-1
2	219000000	219500000	0	4	86000000	86500000	3	-1
2	219500000	220000000	0	4	89000000	89500000	3	-1
2	220000000	220500000	4	4	93500000	94000000	3	-1
2	220500000	221000000	1	4	97000000	97500000	3	-1
2	221000000	221500000	0	4	99000000	99500000	3	-1
2	221500000	222000000	3	4	102000000	102500000	3	-1
2	222000000	222500000	1	4	103000000	103500000	3	-1
2	222500000	223000000	1	4	103500000	104000000	3	-1
2	223000000	223500000	2	4	111000000	111500000	3	-1
2	223500000	224000000	1	4	112500000	113000000	3	-1
2	224000000	224500000	1	4	113000000	113500000	3	-1
2	224500000	225000000	1	4	114000000	114500000	3	-1
2	225000000	225500000	6	4	114500000	115000000	3	-1
2	225500000	226000000	0	4	116500000	117000000	3	-1
2	226000000	226500000	5	4	120000000	120500000	3	-1
2	226500000	227000000	1	4	121000000	121500000	3	-1
2	227000000	227500000	1	4	123000000	123500000	3	-1
2	227500000	228000000	3	4	127000000	127500000	3	-1
2	228000000	228500000	3	4	130000000	130500000	3	-1
2	228500000	229000000	4	4	130500000	131000000	3	-1
2	229000000	229500000	0	4	132500000	133000000	3	-1
2	229500000	230000000	2	4	134000000	134500000	3	-1
2	230000000	230500000	3	4	142500000	143000000	3	-1
2	230500000	231000000	4	4	145000000	145500000	3	-1
2	231000000	231500000	2	4	148000000	148500000	3	-1
2	231500000	232000000	0	4	153500000	154000000	3	-1
2	232000000	232500000	0	4	157000000	157500000	3	-1
2	232500000	233000000	6	4	159500000	160000000	3	-1
2	233000000	233500000	7	4	161000000	161500000	3	-1
2	233500000	234000000	2	4	162000000	162500000	3	-1
2	234000000	234500000	1	4	169500000	170000000	3	-1
2	234500000	235000000	2	4	171000000	171500000	3	-1
2	235000000	235500000	0	4	172500000	173000000	3	-1
2	235500000	236000000	1	4	173000000	173500000	3	-1
2	236000000	236500000	5	4	175000000	175500000	3	-1
2	236500000	237000000	1	4	178500000	179000000	3	-1
2	237000000	237500000	2	4	181500000	182000000	3	-1
2	237500000	238000000	0	4	184500000	185000000	3	-1
2	238000000	238500000	2	4	185000000	185500000	3	-1
2	238500000	239000000	0	4	188500000	189000000	3	-1
2	239000000	239500000	1	4	189000000	189500000	3	-1
2	239500000	240000000	2	4	202000000	202500000	3	-1
2	240000000	240500000	3	4	202500000	203000000	3	-1
2	240500000	241000000	2	4	213000000	213500000	3	-1
2	241000000	241500000	1	4	214500000	215000000	3	-1
2	241500000	242000000	5	4	216000000	216500000	3	-1
2	242000000	242500000	2	4	217500000	218000000	3	-1
2	242500000	243000000	2	4	218000000	218500000	3	-1
2	243000000	243500000	1	4	218500000	219000000	3	-1
2	243500000	244000000	3	4	224000000	224500000	3	-1
2	244000000	244500000	7	4	226000000	226500000	3	-1
2	244500000	245000000	0	4	227500000	228000000	3	-1
2	245000000	245500000	2	5	1000000	1500000	3	-1
2	245500000	246000000	1	5	2000000	2500000	3	-1
2	246000000	246500000	2	5	2500000	3000000	3	-1
2	246500000	247000000	2	5	5000000	5500000	3	-1
2	247000000	247500000	3	5	9000000	9500000	3	-1
2	247500000	248000000	2	5	13000000	13500000	3	-1
2	248000000	248500000	3	5	14500000	15000000	3	-1
2	248500000	249000000	1	5	18000000	18500000	3	-1
2	249000000	249500000	10	5	19500000	20000000	3	-1
2	249500000	250000000	5	5	21500000	22000000	3	-1
2	250000000	250500000	1	5	24000000	24500000	3	-1
2	250500000	251000000	4	5	30500000	31000000	3	-1
2	251000000	251500000	1	5	31500000	32000000	3	-1
2	251500000	252000000	3	5	32000000	32500000	3	-1
2	252000000	252500000	3	5	33500000	34000000	3	-1
2	252500000	253000000	1	5	43000000	43500000	3	-1
2	253000000	253500000	3	5	47000000	47500000	3	-1
2	253500000	254000000	0	5	50000000	50500000	3	-1
2	254000000	254500000	0	5	58000000	58500000	3	-1
2	254500000	255000000	1	5	62500000	63000000	3	-1
2	255000000	255500000	3	5	65500000	66000000	3	-1
2	255500000	256000000	8	5	66000000	66500000	3	-1
2	256000000	256500000	2	5	67000000	67500000	3	-1
2	256500000	257000000	1	5	73500000	74000000	3	-1
2	257000000	257500000	1	5	75500000	76000000	3	-1
2	257500000	258000000	3	5	79000000	79500000	3	-1
2	258000000	258500000	1	5	79500000	80000000	3	-1
2	258500000	259000000	1	5	84500000	85000000	3	-1
2	259000000	259500000	1	5	85000000	85500000	3	-1
2	259500000	260000000	5	5	85500000	86000000	3	-1
2	260000000	260500000	2	5	86500000	87000000	3	-1
2	260500000	261000000	2	5	90000000	90500000	3	-1
2	261000000	261500000	1	5	93500000	94000000	3	-1
2	261500000	262000000	1	5	97000000	97500000	3	-1
2	262000000	262500000	0	5	100000000	100500000	3	-1
2	262500000	263000000	1	5	102500000	103000000	3	-1
2	263000000	263500000	2	5	104000000	104500000	3	-1
2	263500000	264000000	4	5	105500000	106000000	3	-1
2	264000000	264500000	4	5	108500000	109000000	3	-1
2	264500000	265000000	4	5	109500000	110000000	3	-1
2	265000000	265500000	3	5	111500000	112000000	3	-1
2	265500000	266000000	3	5	112500000	113000000	3	-1
2	266000000	266500000	1	5	114000000	114500000	3	-1
2	266500000	267000000	3	5	114500000	115000000	3	-1
2	267000000	267500000	4	5	119500000	120000000	3	-1
2	267500000	268000000	2	5	121500000	122000000	3	-1
2	268000000	268500000	3	5	122500000	123000000	3	-1
2	268500000	269000000	2	5	127000000	127500000	3	-1
2	269000000	269500000	3	5	130500000	131000000	3	-1
2	269500000	270000000	4	5	137000000	137500000	3	-1
2	270000000	270500000	1	5	141000000	141500000	3	-1
2	270500000	271000000	1	5	148000000	148500000	3	-1
2	271000000	271500000	3	5	150000000	150500000	3	-1
2	271500000	272000000	5	5	156500000	157000000	3	-1
2	272000000	272500000	3	5	158000000	158500000	3	-1
2	272500000	273000000	0	5	160500000	161000000	3	-1
2	273000000	273500000	3	5	163000000	163500000	3	-1
2	273500000	274000000	3	5	164500000	165000000	3	-1
2	274000000	274500000	4	5	165500000	166000000	3	-1
2	274500000	275000000	8	5	168000000	168500000	3	-1
2	275000000	275500000	5	5	169000000	169500000	3	-1
2	275500000	276000000	2	5	173000000	173500000	3	-1
2	276000000	276500000	1	5	183500000	184000000	3	-1
2	276500000	277000000	1	5	184000000	184500000	3	-1
2	277000000	277500000	1	5	184500000	185000000	3	-1
2	277500000	278000000	1	5	189500000	190000000	3	-1
2	278000000	278500000	3	5	192000000	192500000	3	-1
2	278500000	279000000	4	6	1000000	1500000	3	-1
2	279000000	279500000	0	6	8000000	8500000	3	-1
2	279500000	280000000	3	6	8500000	9000000	3	-1
2	280000000	280500000	5	6	9000000	9500000	3	-1
2	280500000	281000000	0	6	10000000	10500000	3	-1
2	281000000	281500000	0	6	13500000	14000000	3	-1
2	281500000	282000000	0	6	17000000	17500000	3	-1
2	282000000	282500000	5	6	18000000	18500000	3	-1
2	282500000	283000000	7	6	20000000	20500000	3	-1
2	283000000	283500000	0	6	21000000	21500000	3	-1
2	283500000	284000000	2	6	22500000	23000000	3	-1
2	284000000	284500000	0	6	24000000	24500000	3	-1
2	284500000	285000000	3	6	27000000	27500000	3	-1
2	285000000	285500000	3	6	28500000	29000000	3	-1
2	285500000	286000000	4	6	29000000	29500000	3	-1
2	286000000	286500000	4	6	37000000	37500000	3	-1
2	286500000	287000000	3	6	37500000	38000000	3	-1
2	287000000	287500000	1	6	40000000	40500000	3	-1
2	287500000	288000000	0	6	41500000	42000000	3	-1
2	288000000	288500000	3	6	43500000	44000000	3	-1
2	288500000	289000000	0	6	45000000	45500000	3	-1
2	289000000	289500000	0	6	53000000	53500000	3	-1
2	289500000	290000000	4	6	54500000	55000000	3	-1
2	290000000	290500000	0	6	57000000	57500000	3	-1
2	290500000	291000000	1	6	58000000	58500000	3	-1
2	291000000	291500000	2	6	61500000	62000000	3	-1
2	291500000	292000000	0	6	63000000	63500000	3	-1
2	292000000	292500000	3	6	64000000	64500000	3	-1
2	292500000	293000000	0	6	64500000	65000000	3	-1
2	293000000	293500000	2	6	68000000	68500000	3	-1
2	293500000	294000000	5	6	70500000	71000000	3	-1
2	294000000	294500000	1	6	79500000	80000000	3	-1
2	294500000	295000000	2	6	85000000	85500000	3	-1
2	295000000	295500000	2	6	86000000	86500000	3	-1
2	295500000	296000000	0	6	86500000	87000000	3	-1
2	296000000	296500000	0	6	88000000	88500000	3	-1
2	296500000	297000000	0	6	89500000	90000000	3	-1
2	297000000	297500000	1	6	92000000	92500000	3	-1
2	297500000	298000000	0	6	93500000	94000000	3	-1
2	298000000	298500000	2	6	94000000	94500000	3	-1
2	298500000	299000000	6	6	100000000	100500000	3	-1
2	299000000	299500000	3	6	107500000	108000000	3	-1
2	299500000	300000000	0	6	114500000	115000000	3	-1
2	300000000	300500000	1	6	115000000	115500000	3	-1
2	300500000	301000000	1	6	118500000	119000000	3	-1
2	301000000	301500000	2	6	120500000	121000000	3	-1
2	301500000	302000000	2	6	123000000	123500000	3	-1
2	302000000	302500000	0	6	124000000	124500000	3	-1
2	302500000	303000000	2	6	126500000	127000000	3	-1
2	303000000	303500000	1	6	128000000	128500000	3	-1
2	303500000	304000000	3	6	131000000	131500000	3	-1
2	304000000	304500000	1	6	132000000	132500000	3	-1
2	304500000	305000000	1	6	135000000	135500000	3	-1
2	305000000	305500000	4	6	138000000	138500000	3	-1
2	305500000	306000000	3	6	144000000	144500000	3	-1
2	306000000	306500000	0	6	146500000	147000000	3	-1
2	306500000	307000000	1	6	148000000	148500000	3	-1
2	307000000	307500000	2	6	152500000	153000000	3	-1
2	307500000	308000000	0	6	154000000	154500000	3	-1
2	308000000	308500000	4	7	1500000	2000000	3	-1
2	308500000	309000000	3	7	3500000	4000000	3	-1
2	309000000	309500000	1	7	4000000	4500000	3	-1
2	309500000	310000000	1	7	4500000	5000000	3	-1
2	310000000	310500000	3	7	8500000	9000000	3	-1
2	310500000	311000000	0	7	12000000	12500000	3	-1
2	311000000	311500000	0	7	13000000	13500000	3	-1
2	311500000	312000000	1	7	15500000	16000000	3	-1
2	312000000	312500000	0	7	19500000	20000000	3	-1
2	312500000	313000000	1	7	23500000	24000000	3	-1
2	313000000	313500000	0	7	25500000	26000000	3	-1
2	313500000	314000000	1	7	31000000	31500000	3	-1
2	314000000	314500000	1	7	34500000	35000000	3	-1
2	314500000	315000000	1	7	43000000	43500000	3	-1
2	315000000	315500000	0	7	44000000	44500000	3	-1
2	315500000	316000000	2	7	50000000	50500000	3	-1
2	316000000	316500000	5	7	51000000	51500000	3	-1
2	316500000	317000000	2	7	65500000	66000000	3	-1
2	317000000	317500000	3	7	75000000	75500000	3	-1
2	317500000	318000000	11	7	80000000	80500000	3	-1
2	318000000	318500000	3	7	80500000	81000000	3	-1
2	318500000	319000000	6	7	88000000	88500000	3	-1
2	319000000	319500000	8	7	95500000	96000000	3	-1
2	319500000	320000000	0	7	97000000	97500000	3	-1
2	320000000	320500000	2	7	97500000	98000000	3	-1
2	320500000	321000000	2	7	101500000	102000000	3	-1
2	321000000	321500000	5	7	102500000	103000000	3	-1
2	321500000	322000000	3	7	109000000	109500000	3	-1
2	322000000	322500000	1	7	111500000	112000000	3	-1
2	322500000	323000000	2	7	119500000	120000000	3	-1
2	323000000	323500000	1	7	120500000	121000000	3	-1
2	323500000	324000000	2	7	123000000	123500000	3	-1
2	324000000	324500000	2	7	124500000	125000000	3	-1
2	324500000	325000000	0	7	125500000	126000000	3	-1
2	325000000	325500000	6	8	1500000	2000000	3	-1
2	325500000	326000000	4	8	12500000	13000000	3	-1
2	326000000	326500000	3	8	14000000	14500000	3	-1
2	326500000	327000000	5	8	17000000	17500000	3	-1
2	327000000	327500000	2	8	17500000	18000000	3	-1
2	327500000	328000000	8	8	22500000	23000000	3	-1
2	328000000	328500000	4	8	23000000	23500000	3	-1
2	328500000	329000000	4	8	27000000	27500000	3	-1
2	329000000	329500000	1	8	29000000	29500000	3	-1
2	329500000	330000000	4	8	29500000	30000000	3	-1
2	330000000	330500000	4	8	37500000	38000000	3	-1
2	330500000	331000000	1	8	41000000	41500000	3	-1
2	331000000	331500000	3	8	46000000	46500000	3	-1
2	331500000	332000000	3	8	52000000	52500000	3	-1
2	332000000	332500000	2	8	53000000	53500000	3	-1
2	332500000	333000000	2	8	53500000	54000000	3	-1
2	333000000	333500000	1	8	67000000	67500000	3	-1
2	333500000	334000000	3	8	69000000	69500000	3	-1
2	334000000	334500000	4	8	71000000	71500000	3	-1
2	334500000	335000000	2	8	73000000	73500000	3	-1
2	335000000	335500000	3	8	77500000	78000000	3	-1
2	335500000	336000000	1	8	79000000	79500000	3	-1
2	336000000	336500000	0	8	81000000	81500000	3	-1
2	336500000	337000000	3	8	85500000	86000000	3	-1
2	337000000	337500000	5	8	87000000	87500000	3	-1
2	337500000	338000000	4	8	88500000	89000000	3	-1
2	338000000	338500000	5	8	89500000	90000000	3	-1
2	338500000	339000000	0	8	93000000	93500000	3	-1
2	339000000	339500000	6	8	95000000	95500000	3	-1
2	339500000	340000000	3	8	97500000	98000000	3	-1
2	340000000	340500000	4	9	500000	1000000	3	-1
2	340500000	341000000	7	9	1000000	1500000	3	-1
2	341000000	341500000	2	9	3000000	3500000	3	-1
2	341500000	342000000	0	9	10000000	10500000	3	-1
2	342000000	342500000	4	9	11500000	12000000	3	-1
2	342500000	343000000	2	9	22000000	22500000	3	-1
2	343000000	343500000	0	9	22500000	23000000	3	-1
2	343500000	344000000	1	9	24000000	24500000	3	-1
2	344000000	344500000	3	9	25000000	25500000	3	-1
2	344500000	345000000	3	X	4000000	4500000	3	-1
2	345000000	345500000	1	X	5500000	6000000	3	-1
2	345500000	346000000	5	X	6000000	6500000	3	-1
2	346000000	346500000	2	X	7000000	7500000	3	-1
2	346500000	347000000	5	X	11500000	12000000	3	-1
2	347000000	347500000	3	X	13000000	13500000	3	-1
2	347500000	348000000	1	X	15500000	16000000	3	-1
2	348000000	348500000	1	X	18000000	18500000	3	-1
2	348500000	349000000	2	X	20500000	21000000	3	-1
2	349000000	349500000	1	X	26500000	27000000	3	-1
2	349500000	350000000	3	X	36500000	37000000	3	-1
2	350000000	350500000	0	X	61000000	61500000	3	-1
2	350500000	351000000	1	X	67000000	67500000	3	-1
2	351000000	351500000	2	X	79500000	80000000	3	-1
2	351500000	352000000	3	X	82500000	83000000	3	-1
2	352000000	352500000	4	X	84500000	85000000	3	-1
2	352500000	353000000	2	X	86000000	86500000	3	-1
2	353000000	353500000	1	X	101500000	102000000	3	-1
2	353500000	354000000	0	X	113000000	113500000	3	-1
2	354000000	354500000	1	X	119500000	120000000	3	-1
2	354500000	355000000	0	10	0	500000	2	-1.03571
2	355000000	355500000	0	10	3500000	4000000	2	-1.03571
2	355500000	356000000	0	10	7500000	8000000	2	-1.03571
2	356000000	356500000	0	10	14000000	14500000	2	-1.03571
2	356500000	357000000	4	10	15500000	16000000	2	-1.03571
2	357000000	357500000	0	10	27500000	28000000	2	-1.03571
2	357500000	358000000	3	10	30000000	30500000	2	-1.03571
2	358000000	358500000	4	1_1	1000000	1500000	2	-1.03571
2	358500000	359000000	2	1_1	7000000	7500000	2	-1.03571
2	359000000	359500000	2	1_1	9000000	9500000	2	-1.03571
2	359500000	360000000	1	1_1	10500000	11000000	2	-1.03571
2	360000000	360500000	0	1_1	11000000	11500000	2	-1.03571
2	360500000	361000000	0	1_1	12500000	13000000	2	-1.03571
2	361000000	361500000	1	1_1	15000000	15500000	2	-1.03571
2	361500000	362000000	9	1_1	16000000	16500000	2	-1.03571
2	362000000	362500000	2	1_1	18000000	18500000	2	-1.03571
2	362500000	363000000	4	1_1	23000000	23500000	2	-1.03571
2	363000000	363500000	3	1_1	24500000	25000000	2	-1.03571
2	363500000	364000000	1	1_1	25000000	25500000	2	-1.03571
2	364000000	364500000	2	1_1	34500000	35000000	2	-1.03571
2	364500000	365000000	3	1_1	35000000	35500000	2	-1.03571
2	365000000	365500000	4	1_1	45500000	46000000	2	-1.03571
2	365500000	366000000	4	1_1	46000000	46500000	2	-1.03571
2	366000000	366500000	4	1_1	47000000	47500000	2	-1.03571
2	366500000	367000000	1	1_1	51500000	52000000	2	-1.03571
2	367000000	367500000	3	1_1	52500000	53000000	2	-1.03571
2	367500000	368000000	4	1_1	53500000	54000000	2	-1.03571
2	368000000	368500000	3	1_1	54500000	55000000	2	-1.03571
2	368500000	369000000	2	1_1	59000000	59500000	2	-1.03571
2	369000000	369500000	0	1_1	61000000	61500000	2	-1.03571
2	369500000	370000000	1	1_1	62000000	62500000	2	-1.03571
2	370000000	370500000	2	1_1	63000000	63500000	2	-1.03571
2	370500000	371000000	1	1_1	64000000	64500000	2	-1.03571
2	371000000	371500000	0	1_1	65500000	66000000	2	-1.03571
2	371500000	372000000	0	1_1	69500000	70000000	2	-1.03571
2	372000000	372500000	0	1_1	74000000	74500000	2	-1.03571
2	372500000	373000000	4	1_1	82000000	82500000	2	-1.03571
2	373000000	373500000	1	1_1	82500000	83000000	2	-1.03571
2	373500000	374000000	0	1_1	85500000	86000000	2	-1.03571
2	374000000	374500000	3	1_1	88000000	88500000	2	-1.03571
2	374500000	375000000	0	1_1	90000000	90500000	2	-1.03571
2	375000000	375500000	2	1_1	99500000	100000000	2	-1.03571
2	375500000	376000000	10	1_1	102000000	102500000	2	-1.03571
2	376000000	376500000	3	1_1	103000000	103500000	2	-1.03571
2	376500000	377000000	1	1_1	103500000	104000000	2	-1.03571
2	377000000	377500000	1	1_1	105000000	105500000	2	-1.03571
2	377500000	378000000	6	1_1	107000000	107500000	2	-1.03571
2	378000000	378500000	1	1_1	112000000	112500000	2	-1.03571
2	378500000	379000000	4	1_1	113500000	114000000	2	-1.03571
2	379000000	379500000	3	1_1	114500000	115000000	2	-1.03571
2	379500000	380000000	0	1_1	116000000	116500000	2	-1.03571
2	380000000	380500000	0	1_1	117000000	117500000	2	-1.03571
2	380500000	381000000	1	1_1	129000000	129500000	2	-1.03571
2	381000000	381500000	2	1_1	131000000	131500000	2	-1.03571
2	381500000	382000000	0	1_1	131500000	132000000	2	-1.03571
2	382000000	382500000	0	1_1	133000000	133500000	2	-1.03571
2	382500000	383000000	2	1_1	133500000	134000000	2	-1.03571
2	383000000	383500000	2	1_1	134500000	135000000	2	-1.03571
2	383500000	384000000	3	1_1	135500000	136000000	2	-1.03571
2	384000000	384500000	3	1_1	137500000	138000000	2	-1.03571
2	384500000	385000000	1	1_1	139500000	140000000	2	-1.03571
2	385000000	385500000	4	1_1	146000000	146500000	2	-1.03571
2	385500000	386000000	1	1_1	147000000	147500000	2	-1.03571
2	386000000	386500000	5	1_1	150000000	150500000	2	-1.03571
2	386500000	387000000	2	1_1	154000000	154500000	2	-1.03571
2	387000000	387500000	4	1_1	155500000	156000000	2	-1.03571
2	387500000	388000000	4	1_1	157500000	158000000	2	-1.03571
2	388000000	388500000	1	1_1	159000000	159500000	2	-1.03571
2	388500000	389000000	0	1_1	160000000	160500000	2	-1.03571
2	389000000	389500000	5	1_1	161000000	161500000	2	-1.03571
2	389500000	390000000	1	1_1	162500000	163000000	2	-1.03571
2	390000000	390500000	0	1_1	163000000	163500000	2	-1.03571
2	390500000	391000000	2	1_1	166500000	167000000	2	-1.03571
2	391000000	391500000	4	1_1	168500000	169000000	2	-1.03571
2	391500000	392000000	3	1_1	169000000	169500000	2	-1.03571
2	392000000	392500000	0	1_1	174000000	174500000	2	-1.03571
2	392500000	393000000	2	1_1	177500000	178000000	2	-1.03571
2	393000000	393500000	1	1_1	178000000	178500000	2	-1.03571
2	393500000	394000000	2	1_1	182000000	182500000	2	-1.03571
2	394000000	394500000	4	1_1	183000000	183500000	2	-1.03571
2	394500000	395000000	1	1_1	197000000	197500000	2	-1.03571
2	395000000	395500000	1	1_1	197500000	198000000	2	-1.03571
2	395500000	396000000	1	1_1	199500000	200000000	2	-1.03571
2	396000000	396500000	1	1_1	201500000	202000000	2	-1.03571
2	396500000	397000000	3	1_1	203500000	204000000	2	-1.03571
2	397000000	397500000	1	1_1	206500000	207000000	2	-1.03571
2	397500000	398000000	2	1_1	209500000	210000000	2	-1.03571
2	398000000	398500000	2	1_1	213000000	213500000	2	-1.03571
2	398500000	399000000	1	1_1	214000000	214500000	2	-1.03571
2	399000000	399500000	0	1_1	216000000	216500000	2	-1.03571
2	399500000	400000000	1	1_1	219500000	220000000	2	-1.03571
2	400000000	400500000	6	1_1	229000000	229500000	2	-1.03571
2	400500000	401000000	5	1_1	237000000	237500000	2	-1.03571
2	401000000	401500000	1	1_1	239000000	239500000	2	-1.03571
2	401500000	402000000	1	1_1	243000000	243500000	2	-1.03571
2	402000000	402500000	1	1_1	244500000	245000000	2	-1.03571
2	402500000	403000000	1	1_1	245000000	245500000	2	-1.03571
2	403000000	403500000	3	1_1	251000000	251500000	2	-1.03571
2	403500000	404000000	4	1_1	253500000	254000000	2	-1.03571
2	404000000	404500000	1	1_1	257000000	257500000	2	-1.03571
2	404500000	405000000	7	1_1	260000000	260500000	2	-1.03571
2	405000000	405500000	0	1_1	264500000	265000000	2	-1.03571
2	405500000	406000000	2	1_1	267500000	268000000	2	-1.03571
2	406000000	406500000	1	1_1	268500000	269000000	2	-1.03571
2	406500000	407000000	1	1_1	269000000	269500000	2	-1.03571
2	407000000	407500000	1	1_1	270000000	270500000	2	-1.03571
2	407500000	408000000	3	1_1	270500000	271000000	2	-1.03571
2	408000000	408500000	0	1_1	271000000	271500000	2	-1.03571
2	408500000	409000000	5	1_1	274000000	274500000	2	-1.03571
2	409000000	409500000	1	1_2	500000	1000000	2	-1.03571
2	409500000	410000000	1	1_2	9000000	9500000	2	-1.03571
2	410000000	410500000	2	1_2	9500000	10000000	2	-1.03571
2	410500000	411000000	9	1_2	11000000	11500000	2	-1.03571
2	411000000	411500000	2	1_2	12000000	12500000	2	-1.03571
2	411500000	412000000	3	1_2	13000000	13500000	2	-1.03571
2	412000000	412500000	0	1_2	13500000	14000000	2	-1.03571
2	412500000	413000000	2	1_2	18500000	19000000	2	-1.03571
2	413000000	413500000	3	1_2	23500000	24000000	2	-1.03571
2	413500000	414000000	2	1_2	24500000	25000000	2	-1.03571
2	414000000	414500000	0	1_2	27000000	27500000	2	-1.03571
2	414500000	415000000	5	1_2	31500000	32000000	2	-1.03571
2	415000000	415500000	4	1_2	36500000	37000000	2	-1.03571
2	415500000	416000000	4	1_2	37500000	38000000	2	-1.03571
2	416000000	416500000	0	1_2	39000000	39500000	2	-1.03571
2	416500000	417000000	1	1_2	39500000	40000000	2	-1.03571
2	417000000	417500000	2	1_2	40500000	41000000	2	-1.03571
2	417500000	418000000	1	1_2	43500000	44000000	2	-1.03571
2	418000000	418500000	1	1_2	44000000	44500000	2	-1.03571
2	418500000	419000000	0	1_2	49000000	49500000	2	-1.03571
2	419000000	419500000	1	1_2	49500000	50000000	2	-1.03571
2	419500000	420000000	2	1_2	51500000	52000000	2	-1.03571
2	420000000	420500000	2	1_2	52000000	52500000	2	-1.03571
2	420500000	421000000	3	1_2	52500000	53000000	2	-1.03571
2	421000000	421500000	4	1_2	53500000	54000000	2	-1.03571
2	421500000	422000000	1	1_2	54000000	54500000	2	-1.03571
2	422000000	422500000	1	1_2	55500000	56000000	2	-1.03571
2	422500000	423000000	2	1_2	61000000	61500000	2	-1.03571
2	423000000	423500000	1	1_2	63000000	63500000	2	-1.03571
2	423500000	424000000	2	1_2	63500000	64000000	2	-1.03571
2	424000000	424500000	1	1_2	64000000	64500000	2	-1.03571
2	424500000	425000000	1	1_2	70500000	71000000	2	-1.03571
2	425000000	425500000	0	1_2	75500000	76000000	2	-1.03571
2	425500000	426000000	1	1_2	80000000	80500000	2	-1.03571
2	426000000	426500000	2	1_2	81000000	81500000	2	-1.03571
2	426500000	427000000	2	1_2	84500000	85000000	2	-1.03571
2	427000000	427500000	5	1_2	85000000	85500000	2	-1.03571
2	427500000	428000000	1	1_2	86000000	86500000	2	-1.03571
2	428000000	428500000	1	1_2	88000000	88500000	2	-1.03571
2	428500000	429000000	1	1_2	93000000	93500000	2	-1.03571
2	429000000	429500000	1	1_2	94500000	95000000	2	-1.03571
2	429500000	430000000	0	1_2	96500000	97000000	2	-1.03571
2	430000000	430500000	1	1_2	99500000	100000000	2	-1.03571
2	430500000	431000000	0	1_2	100500000	101000000	2	-1.03571
2	431000000	431500000	4	1_2	102000000	102500000	2	-1.03571
2	431500000	432000000	3	1_2	103000000	103500000	2	-1.03571
2	432000000	432500000	2	1_2	104000000	104500000	2	-1.03571
2	432500000	433000000	2	1_2	106500000	107000000	2	-1.03571
2	433000000	433500000	3	1_2	107500000	108000000	2	-1.03571
2	433500000	434000000	0	1_2	109000000	109500000	2	-1.03571
2	434000000	434500000	6	1_2	109500000	110000000	2	-1.03571
2	434500000	435000000	3	1_2	110000000	110500000	2	-1.03571
2	435000000	435500000	2	1_2	111000000	111500000	2	-1.03571
2	435500000	436000000	2	1_2	112000000	112500000	2	-1.03571
2	436000000	436500000	1	1_2	116500000	117000000	2	-1.03571
2	436500000	437000000	2	1_2	118000000	118500000	2	-1.03571
2	437000000	437500000	4	1_2	118500000	119000000	2	-1.03571
2	437500000	438000000	0	1_2	119500000	120000000	2	-1.03571
2	438000000	438500000	0	1_2	120000000	120500000	2	-1.03571
2	438500000	439000000	1	1_2	123500000	124000000	2	-1.03571
2	439000000	439500000	0	1_2	130000000	130500000	2	-1.03571
2	439500000	440000000	9	1_2	130500000	131000000	2	-1.03571
2	440000000	440500000	0	1_2	133500000	134000000	2	-1.03571
2	440500000	441000000	4	1_2	134000000	134500000	2	-1.03571
2	441000000	441500000	3	1_2	139500000	140000000	2	-1.03571
2	441500000	442000000	1	1_2	140500000	141000000	2	-1.03571
2	442000000	442500000	1	1_2	141000000	141500000	2	-1.03571
2	442500000	443000000	4	1_2	141500000	142000000	2	-1.03571
2	443000000	443500000	3	1_2	142000000	142500000	2	-1.03571
2	443500000	444000000	9	1_2	148000000	148500000	2	-1.03571
2	444000000	444500000	5	1_2	150500000	151000000	2	-1.03571
2	444500000	445000000	3	1_2	151000000	151500000	2	-1.03571
2	445000000	445500000	2	1_2	154000000	154500000	2	-1.03571
2	445500000	446000000	0	1_2	158500000	159000000	2	-1.03571
2	446000000	446500000	1	1_2	161500000	162000000	2	-1.03571
2	446500000	447000000	2	1_2	164500000	165000000	2	-1.03571
2	447000000	447500000	3	1_2	170000000	170500000	2	-1.03571
2	447500000	448000000	2	1_2	172000000	172500000	2	-1.03571
[truncated: 2,605 more rows]

## Sheet: S18
Table S18: Expression data of differentially expressed genes that correlate with eccDNA. Numerical data used for Figure 6.
RefSeq ID	Gene Name	C0	ST0	C12	ST12
XP_027247220.1	Akr1b1	8.79556	8.8172	9.68263	13.006
XP_027248224.1	Nap1l1	2.32841	1.74481	2.00899	0
XP_027255412.1	Dhdds	7.85216	7.80981	5.50502	5.92061
XP_027256312.1	LOC100756057	3.64754	3.47392	0.571919	1.12631
XP_027262413.1	LOC100768019	5.49405	5.58085	2.62059	3.43222
XP_027267088.1	Aph1b	1.10434	1.43002	3.57785	4.13742
XP_027267116.1	Pclaf	8.02604	8.07598	0	1.76341
XP_027267138.1	Parp16	2.5724	3.17879	4.89939	3.16148
XP_027269518.1	Hmgb1	9.78282	9.80877	7.25816	7.51745
XP_027271739.1	Tpst2	2.92609	1.90843	0	2.23143
XP_027272688.1	Chaf1a	5.20918	5.1107	2.79462	3.13972
XP_027273454.1	Nucks1	8.12993	8.05215	5.66998	6.06791
XP_027274193.1	Zfp36l1	5.7905	5.91024	6.9036	8.16009
XP_027277101.1	Myl9	2.10836	1.081	4.42183	3.2235
XP_027279595.1	St6galnac6	0	0.345964	1.53556	2.3591
XP_027284211.1	Xrcc2	3.78921	3.79421	0.415218	0.474047
XP_027289121.1	Suv39h1	2.16672	2.53456	0	1.08576
XP_035302946.1	LOC113836333	6.29715	6.25971	3.49653	4.05736
XP_035309685.1	LOC113831620	2.26918	0.943734	0	1.44281
