# Supplementary material for: Microevolutionary dynamics of eccDNA in Chinese hamster ovary cells grown in fed-batch cultures under control and lactate-stressed conditions
Source: Research Square preprint supplement (doi:10.21203/rs.3.rs-2306689/v1), 2022-12-05
Supplement: Supplementary file 2 [file 3b0c46c5592f077e5b498ade.xlsx]

## Sheet: Sheet1
Condition	Sequences	Sequences Clustered	Max Length (bp)	Average Length (bp)	Total Bases	Repeat bases masked	GC (%)	eccDNA with genes	eccDNA with tRNA	ORI (>95%)
Day 0	56460	46053	24113	4063	187,135,316 bp	67,898,424 bp ( 36.28 %)	0.4085	1,622 (3.52%)	4,520 (9.81%)	4639
Control Day 12	19354	15047	24309	3579	53,852,662 bp	19,774,911 (36.72%)	0.4092	486 (3.23%)	1,182 (7.86%)	134
Stressed Day 12	19703	15217	21482	3534	53,776,705 bp	20,494,955 bp ( 38.11 %)	0.4051	451 (2.96%)	1,151 (7.56%)	12
		Day 0			Control Day 12			Lactate-stressed Day 12
Repeat Structure	Subcategory	Number of Sequences	Base pairs (bp)	Percent of total bases	Number of Sequences	Base pairs (bp)	Percent of total bases	Number of Sequences	Base pairs (bp)	Percent of total bases
SINEs:		117690	15191341	8.12	31575	4032279	7.49	30,448	3,883,277	7.22
	Alu/B1	49213	5792592	3.1	13346	1563504	2.9	12,844	1,497,972	2.79
	MIRs	6756	759480	0.41	1764	195634	0.36	1,643	186,465	0.35
LINEs:		57169	24875542	13.3	16901	7686694	14.3	18,410	8,590,588	16
	LINE1	52788	562110	12.9	15764	7508682	13.9	17,240	8,407,560	15.6
	LINE2	3575	83775	0.3	918	144521	0.27	932	149,331	0.28
	L3/CR1	567	83775	0.04	160	24152	0.04	166	23,420	0.04
	RTE	213	34675	0.02	54	8805	0.02	63	9,279	0.02
LTR elements:		62652	17620142	9.42	18266	5017165	9.32	18,007	4,909,086	9.13
	ERVL	5964	1634524	0.87	1700	461014	0.86	1,650	420,104	0.78
	ERVL-MaLRs	28941	7395572	3.95	8234	2054567	3.82	8,092	1,991,508	3.7
	ERR_class I	5591	1136525	0.61	1709	330819	0.61	1,645	326,866	0.61
	ERV_class II	21634	7209443	3.85	6450	2089133	3.88	6,451	2,103,571	3.91
DNA elements:		11960	2185216	1.17	3351	588742	1.09	3,250	567,968	1.06
	hAT-Charlie	7181	1238630	0.66	2060	340327	0.63	2,002	329,155	0.61
	TcMar-Tigger	3066	635180	0.34	808	161611	0.3	803	162,637	0.3
Unclassified:		2445	921187	0.49	684	255392	0.47	768	322,187	0.6
Total Interspaced Repeats:		-	60793428	32.5	-	17.580,272	32.7	-	18273106	34
Small RNA:		3405	267780	0.14	1071	87090	0.16	929	71,975	0.13
Satellites		6319	2860952	1.53	1994	937053	1.74	2,066	1,001,624	1.86
Simple Repeats		74529	3580819	1.91	21490	1054443	1.96	20,814	1,033,385	1.92
Low Complexity		9021	456155	0.24	2547	130081	0.24	2,518	130,232	0.24
